# Supplementary material
Source: Research Square preprint supplement (doi:10.21203/rs.3.rs-8800638/v1)
Supplement: Supplementary file 1 [file 627fea0a8a24cb767d37f87c.xlsx]

## Sheet: EUR_meta_EWPS_results
Variable	Estimate	CI_lower	CI_upper	p_value	k_value	i2_value	p_value2	Z_value	SE_value
627	-0.48987	-0.515716	-0.464024	4.69177e-302	3	99.3604	5e-302	-37.1465	18.1969
626	-0.765639	-0.791764	-0.739513	0	2	99.8804	5e-302	-37.1465	28.4408
626.1	-0.771131	-0.798706	-0.743556	0	2	99.8992	5e-302	-37.1465	28.6448
626.12	-0.923932	-0.966158	-0.881706	0	1	0	5e-302	-37.1465	34.3208
626.13	-0.598624	-0.633964	-0.563284	1.07756e-241	2	99.8884	1.07756e-241	-33.2	19.8743
627.2	-0.724288	-0.750199	-0.698378	0	2	98.9459	5e-302	-37.1465	26.9048
626.11	-1.00253	-1.05933	-0.945724	0	1	0	5e-302	-37.1465	37.2404
614	-0.555409	-0.588354	-0.522464	0	1	0	5e-302	-37.1465	20.6315
614.5	-0.548695	-0.583063	-0.514327	0	1	0	5e-302	-37.1465	20.3821
465.2	-0.441551	-0.47037	-0.412732	3.98879e-198	2	98.2265	3.98879e-198	-30.03	13.2598
625	-0.395341	-0.424833	-0.365849	3.85739e-152	2	99.5061	3.85739e-152	-26.2735	10.387
614.52	-0.520172	-0.556122	-0.484222	6.43589e-177	2	97.8655	6.43589e-177	-28.3593	14.7517
792	-0.611926	-0.653354	-0.570499	0	1	0	5e-302	-37.1465	22.7309
626.2	-0.806702	-0.86537	-0.748034	5.68117e-160	2	99.1272	5.68117e-160	-26.9502	21.7407
743	0.356308	0.329541	0.383076	4.80282e-150	2	96.6761	4.80282e-150	26.0895	9.29589
628	-0.308146	-0.335762	-0.28053	5.07055e-106	2	99.5852	5.07055e-106	-21.8695	6.739
626.14	-0.185193	-0.225828	-0.144558	4.16241e-19	2	99.8384	4.16241e-19	-8.93257	1.65425
743.1	0.362545	0.333712	0.391378	4.20467e-134	2	94.0106	4.20467e-134	24.6446	8.93478
733	0.335271	0.308463	0.362079	1.09467e-132	2	94.7649	1.09467e-132	24.5122	8.21824
743.11	0.362237	0.333298	0.391176	6.53603e-133	2	94.1457	6.53603e-133	24.5332	8.88684
619	-0.356656	-0.386055	-0.327256	5.7765e-125	2	87.6708	5.7765e-125	-23.777	8.48021
465	-0.298548	-0.323645	-0.273452	3.06349e-120	3	94.9914	3.06349e-120	-23.3158	6.9609
340	-0.29306	-0.317827	-0.268292	5.54443e-119	2	98.961	5.54443e-119	-23.1915	6.7965
366	0.339502	0.310795	0.368208	7.33979e-119	2	96.1515	7.33979e-119	23.1794	7.86946
615	-0.723418	-0.783726	-0.663111	0	1	0	5e-302	-37.1465	26.8724
464	-0.361699	-0.39219	-0.331207	0	1	0	5e-302	-37.1465	13.4358
339	-0.339571	-0.368346	-0.310795	2.38068e-118	2	55.8127	2.38068e-118	-23.1287	7.85383
655	-0.928466	-1.0047	-0.852235	6.04463e-126	2	97.4588	6.04463e-126	-23.8716	22.164
218	-0.426605	-0.465405	-0.387805	0	1	0	5e-302	-37.1465	15.8469
627.4	-1.0297	-1.12407	-0.935319	0	1	0	5e-302	-37.1465	38.2495
401	0.285491	0.25845	0.312531	4.00527e-95	2	96.4599	4.00527e-95	20.693	5.90766
841	-0.510139	-0.557092	-0.463185	0	1	0	5e-302	-37.1465	18.9498
272.1	0.133578	0.111846	0.15531	2.00789e-33	3	99.404	2.00789e-33	12.0471	1.60923
272	0.309764	0.280807	0.338721	1.3213e-97	2	87.138	1.3213e-97	20.9667	6.49472
401.1	0.281351	0.254327	0.308375	1.49528e-92	2	96.5215	1.49528e-92	20.4055	5.7411
218.1	-0.417025	-0.456394	-0.377656	0	1	0	5e-302	-37.1465	15.491
180.3	-0.301953	-0.343721	-0.260185	1.42232e-45	2	99.5505	1.42232e-45	-14.1691	4.27842
649	-1.10707	-1.2128	-1.00135	0	1	0	5e-302	-37.1465	41.1239
381.11	-0.405551	-0.446947	-0.364155	3.60734e-82	2	98.012	3.60734e-82	-19.2013	7.78712
654	-1.04378	-1.14568	-0.941878	0	1	0	5e-302	-37.1465	38.7726
180	-0.571214	-0.62739	-0.515038	0	1	0	5e-302	-37.1465	21.2186
304	-0.370985	-0.407787	-0.334184	0	1	0	5e-302	-37.1465	13.7808
300	-0.279411	-0.30719	-0.251632	0	1	0	5e-302	-37.1465	10.3791
367.1	-0.396205	-0.435855	-0.356555	0	1	0	5e-302	-37.1465	14.7176
626.4	-0.970491	-1.06785	-0.873128	0	1	0	5e-302	-37.1465	36.0503
636	-1.06595	-1.17375	-0.958149	0	1	0	5e-302	-37.1465	39.5963
381.1	-0.347592	-0.38398	-0.311204	3.26136e-78	2	96.7296	3.26136e-78	-18.7222	6.50769
638	-1.20288	-1.32787	-1.07788	0	1	0	5e-302	-37.1465	44.6826
427.21	0.473393	0.42394	0.522846	0	1	0	5e-302	37.1465	17.5849
427.2	0.467506	0.418623	0.516389	0	1	0	5e-302	37.1465	17.3662
627.1	0.0567473	0.0389305	0.074564	4.30375e-10	2	99.8444	4.30375e-10	6.24259	0.35425
650	-0.927527	-1.02548	-0.829578	0	1	0	5e-302	-37.1465	34.4543
381	-0.326275	-0.360912	-0.291637	0	1	0	5e-302	-37.1465	12.12
626.8	-0.903931	-1.0002	-0.807662	0	1	0	5e-302	-37.1465	33.5779
706.1	-0.485297	-0.537142	-0.433453	0	1	0	5e-302	-37.1465	18.0271
740	0.253064	0.225835	0.280293	3.85909e-74	2	78.6853	3.85909e-74	18.2159	4.60979
306	-0.432039	-0.47896	-0.385118	0	1	0	5e-302	-37.1465	16.0487
665	-0.916441	-0.998625	-0.834256	6.88159e-106	2	92.137	6.88159e-106	-21.8556	20.0293
619.4	-0.255061	-0.286756	-0.223365	4.81946e-56	2	98.5095	4.81946e-56	-15.7724	4.02292
740.1	0.241779	0.214741	0.268816	9.01669e-69	2	74.7857	9.01669e-69	17.5264	4.2375
300.1	-0.252751	-0.280946	-0.224556	0	1	0	5e-302	-37.1465	9.38881
792.1	-0.524171	-0.582762	-0.46558	0	1	0	5e-302	-37.1465	19.4711
743.9	0.202194	0.175238	0.22915	6.30997e-49	3	98.0859	6.30997e-49	14.7014	2.97254
300.9	-0.63049	-0.702275	-0.558705	0	1	0	5e-302	-37.1465	23.4205
625.1	-0.447331	-0.497303	-0.397359	6.50914e-69	2	95.6298	6.50914e-69	-17.5449	7.84836
785	-0.236128	-0.263153	-0.209104	9.61606e-66	2	16.9721	9.61606e-66	-17.1253	4.04376
740.11	0.113003	0.0937345	0.132272	1.4064e-30	3	98.7396	1.4064e-30	11.4945	1.29891
369	-0.329296	-0.367763	-0.29083	0	1	0	5e-302	-37.1465	12.2322
611.3	-0.198044	-0.225205	-0.170884	2.47582e-46	2	98.6768	2.47582e-46	-14.2914	2.83033
300.4	-0.395699	-0.442145	-0.349253	0	1	0	5e-302	-37.1465	14.6988
369.5	-0.342309	-0.382584	-0.302035	0	1	0	5e-302	-37.1465	12.7156
296	-0.239137	-0.267407	-0.210867	0	1	0	5e-302	-37.1465	8.88311
782.6	-0.443566	-0.496091	-0.39104	0	1	0	5e-302	-37.1465	16.4769
433	0.161114	0.130798	0.19143	2.08924e-25	2	99.4427	2.08924e-25	10.4163	1.67821
728	-0.313036	-0.350458	-0.275614	0	1	0	5e-302	-37.1465	11.6282
610	-0.25941	-0.291767	-0.227054	1.22325e-55	2	95.6435	1.22325e-55	-15.7135	4.07623
367.4	-0.287091	-0.322369	-0.251812	2.84739e-57	2	89.6298	2.84739e-57	-15.95	4.5791
634	-0.674778	-0.748711	-0.600845	1.45502e-71	2	97.2565	1.45502e-71	-17.8883	12.0706
367	-0.227616	-0.25703	-0.198202	5.84302e-52	3	95.4992	5.84302e-52	-15.1671	3.45227
840	-0.230699	-0.259208	-0.202189	1.1997e-56	2	90.1457	1.1997e-56	-15.86	3.65887
411.4	0.31601	0.277697	0.354323	0	1	0	5e-302	37.1465	11.7387
614.51	-0.257636	-0.306298	-0.208974	3.16331e-25	2	99.3543	3.16331e-25	-10.3768	2.67343
78	-0.27774	-0.31416	-0.24132	1.63389e-50	2	96.6915	1.63389e-50	-14.9468	4.15133
728.7	-0.295474	-0.332627	-0.258321	8.8748e-55	2	75.4174	8.8748e-55	-15.5873	4.60565
256	-0.880452	-0.992156	-0.768748	0	1	0	5e-302	-37.1465	32.7057
300.12	-0.333373	-0.378977	-0.287768	1.47182e-46	2	98.0788	1.47182e-46	-14.3276	4.77642
296.2	-0.224045	-0.252626	-0.195464	0	1	0	5e-302	-37.1465	8.32248
366.2	0.237068	0.20589	0.268246	3.15169e-50	2	91.9294	3.15169e-50	14.903	3.53303
610.1	-0.212339	-0.244191	-0.180486	5.17309e-39	3	96.9417	5.17309e-39	-13.0657	2.77435
112	-0.236668	-0.264924	-0.208412	1.45665e-60	2	96.2192	1.45665e-60	-16.4165	3.88526
79	-0.230464	-0.259204	-0.201724	1.15677e-55	2	95.4842	1.15677e-55	-15.717	3.6222
611	-0.20258	-0.229722	-0.175437	1.85202e-48	2	95.1081	1.85202e-48	-14.6284	2.96341
622	-0.365181	-0.412333	-0.318029	0	1	0	5e-302	-37.1465	13.5652
474	-0.621961	-0.702385	-0.541538	0	1	0	5e-302	-37.1465	23.1037
585.33	0.393288	0.342123	0.444453	0	1	0	5e-302	37.1465	14.6093
401.2	0.371451	0.323025	0.419878	0	1	0	5e-302	37.1465	13.7981
272.13	0.243455	0.21116	0.275749	2.108e-49	2	84.795	2.108e-49	14.7755	3.59716
743.12	0.463508	0.401955	0.525062	0	1	0	5e-302	37.1465	17.2177
440	0.416677	0.361036	0.472319	0	1	0	5e-302	37.1465	15.4781
278	-0.199741	-0.227154	-0.172329	2.8627e-46	2	88.692	2.8627e-46	-14.2813	2.85256
301	-0.686003	-0.77871	-0.593297	0	1	0	5e-302	-37.1465	25.4826
362.2	0.35374	0.305882	0.401599	0	1	0	5e-302	37.1465	13.1402
761	-0.214741	-0.244012	-0.18547	7.02548e-47	2	66.6403	7.02548e-47	-14.3788	3.08772
661	-0.970243	-1.1045	-0.835985	0	1	0	5e-302	-37.1465	36.0411
433.1	0.225134	0.179726	0.270542	2.53978e-22	2	99.089	2.53978e-22	9.71748	2.18774
296.1	-0.331798	-0.383584	-0.280013	3.60024e-36	2	97.9577	3.60024e-36	-12.5578	4.16667
433.3	0.0942586	0.0613631	0.127154	1.9534e-08	2	99.465	1.9534e-08	5.61608	0.529363
612	-0.471465	-0.537456	-0.405474	0	1	0	5e-302	-37.1465	17.5133
652	-0.947238	-1.07992	-0.814554	0	1	0	5e-302	-37.1465	35.1865
306.9	-0.383185	-0.441364	-0.325007	3.99816e-38	2	96.6266	3.99816e-38	-12.9091	4.94659
440.9	0.2433	0.185275	0.301326	2.06715e-16	2	99.3056	2.06715e-16	8.21812	1.99947
613.5	-0.298124	-0.340472	-0.255776	0	1	0	5e-302	-37.1465	11.0742
300.8	-0.517423	-0.591167	-0.443678	0	1	0	5e-302	-37.1465	19.2204
367.2	-0.111932	-0.13728	-0.0865838	4.93801e-18	2	99.1252	4.93801e-18	-8.65479	0.968747
783	-0.180779	-0.207014	-0.154543	1.45549e-41	2	97.1378	1.45549e-41	-13.5053	2.44147
835	-0.305294	-0.349041	-0.261546	0	1	0	5e-302	-37.1465	11.3406
278.4	-0.347928	-0.397859	-0.297998	0	1	0	5e-302	-37.1465	12.9243
411	0.23156	0.197391	0.265729	2.92738e-40	2	87.1766	2.92738e-40	13.2824	3.07568
842	-0.483914	-0.553926	-0.413902	0	1	0	5e-302	-37.1465	17.9757
302	-0.569031	-0.651573	-0.48649	0	1	0	5e-302	-37.1465	21.1375
939	-0.190413	-0.219376	-0.161451	5.41044e-38	2	91.1013	5.41044e-38	-12.8858	2.45363
585.3	3.66458e-05	-0.027243	0.0273163	0.997899	2	99.6457	0.997899	0.0026329	9.64846e-08
278.1	-0.189332	-0.217844	-0.16082	1.00262e-38	2	81.9249	1.00262e-38	-13.0152	2.4642
497	-0.241616	-0.275612	-0.207621	4.16539e-44	2	0	4.16539e-44	-13.93	3.36571
475	-0.187523	-0.214496	-0.160549	2.81394e-42	3	76.0929	2.81394e-42	-13.6258	2.55514
687.1	-0.207211	-0.238721	-0.175701	5.21526e-38	2	82.8169	5.21526e-38	-12.8886	2.67067
474.1	-0.719329	-0.827534	-0.611125	0	1	0	5e-302	-37.1465	26.7205
457.3	0.274451	0.233044	0.315857	0	1	0	5e-302	37.1465	10.1949
300.11	-0.272941	-0.314212	-0.23167	0	1	0	5e-302	-37.1465	10.1388
840.3	-0.282464	-0.325329	-0.239599	0	1	0	5e-302	-37.1465	10.4925
613	-0.185126	-0.21492	-0.155332	4.05887e-34	2	95.6812	4.05887e-34	-12.1783	2.25451
585	0.257053	0.21785	0.296256	0	1	0	5e-302	37.1465	9.54862
726	-0.16761	-0.188027	-0.147194	2.98955e-58	3	52.8348	2.98955e-58	-16.0902	2.69688
278.11	-0.244479	-0.282656	-0.206302	0	1	0	5e-302	-37.1465	9.08154
395.2	0.301324	0.249843	0.352805	1.82657e-30	2	96.1813	1.82657e-30	11.4719	3.45675
258.1	-0.845996	-0.978503	-0.71349	0	1	0	5e-302	-37.1465	31.4258
720.1	0.263876	0.222361	0.305392	0	1	0	5e-302	37.1465	9.80207
947	-0.279717	-0.32803	-0.231404	7.62187e-30	2	96.3376	7.62187e-30	-11.3476	3.17412
619.2	0.0377068	0.00789583	0.0675178	0.013172	2	99.5951	0.013172	2.47909	0.0934784
427.22	0.518995	0.436894	0.601096	0	1	0	5e-302	37.1465	19.2788
305	-0.645195	-0.74761	-0.542779	0	1	0	5e-302	-37.1465	23.9667
305.2	-0.645195	-0.74761	-0.542779	0	1	0	5e-302	-37.1465	23.9667
789	-0.190938	-0.221391	-0.160484	1.04493e-34	2	0	1.04493e-34	-12.2884	2.34633
258	-0.781327	-0.907526	-0.655127	0	1	0	5e-302	-37.1465	29.0235
382	-0.260439	-0.302601	-0.218277	0	1	0	5e-302	-37.1465	9.67438
521.1	-0.223093	-0.265306	-0.180879	3.84481e-25	2	98.2131	3.84481e-25	-10.3581	2.31082
401.21	0.40078	0.335403	0.466157	0	1	0	5e-302	37.1465	14.8875
313.1	-0.503299	-0.585635	-0.420962	0	1	0	5e-302	-37.1465	18.6958
520	-0.725098	-0.843765	-0.60643	0	1	0	5e-302	-37.1465	26.9348
313	-0.458368	-0.533401	-0.383336	0	1	0	5e-302	-37.1465	17.0268
379.3	-0.055422	-0.0833951	-0.027449	0.000103086	2	99.2088	0.000103086	-3.88321	0.215215
303	-0.390303	-0.454908	-0.325698	0	1	0	5e-302	-37.1465	14.4984
428.4	0.429712	0.358286	0.501138	0	1	0	5e-302	37.1465	15.9623
495	-0.191831	-0.223881	-0.159782	8.80404e-32	2	0	8.80404e-32	-11.7314	2.25044
702.1	0.202812	0.168802	0.236822	0	1	0	5e-302	37.1465	7.53376
669	-0.764105	-0.893111	-0.635099	0	1	0	5e-302	-37.1465	28.3838
172	0.202758	0.167262	0.238255	4.29075e-29	2	89.469	4.29075e-29	11.1955	2.26997
521	-0.420082	-0.491063	-0.349101	0	1	0	5e-302	-37.1465	15.6045
316	-0.33359	-0.3903	-0.27688	0	1	0	5e-302	-37.1465	12.3917
619.1	-0.268009	-0.320012	-0.216006	5.45835e-24	2	97.1394	5.45835e-24	-10.1012	2.70721
289.4	-0.1702	-0.200982	-0.139417	2.29902e-27	2	96.2429	2.29902e-27	-10.837	1.84445
483	-0.205859	-0.240998	-0.17072	0	1	0	5e-302	-37.1465	7.64694
535.9	-0.286987	-0.335987	-0.237987	0	1	0	5e-302	-37.1465	10.6606
428	0.316727	0.262567	0.370887	0	1	0	5e-302	37.1465	11.7653
687	-0.15888	-0.18538	-0.13238	6.99561e-32	3	0	6.99561e-32	-11.7508	1.86697
525	-0.191619	-0.232261	-0.150977	2.44405e-20	2	98.1123	2.44405e-20	-9.24091	1.77073
740.9	0.159025	0.131051	0.186998	7.82415e-29	2	76.175	7.82415e-29	11.1421	1.77187
705	-0.293972	-0.344855	-0.243089	0	1	0	5e-302	-37.1465	10.92
476	-0.121397	-0.146615	-0.0961798	3.9005e-21	3	94.9269	3.9005e-21	-9.43525	1.14542
770	-0.180805	-0.210321	-0.151289	3.30114e-33	2	0	3.30114e-33	-12.0061	2.17076
726.1	-0.164993	-0.193836	-0.136149	3.57941e-29	2	0	3.57941e-29	-11.2115	1.84982
622.1	-0.324783	-0.381923	-0.267642	0	1	0	5e-302	-37.1465	12.0645
302.1	-0.520717	-0.612405	-0.42903	0	1	0	5e-302	-37.1465	19.3428
871.2	-0.319517	-0.375918	-0.263115	0	1	0	5e-302	-37.1465	11.8689
614.1	-0.281739	-0.327196	-0.236283	5.88921e-34	2	97.5714	5.88921e-34	-12.1479	3.42253
272.11	0.162771	0.1342	0.191342	5.97903e-29	2	0	5.97903e-29	11.166	1.81751
611.1	-0.148372	-0.176116	-0.120628	1.05011e-25	2	94.1214	1.05011e-25	-10.4815	1.55517
395	0.213454	0.175688	0.25122	0	1	0	5e-302	37.1465	7.92904
624	-0.207196	-0.243859	-0.170532	0	1	0	5e-302	-37.1465	7.69659
562	0.161999	0.13177	0.192228	8.32097e-26	2	92.7241	8.32097e-26	10.5035	1.70156
303.4	-0.534254	-0.629449	-0.439059	0	1	0	5e-302	-37.1465	19.8457
317	-0.276039	-0.313314	-0.238765	9.78765e-48	2	87.1017	9.78765e-48	-14.5146	4.00661
686	-0.196421	-0.23214	-0.160701	4.38165e-27	2	92.557	4.38165e-27	-10.7778	2.11699
622.2	0.129008	0.0955309	0.162485	4.25501e-14	2	99.6321	4.25501e-14	7.55295	0.974391
617	-0.240831	-0.28291	-0.198753	3.33649e-29	2	0	3.33649e-29	-11.2178	2.70159
296.22	-0.158445	-0.187362	-0.129528	6.65274e-27	2	52.7433	6.65274e-27	-10.7393	1.7016
340.1	-0.313933	-0.371608	-0.256258	0	1	0	5e-302	-37.1465	11.6615
523	-0.336614	-0.39911	-0.274119	4.72613e-26	2	90.8022	4.72613e-26	-10.5568	3.55356
479	-0.185655	-0.219853	-0.151456	0	1	0	5e-302	-37.1465	6.89642
706	-0.164409	-0.194955	-0.133863	5.11742e-26	2	42.1291	5.11742e-26	-10.5493	1.7344
738.4	0.258486	0.210468	0.306503	0	1	0	5e-302	37.1465	9.60183
619.3	-0.0351785	-0.070928	0.000571009	0.0537733	2	99.232	0.0537733	-1.92866	0.0678474
740.2	0.162339	0.122695	0.201983	1.00772e-15	2	98.2681	1.00772e-15	8.02591	1.30292
362	0.149084	0.114416	0.183751	3.49739e-17	2	97.4948	3.49739e-17	8.42863	1.25657
562.1	0.15591	0.125148	0.186673	2.97753e-23	2	92.0604	2.97753e-23	9.93346	1.54873
798	-0.14938	-0.170931	-0.127829	4.8883e-42	3	0	4.8883e-42	-13.5854	2.02939
720	0.0436811	0.0193029	0.0680593	0.000444941	2	99.1551	0.000444941	3.51188	0.153403
317.1	-0.360459	-0.428708	-0.292209	0	1	0	5e-302	-37.1465	13.3898
351	-0.168201	-0.200077	-0.136325	0	1	0	5e-302	-37.1465	6.24807
704	-0.113487	-0.140784	-0.0861889	3.69069e-16	2	97.3737	3.69069e-16	-8.1483	0.924723
526	-0.248466	-0.296236	-0.200696	0	1	0	5e-302	-37.1465	9.22963
362.21	0.463575	0.374426	0.552723	0	1	0	5e-302	37.1465	17.2202
297	-0.415326	-0.49535	-0.335303	0	1	0	5e-302	-37.1465	15.4279
291	-0.280711	-0.33508	-0.226342	0	1	0	5e-302	-37.1465	10.4274
350.2	-0.0144879	-0.0408177	0.0118419	0.280826	2	99.4137	0.280826	-1.07847	0.0156247
760	-0.142828	-0.169973	-0.115683	6.17591e-25	2	0	6.17591e-25	-10.3127	1.47294
681	-0.167963	-0.199649	-0.136277	2.77062e-25	2	0	2.77062e-25	-10.3894	1.74504
689	-0.0912894	-0.112385	-0.070194	2.22056e-17	2	96.874	2.22056e-17	-8.48163	0.774283
172.2	0.204869	0.164532	0.245205	0	1	0	5e-302	37.1465	7.61015
474.2	-0.352397	-0.429188	-0.275606	2.37659e-19	2	96.1266	2.37659e-19	-8.99434	3.16958
773	-0.135539	-0.163069	-0.108008	4.94699e-22	2	80.3701	4.94699e-22	-9.64935	1.30786
612.2	-0.255638	-0.316454	-0.194823	1.74077e-16	2	96.7724	1.74077e-16	-8.23871	2.10613
614.3	-0.584243	-0.700271	-0.468216	0	1	0	5e-302	-37.1465	21.7026
495.2	-0.260996	-0.313064	-0.208928	0	1	0	5e-302	-37.1465	9.69507
772.2	-0.240624	-0.288859	-0.192388	0	1	0	5e-302	-37.1465	8.93831
536	-0.26064	-0.313005	-0.208274	0	1	0	5e-302	-37.1465	9.68184
381.2	-0.232404	-0.279445	-0.185363	0	1	0	5e-302	-37.1465	8.63298
371.2	-0.335113	-0.403111	-0.267114	0	1	0	5e-302	-37.1465	12.4482
781.1	0.434322	0.34614	0.522504	0	1	0	5e-302	37.1465	16.1335
362.29	0.0276184	0.000411935	0.0548249	0.0466306	2	98.8824	0.0466306	1.98964	0.0549507
261.4	0.133215	0.104995	0.161436	2.19974e-20	2	82.7981	2.19974e-20	9.25217	1.23253
433.31	0.0793947	0.0412089	0.117581	4.59955e-05	2	98.8339	4.59955e-05	4.0751	0.323541
522	-0.275513	-0.342214	-0.208813	5.68782e-16	2	95.9904	5.68782e-16	-8.09582	2.23051
426.3	0.327759	0.260065	0.395453	0	1	0	5e-302	37.1465	12.1751
261	0.127647	0.0999669	0.155327	1.58991e-19	2	87.3724	1.58991e-19	9.03839	1.15372
701	-0.112732	-0.139985	-0.0854793	5.16854e-16	3	91.7389	5.16854e-16	-8.10747	0.913971
172.22	0.354458	0.28047	0.428447	0	1	0	5e-302	37.1465	13.1669
289	-0.166993	-0.200896	-0.13309	4.72538e-22	2	0	4.72538e-22	-9.65405	1.61216
687.4	-0.143564	-0.168829	-0.118299	8.28884e-29	3	0	8.28884e-29	-11.137	1.59887
523.3	-0.483875	-0.585078	-0.382673	0	1	0	5e-302	-37.1465	17.9743
627.21	-0.526542	-0.636693	-0.416391	0	1	0	5e-302	-37.1465	19.5592
535	-0.182584	-0.22084	-0.144327	0	1	0	5e-302	-37.1465	6.78234
286.2	0.272877	0.215502	0.330251	0	1	0	5e-302	37.1465	10.1364
514	0.0465695	0.0208674	0.0722716	0.000383409	3	98.0825	0.000383409	3.55125	0.16538
686.1	-0.245633	-0.295746	-0.195519	7.48018e-22	2	95.1867	7.48018e-22	-9.60685	2.35976
54	-0.231313	-0.28003	-0.182596	0	1	0	5e-302	-37.1465	8.59246
427.8	0.170207	0.0991737	0.24124	2.64808e-06	2	98.5064	2.64808e-06	4.69638	0.799358
727	-0.136562	-0.163832	-0.109292	9.71108e-23	3	39.4955	9.71108e-23	-9.81492	1.34034
291.8	-0.247839	-0.301299	-0.19438	1.02347e-19	2	89.5936	1.02347e-19	-9.08643	2.25197
481	-0.255188	-0.302378	-0.207997	3.02129e-26	2	33.5317	3.02129e-26	-10.5987	2.70466
394	0.0697063	0.032715	0.106697	0.000221315	2	98.8282	0.000221315	3.69335	0.25745
536.8	-0.269383	-0.326514	-0.212252	0	1	0	5e-302	-37.1465	10.0066
371.21	-0.33359	-0.404527	-0.262652	0	1	0	5e-302	-37.1465	12.3917
526.4	-0.273751	-0.332101	-0.215402	0	1	0	5e-302	-37.1465	10.1689
380.4	0.177767	0.13971	0.215825	0	1	0	5e-302	37.1465	6.60343
1000	-0.336086	-0.40422	-0.267951	4.12925e-22	2	70.1359	4.12925e-22	-9.66786	3.24923
512.2	-0.201512	-0.244744	-0.158279	0	1	0	5e-302	-37.1465	7.48545
704.8	-0.262594	-0.319076	-0.206113	0	1	0	5e-302	-37.1465	9.75445
220	-0.0802513	-0.127702	-0.0328002	0.000917168	2	98.5972	0.000917168	-3.31478	0.266015
401.22	0.120945	0.0698517	0.172039	3.49245e-06	2	98.7429	3.49245e-06	4.6395	0.561126
912	-0.236002	-0.287947	-0.184056	0	1	0	5e-302	-37.1465	8.76663
292.2	0.109392	0.0416895	0.177095	0.00154097	2	98.889	0.00154097	3.16686	0.346429
578	-0.170301	-0.207892	-0.132709	0	1	0	5e-302	-37.1465	6.32607
389.1	0.106685	0.0749122	0.138458	4.6704e-11	2	97.693	4.6704e-11	6.58108	0.702102
279	-0.221183	-0.270453	-0.171914	0	1	0	5e-302	-37.1465	8.21617
276.12	0.00748743	-0.0196542	0.0346291	0.588725	2	98.9628	0.588725	0.540685	0.00404834
443.9	0.282087	0.218943	0.345231	0	1	0	5e-302	37.1465	10.4785
949	-0.180083	-0.218245	-0.14192	2.26953e-20	2	0	2.26953e-20	-9.24883	1.66555
591	-0.12919	-0.15796	-0.100421	1.35271e-18	2	0	1.35271e-18	-8.80127	1.13704
293	-0.18089	-0.219901	-0.141879	1.00763e-19	2	26.2877	1.00763e-19	-9.08812	1.64395
795	-0.401262	-0.49208	-0.310444	0	1	0	5e-302	-37.1465	14.9055
599.3	-0.134887	-0.16448	-0.105294	4.12327e-19	2	0	4.12327e-19	-8.93361	1.20503
621	0.00958309	-0.0411731	0.0603393	0.711342	2	99.1904	0.711342	0.370054	0.00354626
240	-0.162049	-0.214137	-0.109961	1.07727e-09	2	97.3369	1.07727e-09	-6.09752	0.988097
726.4	-0.261121	-0.321183	-0.201059	0	1	0	5e-302	-37.1465	9.69971
724	-0.190157	-0.233901	-0.146412	0	1	0	5e-302	-37.1465	7.06365
172.1	0.197993	0.152316	0.243671	0	1	0	5e-302	37.1465	7.35475
522.5	-0.26268	-0.321138	-0.204222	1.28488e-18	2	91.2644	1.28488e-18	-8.80705	2.31344
414	-0.00547798	-0.0408843	0.0299283	0.761706	2	99.0238	0.761706	-0.303241	0.00166115
738	0.183826	0.140569	0.227083	0	1	0	5e-302	37.1465	6.82849
726.3	-0.2307	-0.28506	-0.17634	0	1	0	5e-302	-37.1465	8.56969
586	0.0963463	0.0604596	0.132233	1.42503e-07	2	98.1976	1.42503e-07	5.26199	0.506973
731	0.305976	0.233815	0.378136	0	1	0	5e-302	37.1465	11.3659
297.1	-0.52485	-0.649218	-0.400483	2.22045e-16	1	0	2.22045e-16	-8.20954	4.30878
395.1	0.18227	0.138953	0.225588	2.22045e-16	1	0	2.22045e-16	8.20954	1.49635
415.2	0.28723	0.218791	0.355668	2.22045e-16	1	0	2.22045e-16	8.20954	2.35802
727.1	-0.147662	-0.182889	-0.112436	2.22045e-16	1	0	2.22045e-16	-8.20954	1.21224
1004	-0.276262	-0.337156	-0.215369	6.00351e-19	2	87.4376	6.00351e-19	-8.89197	2.45652
496	0.175742	0.133469	0.218015	4.44089e-16	1	0	4.44089e-16	8.12589	1.42806
512.8	-0.112232	-0.13952	-0.0849442	7.56249e-16	2	27.1248	7.56249e-16	-8.06108	0.904713
523.1	-0.505118	-0.627022	-0.383213	4.44089e-16	1	0	4.44089e-16	-8.12589	4.10453
426.32	0.0445575	0.0030821	0.0860329	0.0352381	2	98.4377	0.0352381	2.10561	0.0938208
801	-0.18015	-0.223763	-0.136538	6.66134e-16	1	0	6.66134e-16	-8.07657	1.455
528.12	-0.411713	-0.511385	-0.31204	6.66134e-16	1	0	6.66134e-16	-8.07657	3.32523
681.1	-0.181939	-0.231323	-0.132556	5.16091e-13	2	92.3752	5.16091e-13	-7.22099	1.31378
218.2	-0.147904	-0.235505	-0.0603036	0.000935674	2	98.4245	0.000935674	-3.30919	0.489443
250	0.105074	0.077527	0.13262	7.65855e-14	2	92.7707	7.65855e-14	7.47606	0.785537
380.1	-0.203121	-0.251192	-0.155049	1.21558e-16	2	28.7773	1.21558e-16	-8.28157	1.68216
496.3	0.357948	0.270745	0.445151	8.88178e-16	1	0	8.88178e-16	8.0414	2.8784
610.4	-0.100938	-0.147337	-0.0545389	2.00998e-05	2	97.9625	2.00998e-05	-4.26378	0.430376
705.8	-0.213679	-0.26572	-0.161638	8.44744e-16	2	75.0523	8.44744e-16	-8.04754	1.71959
415	0.00287893	-0.0268763	0.0326341	0.849596	2	98.8748	0.849596	0.189634	0.000545942
586.2	0.24394	0.184201	0.303679	1.11022e-15	1	0	1.11022e-15	8.01402	1.95494
362.26	0.294731	0.222419	0.367044	1.33227e-15	1	0	1.33227e-15	7.99157	2.35537
574	-0.188511	-0.234854	-0.142169	1.55431e-15	1	0	1.55431e-15	-7.97255	1.50292
427.7	-0.145557	-0.176903	-0.114211	8.9271e-20	2	83.0133	8.9271e-20	-9.10128	1.32476
345	-0.205112	-0.243471	-0.166754	1.06256e-25	2	83.0835	1.06256e-25	-10.4804	2.14966
274.21	0.166803	0.0916719	0.241935	1.35255e-05	2	97.9287	1.35255e-05	4.35143	0.725832
769	-0.324706	-0.405344	-0.244067	2.88658e-15	1	0	2.88658e-15	-7.89571	2.56378
426.2	0.352804	0.265078	0.44053	3.10862e-15	1	0	3.10862e-15	7.88647	2.78238
514.2	0.178766	0.134302	0.22323	3.33067e-15	1	0	3.33067e-15	7.87785	1.40829
564.1	-0.163232	-0.203898	-0.122567	3.55271e-15	1	0	3.55271e-15	-7.86978	1.2846
290.1	-0.017292	-0.0566298	0.0220457	0.388931	2	98.6729	0.388931	-0.861558	0.0148981
528	-0.112442	-0.14772	-0.0771645	4.18144e-10	2	95.5987	4.18144e-10	-6.2471	0.702437
781	0.0426696	0.0107094	0.0746298	0.00887796	2	98.8459	0.00887796	2.61672	0.111654
737.3	0.0493351	0.0137442	0.084926	0.00659076	2	98.4208	0.00659076	2.71684	0.134036
558	-0.136389	-0.15587	-0.116909	7.47226e-43	2	45.8618	7.47226e-43	-13.7222	1.87156
578.2	-0.177141	-0.213862	-0.14042	3.23645e-21	2	61.917	3.23645e-21	-9.4548	1.67483
530.9	-0.141276	-0.17753	-0.105022	2.21255e-14	2	92.2641	2.21255e-14	-7.63763	1.07901
279.2	-0.41762	-0.523081	-0.312158	8.43769e-15	1	0	8.43769e-15	-7.76083	3.24107
428.1	-0.00739476	-0.0430586	0.0282691	0.684455	2	98.9034	0.684455	-0.406391	0.00300516
565	-0.140643	-0.166597	-0.114689	2.3844e-26	2	66.7129	2.3844e-26	-10.6208	1.49374
724.2	-0.406011	-0.509244	-0.302778	1.26565e-14	1	0	1.26565e-14	-7.70924	3.13004
274.2	0.38478	0.286106	0.483454	2.13163e-14	1	0	2.13163e-14	7.64243	2.94065
737	0.195222	0.145098	0.245347	2.28706e-14	1	0	2.28706e-14	7.63336	1.4902
395.3	0.303973	0.225502	0.382443	3.13083e-14	1	0	3.13083e-14	7.59279	2.308
427.9	-0.119427	-0.150848	-0.0880047	9.38156e-14	2	48.094	9.38156e-14	-7.44933	0.889648
327.1	-0.206973	-0.260634	-0.153313	4.04121e-14	1	0	4.04121e-14	-7.55966	1.56465
41	-0.160588	-0.202305	-0.118872	4.52971e-14	1	0	4.52971e-14	-7.5448	1.21161
426.91	-0.0299504	-0.07495	0.0150492	0.192066	2	98.6322	0.192066	-1.30449	0.03907
215	-0.15146	-0.202288	-0.100632	5.20766e-09	2	95.5484	5.20766e-09	-5.8404	0.884588
574.12	-0.30638	-0.386899	-0.225861	8.79297e-14	1	0	8.79297e-14	-7.45787	2.28494
722.1	-0.162176	-0.204887	-0.119464	9.90319e-14	1	0	9.90319e-14	-7.44219	1.20694
350	0.124305	0.0915396	0.157069	1.03917e-13	1	0	1.03917e-13	7.43583	0.924307
433.21	0.0297061	-0.0115822	0.0709944	0.158494	2	98.4519	0.158494	1.41016	0.0418903
574.3	-0.318683	-0.403303	-0.234064	1.56541e-13	1	0	1.56541e-13	-7.38148	2.35235
345.3	-0.161147	-0.204921	-0.117373	5.38185e-13	2	93.3884	5.38185e-13	-7.21529	1.16272
327	-0.105577	-0.132245	-0.0789096	8.52611e-15	3	0	8.52611e-15	-7.75951	0.819227
528.1	-0.293217	-0.371208	-0.215226	1.72085e-13	1	0	1.72085e-13	-7.36887	2.16068
371	-0.140499	-0.178003	-0.102994	2.0961e-13	1	0	2.0961e-13	-7.34252	1.03161
523.31	-0.503795	-0.638565	-0.369026	2.35589e-13	1	0	2.35589e-13	-7.32687	3.69124
1010.1	-0.304765	-0.386306	-0.223223	2.3781e-13	1	0	2.3781e-13	-7.32561	2.23259
613.1	-0.185897	-0.24581	-0.125983	1.19245e-09	2	94.6247	1.19245e-09	-6.08126	1.13048
433.2	0.0129343	-0.0225151	0.0483836	0.474532	2	98.4303	0.474532	0.715125	0.00924963
379.9	-0.244553	-0.310935	-0.178172	5.1692e-13	1	0	5.1692e-13	-7.22078	1.76586
704.2	-0.3789	-0.48201	-0.27579	5.91527e-13	1	0	5.91527e-13	-7.20242	2.729
338.1	-0.123237	-0.15555	-0.0909247	7.71192e-14	2	0	7.71192e-14	-7.47514	0.921215
578.8	-0.170866	-0.217553	-0.124179	7.32081e-13	1	0	7.32081e-13	-7.17331	1.22567
362.27	0.320476	0.23255	0.408402	9.07274e-13	1	0	9.07274e-13	7.14389	2.28944
724.8	-0.248749	-0.317059	-0.18044	9.51683e-13	1	0	9.51683e-13	-7.13732	1.7754
916	-0.108755	-0.136246	-0.0812648	8.91605e-15	2	30.0051	8.91605e-15	-7.75383	0.84327
569.2	-0.204826	-0.271458	-0.138194	1.69217e-09	2	93.1734	1.69217e-09	-6.0249	1.23405
418	-0.102495	-0.129886	-0.0751046	2.23106e-13	2	0	2.23106e-13	-7.33417	0.751716
447	0.141257	0.0877059	0.194808	2.34112e-07	2	96.0907	2.34112e-07	5.16999	0.730297
274	0.230858	0.166627	0.295089	1.85962e-12	1	0	1.85962e-12	7.04462	1.62631
830	-0.141716	-0.180587	-0.102844	8.96293e-13	2	74.7802	8.96293e-13	-7.14556	1.01264
300.3	-0.488021	-0.624126	-0.351916	2.09766e-12	1	0	2.09766e-12	-7.02783	3.42973
172.21	0.183828	0.132474	0.235183	2.28217e-12	1	0	2.28217e-12	7.01606	1.28975
496.1	-0.147587	-0.187995	-0.107178	8.15353e-13	2	99.4077	8.15353e-13	-7.15855	1.05651
765	-0.156129	-0.199954	-0.112305	2.89591e-12	1	0	2.89591e-12	-6.98269	1.0902
574.1	-0.177154	-0.226995	-0.127313	3.24762e-12	1	0	3.24762e-12	-6.96657	1.23415
244	0.100551	0.0713267	0.129776	1.54551e-11	2	68.1655	1.54551e-11	6.74356	0.678073
752	-0.458845	-0.58814	-0.32955	3.50853e-12	1	0	3.50853e-12	-6.95569	3.19158
251	-0.283412	-0.36342	-0.203404	3.84071e-12	1	0	3.84071e-12	-6.94292	1.96771
526.41	-0.261901	-0.336018	-0.187784	4.33231e-12	1	0	4.33231e-12	-6.92589	1.8139
1009	-0.0989478	-0.127542	-0.0703536	1.18281e-11	2	47.883	1.18281e-11	-6.7823	0.671093
743.2	0.147302	0.0897598	0.204843	5.23958e-07	2	96.4754	5.23958e-07	5.01733	0.73906
389	0.0235072	0.00217051	0.0448438	0.0308234	3	96.5717	0.0308234	2.15934	0.0507601
416	-0.0290791	-0.0606096	0.0024514	0.0706715	2	98.8434	0.0706715	-1.80758	0.0525629
871	-0.137365	-0.176468	-0.0982616	5.76872e-12	1	0	5.76872e-12	-6.88525	0.945791
251.1	-0.28433	-0.365337	-0.203323	6.00586e-12	1	0	6.00586e-12	-6.87951	1.95605
523.32	-0.199961	-0.274632	-0.12529	1.53282e-07	2	95.5829	1.53282e-07	-5.24857	1.04951
426.9	0.386542	0.276097	0.496986	6.89782e-12	1	0	6.89782e-12	6.85976	2.65158
695	-0.114552	-0.14705	-0.0820545	4.88997e-12	2	0	4.88997e-12	-6.90873	0.791411
766	-0.16007	-0.197629	-0.122511	6.64996e-17	2	0	6.64996e-17	-8.35309	1.33708
368.9	-0.235502	-0.288316	-0.182688	2.33821e-18	2	0	2.33821e-18	-8.73966	2.05821
619.5	-0.156963	-0.201229	-0.112698	3.65447e-12	2	82.9756	3.65447e-12	-6.94994	1.09089
293.1	-0.13996	-0.181584	-0.0983358	4.38914e-11	2	70.9403	4.38914e-11	-6.59031	0.92238
244.4	0.0977153	0.0680747	0.127356	1.03767e-10	2	57.3932	1.03767e-10	6.46136	0.631374
526.9	-0.433614	-0.561793	-0.305435	3.34701e-11	1	0	3.34701e-11	-6.63043	2.87505
579	-0.105577	-0.138001	-0.073152	1.75067e-10	2	79.7393	1.75067e-10	-6.38176	0.673765
594.8	-0.217849	-0.293862	-0.141835	1.94187e-08	2	93.8391	1.94187e-08	-5.6171	1.22368
472	-0.116332	-0.154147	-0.0785169	1.64466e-09	2	86.264	1.64466e-09	-6.0295	0.701424
681.2	-0.1876	-0.256793	-0.118406	1.0729e-07	2	93.5043	1.0729e-07	-5.31392	0.996892
303.3	-0.282258	-0.366593	-0.197923	5.38669e-11	1	0	5.38669e-11	-6.55984	1.85157
805	0.0101238	-0.0303996	0.0506473	0.624381	2	98.2883	0.624381	0.489651	0.00495716
742	-0.125176	-0.162667	-0.087685	5.98499e-11	1	0	5.98499e-11	-6.54411	0.819165
733.6	-0.36885	-0.479485	-0.258216	6.37979e-11	1	0	6.37979e-11	-6.53456	2.41027
427.1	0.177975	0.124544	0.231406	6.63773e-11	1	0	6.63773e-11	6.52862	1.16193
557	-0.168907	-0.227139	-0.110675	1.30779e-08	2	89.5646	1.30779e-08	-5.68504	0.960243
938.1	-0.402242	-0.524223	-0.280261	1.02483e-10	1	0	1.02483e-10	-6.46324	2.59979
355	-0.191347	-0.249455	-0.13324	1.08749e-10	1	0	1.08749e-10	-6.45426	1.23501
585.1	0.187351	0.129998	0.244704	1.52771e-10	1	0	1.52771e-10	6.40258	1.19953
717	0.0248345	-0.0153417	0.0650106	0.225692	2	97.544	0.225692	1.21153	0.0300878
345.1	-0.380643	-0.497256	-0.264029	1.57713e-10	1	0	1.57713e-10	-6.39772	2.43525
540	-0.308826	-0.40355	-0.214101	1.65776e-10	1	0	1.65776e-10	-6.3901	1.97343
569	-0.105992	-0.134643	-0.0773407	4.14786e-13	2	79.2499	4.14786e-13	-7.25065	0.768511
455	-0.0607221	-0.0781023	-0.043342	7.50694e-12	3	83.4129	7.50694e-12	-6.84766	0.415804
277	-0.138455	-0.181248	-0.0956619	2.27561e-10	1	0	2.27561e-10	-6.34148	0.87801
946	-0.250834	-0.331644	-0.170024	1.17423e-09	2	87.8097	1.17423e-09	-6.08372	1.526
355.1	-0.204175	-0.26744	-0.140909	2.52514e-10	1	0	2.52514e-10	-6.32544	1.2915
695.3	-0.109622	-0.150948	-0.0682967	2.00272e-07	2	94.1238	2.00272e-07	-5.19908	0.569936
457	0.110369	0.0761211	0.144616	2.67647e-10	1	0	2.67647e-10	6.31645	0.697138
1010	-0.0948257	-0.124292	-0.0653592	2.83686e-10	1	0	2.83686e-10	-6.30744	0.598108
394.1	0.361163	0.248883	0.473443	2.88968e-10	1	0	2.88968e-10	6.30458	2.27698
742.9	-0.146893	-0.178688	-0.115098	1.36559e-19	2	77.4361	1.36559e-19	-9.05501	1.33011
525.1	-0.356717	-0.469563	-0.24387	5.80199e-10	1	0	5.80199e-10	-6.19572	2.21012
379.2	0.0746676	0.044224	0.105111	1.5313e-06	2	93.3735	1.5313e-06	4.80711	0.358935
623	0.0317762	-0.0180405	0.0815928	0.211231	2	99.0786	0.211231	1.25019	0.0397262
465.4	-0.225753	-0.297598	-0.153909	7.32961e-10	1	0	7.32961e-10	-6.1588	1.39037
594	-0.14868	-0.195997	-0.101362	7.33603e-10	1	0	7.33603e-10	-6.15867	0.91567
564	-0.095888	-0.125836	-0.0659401	3.48566e-10	2	0	3.48566e-10	-6.27548	0.601743
745	-0.127877	-0.147696	-0.108057	1.17627e-36	3	73.3967	1.17627e-36	-12.6461	1.61713
526.42	-0.277491	-0.366337	-0.188644	9.26453e-10	1	0	9.26453e-10	-6.12159	1.69869
512.1	-0.164282	-0.216961	-0.111604	9.81139e-10	1	0	9.81139e-10	-6.11245	1.00417
695.42	-0.299363	-0.376032	-0.222695	1.96393e-14	2	0	1.96393e-14	-7.65297	2.29102
508	0.166919	0.113302	0.220535	1.0483e-09	1	0	1.0483e-09	6.10188	1.01852
772	-0.0996505	-0.131875	-0.0674256	1.35379e-09	2	34.9945	1.35379e-09	-6.06088	0.60397
800.1	0.0140514	-0.0204558	0.0485586	0.424812	2	97.3117	0.424812	0.7981	0.0112144
285.2	0.1388	0.0700928	0.207508	7.51237e-05	2	95.9051	7.51237e-05	3.95945	0.549572
695.4	-0.318235	-0.420816	-0.215654	1.19848e-09	1	0	1.19848e-09	-6.08045	1.93501
395.6	0.0203241	-0.0364156	0.0770638	0.482643	2	97.5687	0.482643	0.702057	0.0142687
568.1	-0.273384	-0.361963	-0.184806	1.45539e-09	1	0	1.45539e-09	-6.04923	1.65376
80	-0.177001	-0.213848	-0.140154	4.73121e-21	2	73.7551	4.73121e-21	-9.41499	1.66647
245	-0.176768	-0.234675	-0.118861	2.1888e-09	1	0	2.1888e-09	-5.98314	1.05763
285.21	0.386911	0.259258	0.514565	2.83884e-09	1	0	2.83884e-09	5.94066	2.29851
276.1	0.0882091	0.055089	0.121329	1.78933e-07	2	90.2131	1.78933e-07	5.21999	0.460451
613.8	-0.119835	-0.157103	-0.0825676	2.93262e-10	2	0	2.93262e-10	-6.3023	0.755239
753	-0.339269	-0.452316	-0.226222	4.04818e-09	1	0	4.04818e-09	-5.88221	1.99565
411.2	0.198648	0.132451	0.264844	4.05991e-09	1	0	4.05991e-09	5.88173	1.16839
727.4	-0.0972903	-0.131518	-0.063063	2.53052e-08	2	88.0403	2.53052e-08	-5.57116	0.54202
457.2	0.351483	0.234218	0.468748	4.23381e-09	1	0	4.23381e-09	5.87479	2.06489
388	-0.178982	-0.238819	-0.119146	4.55258e-09	1	0	4.55258e-09	-5.86275	1.04933
428.3	0.281885	0.187582	0.376187	4.66403e-09	1	0	4.66403e-09	5.85874	1.65149
571	-0.122072	-0.162996	-0.0811469	5.02476e-09	1	0	5.02476e-09	-5.84635	0.713673
110	-0.108703	-0.145159	-0.0722458	5.09315e-09	1	0	5.09315e-09	-5.8441	0.635269
427.11	0.0327021	-0.00472279	0.0701271	0.0867808	2	97.3145	0.0867808	1.71263	0.0560066
696	-0.17256	-0.230892	-0.114229	6.70262e-09	1	0	6.70262e-09	-5.79821	1.00054
706.2	-0.0570125	-0.0814332	-0.0325919	4.74552e-06	2	92.629	4.74552e-06	-4.57573	0.260874
575.7	-0.274128	-0.367155	-0.1811	7.66873e-09	1	0	7.66873e-09	-5.77558	1.58325
561.1	-0.0926937	-0.121669	-0.0637187	3.60813e-10	2	0	3.60813e-10	-6.2701	0.581199
540.1	-0.196015	-0.275773	-0.116256	1.45859e-06	2	90.7309	1.45859e-06	-4.81683	0.944169
590	-0.222228	-0.297855	-0.146602	8.43793e-09	1	0	8.43793e-09	-5.75947	1.27992
571.5	-0.137461	-0.167671	-0.107251	4.73366e-19	2	21.9255	4.73366e-19	-8.91833	1.22592
1001	-0.187664	-0.251858	-0.12347	1.00518e-08	1	0	1.00518e-08	-5.72985	1.07529
331	0.138409	0.0541303	0.222688	0.00128727	2	95.7171	0.00128727	3.2188	0.445512
253	-0.296108	-0.397866	-0.19435	1.17409e-08	1	0	1.17409e-08	-5.70345	1.68884
357	0.0319746	-0.00316502	0.0671142	0.0745163	2	97.8457	0.0745163	1.78343	0.0570244
327.4	-0.0980944	-0.129707	-0.0664816	1.18864e-09	2	43.4683	1.18864e-09	-6.08177	0.596587
333.1	0.130598	0.0701051	0.191092	2.32291e-05	2	93.1484	2.32291e-05	4.23135	0.552608
755	-0.240512	-0.323521	-0.157502	1.3557e-08	1	0	1.3557e-08	-5.67889	1.36584
245.21	-0.181511	-0.244272	-0.118751	1.44005e-08	1	0	1.44005e-08	-5.66856	1.02891
724.1	-0.195893	-0.263806	-0.12798	1.57126e-08	1	0	1.57126e-08	-5.6536	1.1075
709.7	-0.321553	-0.433119	-0.209987	1.61325e-08	1	0	1.61325e-08	-5.64906	1.81647
871.3	-0.313807	-0.422906	-0.204707	1.72417e-08	1	0	1.72417e-08	-5.63762	1.76912
681.7	-0.161676	-0.221398	-0.101954	1.12141e-07	2	83.2948	1.12141e-07	-5.30586	0.857831
426	0.0896261	0.0560295	0.123223	1.70785e-07	2	81.323	1.70785e-07	5.22861	0.46862
550.2	0.115018	0.0747976	0.155238	2.08256e-08	1	0	2.08256e-08	5.605	0.644676
1005	-0.113629	-0.144207	-0.083051	3.25787e-13	2	77.1751	3.25787e-13	-7.28329	0.827593
817	-0.234266	-0.316415	-0.152118	2.27861e-08	1	0	2.27861e-08	-5.5894	1.30941
513	-0.179889	-0.243015	-0.116763	2.3323e-08	1	0	2.3323e-08	-5.58535	1.00474
536.3	-0.320051	-0.432543	-0.20756	2.45532e-08	1	0	2.45532e-08	-5.57641	1.78474
599.4	0.096921	0.0626042	0.131238	3.1012e-08	1	0	3.1012e-08	5.53563	0.536518
915	-0.102244	-0.127636	-0.076853	2.96808e-15	2	0	2.96808e-15	-7.89224	0.806937
389.3	0.115174	0.0354807	0.194867	0.00461751	2	95.6415	0.00461751	2.83257	0.326238
913	-0.238034	-0.322473	-0.153594	3.29117e-08	1	0	3.29117e-08	-5.5252	1.31518
716.9	0.0998002	0.0643084	0.135292	3.56063e-08	1	0	3.56063e-08	5.51136	0.550035
278.3	-0.3302	-0.447691	-0.21271	3.61994e-08	1	0	3.61994e-08	-5.50846	1.81889
440.2	-0.0700494	-0.143515	0.00341583	0.0616459	2	98.8735	0.0616459	-1.86883	0.130911
703.1	-0.183846	-0.237056	-0.130636	1.27119e-11	2	0	1.27119e-11	-6.77188	1.24498
353.1	-0.372352	-0.505923	-0.238782	4.65883e-08	1	0	4.65883e-08	-5.46386	2.03448
705.1	-0.321525	-0.436939	-0.206112	4.75367e-08	1	0	4.75367e-08	-5.46029	1.75562
687.2	-0.114655	-0.155918	-0.0733922	5.14712e-08	1	0	5.14712e-08	-5.44615	0.624429
276.13	0.00346379	-0.0405913	0.0475189	0.877531	2	98.1756	0.877531	0.1541	0.000533772
245.2	-0.172098	-0.234067	-0.110128	5.23325e-08	1	0	5.23325e-08	-5.4432	0.936761
364.5	0.152333	0.0818847	0.222782	2.25424e-05	2	91.5614	2.25424e-05	4.2381	0.645603
362.4	0.0414552	-0.0139694	0.0968798	0.142657	2	96.7481	0.142657	1.46597	0.060772
362.23	0.284684	0.181514	0.387855	6.36156e-08	1	0	6.36156e-08	5.40833	1.53967
386.3	-0.139673	-0.201876	-0.0774701	1.07759e-05	2	90.1213	1.07759e-05	-4.40099	0.614699
540.11	-0.0874207	-0.148175	-0.0266663	0.0047989	2	95.0251	0.0047989	-2.82023	0.246547
594.1	-0.125119	-0.162746	-0.0874919	7.15464e-11	2	0	7.15464e-11	-6.51738	0.815446
624.9	-0.115282	-0.158032	-0.0725314	1.25429e-07	1	0	1.25429e-07	-5.2854	0.60931
277.5	-0.22433	-0.307717	-0.140942	1.34344e-07	1	0	1.34344e-07	-5.27282	1.18285
250.4	0.0686843	0.0397664	0.0976022	3.23654e-06	2	92.2875	3.23654e-06	4.65521	0.31974
318	-0.0893676	-0.12262	-0.0561156	1.38169e-07	1	0	1.38169e-07	-5.26767	0.470759
938	-0.105797	-0.145187	-0.0664068	1.40719e-07	1	0	1.40719e-07	-5.26431	0.556948
275.6	0.160197	0.100272	0.220121	1.60849e-07	1	0	1.60849e-07	5.23969	0.839381
703	-0.112552	-0.15493	-0.0701732	1.93465e-07	1	0	1.93465e-07	-5.20551	0.585889
577.3	0.261512	0.162757	0.360266	2.09981e-07	1	0	2.09981e-07	5.19028	1.35732
288.11	-0.208322	-0.287102	-0.129542	2.18436e-07	1	0	2.18436e-07	-5.18292	1.07972
367.8	-0.106186	-0.153273	-0.0590986	9.87471e-06	2	86.4648	9.87471e-06	-4.4199	0.46933
727.2	-0.235936	-0.325262	-0.146609	2.25627e-07	1	0	2.25627e-07	-5.17688	1.22141
721.1	0.0803173	0.0497774	0.110857	2.54126e-07	1	0	2.54126e-07	5.15463	0.414006
427.6	0.0761478	0.033572	0.118724	0.000455851	2	93.6264	0.000455851	3.50544	0.266932
263	-0.173438	-0.239828	-0.107048	3.05021e-07	1	0	3.05021e-07	-5.12032	0.888059
216	-0.0386583	-0.0595636	-0.017753	0.000289642	3	85.4879	0.000289642	-3.62439	0.140113
277.51	-0.290866	-0.402267	-0.179466	3.09536e-07	1	0	3.09536e-07	-5.11755	1.48852
519	-0.114633	-0.158545	-0.0707203	3.11183e-07	1	0	3.11183e-07	-5.11655	0.586524
721	0.0791273	0.0488012	0.109453	3.15311e-07	1	0	3.15311e-07	5.11406	0.404662
259	-0.227464	-0.314754	-0.140173	3.26609e-07	1	0	3.26609e-07	-5.10741	1.16175
110.2	-0.273298	-0.378548	-0.168049	3.5907e-07	1	0	3.5907e-07	-5.08947	1.39094
443.1	-0.142102	-0.183638	-0.100565	2.0098e-11	2	46.0911	2.0098e-11	-6.70531	0.952835
871.1	-0.201844	-0.279833	-0.123856	3.92162e-07	1	0	3.92162e-07	-5.07272	1.0239
250.22	0.191159	0.117254	0.265064	3.9859e-07	1	0	3.9859e-07	5.06963	0.969104
110.12	-0.187922	-0.260592	-0.115251	4.01071e-07	1	0	4.01071e-07	-5.06845	0.952473
365	0.04498	0.0204446	0.0695154	0.000326714	2	92.4581	0.000326714	3.59314	0.16162
568	-0.202675	-0.28152	-0.12383	4.6977e-07	1	0	4.6977e-07	-5.03827	1.02113
698	-0.113901	-0.150365	-0.0774372	9.22587e-10	2	26.2653	9.22587e-10	-6.12226	0.697332
610.8	-0.107168	-0.161131	-0.0532043	9.92745e-05	2	90.0528	9.92745e-05	-3.89236	0.417135
686.2	-0.272694	-0.379826	-0.165562	6.06995e-07	1	0	6.06995e-07	-4.98898	1.36046
41.2	-0.131847	-0.185094	-0.0786003	1.21513e-06	2	90.1175	1.21513e-06	-4.85315	0.639875
562.2	0.149021	0.0903411	0.2077	6.43951e-07	1	0	6.43951e-07	4.97755	0.741757
365.11	0.0783577	0.0316696	0.125046	0.00100382	2	93.3182	0.00100382	3.28945	0.257754
242	-0.067878	-0.105347	-0.0304093	0.000384282	2	91.8751	0.000384282	-3.55065	0.241011
353	-0.197015	-0.250309	-0.143721	4.30866e-13	2	0	4.30866e-13	-7.24549	1.42747
285.1	0.159741	0.0967265	0.222756	6.74515e-07	1	0	6.74515e-07	4.96856	0.793684
327.5	-0.321475	-0.448346	-0.194605	6.82046e-07	1	0	6.82046e-07	-4.96641	1.59658
470	-0.148841	-0.187721	-0.10996	6.23423e-14	2	0	6.23423e-14	-7.50307	1.11676
335	-0.123238	-0.184496	-0.0619801	8.04584e-05	2	90.8704	8.04584e-05	-3.94303	0.485932
580.3	-0.335775	-0.469682	-0.201868	8.8904e-07	1	0	8.8904e-07	-4.91473	1.65024
592.2	-0.335306	-0.469213	-0.201398	9.20774e-07	1	0	9.20774e-07	-4.90786	1.64563
574.11	-0.117206	-0.168075	-0.0663363	6.30584e-06	2	90.9979	6.30584e-06	-4.51587	0.529285
702	0.070461	0.0426661	0.0982558	6.74456e-07	2	0	6.74456e-07	4.96858	0.350091
270.32	0.0954336	0.0225801	0.168287	0.0102455	2	94.6947	0.0102455	2.56743	0.245019
426.21	0.0492873	-0.0065201	0.105095	0.0834559	2	95.3106	0.0834559	1.73098	0.0853152
716	0.0859055	0.0512857	0.120525	1.15306e-06	1	0	1.15306e-06	4.86354	0.417805
575	-0.138097	-0.193771	-0.0824239	1.16351e-06	1	0	1.16351e-06	-4.86175	0.671396
110.1	-0.0928383	-0.130372	-0.0553044	1.24732e-06	1	0	1.24732e-06	-4.84797	0.450077
478	-0.192076	-0.26989	-0.114262	1.31103e-06	1	0	1.31103e-06	-4.83807	0.929277
426.31	0.00358434	-0.04369	0.0508587	0.881866	2	96.6448	0.881866	0.148604	0.000532647
173	0.0808845	0.0454219	0.116347	7.80864e-06	2	67.5944	7.80864e-06	4.47036	0.361583
250.42	0.0529164	0.022851	0.0829819	0.000561387	3	89.8895	0.000561387	3.44961	0.182541
561.2	-0.114277	-0.14614	-0.0824131	2.07606e-12	2	29.1285	2.07606e-12	-7.02928	0.803282
272.12	-0.154627	-0.218645	-0.0906089	2.20018e-06	1	0	2.20018e-06	-4.73411	0.732022
585.34	0.327829	0.191628	0.46403	2.38606e-06	1	0	2.38606e-06	4.71763	1.54658
930	-0.194767	-0.275826	-0.113707	2.4845e-06	1	0	2.4845e-06	-4.7094	0.917233
165.1	-0.144186	-0.182933	-0.105439	3.02198e-13	2	98.4086	3.02198e-13	-7.29341	1.05161
427.61	0.197205	0.114965	0.279444	2.60214e-06	1	0	2.60214e-06	4.69996	0.926854
369.2	-0.235998	-0.33464	-0.137355	2.7424e-06	1	0	2.7424e-06	-4.68923	1.10665
337	-0.261636	-0.371452	-0.151821	3.01626e-06	1	0	3.01626e-06	-4.66971	1.22177
723	-0.164865	-0.234198	-0.0955319	3.15242e-06	1	0	3.15242e-06	-4.66063	0.768374
594.3	-0.142648	-0.200733	-0.0845638	1.48371e-06	2	73.5156	1.48371e-06	-4.81342	0.686627
70	-0.166001	-0.236135	-0.0958665	3.4989e-06	1	0	3.4989e-06	-4.63912	0.770098
195	0.0791369	0.0291761	0.129098	0.00190574	2	92.5012	0.00190574	3.10454	0.245684
286.7	-0.189014	-0.269143	-0.108885	3.77517e-06	1	0	3.77517e-06	-4.62339	0.873886
288.1	-0.131983	-0.18805	-0.0759164	3.95168e-06	1	0	3.95168e-06	-4.61391	0.608958
801.1	-0.200813	-0.286134	-0.115491	3.96833e-06	1	0	3.96833e-06	-4.61303	0.926355
295	-0.235043	-0.335221	-0.134865	4.25237e-06	1	0	4.25237e-06	-4.59865	1.08088
130	-0.216668	-0.309311	-0.124024	4.56399e-06	1	0	4.56399e-06	-4.58389	0.993181
272.9	-0.164228	-0.22537	-0.103086	1.40586e-07	2	0	1.40586e-07	-5.26448	0.864574
338	-0.0631496	-0.0903468	-0.0359524	5.34239e-06	2	0	5.34239e-06	-4.55087	0.287386
614.54	-0.309039	-0.441393	-0.176684	4.72933e-06	1	0	4.72933e-06	-4.57645	1.4143
242.1	-0.133792	-0.203211	-0.0643739	0.00015841	2	86.9815	0.00015841	-3.7775	0.5054
442	0.174701	0.0998031	0.2496	4.83715e-06	1	0	4.83715e-06	4.57173	0.798687
277.7	-0.211945	-0.303184	-0.120707	5.28784e-06	1	0	5.28784e-06	-4.55303	0.964994
250.1	-0.213527	-0.264848	-0.162205	3.50304e-16	2	0	3.50304e-16	-8.15461	1.74123
255	-0.170812	-0.235369	-0.106255	2.14966e-07	2	0	2.14966e-07	-5.18591	0.885817
195.1	0.158076	0.0896334	0.226519	5.98761e-06	1	0	5.98761e-06	4.52683	0.715584
291.4	-0.210932	-0.30227	-0.119595	6.00065e-06	1	0	6.00065e-06	-4.52637	0.954757
756	-0.137386	-0.197452	-0.0773206	7.35861e-06	1	0	7.35861e-06	-4.48304	0.615909
255.2	-0.291329	-0.418758	-0.163899	7.43146e-06	1	0	7.43146e-06	-4.48094	1.30543
327.3	-0.099222	-0.126396	-0.0720482	8.27125e-13	2	85.7315	8.27125e-13	-7.15658	0.71009
696.41	-0.164442	-0.205224	-0.12366	2.72205e-15	2	0	2.72205e-15	-7.90303	1.29959
519.9	-0.14468	-0.208767	-0.0805932	9.65259e-06	1	0	9.65259e-06	-4.42481	0.640183
620	-0.294605	-0.425159	-0.16405	9.74004e-06	1	0	9.74004e-06	-4.42287	1.303
165	-0.0843639	-0.139792	-0.0289354	0.00285319	2	98.0401	0.00285319	-2.98313	0.251668
741	-0.0662356	-0.0938753	-0.038596	2.64192e-06	3	0	2.64192e-06	-4.69686	0.311099
174	0.085069	0.0471209	0.123017	1.114e-05	1	0	1.114e-05	4.39377	0.373774
110.13	-0.187922	-0.272003	-0.10384	1.18368e-05	1	0	1.18368e-05	-4.38057	0.823204
292.11	0.27405	0.151271	0.396829	1.2153e-05	1	0	1.2153e-05	4.37482	1.19892
502	-0.0519255	-0.102016	-0.00183514	0.0421769	2	97.8884	0.0421769	-2.03177	0.105501
191	-0.286509	-0.415051	-0.157967	1.25005e-05	1	0	1.25005e-05	-4.36867	1.25166
394.7	-0.0142686	-0.0541156	0.0255785	0.482784	2	96.5759	0.482784	-0.701831	0.0100141
214	-0.0855448	-0.130673	-0.0404163	0.000202987	2	80.4401	0.000202987	-3.71527	0.317822
742.8	-0.190087	-0.270534	-0.10964	3.63599e-06	2	72.9891	3.63599e-06	-4.63117	0.880325
448	-0.175173	-0.254156	-0.0961893	1.38027e-05	1	0	1.38027e-05	-4.34698	0.761471
726.2	-0.144715	-0.210271	-0.0791592	1.51347e-05	1	0	1.51347e-05	-4.32672	0.626141
681.3	-0.113108	-0.144735	-0.0814799	2.3961e-12	2	48.6702	2.3961e-12	-7.00924	0.792799
198.1	-0.0412364	-0.0676076	-0.0148652	0.00217832	2	91.9944	0.00217832	-3.06478	0.12638
130.1	-0.20632	-0.300661	-0.111978	1.8159e-05	1	0	1.8159e-05	-4.2864	0.884369
442.1	0.0647105	-0.00178537	0.131206	0.0564766	2	94.0782	0.0564766	1.90734	0.123425
613.9	-0.180054	-0.262515	-0.0975926	1.87182e-05	1	0	1.87182e-05	-4.27966	0.770568
610.2	-0.201284	-0.29373	-0.108839	1.97614e-05	1	0	1.97614e-05	-4.26757	0.858996
389.2	-0.192316	-0.266697	-0.117935	4.02872e-07	2	0	4.02872e-07	-5.0676	0.974582
279.7	-0.254989	-0.372731	-0.137246	2.18927e-05	1	0	2.18927e-05	-4.24466	1.08234
561	-0.064556	-0.0925519	-0.03656	6.19913e-06	2	0	6.19913e-06	-4.51948	0.291759
755.1	-0.212101	-0.310136	-0.114067	2.2298e-05	1	0	2.2298e-05	-4.24054	0.899425
365.1	0.1391	0.0747189	0.203482	2.28846e-05	1	0	2.28846e-05	4.23471	0.589049
695.9	-0.149097	-0.209611	-0.0885824	1.37218e-06	2	0	1.37218e-06	-4.829	0.719989
174.1	0.0723191	0.0437604	0.100878	6.93392e-07	2	0	6.93392e-07	4.96321	0.358935
743.21	-0.0215288	-0.0837811	0.0407235	0.497887	2	96.7861	0.497887	-0.677818	0.0145926
557.1	-0.0981863	-0.146597	-0.0497757	7.03208e-05	2	86.6486	7.03208e-05	-3.9752	0.39031
8	-0.112872	-0.165476	-0.0602675	2.60482e-05	1	0	2.60482e-05	-4.20552	0.474685
696.4	-0.158593	-0.199587	-0.117598	3.39438e-14	2	34.522	3.39438e-14	-7.58232	1.2025
112.3	-0.170614	-0.250361	-0.0908665	2.7495e-05	1	0	2.7495e-05	-4.19328	0.715432
578.9	-0.0902284	-0.117908	-0.0625492	1.66895e-10	2	70.3718	1.66895e-10	-6.38907	0.576476
255.21	-0.263305	-0.345651	-0.180958	3.68048e-10	2	0	3.68048e-10	-6.26701	1.65013
573	-0.081352	-0.119569	-0.0431355	3.01575e-05	1	0	3.01575e-05	-4.17227	0.339423
530.3	0.00651722	-0.0390919	0.0521264	0.779428	2	95.741	0.779428	0.280065	0.00182524
512.3	-0.268815	-0.396254	-0.141375	3.55988e-05	1	0	3.55988e-05	-4.13433	1.11137
691	-0.179678	-0.265089	-0.0942665	3.73624e-05	1	0	3.73624e-05	-4.12321	0.740849
429	0.0786819	0.0410346	0.116329	4.19725e-05	1	0	4.19725e-05	4.09634	0.322308
290	-0.0226671	-0.0614816	0.0161475	0.25238	2	97.0323	0.25238	-1.14459	0.0259444
286	0.0909704	0.0473024	0.134638	4.44332e-05	1	0	4.44332e-05	4.08313	0.371444
70.9	-0.206579	-0.277881	-0.135277	1.35909e-08	2	0	1.35909e-08	-5.67847	1.17305
279.8	-0.234009	-0.34692	-0.121098	4.86274e-05	1	0	4.86274e-05	-4.06213	0.950575
782	-0.0642533	-0.0952813	-0.0332254	4.93235e-05	1	0	4.93235e-05	-4.05881	0.260792
537	-0.0745107	-0.105596	-0.0434258	2.62673e-06	2	57.38	2.62673e-06	-4.69804	0.350054
701.4	-0.211677	-0.314032	-0.109321	5.04811e-05	1	0	5.04811e-05	-4.05339	0.858007
756.5	-0.112667	-0.167428	-0.0579054	5.51981e-05	2	25.8299	5.51981e-05	-4.03245	0.454324
513.3	-0.187504	-0.278558	-0.0964501	5.43336e-05	1	0	5.43336e-05	-4.03616	0.756796
189	-0.000528025	-0.0508893	0.0498333	0.983605	2	95.1429	0.983605	-0.0205497	1.08508e-05
324	-0.165585	-0.246522	-0.0846473	6.07596e-05	1	0	6.07596e-05	-4.00984	0.663968
370.31	0.217831	0.111312	0.324349	6.11815e-05	1	0	6.11815e-05	4.00821	0.873111
41.1	-0.172351	-0.256746	-0.0879569	6.26152e-05	1	0	6.26152e-05	-4.00273	0.689877
573.3	-0.186656	-0.278701	-0.09461	7.0496e-05	1	0	7.0496e-05	-3.97461	0.741882
701.5	-0.155567	-0.244343	-0.0667907	0.000593559	2	79.5567	0.000593559	-3.43454	0.534301
512	-0.0622575	-0.0902433	-0.0342718	1.29967e-05	2	60.6877	1.29967e-05	-4.36016	0.271453
447.7	0.189358	0.0954411	0.283274	7.75605e-05	1	0	7.75605e-05	3.95182	0.748306
386.9	-0.0598494	-0.0889751	-0.0307238	5.63786e-05	2	0	5.63786e-05	-4.02748	0.241042
575.6	-0.257289	-0.385008	-0.12957	7.86723e-05	1	0	7.86723e-05	-3.94841	1.01588
174.11	0.080878	0.0405897	0.121166	8.33152e-05	1	0	8.33152e-05	3.93466	0.318227
759	-0.271054	-0.406285	-0.135824	8.54394e-05	1	0	8.54394e-05	-3.92861	1.06487
394.2	0.174997	0.0875968	0.262398	8.69454e-05	1	0	8.69454e-05	3.9244	0.68676
327.71	-0.106144	-0.159176	-0.0531114	8.74802e-05	1	0	8.74802e-05	-3.92293	0.416394
585.4	0.169658	0.0848743	0.254441	8.77792e-05	1	0	8.77792e-05	3.9221	0.665415
732	-0.257118	-0.385673	-0.128564	8.84967e-05	1	0	8.84967e-05	-3.92014	1.00794
401.3	0.133128	0.0665011	0.199754	8.9913e-05	1	0	8.9913e-05	3.91631	0.521369
711	-0.240348	-0.361232	-0.119465	9.73941e-05	1	0	9.73941e-05	-3.89699	0.936636
498	-0.170627	-0.256607	-0.0846476	0.000100398	1	0	0.000100398	-3.88963	0.663677
741.2	-0.0975518	-0.14027	-0.0548336	7.6125e-06	2	0	7.6125e-06	-4.4758	0.436623
1014	-0.241577	-0.363884	-0.11927	0.000108239	1	0	0.000108239	-3.87134	0.935228
384	-0.233315	-0.351499	-0.11513	0.000109125	1	0	0.000109125	-3.86935	0.902777
443	0.0953083	0.0469089	0.143708	0.000113553	1	0	0.000113553	3.85964	0.367856
428.2	-0.0897956	-0.121136	-0.058455	1.95886e-08	2	96.5876	1.95886e-08	-5.6156	0.504256
459.9	0.105801	0.0513638	0.160238	0.000139333	1	0	0.000139333	3.80935	0.403032
611.11	-0.121916	-0.184706	-0.059127	0.000141417	1	0	0.000141417	-3.80568	0.463974
174.3	-0.25351	-0.384378	-0.122642	0.00014657	1	0	0.00014657	-3.79681	0.962529
371.3	-0.079434	-0.120622	-0.038246	0.000156831	1	0	0.000156831	-3.78	0.30026
793	0.0697766	0.0335822	0.105971	0.000157751	1	0	0.000157751	3.77854	0.263654
613.7	-0.0985568	-0.144528	-0.052586	2.6461e-05	2	0	2.6461e-05	-4.20196	0.414132
480.1	-0.0107283	-0.0610842	0.0396276	0.676263	2	96.8677	0.676263	-0.417568	0.00447979
735.21	0.0426171	0.00763091	0.0776033	0.0169654	2	88.084	0.0169654	2.38746	0.101747
585.31	-0.241716	-0.328217	-0.155215	4.3289e-08	2	0	4.3289e-08	-5.47688	1.32385
132	-0.255817	-0.390726	-0.120907	0.00020194	1	0	0.00020194	-3.71658	0.950763
701.1	-0.134452	-0.205387	-0.0635171	0.000203178	1	0	0.000203178	-3.71503	0.499495
804	-0.104389	-0.159716	-0.0490622	0.000217245	1	0	0.000217245	-3.69807	0.386038
315	-0.166043	-0.248288	-0.0837993	7.59004e-05	2	52.4546	7.59004e-05	-3.95699	0.657032
1013	0.0503075	-0.00553668	0.106152	0.0774558	2	95.3635	0.0774558	1.76564	0.088825
198	-0.128609	-0.197344	-0.0598732	0.000245134	1	0	0.000245134	-3.66729	0.471645
702.2	0.0490981	0.0258124	0.0723837	3.5868e-05	3	0	3.5868e-05	4.1326	0.202903
593	-0.0660737	-0.101581	-0.0305661	0.00026508	1	0	0.00026508	-3.64723	0.240986
217.1	0.044642	0.00616536	0.0831186	0.0229647	2	94.1798	0.0229647	2.27402	0.101517
459	0.0892036	0.0412236	0.137184	0.000268433	1	0	0.000268433	3.644	0.325058
202.2	-0.0101176	-0.0653701	0.0451348	0.719668	2	94.8158	0.719668	-0.358902	0.00363125
735.1	-0.134966	-0.207902	-0.0620305	0.000286803	1	0	0.000286803	-3.62694	0.489515
8.6	-0.175123	-0.269806	-0.0804406	0.000288759	1	0	0.000288759	-3.62518	0.634853
599.8	-0.0864434	-0.133345	-0.0395422	0.000303301	1	0	0.000303301	-3.61246	0.312274
70.3	-0.220869	-0.340839	-0.100899	0.000308042	1	0	0.000308042	-3.60844	0.796993
446.9	-0.209677	-0.300566	-0.118787	6.14006e-06	2	0	6.14006e-06	-4.52151	0.948055
280.1	-0.0732868	-0.113318	-0.0332559	0.000332869	1	0	0.000332869	-3.58828	0.262973
550	0.060982	0.0264495	0.0955145	0.000537846	2	0	0.000537846	3.46116	0.211069
280	-0.0705235	-0.109127	-0.03192	0.000342723	1	0	0.000342723	-3.58066	0.252521
513.31	-0.223444	-0.347485	-0.0994026	0.000414492	1	0	0.000414492	-3.53068	0.788909
1100	-0.0448226	-0.0685503	-0.0210949	0.000213528	2	5.20977	0.000213528	-3.70245	0.165954
350.1	0.0262051	-0.00933016	0.0617404	0.148358	2	94.8525	0.148358	1.44536	0.0378757
599	-0.0798112	-0.101801	-0.0578217	1.1295e-12	3	86.5361	1.1295e-12	-7.11373	0.567755
172.3	0.043361	-0.00988825	0.0966102	0.110488	2	90.8317	0.110488	1.596	0.0692043
618.5	-0.229112	-0.314054	-0.14417	1.24643e-07	2	98.7565	1.24643e-07	-5.28655	1.21121
535.1	-0.192737	-0.252208	-0.133267	2.1244e-10	2	0	2.1244e-10	-6.35207	1.22428
690	-0.0889361	-0.139036	-0.0388366	0.000502597	1	0	0.000502597	-3.47937	0.309442
574.2	-0.184979	-0.289363	-0.0805942	0.000514111	1	0	0.000514111	-3.47329	0.642486
262	-0.104012	-0.153875	-0.0541487	4.34404e-05	2	0	4.34404e-05	-4.08838	0.42524
599.2	-0.0250115	-0.0536785	0.00365546	0.0872585	2	95.8785	0.0872585	-1.71004	0.0427707
286.8	-0.161173	-0.252531	-0.0698148	0.000544579	1	0	0.000544579	-3.45781	0.557305
618.1	0.0894484	0.0386068	0.14029	0.000564059	1	0	0.000564059	3.44833	0.308448
418.1	-0.120136	-0.152735	-0.087536	5.09107e-13	2	0	5.09107e-13	-7.22285	0.867721
380	0.0390767	0.00661339	0.0715401	0.0183122	2	93.1947	0.0183122	2.35924	0.0921916
327.32	-0.0599661	-0.094258	-0.0256743	0.000609279	1	0	0.000609279	-3.42745	0.205531
261.2	-0.0331703	-0.0674107	0.00107015	0.057603	2	98.368	0.057603	-1.89871	0.0629807
430	0.202496	0.0862096	0.318782	0.000642379	1	0	0.000642379	3.41306	0.691131
374	0.0702963	0.0298876	0.110705	0.000650397	1	0	0.000650397	3.40968	0.239688
563	-0.103032	-0.119878	-0.0861855	4.15251e-33	2	90.0696	4.15251e-33	-11.9871	1.23505
214.1	-0.115197	-0.181721	-0.0486733	0.00068864	1	0	0.00068864	-3.39406	0.390987
618	0.044959	0.00471451	0.0852034	0.0285556	2	91.4355	0.0285556	2.18957	0.0984407
979	-0.0796749	-0.125908	-0.0334417	0.000730895	1	0	0.000730895	-3.37772	0.269119
288	-0.0645582	-0.100479	-0.0286371	0.000427516	2	0	0.000427516	-3.52249	0.227406
286.81	-0.160821	-0.254748	-0.0668937	0.000791112	1	0	0.000791112	-3.35589	0.539697
510	-0.00899386	-0.0461477	0.02816	0.635179	2	96.5869	0.635179	-0.47445	0.00426714
368	-0.0591525	-0.0904442	-0.0278609	0.000211358	2	0	0.000211358	-3.70504	0.219162
338.2	-0.0574953	-0.0843568	-0.0306338	2.72656e-05	3	83.9251	2.72656e-05	-4.19518	0.241203
580	-0.175555	-0.279353	-0.0717562	0.000916585	1	0	0.000916585	-3.31495	0.581956
507	0.0957443	0.0389847	0.152504	0.000945697	1	0	0.000945697	3.3062	0.31655
352	-0.11932	-0.19026	-0.0483791	0.000978442	1	0	0.000978442	-3.29665	0.393356
411.3	0.0913859	0.0369437	0.145828	0.00100177	1	0	0.00100177	3.29003	0.300662
512.7	0.0416689	0.0128323	0.0705054	0.00462361	2	83.0819	0.00462361	2.83215	0.118012
199	-0.0623473	-0.0967389	-0.0279558	0.000380635	2	0	0.000380635	-3.55316	0.22153
850	-0.0951096	-0.128346	-0.0618737	2.03815e-08	2	39.502	2.03815e-08	-5.60873	0.533444
709	-0.103182	-0.165356	-0.0410081	0.00114291	1	0	0.00114291	-3.25276	0.335627
429.2	0.047747	-0.0048146	0.100309	0.0750052	2	90.1768	0.0750052	1.78043	0.0850102
292.3	0.0329181	-0.00738142	0.0732177	0.109384	2	92.5472	0.109384	1.60097	0.0527009
370.2	-0.186326	-0.299255	-0.073398	0.0012211	1	0	0.0012211	-3.2339	0.602562
714	-0.108786	-0.152263	-0.0653095	9.38193e-07	2	54.271	9.38193e-07	-4.90418	0.533506
907	-0.0917943	-0.156427	-0.0271621	0.00537506	2	76.5918	0.00537506	-2.78365	0.255524
252.1	0.0516816	0.00711968	0.0962436	0.0230196	2	80.1854	0.0230196	2.27311	0.117478
411.8	-0.154959	-0.178749	-0.131169	2.52293e-37	2	97.8273	2.52293e-37	-12.7665	1.97828
793.2	0.035763	5.19164e-05	0.0714742	0.0496679	2	90.7686	0.0496679	1.96281	0.0701962
274.1	-0.0581178	-0.104472	-0.0117636	0.0139963	2	96.8688	0.0139963	-2.45736	0.142816
618.2	0.108229	0.0412262	0.175233	0.0015457	1	0	0.0015457	3.16596	0.34265
599.5	-0.0776102	-0.104871	-0.0503499	2.4049e-08	2	87.408	2.4049e-08	-5.58002	0.433067
385	-0.213189	-0.346201	-0.0801773	0.00168112	1	0	0.00168112	-3.14145	0.669724
370.3	0.152079	0.0570567	0.247101	0.00170748	1	0	0.00170748	3.13689	0.477056
327.6	-0.203822	-0.331286	-0.0763584	0.00172348	1	0	0.00172348	-3.13416	0.63881
275.51	-0.157934	-0.257111	-0.0587565	0.00180125	1	0	0.00180125	-3.12118	0.49294
202	-0.143444	-0.200057	-0.0868316	6.83064e-07	2	97.9125	6.83064e-07	-4.96612	0.712361
327.7	-0.0757198	-0.123378	-0.0280611	0.0018455	1	0	0.0018455	-3.11403	0.235794
217	0.0650034	0.024032	0.105975	0.00187311	1	0	0.00187311	3.10965	0.202138
229	-0.059486	-0.105907	-0.0130646	0.0120197	2	75.6386	0.0120197	-2.51157	0.149403
386	-0.0467804	-0.0753936	-0.0181672	0.0013535	2	0	0.0013535	-3.20439	0.149903
735	-0.0548433	-0.0895163	-0.0201702	0.001934	1	0	0.001934	-3.10019	0.170024
1011	0.0472453	0.0172644	0.0772262	0.00201064	1	0	0.00201064	3.08866	0.145924
535.8	-0.117813	-0.192628	-0.0429983	0.00202548	1	0	0.00202548	-3.08647	0.363627
377.1	-0.154536	-0.253211	-0.0558617	0.00214348	1	0	0.00214348	-3.0696	0.474364
451	-0.155706	-0.220122	-0.0912891	2.16313e-06	2	55.3896	2.16313e-06	-4.73755	0.737665
374.1	0.0912194	0.0277186	0.15472	0.0048701	2	73.4444	0.0048701	2.8155	0.256829
136	-0.115553	-0.166578	-0.0645281	9.05433e-06	2	66.896	9.05433e-06	-4.43861	0.512895
733.2	-0.169665	-0.255357	-0.0839742	0.000104176	2	0	0.000104176	-3.88065	0.658413
790	-0.0524877	-0.0821732	-0.0228022	0.000529312	2	46.9958	0.000529312	-3.46547	0.181894
480.11	-0.107582	-0.133083	-0.0820819	1.35331e-16	2	96.7707	1.35331e-16	-8.26878	0.889576
276.5	-0.117739	-0.144038	-0.0914391	1.71804e-18	2	80.1589	1.71804e-18	-8.77441	1.03309
271.3	0.0572686	0.0171136	0.0974236	0.00518553	2	25.479	0.00518553	2.79528	0.160082
529	-0.0521257	-0.108109	0.00385795	0.0680163	2	82.5823	0.0680163	-1.8249	0.0951241
433.8	-0.121753	-0.175427	-0.0680781	8.75305e-06	2	97.3711	8.75305e-06	-4.44589	0.541298
352.1	-0.128759	-0.19588	-0.0616381	0.000170031	2	0	0.000170031	-3.75983	0.484112
555.1	-0.132252	-0.188062	-0.0764412	3.41012e-06	2	0	3.41012e-06	-4.64443	0.614235
79.9	-0.101084	-0.168464	-0.0337045	0.00327763	1	0	0.00327763	-2.94042	0.297231
275.5	-0.0961353	-0.160273	-0.0319977	0.00330521	1	0	0.00330521	-2.93783	0.282429
704.1	-0.0687918	-0.11469	-0.0228935	0.00330741	1	0	0.00330741	-2.93762	0.202084
374.3	0.0311161	-0.00920405	0.0714363	0.130393	2	84.2941	0.130393	1.51255	0.0470648
728.71	0.0243797	-0.0242746	0.073034	0.326051	2	87.0176	0.326051	0.982099	0.0239433
740.3	0.115085	0.037181	0.192989	0.00378624	1	0	0.00378624	2.89544	0.333222
402	-0.0361728	-0.0727382	0.000392715	0.0525118	2	79.6614	0.0525118	-1.93891	0.0701359
938.2	-0.0632131	-0.106042	-0.0203845	0.00381734	1	0	0.00381734	-2.89287	0.182868
292.1	-0.0333412	-0.0740774	0.00739501	0.108678	2	95.695	0.108678	-1.60416	0.0534847
252	0.0935323	0.0295225	0.157542	0.00418345	1	0	0.00418345	2.86399	0.267875
690.1	-0.0739451	-0.124569	-0.0233206	0.00419791	1	0	0.00419791	-2.86289	0.211697
281.9	0.169612	0.0533152	0.285909	0.0042559	1	0	0.0042559	2.85854	0.484843
372	-0.0981586	-0.165805	-0.0305119	0.00445436	1	0	0.00445436	-2.84405	0.279168
228	0.0353354	0.00410439	0.0665665	0.026586	2	70.7038	0.026586	2.21754	0.0783578
451.2	-0.104978	-0.143407	-0.0665497	8.59532e-08	2	0	8.59532e-08	-5.35416	0.562072
610.3	-0.1226	-0.210704	-0.0344955	0.00638458	2	35.3103	0.00638458	-2.72735	0.334373
871.4	-0.196334	-0.332586	-0.0600826	0.00473842	1	0	0.00473842	-2.8243	0.554506
859	-0.122907	-0.208418	-0.0373958	0.00484522	1	0	0.00484522	-2.81715	0.346247
735.23	-0.0740373	-0.12244	-0.025635	0.0027175	2	47.3822	0.0027175	-2.99801	0.221964
870.3	0.0237098	-0.0144363	0.0618559	0.223141	2	84.4647	0.223141	1.21822	0.0288837
275.1	-0.0977616	-0.176789	-0.0187337	0.0153263	2	61.676	0.0153263	-2.42458	0.23703
573.7	-0.0911437	-0.155445	-0.0268429	0.00546578	1	0	0.00546578	-2.77822	0.253217
427.12	0.0623244	-0.00702637	0.131675	0.0781728	2	78.4267	0.0781728	1.76139	0.109777
271	0.0527357	0.0129583	0.092513	0.00936424	2	0	0.00936424	2.59846	0.137032
782.3	-0.021125	-0.046915	0.00466493	0.108396	2	97.5087	0.108396	-1.60544	0.033915
963.1	-0.131333	-0.224738	-0.0379284	0.00585329	1	0	0.00585329	-2.75589	0.36194
356	0.0796705	0.0229921	0.136349	0.00586757	1	0	0.00586757	2.75509	0.219499
577	0.0902322	0.0259311	0.154533	0.00595185	1	0	0.00595185	2.75042	0.248177
228.1	0.053951	0.0154231	0.0924788	0.00605826	1	0	0.00605826	2.74461	0.148074
279.1	-0.104523	-0.179184	-0.0298619	0.00607083	1	0	0.00607083	-2.74393	0.286804
962	-0.164979	-0.283404	-0.0465533	0.00632422	1	0	0.00632422	-2.73048	0.450471
727.5	0.0580883	0.00240994	0.113767	0.0408748	2	69.476	0.0408748	2.0448	0.118779
364.1	-0.177645	-0.306793	-0.0484973	0.00701741	1	0	0.00701741	-2.69602	0.478934
509	0.0631791	0.0170687	0.109289	0.00724139	1	0	0.00724139	2.68553	0.16967
295.3	-0.171954	-0.29808	-0.045828	0.00753625	1	0	0.00753625	-2.67217	0.45949
790.6	-0.066009	-0.0887237	-0.0432942	1.22909e-08	3	71.5173	1.22909e-08	-5.69564	0.375963
425.1	-0.0261097	-0.0792916	0.0270721	0.335925	2	95.1792	0.335925	-0.962249	0.0251241
696.42	-0.228047	-0.303217	-0.152877	2.74727e-09	2	0	2.74727e-09	-5.94603	1.35598
512.9	-0.052142	-0.0795739	-0.02471	0.000194963	3	52.2419	0.000194963	-3.72546	0.194253
579.2	-0.176575	-0.262358	-0.090792	5.47483e-05	2	0	5.47483e-05	-4.03437	0.71237
53.1	0.159127	0.041351	0.276904	0.00809337	1	0	0.00809337	2.64815	0.421393
210	-0.0964771	-0.167936	-0.0250185	0.00814085	2	48.7213	0.00814085	-2.64617	0.255295
370	-0.0879248	-0.153432	-0.0224179	0.00851951	1	0	0.00851951	-2.63076	0.231309
711.1	-0.181774	-0.318029	-0.0455185	0.00892872	1	0	0.00892872	-2.61477	0.475297
1015	-0.0507943	-0.0768682	-0.0247204	0.000134437	2	0	0.000134437	-3.81818	0.193942
527.2	-0.149079	-0.230562	-0.067597	0.000335874	2	0	0.000335874	-3.58593	0.534589
564.8	-0.0479393	-0.0834951	-0.0123836	0.00822738	2	24.7613	0.00822738	-2.64259	0.126684
550.6	-0.125308	-0.220117	-0.0304995	0.00958303	1	0	0.00958303	-2.59052	0.324613
840.1	-0.170665	-0.300101	-0.0412299	0.0097568	1	0	0.0097568	-2.58433	0.441056
735.3	-0.0562627	-0.0989803	-0.0135451	0.00983752	1	0	0.00983752	-2.58149	0.145242
624.1	-0.0107161	-0.0818577	0.0604256	0.767819	2	92.3302	0.767819	-0.295229	0.0031637
377	-0.090081	-0.158549	-0.0216132	0.00991687	1	0	0.00991687	-2.57871	0.232293
250.25	0.121695	0.0289131	0.214476	0.0101468	1	0	0.0101468	2.57079	0.312851
931	-0.0943632	-0.1665	-0.0222265	0.01035	1	0	0.01035	-2.56391	0.241939
276	0.0337779	0.00250792	0.0650479	0.0342465	2	82.1885	0.0342465	2.11716	0.0715132
292	0.0149654	-0.0167858	0.0467166	0.355592	2	91.588	0.355592	0.923798	0.013825
736.2	-0.16972	-0.302126	-0.0373151	0.0119921	1	0	0.0119921	-2.51238	0.426402
530.14	-0.0861724	-0.10841	-0.0639349	3.0763e-14	2	26.6611	3.0763e-14	-7.59507	0.654485
743.13	0.130907	0.0276738	0.234139	0.0129398	1	0	0.0129398	2.48542	0.325358
509.1	-0.100084	-0.135758	-0.0644093	3.82769e-08	2	96.8325	3.82769e-08	-5.49862	0.550323
700	-0.0855852	-0.13619	-0.03498	0.000917227	2	39.7086	0.000917227	-3.31476	0.283694
573.6	-0.106989	-0.193733	-0.0202443	0.0156308	1	0	0.0156308	-2.41742	0.258637
535.6	-0.132737	-0.240737	-0.0247371	0.0159993	1	0	0.0159993	-2.40893	0.319755
627.3	0.0407746	0.0126523	0.0688969	0.00448661	3	0	0.00448661	2.84175	0.115871
244.2	0.0588467	0.0104985	0.107195	0.0170512	1	0	0.0170512	2.3856	0.140385
269	-0.0886909	-0.161787	-0.0155943	0.0174001	1	0	0.0174001	-2.37814	0.21092
425	0.0883651	0.0154634	0.161267	0.0175137	1	0	0.0175137	2.37574	0.209933
456	0.0504494	0.00242186	0.098477	0.0395136	2	31.6968	0.0395136	2.0588	0.103865
389.4	-0.0626014	-0.100102	-0.0251004	0.00106857	2	30.6945	0.00106857	-3.27182	0.20482
471	-0.0438523	-0.0992797	0.011575	0.120983	2	70.1778	0.120983	-1.55066	0.0680001
153.2	0.0485976	0.0112991	0.0858961	0.0106582	2	53.1223	0.0106582	2.55371	0.124104
246	-0.0358923	-0.0715153	-0.000269168	0.0482939	2	38.3636	0.0482939	-1.97477	0.0708791
377.3	0.116376	0.0190365	0.213716	0.0191134	1	0	0.0191134	2.34331	0.272706
514.1	0.123893	0.0197861	0.228	0.019674	1	0	0.019674	2.33251	0.288981
473.4	-0.002336	-0.0445353	0.0398633	0.913602	2	95.2297	0.913602	-0.108497	0.000253448
246.7	-0.0763025	-0.141101	-0.0115044	0.0210001	1	0	0.0210001	-2.30798	0.176105
560.2	0.00602864	-0.0752751	0.0873324	0.88445	2	88.7677	0.88445	0.145331	0.000876146
433.5	-0.0700905	-0.147999	0.00781784	0.0778519	2	94.8642	0.0778519	-1.76329	0.12359
292.4	-0.10029	-0.134551	-0.0660299	9.61583e-09	2	96.9918	9.61583e-09	-5.73737	0.575404
747.11	-0.155513	-0.228603	-0.0824236	3.04304e-05	2	0	3.04304e-05	-4.17022	0.648526
506	-0.0121804	-0.0718039	0.0474431	0.688863	2	88.7175	0.688863	-0.400398	0.004877
454	0.0501575	0.0067521	0.093563	0.0235191	1	0	0.0235191	2.2649	0.113602
695.7	-0.0356263	-0.0837103	0.0124576	0.146453	2	67.5152	0.146453	-1.45217	0.0517356
798.1	-0.0833747	-0.128832	-0.0379172	0.000324616	2	60.1853	0.000324616	-3.59482	0.299717
577.1	-0.119976	-0.224979	-0.0149729	0.0251243	1	0	0.0251243	-2.23949	0.268685
780	-0.102728	-0.193135	-0.0123217	0.0259384	1	0	0.0259384	-2.22713	0.228789
342	-0.176651	-0.22782	-0.125482	1.32067e-11	2	0	1.32067e-11	-6.76636	1.19528
722.9	-0.111656	-0.145154	-0.0781582	6.44478e-11	2	39.4052	6.44478e-11	-6.53304	0.729452
480	-0.118642	-0.143152	-0.094133	2.36419e-21	2	95.8127	2.36419e-21	-9.4876	1.12563
350.6	-0.100104	-0.188935	-0.0112719	0.0271951	1	0	0.0271951	-2.20871	0.221099
596.5	-0.0595912	-0.104742	-0.0144402	0.00968722	2	98.074	0.00968722	-2.5868	0.15415
555	-0.0882006	-0.166717	-0.00968383	0.027684	1	0	0.027684	-2.20174	0.194194
807	-0.0271476	-0.0773505	0.0230553	0.289205	2	92.6746	0.289205	-1.05987	0.0287729
446	-0.117417	-0.22212	-0.0127148	0.0279479	1	0	0.0279479	-2.19802	0.258085
800.2	-0.0135752	-0.0680832	0.0409328	0.625459	2	85.6461	0.625459	-0.488128	0.00662644
352.2	-0.107685	-0.173213	-0.0421569	0.00127793	2	0	0.00127793	-3.22089	0.346841
274.11	0.135828	0.0142061	0.257449	0.0286012	1	0	0.0286012	2.18894	0.297318
749	-0.149676	-0.284617	-0.014735	0.0297034	1	0	0.0297034	-2.17402	0.3254
182	0.248984	0.209593	0.288375	3.01169e-35	2	92.7449	3.01169e-35	12.3886	3.08457
184	-0.0844399	-0.161995	-0.00688461	0.0328436	1	0	0.0328436	-2.13399	0.180194
495.1	-0.122636	-0.236346	-0.00892529	0.0345287	1	0	0.0345287	-2.11384	0.259232
800.3	-0.059771	-0.106603	-0.0129391	0.0123675	2	0	0.0123675	-2.50148	0.149516
747.1	-0.085021	-0.164412	-0.00562994	0.0358177	1	0	0.0358177	-2.09899	0.178458
275.53	-0.128072	-0.247842	-0.00830238	0.036094	1	0	0.036094	-2.09587	0.268422
751.21	0.114191	0.00732217	0.22106	0.0362341	1	0	0.0362341	2.09429	0.239149
550.4	-0.0685695	-0.116734	-0.0204053	0.00526549	2	0	0.00526549	-2.79033	0.191331
441	-0.0701279	-0.149871	0.00961508	0.0847729	2	94.0647	0.0847729	-1.72364	0.120875
290.3	-0.108457	-0.210566	-0.00634784	0.0373564	1	0	0.0373564	-2.08185	0.225791
747	-0.0751085	-0.146017	-0.00420027	0.0378846	1	0	0.0378846	-2.0761	0.155933
1002	-0.0563772	-0.109615	-0.00313897	0.0379344	1	0	0.0379344	-2.07556	0.117014
701.3	0.0847097	0.00447949	0.16494	0.0385055	1	0	0.0385055	2.06943	0.175301
809	-0.0792035	-0.154347	-0.00406022	0.0388375	1	0	0.0388375	-2.0659	0.163627
819	-0.0475662	-0.0919582	-0.00317424	0.0357191	2	11.1429	0.0357191	-2.10011	0.0998943
41.12	-0.119436	-0.232955	-0.005918	0.0391906	1	0	0.0391906	-2.06218	0.246299
596	-0.0761654	-0.104287	-0.0480435	1.10613e-07	2	97.3757	1.10613e-07	-5.30837	0.404314
771.1	-0.0362351	-0.0707423	-0.00172796	0.039576	1	0	0.039576	-2.05815	0.0745772
454.1	0.0461786	0.00207957	0.0902776	0.0401281	1	0	0.0401281	2.05243	0.0947782
386.2	-0.00398658	-0.0425017	0.0345286	0.839237	2	93.3461	0.839237	-0.202869	0.000808754
721.2	0.0989951	0.00440024	0.19359	0.0402501	1	0	0.0402501	2.05117	0.203056
741.3	0.00710489	-0.0425535	0.0567633	0.779153	2	91.4189	0.779153	0.280422	0.00199237
429.3	0.0456044	0.00197445	0.0892344	0.0404916	1	0	0.0404916	2.0487	0.0934298
333.4	-0.11214	-0.219491	-0.00478856	0.040616	1	0	0.040616	-2.04743	0.229598
695.8	-0.0592062	-0.11648	-0.00193208	0.0427527	1	0	0.0427527	-2.02612	0.119959
963	-0.0922118	-0.181961	-0.00246219	0.0440336	1	0	0.0440336	-2.01377	0.185693
371.1	-0.0605218	-0.134738	0.0136945	0.109974	2	40.7535	0.109974	-1.59831	0.0967325
270.3	0.067657	0.00158594	0.133728	0.0447447	1	0	0.0447447	2.00705	0.135791
701.2	-0.0809846	-0.115824	-0.0461448	5.21613e-06	2	78.6391	5.21613e-06	-4.5559	0.368958
535.2	-0.0772199	-0.128666	-0.0257738	0.00326227	2	36.9375	0.00326227	-2.94188	0.227172
477	-0.0327285	-0.0732439	0.00778697	0.113361	2	93.0347	0.113361	-1.58326	0.0518178
250.7	-0.0643923	-0.116619	-0.0121654	0.0156703	2	94.2859	0.0156703	-2.4165	0.155604
250.23	-0.0612447	-0.110562	-0.0119275	0.0149336	2	93.5401	0.0149336	-2.43399	0.149069
960.1	-0.0799206	-0.159376	-0.000464973	0.0486702	1	0	0.0486702	-1.97147	0.157561
572	-0.0207627	-0.066462	0.0249365	0.373209	2	67.6516	0.373209	-0.890478	0.0184888
153	0.0881724	0.000400299	0.175944	0.0489601	1	0	0.0489601	1.96894	0.173606
117	-0.122256	-0.244118	-0.00039342	0.0492608	1	0	0.0492608	-1.96633	0.240395
260	-0.060333	-0.120926	0.000260041	0.0509871	1	0	0.0509871	-1.95159	0.117745
694	-0.0263517	-0.057958	0.00525461	0.102234	2	60.8871	0.102234	-1.63412	0.0430617
349	-0.136934	-0.215161	-0.0587072	0.000601649	2	0	0.000601649	-3.43087	0.469802
527	-0.057589	-0.116398	0.00121971	0.0549402	1	0	0.0549402	-1.91935	0.110533
870	-0.0471285	-0.0953545	0.00109746	0.0554419	1	0	0.0554419	-1.9154	0.0902698
519.8	-0.113966	-0.136135	-0.091796	7.09521e-24	2	77.3035	7.09521e-24	-10.0754	1.14825
516.1	-0.170645	-0.225328	-0.115962	9.57504e-10	2	5.85552	9.57504e-10	-6.11634	1.04372
800	0.0164243	-0.0160232	0.0488718	0.321151	2	62.5978	0.321151	0.992095	0.0162945
292.5	-0.12776	-0.259868	0.0043484	0.0580281	1	0	0.0580281	-1.89549	0.242167
516	-0.103224	-0.210255	0.00380662	0.058719	1	0	0.058719	-1.89029	0.195124
704.12	-0.127304	-0.259412	0.00480466	0.0589298	1	0	0.0589298	-1.88872	0.240441
980	-0.0923677	-0.188308	0.00357247	0.0591581	1	0	0.0591581	-1.88702	0.174299
368.4	0.0209871	-0.0429591	0.0849334	0.520056	2	79.8477	0.520056	0.64326	0.0135002
241.2	0.0264739	-0.01426	0.0672079	0.202725	2	55.309	0.202725	1.27383	0.0337232
459.1	0.0952983	-0.0040218	0.194618	0.0600218	1	0	0.0600218	1.88063	0.179221
588.2	0.127744	-0.00560291	0.261091	0.0604297	1	0	0.0604297	1.87765	0.239858
740.12	-0.0832375	-0.170239	0.00376434	0.0607658	1	0	0.0607658	-1.8752	0.156087
503	-0.00399418	-0.080524	0.0725356	0.918524	2	86.9984	0.918524	-0.102293	0.000408576
281	0.0649275	-0.00410963	0.133965	0.0652815	1	0	0.0652815	1.84333	0.119683
694.2	-0.0181944	-0.0477095	0.0113208	0.226969	3	38.078	0.226969	-1.2082	0.0219825
454.11	0.0342791	-0.0100234	0.0785815	0.129387	2	6.54901	0.129387	1.51652	0.051985
593.2	0.0520801	-0.00382701	0.107987	0.0678755	1	0	0.0678755	1.82583	0.0950896
475.9	0.0504444	-0.00387734	0.104766	0.0687437	1	0	0.0687437	1.8201	0.0918139
367.9	-0.034192	-0.0913437	0.0229597	0.240964	2	93.4784	0.240964	-1.17258	0.0400929
260.6	-0.0850999	-0.136431	-0.0337689	0.00115667	2	0	0.00115667	-3.24935	0.27652
275	0.0365767	-0.00400478	0.0771581	0.0772991	1	0	0.0772991	1.76658	0.0646155
977	0.105394	-0.0115438	0.222332	0.0773096	1	0	0.0773096	1.76651	0.18618
911	-0.121354	-0.256628	0.0139193	0.0786928	1	0	0.0786928	-1.75832	0.21338
350.3	0.0359825	-0.0269423	0.0989072	0.262384	2	55.3267	0.262384	1.12077	0.0403282
555.2	-0.0535552	-0.099133	-0.0079773	0.0212784	2	0	0.0212784	-2.30301	0.123338
427.3	-0.0141798	-0.0431368	0.0147773	0.337175	2	91.3567	0.337175	-0.959761	0.0136092
211	-0.0509451	-0.108581	0.00669045	0.0831883	1	0	0.0831883	-1.73248	0.0882612
300.13	-0.125859	-0.179717	-0.0720021	4.64418e-06	2	0	4.64418e-06	-4.58025	0.576467
722	-0.0288324	-0.059148	0.00148325	0.062312	2	0	0.062312	-1.86407	0.0537455
741.4	-0.0632521	-0.0957402	-0.0307641	0.000135673	2	88.4976	0.000135673	-3.81593	0.241366
458.2	0.104613	-0.0156166	0.224842	0.0881168	1	0	0.0881168	1.70542	0.178409
250.2	0.0310515	-0.00471582	0.0668188	0.0888342	1	0	0.0888342	1.70158	0.0528366
225.1	0.00464315	-0.054711	0.0639973	0.878143	2	74.6771	0.878143	0.153324	0.000711905
374.6	0.0551046	-0.00881839	0.119028	0.0911023	1	0	0.0911023	1.68961	0.0931053
598	-0.081515	-0.116495	-0.046535	4.93893e-06	2	90.7326	4.93893e-06	-4.56737	0.372309
737.1	0.000838039	-0.0739544	0.0756304	0.982479	2	81.8435	0.982479	0.0219611	1.84043e-05
225	0.0853505	-0.0138443	0.184545	0.0917095	1	0	0.0917095	1.68645	0.143939
276.41	-0.0770026	-0.125115	-0.0288898	0.00170777	2	93.5779	0.00170777	-3.13684	0.241545
560.1	-0.12499	-0.200533	-0.0494459	0.00118351	2	0	0.00118351	-3.24283	0.40532
714.1	-0.105431	-0.132907	-0.077955	5.44428e-14	2	69.9985	5.44428e-14	-7.5208	0.792924
709.2	-0.123173	-0.175878	-0.0704673	4.63994e-06	2	79.193	4.63994e-06	-4.58044	0.564185
729	-0.0309906	-0.0672331	0.00525192	0.093743	1	0	0.093743	-1.67598	0.0519394
184.1	-0.0857173	-0.186206	0.0147718	0.0945478	1	0	0.0945478	-1.67188	0.143309
270	0.0523022	-0.00914163	0.113746	0.0952383	1	0	0.0952383	1.66839	0.0872604
227	-0.078291	-0.170267	0.0136852	0.0952422	1	0	0.0952422	-1.66837	0.130618
803.1	-0.0295799	-0.0699444	0.0107845	0.150916	2	87.712	0.150916	-1.4363	0.0424857
565.1	-0.0706446	-0.0979422	-0.0433471	3.93077e-07	2	0	3.93077e-07	-5.07228	0.358329
359	-0.0889648	-0.195363	0.0174331	0.101243	1	0	0.101243	-1.63886	0.145801
592.11	0.0362743	-0.00716804	0.0797166	0.101715	1	0	0.101715	1.6366	0.0593664
200	-0.0137578	-0.0763554	0.0488397	0.666639	2	82.0307	0.666639	-0.430765	0.0059264
764	-0.05993	-0.0867357	-0.0331244	1.17628e-05	2	85.5393	1.17628e-05	-4.38194	0.26261
41.4	0.0845327	-0.0178595	0.186925	0.105634	1	0	0.105634	1.61813	0.136785
687.3	-0.0858966	-0.190605	0.0188121	0.107865	1	0	0.107865	-1.60786	0.13811
858	-0.0339035	-0.0664048	-0.00140226	0.0409016	2	88.725	0.0409016	-2.04453	0.0693167
473.3	0.0928778	-0.020454	0.20621	0.108216	1	0	0.108216	1.60626	0.149186
204	-0.0389309	-0.121783	0.0439216	0.357076	2	90.399	0.357076	-0.920952	0.0358535
281.11	-0.19871	-0.264054	-0.133365	2.5198e-09	2	67.7981	2.5198e-09	-5.96017	1.18434
289.3	-0.0205477	-0.0903073	0.0492118	0.563731	2	64.0278	0.563731	-0.577309	0.0118624
707.3	-0.0819766	-0.183814	0.019861	0.114624	1	0	0.114624	-1.57775	0.129338
788	-0.0318507	-0.0721464	0.00844491	0.121325	1	0	0.121325	-1.54924	0.0493443
851	-0.0576207	-0.130577	0.0153357	0.121622	1	0	0.121622	-1.548	0.0891969
743.4	-0.0788552	-0.179345	0.021635	0.124043	1	0	0.124043	-1.53802	0.121281
250.6	-0.166956	-0.251334	-0.0825779	0.000105271	2	73.6119	0.000105271	-3.87811	0.647474
727.6	-0.0534395	-0.121915	0.0150359	0.126111	1	0	0.126111	-1.52962	0.081742
420.3	-0.0537246	-0.121581	0.0141313	0.120712	2	89.1732	0.120712	-1.55179	0.0833694
627.5	0.0341876	-0.0100133	0.0783885	0.129524	1	0	0.129524	1.51598	0.0518279
379	-0.038512	-0.0705482	-0.00647575	0.0184656	2	87.1474	0.0184656	-2.35615	0.0907399
592	-0.0296543	-0.0682035	0.00889497	0.13162	1	0	0.13162	-1.50774	0.044711
681.6	-0.102095	-0.136082	-0.0681071	3.9211e-09	2	0	3.9211e-09	-5.88749	0.601081
452.2	0.0527273	-0.0161493	0.121604	0.133499	1	0	0.133499	1.50044	0.0791145
509.8	0.00289198	-0.043848	0.049632	0.903477	2	88.7345	0.903477	0.121271	0.000350713
420	0.0542822	-0.0174443	0.126009	0.13799	1	0	0.13799	1.48332	0.0805177
722.7	-0.0919795	-0.213847	0.0298881	0.139058	1	0	0.139058	-1.47931	0.136066
244.1	-0.00919796	-0.0497291	0.0313331	0.656474	2	80.5131	0.656474	-0.444786	0.00409113
771	-0.0284061	-0.0570493	0.000237151	0.0519272	2	25.0629	0.0519272	-1.94374	0.055214
53	-0.0402833	-0.0847566	0.00419006	0.0758474	2	0	0.0758474	-1.77531	0.0715151
567	-0.054408	-0.119148	0.0103323	0.099525	2	0	0.099525	-1.64716	0.0896187
707.2	0.0649331	-0.0241769	0.154043	0.153228	1	0	0.153228	1.42822	0.0927389
575.8	-0.0970729	-0.144055	-0.0500904	5.13097e-05	2	0	5.13097e-05	-4.04958	0.393105
350.5	-0.095721	-0.227531	0.0360887	0.154631	1	0	0.154631	-1.42336	0.136246
378	-0.0571025	-0.136309	0.0221037	0.157647	1	0	0.157647	-1.41303	0.0806877
227.1	0.0940525	-0.0368576	0.224963	0.159083	1	0	0.159083	1.40816	0.132441
285	-0.0228102	-0.0527051	0.00708464	0.134789	2	0	0.134789	-1.49548	0.0341123
598.9	-0.0518791	-0.0933761	-0.0103821	0.0142728	2	86.7347	0.0142728	-2.45032	0.127121
193	-0.0160372	-0.0925417	0.0604673	0.681178	2	65.6949	0.681178	-0.410856	0.00658897
286.9	0.0611839	-0.024582	0.14695	0.162044	1	0	0.162044	1.39823	0.0855492
736	-0.0446715	-0.107785	0.0184417	0.165354	1	0	0.165354	-1.38729	0.0619722
751	-0.0554629	-0.134669	0.0237436	0.169922	1	0	0.169922	-1.37245	0.0761203
184.11	0.00631337	-0.0428204	0.0554471	0.801163	2	63.8188	0.801163	0.251843	0.00158998
589	0.0693668	-0.0300853	0.168819	0.171601	1	0	0.171601	1.36708	0.0948298
281.12	0.0677393	-0.0300922	0.165571	0.174743	1	0	0.174743	1.35712	0.0919303
359.2	-0.0751687	-0.184868	0.0345308	0.17926	1	0	0.17926	-1.34304	0.100954
197	-0.0426048	-0.104822	0.0196126	0.179546	1	0	0.179546	-1.34216	0.0571823
754.2	0.0788869	-0.0368137	0.194587	0.18143	1	0	0.18143	1.33637	0.105422
1019	-0.0812706	-0.1012	-0.0613411	1.32195e-15	2	93.0474	1.32195e-15	-7.99253	0.649558
532	-0.085857	-0.10756	-0.0641541	8.92873e-15	2	93.4173	8.92873e-15	-7.75365	0.665706
627.22	-0.0526598	-0.131061	0.025741	0.188012	1	0	0.188012	-1.31648	0.0693257
504	-0.0394939	-0.109006	0.0300178	0.265461	2	87.4903	0.265461	-1.11358	0.0439796
473.1	-0.0873429	-0.218254	0.0435681	0.190976	1	0	0.190976	-1.3077	0.114218
287.1	-0.0723523	-0.181198	0.0364933	0.192623	1	0	0.192623	-1.30286	0.0942649
348	-0.0396172	-0.0996338	0.0203993	0.195732	1	0	0.195732	-1.29381	0.051257
794	-0.082502	-0.208382	0.0433776	0.198935	1	0	0.198935	-1.28459	0.105981
363.3	0.0807657	-0.0438177	0.205349	0.203856	1	0	0.203856	1.27064	0.102624
280.2	-0.0645105	-0.126559	-0.00246183	0.0415772	2	0	0.0415772	-2.03773	0.131455
496.2	0.0408237	-0.0226292	0.104277	0.207307	1	0	0.207307	1.26101	0.0514789
208	0.0169095	-0.0114958	0.0453148	0.243309	2	0	0.243309	1.16676	0.0197293
276.4	0.0535799	-0.0317064	0.138866	0.218195	1	0	0.218195	1.23134	0.0659751
579.8	-0.033455	-0.0659087	-0.00100122	0.0433388	2	90.3463	0.0433388	-2.02043	0.0675934
721.8	0.00740976	-0.0547737	0.0695932	0.815335	2	52.7291	0.815335	0.233549	0.00173054
573.5	0.00478428	-0.068385	0.0779536	0.898026	2	44.0175	0.898026	0.128155	0.000613131
41.8	-0.0749617	-0.198538	0.0486143	0.234462	1	0	0.234462	-1.18894	0.0891253
750.2	-0.0567112	-0.150236	0.0368142	0.234641	1	0	0.234641	-1.18849	0.0674006
550.1	0.00409132	-0.0434868	0.0516694	0.866158	2	31.7235	0.866158	0.168541	0.000689553
597	-0.0607639	-0.115979	-0.00554851	0.0310121	2	0	0.0310121	-2.15692	0.131063
473	-0.0142297	-0.0524358	0.0239764	0.465403	2	91.3077	0.465403	-0.72998	0.0103874
530.2	-0.0835849	-0.127952	-0.0392175	0.000222125	2	93.3569	0.000222125	-3.69243	0.308631
739	-0.0498051	-0.121133	0.0215232	0.17114	2	0	0.17114	-1.36855	0.0681607
790.1	-0.059582	-0.165206	0.0460417	0.268887	1	0	0.268887	-1.10563	0.0658756
194	-0.0713041	-0.197983	0.0553747	0.269927	1	0	0.269927	-1.10323	0.0786649
276.6	-0.0790152	-0.133519	-0.0245112	0.0044918	2	87.7757	0.0044918	-2.84139	0.224512
750	-0.0430836	-0.120469	0.0343021	0.275181	1	0	0.275181	-1.09121	0.0470132
530.11	0.00684537	-0.020453	0.0341437	0.623085	2	88.8482	0.623085	0.491483	0.00336438
840.2	-0.0414159	-0.117714	0.0348818	0.287362	1	0	0.287362	-1.06393	0.0440635
415.11	0.0435591	-0.0372751	0.124393	0.290884	1	0	0.290884	1.05618	0.0460064
395.4	0.00338119	-0.086129	0.0928914	0.940981	2	44.8241	0.940981	0.0740365	0.000250332
348.9	0.0205664	-0.0433	0.0844328	0.527942	2	0	0.527942	0.631151	0.0129805
458	-0.0319405	-0.0678582	0.00397714	0.0813443	2	92.9925	0.0813443	-1.74294	0.0556704
224.1	0.0484342	-0.0431471	0.140015	0.299933	1	0	0.299933	1.03658	0.0502058
250.3	-0.0410368	-0.11987	0.0377962	0.307594	1	0	0.307594	-1.02028	0.0418692
282	-0.0656761	-0.193999	0.0626464	0.315794	1	0	0.315794	-1.00314	0.0658822
279.11	-0.0547184	-0.161756	0.0523196	0.316362	1	0	0.316362	-1.00196	0.0548258
362.6	-0.0512873	-0.153267	0.0506922	0.324271	1	0	0.324271	-0.985719	0.0505549
772.1	-0.0602061	-0.179986	0.0595741	0.32454	1	0	0.32454	-0.985171	0.0593133
530.13	0.0442096	-0.0439187	0.132338	0.325492	1	0	0.325492	0.983234	0.0434684
715.1	-0.0362067	-0.10941	0.0369969	0.332335	1	0	0.332335	-0.969421	0.0350995
528.5	-0.0620868	-0.126443	0.00226933	0.0586442	2	0	0.0586442	-1.89085	0.117397
346.1	0.0367505	-0.0381867	0.111688	0.336443	1	0	0.336443	0.961218	0.0353253
854	-0.129625	-0.178089	-0.0811601	1.58684e-07	2	50.1481	1.58684e-07	-5.24219	0.679516
415.1	0.0384958	-0.0419391	0.118931	0.348219	1	0	0.348219	0.938049	0.036111
965.1	-0.111456	-0.148981	-0.0739302	5.83773e-09	2	86.9183	5.83773e-09	-5.82134	0.648822
411.1	-0.164116	-0.206424	-0.121808	2.8961e-14	2	95.7447	2.8961e-14	-7.60288	1.24776
771.2	-0.0316618	-0.101241	0.0379169	0.372448	1	0	0.372448	-0.891898	0.0282391
348.8	-0.0499781	-0.161271	0.0613152	0.378767	1	0	0.378767	-0.88017	0.0439892
800.4	0.0496213	-0.0622182	0.161461	0.384509	1	0	0.384509	0.869619	0.0431516
327.41	0.0267071	-0.0338908	0.087305	0.387685	1	0	0.387685	0.863824	0.0230702
990	0.0272676	-0.0357561	0.0902913	0.396434	1	0	0.396434	0.848007	0.0231231
803	-0.0082865	-0.0503586	0.0337855	0.699471	2	87.9565	0.699471	-0.386034	0.00319887
378.1	-0.0281013	-0.0928356	0.036633	0.394867	2	68.0479	0.394867	-0.850824	0.0239092
427	-0.0167815	-0.044367	0.010804	0.233129	2	65.8284	0.233129	-1.19234	0.0200092
803.2	-0.0230337	-0.0782409	0.0321734	0.413495	1	0	0.413495	-0.817759	0.018836
961	-0.0773224	-0.132713	-0.0219318	0.00621894	2	79.4195	0.00621894	-2.73601	0.211555
289.8	-0.0549875	-0.188031	0.0780564	0.417897	1	0	0.417897	-0.810075	0.044544
496.21	-0.261541	-0.295943	-0.227139	3.27078e-50	2	98.4944	3.27078e-50	-14.9005	3.89709
364	-0.00296576	-0.0571386	0.0512071	0.914551	2	61.0941	0.914551	-0.107301	0.000318228
706.8	0.0178171	-0.0271267	0.0627609	0.437157	1	0	0.437157	0.777003	0.0138439
527.7	0.0297062	-0.0452316	0.104644	0.437179	1	0	0.437179	0.776966	0.0230807
110.11	-0.0171475	-0.0607642	0.0264693	0.440971	1	0	0.440971	-0.770554	0.0132131
751.2	0.0357594	-0.0560219	0.127541	0.445078	1	0	0.445078	0.763647	0.0273076
560	0.0242592	-0.0380187	0.086537	0.445176	1	0	0.445176	0.763482	0.0185214
375.2	-0.0382676	-0.100328	0.0237923	0.226832	2	61.0394	0.226832	-1.20856	0.0462487
1008	-0.105	-0.177262	-0.0327373	0.00440091	2	0	0.00440091	-2.8479	0.299028
38.3	-0.0482378	-0.174919	0.0784432	0.455467	1	0	0.455467	-0.746332	0.0360014
790.8	-0.0410603	-0.148911	0.06679	0.455545	1	0	0.455545	-0.746203	0.0306393
333	-0.015599	-0.0626356	0.0314376	0.515697	2	83.1251	0.515697	-0.649993	0.0101392
593.1	0.027509	-0.0464953	0.101513	0.466262	1	0	0.466262	0.728575	0.0200424
539	-0.013004	-0.0419088	0.0159008	0.3779	2	0	0.3779	-0.881772	0.0114666
530.1	-0.0426651	-0.0621485	-0.0231817	1.77095e-05	3	93.4623	1.77095e-05	-4.29197	0.183117
288.2	0.0196571	-0.034913	0.0742272	0.480172	1	0	0.480172	0.706026	0.0138784
158	0.0158867	-0.042458	0.0742314	0.593564	2	0	0.593564	0.533678	0.00847837
595	-0.0217489	-0.0643695	0.0208716	0.317236	2	53.3156	0.317236	-1.00015	0.0217523
529.6	-0.045567	-0.17678	0.0856461	0.496087	1	0	0.496087	-0.680659	0.0310156
555.21	-0.0580183	-0.142192	0.026155	0.176712	2	0	0.176712	-1.35095	0.0783797
224	0.0301614	-0.0573591	0.117682	0.499386	1	0	0.499386	0.675457	0.0203727
941	0.0395834	-0.046009	0.125176	0.364717	2	66.6101	0.364717	0.906413	0.0358789
420.2	-0.0406442	-0.0933588	0.0120705	0.130744	2	71.8086	0.130744	-1.51118	0.0614205
8.5	-0.0856531	-0.134056	-0.0372504	0.000523678	2	57.3308	0.000523678	-3.46834	0.297074
961.1	-0.0370505	-0.0871318	0.0130307	0.147059	2	0	0.147059	-1.45	0.0537232
592.1	-0.0477478	-0.079528	-0.0159676	0.00323241	2	88.8311	0.00323241	-2.94473	0.140604
316.1	-0.0413051	-0.170192	0.0875816	0.529917	1	0	0.529917	-0.628133	0.0259451
365.2	0.0431343	-0.011132	0.0974006	0.119256	2	0	0.119256	1.5579	0.0671991
216.1	0.00833433	-0.0194198	0.0360884	0.556148	1	0	0.556148	0.588572	0.00490535
556	-0.048964	-0.126436	0.0285082	0.215443	2	0	0.215443	-1.23874	0.0606536
772.3	0.0150175	-0.0363093	0.0663444	0.566327	1	0	0.566327	0.573469	0.0086121
967	-0.0207604	-0.0917205	0.0501997	0.566356	1	0	0.566356	-0.573426	0.0119045
530.5	-0.0391107	-0.0967105	0.0184892	0.183246	2	76.912	0.183246	-1.33083	0.0520495
368.2	-0.0407021	-0.0980337	0.0166294	0.164085	2	77.2877	0.164085	-1.39146	0.0566355
588	0.0325053	-0.0846521	0.149663	0.586578	1	0	0.586578	0.543801	0.0176764
710.19	-0.0387419	-0.131038	0.0535546	0.410676	2	0	0.410676	-0.822705	0.0318732
733.8	-0.1026	-0.161825	-0.043376	0.000685174	2	59.6892	0.000685174	-3.39544	0.348374
710	-0.0312411	-0.145157	0.0826752	0.590907	1	0	0.590907	-0.537523	0.0167928
361	0.027902	-0.0233109	0.079115	0.285595	2	0	0.285595	1.06784	0.0297948
276.14	-0.0115527	-0.0548703	0.0317649	0.601165	1	0	0.601165	-0.522726	0.00603888
710.1	-0.0304756	-0.149363	0.0884121	0.615369	1	0	0.615369	-0.502425	0.0153117
564.9	0.0138975	-0.0404099	0.0682049	0.615968	1	0	0.615968	0.501573	0.00697062
364.4	-0.00148307	-0.053668	0.0507018	0.95558	2	0	0.95558	-0.0557011	8.26085e-05
175	-0.0434963	-0.0665876	-0.0204049	0.000222582	2	94.5495	0.000222582	-3.6919	0.160584
452	-0.00864749	-0.0554224	0.0381274	0.717092	2	59.6264	0.717092	-0.362348	0.0031334
707	-0.0684442	-0.113628	-0.0232607	0.00298804	2	90.925	0.00298804	-2.96897	0.203208
250.41	-0.0123945	-0.0463376	0.0215485	0.47418	2	78.7219	0.47418	-0.715695	0.00887071
735.2	-0.0124282	-0.0443156	0.0194593	0.444928	2	46.8206	0.444928	-0.763898	0.00949385
241.1	-0.00562526	-0.0438056	0.0325551	0.772758	2	0	0.772758	-0.288769	0.0016244
781.2	0.0264071	-0.0922602	0.145074	0.662721	1	0	0.662721	0.43616	0.0115177
327.31	0.0212137	-0.0766221	0.119049	0.670847	1	0	0.670847	0.424986	0.00901551
754	0.0212016	-0.0790314	0.121435	0.678446	1	0	0.678446	0.414585	0.00878986
334	-0.0756016	-0.126601	-0.0246022	0.00366724	2	86.4159	0.00366724	-2.90545	0.219657
857	0.0260006	-0.0993604	0.151362	0.684364	1	0	0.684364	0.406516	0.0105697
172.11	0.0576701	0.0185163	0.0968238	0.0038911	2	3.94034	0.0038911	2.88686	0.166485
994	0.015882	-0.0621586	0.0939226	0.689983	1	0	0.689983	0.398878	0.00633497
284	-0.123727	-0.206017	-0.0414378	0.0032095	2	70.8592	0.0032095	-2.94693	0.364615
556.1	-0.0342686	-0.103602	0.0350648	0.332681	2	0	0.332681	-0.968727	0.0331969
803.3	-0.0572474	-0.115972	0.00147681	0.0560464	2	0	0.0560464	-1.91067	0.109381
450	-0.0653966	-0.109463	-0.0213301	0.00362966	2	72.523	0.00362966	-2.90867	0.190217
715	-0.0758645	-0.116038	-0.0356907	0.000214575	2	94.1205	0.000214575	-3.70121	0.28079
763	0.00624722	-0.0291972	0.0416917	0.72975	1	0	0.72975	0.345458	0.00215815
458.1	-0.120291	-0.157896	-0.0826855	3.6225e-10	2	93.8146	3.6225e-10	-6.26948	0.754161
458.9	0.00965168	-0.0463013	0.0656046	0.735293	1	0	0.735293	0.338093	0.00326317
270.38	-0.0157576	-0.114707	0.0831916	0.754943	1	0	0.754943	-0.312128	0.00491839
599.9	-0.0305288	-0.0681731	0.00711559	0.11195	2	86.1595	0.11195	-1.58949	0.0485251
531.4	0.0130292	-0.0742351	0.100294	0.769795	1	0	0.769795	0.292642	0.0038129
249	-0.016748	-0.129897	0.0964006	0.771728	1	0	0.771728	-0.290115	0.00485884
750.1	-0.0193338	-0.153008	0.11434	0.776807	1	0	0.776807	-0.283482	0.00548078
531.2	0.0122775	-0.0726177	0.0971728	0.776828	1	0	0.776828	0.283455	0.00348013
530	-0.00919862	-0.0354793	0.0170821	0.492704	3	79.4089	0.492704	-0.686015	0.00631039
346	0.00933045	-0.0567829	0.0754438	0.782079	1	0	0.782079	0.276611	0.0025809
733.4	-0.0517286	-0.130728	0.0272704	0.199357	2	41.297	0.199357	-1.28339	0.0663877
281.1	0.0112956	-0.0699469	0.0925381	0.78523	1	0	0.78523	0.27251	0.00307816
531	-0.00837886	-0.0697431	0.0529854	0.788989	1	0	0.788989	-0.267624	0.00224238
389.5	-0.0114342	-0.103317	0.0804482	0.8073	1	0	0.8073	-0.24391	0.00278893
287	0.0058999	-0.0461205	0.0579203	0.824085	1	0	0.824085	0.222294	0.00131151
250.24	-0.0628678	-0.119581	-0.00615467	0.0298055	2	93.9028	0.0298055	-2.17266	0.136591
722.6	-0.0470499	-0.0724687	-0.0216311	0.000285774	2	95.3016	0.000285774	-3.62787	0.170691
994.2	-0.071891	-0.101802	-0.0419798	2.46826e-06	2	76.1796	2.46826e-06	-4.71073	0.33866
750.21	-0.010774	-0.120134	0.0985864	0.846884	1	0	0.846884	-0.193096	0.00208043
722.8	-0.0104378	-0.117963	0.0970873	0.849103	1	0	0.849103	-0.190263	0.00198592
965	-0.115639	-0.141233	-0.0900455	8.32376e-19	2	89.3824	8.32376e-19	-8.8556	1.02406
287.3	-0.00526572	-0.073985	0.0634536	0.880616	1	0	0.880616	-0.150188	0.000790849
375.1	0.00283451	-0.0347902	0.0404593	0.882612	1	0	0.882612	0.147659	0.000418542
724.9	-0.0331972	-0.0904449	0.0240506	0.255724	2	41.9828	0.255724	-1.13656	0.0377304
368.1	-0.018222	-0.0813338	0.0448899	0.571468	2	0	0.571468	-0.56589	0.0103116
241	-0.00271678	-0.0414861	0.0360526	0.890756	1	0	0.890756	-0.137348	0.000373145
362.3	0.00784905	-0.113788	0.129486	0.899355	1	0	0.899355	0.126476	0.000992718
585.2	-0.0734558	-0.139429	-0.00748256	0.0290904	2	32.3226	0.0290904	-2.18226	0.1603
960	-0.0899415	-0.114682	-0.0652012	1.0385e-12	2	91.4091	1.0385e-12	-7.12531	0.640861
375	-0.00826538	-0.0367681	0.0202374	0.56979	2	0	0.56979	-0.568361	0.00469772
560.4	0.00371441	-0.0752452	0.082674	0.926537	1	0	0.926537	0.0922023	0.000342477
723.1	0.00496321	-0.111984	0.121911	0.933707	1	0	0.933707	0.0831817	0.000412848
366.1	0.00499182	-0.123056	0.133039	0.939094	1	0	0.939094	0.076409	0.00038142
799	-0.00440348	-0.125804	0.116997	0.943323	1	0	0.943323	-0.0710939	0.00031306
8.52	0.00365423	-0.107103	0.114412	0.94844	1	0	0.94844	0.0646665	0.000236306
396	-0.0411549	-0.0764222	-0.00588763	0.0221861	2	83.3954	0.0221861	-2.28717	0.0941282
427.5	-0.00246599	-0.0396911	0.0347591	0.896694	2	0	0.896694	-0.129838	0.000320179
275.3	-0.00207491	-0.0730356	0.0688858	0.954297	1	0	0.954297	-0.057311	0.000118915
550.5	0.00137907	-0.0739871	0.0767453	0.97139	1	0	0.97139	0.0358646	4.94599e-05
426.7	-0.00267349	-0.0395587	0.0342118	0.887032	2	0	0.887032	-0.142061	0.000379798
38	0.000805911	-0.0721551	0.0737669	0.982727	1	0	0.982727	0.0216497	1.74477e-05
681.5	-0.0745919	-0.10468	-0.0445041	1.17966e-06	2	88.6289	1.17966e-06	-4.85902	0.362444
363	-0.000882518	-0.10923	0.107465	0.987263	1	0	0.987263	-0.0159647	1.40891e-05
575.9	0.000819117	-0.106544	0.108182	0.988069	1	0	0.988069	0.0149537	1.22488e-05
960.2	-0.000398298	-0.0677555	0.0669589	0.990753	1	0	0.990753	-0.0115899	4.61625e-06
571.51	-0.0846818	-0.15408	-0.0152832	0.0167753	2	75.9351	0.0167753	-2.3916	0.202525
969	-0.31997	-0.390561	-0.249379	0	1	0	5e-302	-37.1465	11.8858
297.2	-0.343395	-0.424316	-0.262474	0	1	0	5e-302	-37.1465	12.7559
509.2	-0.159988	-0.202262	-0.117713	1.19238e-13	1	0	1.19238e-13	-7.41763	1.18673
560.3	-0.267515	-0.339619	-0.195411	3.54605e-13	1	0	3.54605e-13	-7.27185	1.94533
480.2	-0.24842	-0.318224	-0.178616	3.05311e-12	1	0	3.05311e-12	-6.97526	1.73279
729.1	-0.280239	-0.364185	-0.196292	6.0264e-11	1	0	6.0264e-11	-6.54308	1.83362
447.1	-0.308735	-0.407984	-0.209485	1.08129e-09	1	0	1.08129e-09	-6.09692	1.88233
411.9	-0.199588	-0.265742	-0.133434	3.35201e-09	1	0	3.35201e-09	-5.91336	1.18024
580.14	-0.312725	-0.424385	-0.201065	4.0344e-08	1	0	4.0344e-08	-5.48934	1.71665
442.11	-0.288851	-0.395684	-0.182018	1.16199e-07	1	0	1.16199e-07	-5.29938	1.53073
530.12	-0.11441	-0.157139	-0.0716806	1.5375e-07	1	0	1.5375e-07	-5.24801	0.600424
81	-0.184673	-0.25731	-0.112036	6.25611e-07	1	0	6.25611e-07	-4.98314	0.92025
501	-0.156588	-0.221962	-0.0912142	2.66957e-06	1	0	2.66957e-06	-4.69473	0.735139
289.5	-0.217836	-0.312989	-0.122684	7.22016e-06	1	0	7.22016e-06	-4.48709	0.977452
317.11	-0.272335	-0.396913	-0.147757	1.83003e-05	1	0	1.83003e-05	-4.28468	1.16687
578.1	-0.125557	-0.18665	-0.0644643	5.62137e-05	1	0	5.62137e-05	-4.02817	0.505765
38.1	-0.120807	-0.184223	-0.0573914	0.000188605	1	0	0.000188605	-3.73381	0.45107
802	-0.117157	-0.178744	-0.0555698	0.000192625	1	0	0.000192625	-3.7285	0.436819
571.81	-0.208651	-0.319259	-0.0980426	0.000217875	1	0	0.000217875	-3.69733	0.771452
276.11	-0.162436	-0.254556	-0.0703158	0.000548097	1	0	0.000548097	-3.45608	0.561391
38.2	-0.181367	-0.285666	-0.0770683	0.00065373	1	0	0.00065373	-3.40828	0.61815
415.21	-0.201115	-0.3196	-0.0826293	0.000878296	1	0	0.000878296	-3.32686	0.669082
281.13	-0.200309	-0.327039	-0.0735791	0.00194849	1	0	0.00194849	-3.09797	0.620552
430.1	-0.121202	-0.19958	-0.0428231	0.00243851	1	0	0.00243851	-3.03087	0.367347
290.16	-0.125398	-0.206751	-0.0440443	0.00251831	1	0	0.00251831	-3.02113	0.378843
331.9	-0.117162	-0.193275	-0.0410488	0.00255243	1	0	0.00255243	-3.01706	0.353484
571.8	-0.16379	-0.272368	-0.0552116	0.00311	1	0	0.00311	-2.95665	0.484269
394.3	-0.0819274	-0.137118	-0.0267374	0.0036196	1	0	0.0036196	-2.90954	0.238371
292.6	-0.154337	-0.258637	-0.0500364	0.00372828	1	0	0.00372828	-2.90028	0.447619
571.6	-0.18278	-0.307663	-0.0578959	0.00412223	1	0	0.00412223	-2.86865	0.524331
559	-0.0926574	-0.15691	-0.0284046	0.00470647	1	0	0.00470647	-2.82647	0.261893
747.13	-0.0688246	-0.116564	-0.0210849	0.00471835	1	0	0.00471835	-2.82566	0.194475
433.12	-0.176546	-0.299089	-0.0540038	0.0047464	1	0	0.0047464	-2.82376	0.498525
592.12	-0.116023	-0.196803	-0.0352424	0.00487623	1	0	0.00487623	-2.8151	0.326615
287.31	-0.160828	-0.274036	-0.04762	0.00536174	1	0	0.00536174	-2.78446	0.447819
184.2	-0.138448	-0.241375	-0.0355201	0.00837927	1	0	0.00837927	-2.63639	0.365002
198.6	-0.0589438	-0.103081	-0.0148064	0.00885759	1	0	0.00885759	-2.6175	0.154286
528.11	-0.140993	-0.248214	-0.033771	0.00995667	1	0	0.00995667	-2.57733	0.363385
480.5	-0.152366	-0.272428	-0.0323051	0.0128688	1	0	0.0128688	-2.48738	0.378993
276.42	-0.149142	-0.268148	-0.0301366	0.0140359	1	0	0.0140359	-2.45634	0.366345
592.13	-0.157606	-0.284024	-0.0311874	0.0145443	1	0	0.0145443	-2.44353	0.385115
580.2	-0.139288	-0.252722	-0.0258545	0.0160959	1	0	0.0160959	-2.40673	0.33523
198.5	-0.0825981	-0.150466	-0.0147303	0.0170602	1	0	0.0170602	-2.38541	0.19703
290.11	-0.0608186	-0.111436	-0.0102008	0.0185231	1	0	0.0185231	-2.35499	0.143227
331.1	-0.108152	-0.198293	-0.0180118	0.0186906	1	0	0.0186906	-2.35164	0.254336
384.4	-0.110266	-0.204124	-0.0164086	0.0212982	1	0	0.0212982	-2.30266	0.253905
430.2	-0.0877625	-0.162751	-0.0127742	0.0217972	1	0	0.0217972	-2.29388	0.201317
853	-0.125961	-0.233953	-0.017969	0.0222467	1	0	0.0222467	-2.28613	0.287963
697	-0.116929	-0.218376	-0.015483	0.0238747	1	0	0.0238747	-2.25914	0.26416
441.1	-0.135574	-0.253552	-0.0175958	0.0243019	1	0	0.0243019	-2.25232	0.305356
427.42	-0.0853931	-0.163552	-0.00723398	0.0322412	1	0	0.0322412	-2.14141	0.182861
150	-0.106562	-0.207056	-0.0060679	0.0376775	1	0	0.0376775	-2.07835	0.221472
624.2	0.0792631	0.00266968	0.155856	0.042528	1	0	0.042528	2.02832	0.160771
751.11	0.118324	0.00159416	0.235054	0.0469482	1	0	0.0469482	1.98677	0.235082
791	-0.0931284	-0.186107	-0.00014969	0.0496281	1	0	0.0496281	-1.96316	0.182826
426.24	-0.0892351	-0.179152	0.000681435	0.0517574	1	0	0.0517574	-1.94515	0.173575
189.21	-0.0673498	-0.136499	0.0017997	0.0562636	1	0	0.0562636	-1.90899	0.12857
70.4	-0.107329	-0.230737	0.0160785	0.0882623	1	0	0.0882623	-1.70464	0.182957
202.24	-0.081573	-0.176206	0.01306	0.0911224	1	0	0.0911224	-1.68951	0.137818
426.23	-0.0837675	-0.185539	0.0180039	0.106687	1	0	0.106687	-1.61327	0.135139
836	-0.0984781	-0.218275	0.0213186	0.107135	1	0	0.107135	-1.6112	0.158668
344	-0.0817565	-0.184518	0.0210051	0.11891	1	0	0.11891	-1.55936	0.127488
385.3	-0.0982616	-0.221961	0.025438	0.119485	1	0	0.119485	-1.55694	0.152987
614.53	0.0690964	-0.0291295	0.167322	0.167972	1	0	0.167972	1.37875	0.0952666
520.2	-0.0489246	-0.125866	0.0280172	0.212656	1	0	0.212656	-1.2463	0.0609745
818	0.04973	-0.0298633	0.129323	0.220722	1	0	0.220722	1.22461	0.0609
252.2	0.0716132	-0.0551212	0.198348	0.268066	1	0	0.268066	1.10753	0.0793136
569.1	-0.0565694	-0.161048	0.0479096	0.288586	1	0	0.288586	-1.06123	0.0600331
285.22	-0.0536641	-0.160699	0.0533704	0.32576	1	0	0.32576	-0.982689	0.0527352
962.3	-0.0499432	-0.15586	0.0559733	0.355379	1	0	0.355379	-0.924206	0.0461578
159.4	0.0513951	-0.0703069	0.173097	0.407833	1	0	0.407833	0.827714	0.0425405
191.11	0.0466269	-0.0641973	0.157451	0.409583	1	0	0.409583	0.824628	0.0384499
189.2	0.0461909	-0.0686232	0.161005	0.430388	1	0	0.430388	0.788529	0.0364228
151	-0.0436498	-0.15511	0.0678105	0.442743	1	0	0.442743	-0.76757	0.0335043
155	-0.0485054	-0.175556	0.0785453	0.454286	1	0	0.454286	-0.748289	0.036296
253.7	-0.0456411	-0.171136	0.0798534	0.47595	1	0	0.47595	-0.712832	0.0325344
870.5	0.0379892	-0.0784975	0.154476	0.52269	1	0	0.52269	0.639205	0.0242829
586.4	-0.0256411	-0.106505	0.055223	0.534275	1	0	0.534275	-0.621493	0.0159357
332	0.0184188	-0.0401924	0.0770301	0.537935	1	0	0.537935	0.615938	0.0113449
368.3	-0.033852	-0.145527	0.0778229	0.552422	1	0	0.552422	-0.594134	0.0201126
715.2	0.0350303	-0.0847676	0.154828	0.566559	1	0	0.566559	0.573126	0.0200768
227.2	-0.0275813	-0.125085	0.0699225	0.579283	1	0	0.579283	-0.554433	0.015292
157	0.0180584	-0.0600289	0.0961458	0.650355	1	0	0.650355	0.453269	0.00818533
202.21	-0.0256214	-0.151116	0.0998733	0.689039	1	0	0.689039	-0.40016	0.0102527
531.1	-0.0240939	-0.144158	0.0959706	0.694082	1	0	0.694082	-0.393322	0.00947666
348.2	-0.0207433	-0.134634	0.0931471	0.721105	1	0	0.721105	-0.356983	0.007405
411.41	0.0135882	-0.076218	0.103394	0.766803	1	0	0.766803	0.29656	0.00402972
348.7	0.0168899	-0.105943	0.139722	0.78754	1	0	0.78754	0.269507	0.00455193
575.1	-0.0103824	-0.0962283	0.0754634	0.812619	1	0	0.812619	-0.237048	0.00246114
870.1	0.011281	-0.0955652	0.118127	0.836057	1	0	0.836057	0.20694	0.00233448
204.4	-0.00915968	-0.101527	0.0832073	0.845889	1	0	0.845889	-0.194366	0.00178033
204.12	0.0103292	-0.102659	0.123318	0.857797	1	0	0.857797	0.17918	0.00185078
361.1	0.00550876	-0.0668435	0.077861	0.881372	1	0	0.881372	0.149231	0.000822077
189.11	-0.00512215	-0.0893589	0.0791146	0.905132	1	0	0.905132	-0.119181	0.000610463
379.5	-0.00497954	-0.100274	0.0903148	0.918424	1	0	0.918424	-0.102419	0.000509997
386.1	-0.002402	-0.0868234	0.0820194	0.955527	1	0	0.955527	-0.055767	0.000133953

## Sheet: AFR_meta_EWPS_results
Variable	Estimate	CI_lower	CI_upper	p_value	k_value	i2_value	p_value2	Z_value	SE_value
626	-0.723299	-0.77279	-0.673808	1.8806e-180	2	99.5105	1.8806e-180	-28.6444	20.7185
626.1	-0.776222	-0.82923	-0.723215	3.68923e-181	2	99.4194	3.68923e-181	-28.7012	22.2785
627.2	-0.585126	-0.635284	-0.534967	1.06166e-115	2	98.6143	1.06166e-115	-22.864	13.3783
626.12	-0.82977	-0.903413	-0.756127	0	1	0	5e-302	-37.1465	30.823
627	-0.463676	-0.512937	-0.414415	5.36463e-76	2	98.9374	5.36463e-76	-18.4485	8.55411
626.13	-0.893218	-0.979064	-0.807372	0	1	0	5e-302	-37.1465	33.1799
614	-0.441466	-0.493028	-0.389905	3.34786e-63	2	96.3028	3.34786e-63	-16.7812	7.40835
626.11	-0.906713	-1.00824	-0.805182	0	1	0	5e-302	-37.1465	33.6812
614.52	-0.476896	-0.532458	-0.421335	1.66158e-63	2	94.8967	1.66158e-63	-16.8228	8.02272
614.5	-0.438358	-0.490995	-0.385721	6.82477e-60	2	96.0632	6.82477e-60	-16.3225	7.15511
218	-0.344725	-0.398796	-0.290653	7.90145e-36	2	98.9041	7.90145e-36	-12.4955	4.3075
743	0.354128	0.300368	0.407887	3.91267e-38	2	98.6403	3.91267e-38	12.9108	4.57207
218.1	-0.343067	-0.397286	-0.288849	2.55872e-35	2	98.8993	2.55872e-35	-12.4017	4.25461
626.2	-0.901791	-1.0194	-0.784183	0	1	0	5e-302	-37.1465	33.4983
366	0.36326	0.312659	0.413861	5.76961e-45	2	95.6486	5.76961e-45	14.0705	5.11123
628	-0.575709	-0.655336	-0.496083	0	1	0	5e-302	-37.1465	21.3856
627.4	-0.908113	-1.03392	-0.782309	0	1	0	5e-302	-37.1465	33.7332
625	-0.412306	-0.470355	-0.354257	4.72386e-44	2	87.7262	4.72386e-44	-13.921	5.7397
743.11	0.489367	0.418754	0.559981	0	1	0	5e-302	37.1465	18.1783
743.1	0.48201	0.412167	0.551853	0	1	0	5e-302	37.1465	17.905
792	-0.481124	-0.554785	-0.407462	0	1	0	5e-302	-37.1465	17.872
733	0.270464	0.217818	0.32311	7.55954e-24	2	98.1611	7.55954e-24	10.0692	2.72335
340	-0.419986	-0.48895	-0.351022	0	1	0	5e-302	-37.1465	15.601
272	0.297093	0.244183	0.350004	3.60768e-28	2	95.2089	3.60768e-28	11.0052	3.26957
619	-0.298039	-0.349583	-0.246494	9.02526e-30	2	92.6595	9.02526e-30	-11.3328	3.37762
300	-0.326207	-0.379985	-0.272429	0	1	0	5e-302	-37.1465	12.1174
272.1	0.295325	0.242429	0.34822	7.19173e-28	2	95.158	7.19173e-28	10.9428	3.23169
300.9	-0.62867	-0.734276	-0.523064	0	1	0	5e-302	-37.1465	23.3529
366.2	0.287133	0.233996	0.340269	3.27759e-26	2	92.1092	3.27759e-26	10.5911	3.04105
296	-0.303262	-0.356721	-0.249803	0	1	0	5e-302	-37.1465	11.2651
112	-0.319044	-0.377202	-0.260887	5.79396e-27	2	85.1145	5.79396e-27	-10.7521	3.43039
131	-0.633842	-0.748442	-0.519243	0	1	0	5e-302	-37.1465	23.545
615	-0.638019	-0.757058	-0.51898	0	1	0	5e-302	-37.1465	23.7001
562	0.272554	0.218421	0.326688	5.72442e-23	2	89.7982	5.72442e-23	9.86809	2.68959
465.2	-0.323558	-0.385299	-0.261817	0	1	0	5e-302	-37.1465	12.019
562.1	0.276998	0.222146	0.331849	4.2587e-23	2	88.6326	4.2587e-23	9.89772	2.74164
740	0.24165	0.189907	0.293392	5.51147e-20	2	95.4051	5.51147e-20	9.15351	2.21194
296.2	-0.278334	-0.332207	-0.224462	0	1	0	5e-302	-37.1465	10.3391
740.11	0.228077	0.17846	0.277694	2.07088e-19	2	95.3676	2.07088e-19	9.00945	2.05485
300.1	-0.283031	-0.338097	-0.227966	0	1	0	5e-302	-37.1465	10.5136
401.2	0.235724	0.177505	0.293943	2.0929e-15	2	97.8832	2.0929e-15	7.93571	1.87064
743.9	0.35203	0.28275	0.42131	0	1	0	5e-302	37.1465	13.0767
411.4	0.250824	0.189864	0.311784	7.35922e-16	2	97.4444	7.35922e-16	8.06441	2.02275
740.1	0.225736	0.175908	0.275565	6.73833e-19	2	94.2176	6.73833e-19	8.87913	2.00434
180.3	-0.517881	-0.621811	-0.413951	0	1	0	5e-302	-37.1465	19.2375
296.22	-0.275254	-0.33058	-0.219929	0	1	0	5e-302	-37.1465	10.2247
619.4	-0.318911	-0.383639	-0.254183	0	1	0	5e-302	-37.1465	11.8464
706.1	-0.468003	-0.563665	-0.372341	0	1	0	5e-302	-37.1465	17.3847
792.1	-0.437395	-0.527386	-0.347405	0	1	0	5e-302	-37.1465	16.2477
433	0.231273	0.172098	0.290447	1.85749e-14	2	97.2689	1.85749e-14	7.66013	1.77158
782.6	-0.506305	-0.611822	-0.400789	0	1	0	5e-302	-37.1465	18.8074
395.2	0.55776	0.441336	0.674184	0	1	0	5e-302	37.1465	20.7188
585.33	0.389434	0.306962	0.471906	0	1	0	5e-302	37.1465	14.4661
440	0.417389	0.325815	0.508962	0	1	0	5e-302	37.1465	15.5045
465	-0.22586	-0.275393	-0.176327	3.99724e-19	2	65.8506	3.99724e-19	-8.93704	2.01852
300.12	-0.499964	-0.610609	-0.389319	0	1	0	5e-302	-37.1465	18.5719
278.4	-0.40796	-0.498995	-0.316925	0	1	0	5e-302	-37.1465	15.1543
272.11	0.205037	0.152794	0.257281	1.44692e-14	2	94.7486	1.44692e-14	7.69214	1.57718
1011	0.28085	0.218063	0.343638	0	1	0	5e-302	37.1465	10.4326
180	-0.440385	-0.539384	-0.341387	0	1	0	5e-302	-37.1465	16.3588
208	0.199896	0.148585	0.251207	2.24849e-14	2	93.5911	2.24849e-14	7.63556	1.52631
395	0.321529	0.247712	0.395346	0	1	0	5e-302	37.1465	11.9437
401	0.255695	0.194363	0.317027	3.05321e-16	2	83.4262	3.05321e-16	8.17121	2.08934
614.51	-0.469377	-0.580134	-0.35862	0	1	0	5e-302	-37.1465	17.4357
316	-0.304522	-0.37684	-0.232204	2.22045e-16	1	0	2.22045e-16	-8.20954	2.49998
296.1	-0.441895	-0.54781	-0.33598	2.22045e-16	1	0	2.22045e-16	-8.20954	3.62776
411	0.179445	0.124154	0.234736	2.00413e-10	2	97.1196	2.00413e-10	6.36102	1.14145
627.1	-0.255173	-0.31696	-0.193386	6.66134e-16	1	0	6.66134e-16	-8.07657	2.06092
401.22	0.32479	0.245852	0.403729	6.66134e-16	1	0	6.66134e-16	8.07657	2.62319
433.1	0.401966	0.304067	0.499865	8.88178e-16	1	0	8.88178e-16	8.0414	3.23237
317	-0.378648	-0.471245	-0.286051	1.11022e-15	1	0	1.11022e-15	-8.01402	3.03449
740.2	0.323261	0.244206	0.402316	1.11022e-15	1	0	1.11022e-15	8.01402	2.59062
740.9	0.161982	0.112125	0.211839	1.9175e-10	2	96.7627	1.9175e-10	6.36781	1.03147
720.1	0.289623	0.218282	0.360963	1.77636e-15	1	0	1.77636e-15	7.95604	2.30425
317.1	-0.395241	-0.49582	-0.294663	1.33227e-14	1	0	1.33227e-14	-7.70269	3.04442
586	0.264645	0.196702	0.332588	2.26485e-14	1	0	2.26485e-14	7.63462	2.02046
433.3	0.304944	0.226326	0.383562	2.90878e-14	1	0	2.90878e-14	7.60232	2.31828
401.1	0.225875	0.165257	0.286492	2.80871e-13	2	76.8674	2.80871e-13	7.30326	1.64962
250.22	0.322581	0.239265	0.405898	3.24185e-14	1	0	3.24185e-14	7.58828	2.44784
440.9	0.462625	0.342675	0.582574	4.04121e-14	1	0	4.04121e-14	7.55966	3.49729
624	-0.268014	-0.338111	-0.197917	6.68354e-14	1	0	6.68354e-14	-7.49394	2.00848
79	-0.246071	-0.30685	-0.185292	2.10217e-15	2	0	2.10217e-15	-7.93516	1.95262
617	-0.271595	-0.34333	-0.199859	1.16573e-13	1	0	1.16573e-13	-7.42062	2.0154
306	-0.292737	-0.370123	-0.215351	1.22347e-13	1	0	1.22347e-13	-7.41422	2.17042
300.11	-0.31508	-0.398488	-0.231671	1.32117e-13	1	0	1.32117e-13	-7.40403	2.33286
365	0.209167	0.149251	0.269083	7.79518e-12	2	86.1562	7.79518e-12	6.84226	1.43118
427.21	0.394102	0.287553	0.500651	4.17888e-13	1	0	4.17888e-13	7.24964	2.8571
428.4	0.33187	0.242134	0.421607	4.20997e-13	1	0	4.20997e-13	7.24863	2.40561
379.2	0.281195	0.20367	0.35872	1.16662e-12	1	0	1.16662e-12	7.10927	1.99909
612	-0.445154	-0.56837	-0.321937	1.43063e-12	1	0	1.43063e-12	-7.08105	3.15216
427.2	0.374935	0.27094	0.47893	1.58962e-12	1	0	1.58962e-12	7.06644	2.64946
365.11	0.426125	0.305825	0.546424	3.84648e-12	1	0	3.84648e-12	6.94271	2.95846
278.11	-0.163129	-0.215204	-0.111055	8.2618e-10	2	89.4988	8.2618e-10	-6.13981	1.00158
585	0.143459	0.0887102	0.198208	2.81092e-07	2	96.5064	2.81092e-07	5.1357	0.736764
1010	-0.188125	-0.244321	-0.131928	5.33807e-11	2	73.5096	5.33807e-11	-6.56119	1.23432
362.2	0.369227	0.26308	0.475374	9.24594e-12	1	0	9.24594e-12	6.81778	2.51731
380.4	0.256889	0.182646	0.331132	1.18663e-11	1	0	1.18663e-11	6.78183	1.74218
720	0.217956	0.154697	0.281216	1.44764e-11	1	0	1.44764e-11	6.75305	1.47187
702.2	0.285377	0.201743	0.369012	2.26379e-11	1	0	2.26379e-11	6.68791	1.90858
785	-0.190001	-0.241347	-0.138654	4.08813e-13	2	0	4.08813e-13	-7.25261	1.378
464	-0.195266	-0.255916	-0.134616	2.78581e-10	2	78.0739	2.78581e-10	-6.31025	1.23218
300.4	-0.303207	-0.393028	-0.213386	3.68245e-11	1	0	3.68245e-11	-6.61632	2.00612
394	0.351993	0.247185	0.4568	4.62281e-11	1	0	4.62281e-11	6.5826	2.31703
428	0.241643	0.169515	0.313772	5.15568e-11	1	0	5.15568e-11	6.56637	1.58672
339	-0.184173	-0.234011	-0.134335	4.39294e-13	2	0	4.39294e-13	-7.24287	1.33394
54	-0.301891	-0.392989	-0.210793	8.28833e-11	1	0	8.28833e-11	-6.49527	1.96086
841	-0.279562	-0.364699	-0.194425	1.22661e-10	1	0	1.22661e-10	-6.436	1.79926
702	0.268621	0.186782	0.35046	1.24841e-10	1	0	1.24841e-10	6.43333	1.72813
401.21	0.256004	0.177726	0.334282	1.45465e-10	1	0	1.45465e-10	6.41006	1.641
402	-0.270689	-0.353622	-0.187755	1.58153e-10	1	0	1.58153e-10	-6.3973	1.73168
250.7	0.287824	0.199509	0.376139	1.68345e-10	1	0	1.68345e-10	6.38775	1.83855
304	-0.225255	-0.294455	-0.156055	1.76995e-10	1	0	1.76995e-10	-6.38008	1.43715
250.23	0.282753	0.195802	0.369703	1.84513e-10	1	0	1.84513e-10	6.37371	1.80218
704	-0.21296	-0.278861	-0.147059	2.39288e-10	1	0	2.39288e-10	-6.33374	1.34883
840	-0.148111	-0.200233	-0.0959893	2.55479e-08	2	89.4504	2.55479e-08	-5.56949	0.824904
429	0.176231	0.113207	0.239255	4.24e-08	2	89.57	4.24e-08	5.48055	0.965843
514	0.106295	0.0507782	0.161812	0.00017499	2	97.8956	0.00017499	3.75263	0.398887
41	-0.200132	-0.260932	-0.139333	1.10682e-10	2	0	1.10682e-10	-6.45159	1.29117
585.3	0.206311	0.140543	0.272078	7.82476e-10	1	0	7.82476e-10	6.14844	1.26849
250	0.148089	0.0969848	0.199193	1.35036e-08	2	80.509	1.35036e-08	5.67957	0.841081
619.2	-0.32934	-0.435283	-0.223398	1.1082e-09	1	0	1.1082e-09	-6.09299	2.00667
447	0.328352	0.221134	0.435571	1.94363e-09	1	0	1.94363e-09	6.00245	1.97092
681	-0.170614	-0.227712	-0.113517	4.72397e-09	2	58.8967	4.72397e-09	-5.85661	0.999221
522	-0.35921	-0.477835	-0.240584	2.93686e-09	1	0	2.93686e-09	-5.93509	2.13194
586.2	0.281344	0.188359	0.374329	3.02251e-09	1	0	3.02251e-09	5.93037	1.66848
350.2	0.23586	0.157423	0.314298	3.77708e-09	1	0	3.77708e-09	5.89367	1.39008
272.13	0.152204	0.0928583	0.21155	4.9897e-07	2	89.1199	4.9897e-07	5.02671	0.765087
521	-0.294629	-0.393953	-0.195306	6.09665e-09	1	0	6.09665e-09	-5.81408	1.713
789	-0.189194	-0.240872	-0.137516	7.20416e-13	2	75.2833	7.20416e-13	-7.1755	1.35756
78	-0.28501	-0.381954	-0.188066	8.29778e-09	1	0	8.29778e-09	-5.76229	1.64231
389.1	0.226692	0.149477	0.303908	8.70296e-09	1	0	8.70296e-09	5.75425	1.30444
495	-0.166817	-0.220112	-0.113522	8.5244e-10	2	0	8.5244e-10	-6.13484	1.0234
728	-0.211377	-0.283894	-0.138861	1.10881e-08	1	0	1.10881e-08	-5.71319	1.20764
365.1	0.260184	0.170863	0.349504	1.13433e-08	1	0	1.13433e-08	5.70931	1.48547
429.3	0.227082	0.148622	0.305541	1.40525e-08	1	0	1.40525e-08	5.67275	1.28818
369.5	-0.224198	-0.301724	-0.146672	1.4433e-08	1	0	1.4433e-08	-5.66817	1.27079
389	0.128565	0.0711128	0.186017	1.15477e-05	2	94.0549	1.15477e-05	4.38596	0.56388
457.3	0.19167	0.125065	0.258274	1.6971e-08	1	0	1.6971e-08	5.64034	1.08108
274	0.273323	0.178137	0.368509	1.82254e-08	1	0	1.82254e-08	5.62805	1.53828
414	0.288092	0.187733	0.38845	1.83987e-08	1	0	1.83987e-08	5.62642	1.62093
416	0.218343	0.142279	0.294408	1.84247e-08	1	0	1.84247e-08	5.62618	1.22844
738.4	0.231821	0.150448	0.313193	2.35303e-08	1	0	2.35303e-08	5.58381	1.29444
443.9	0.261676	0.169719	0.353634	2.44087e-08	1	0	2.44087e-08	5.57744	1.45948
415.2	0.274224	0.177711	0.370737	2.56197e-08	1	0	2.56197e-08	5.56901	1.52716
728.7	-0.213791	-0.289353	-0.138229	2.93031e-08	1	0	2.93031e-08	-5.54555	1.18559
622	-0.257459	-0.348952	-0.165967	3.47916e-08	1	0	3.47916e-08	-5.51544	1.42
514.2	0.232778	0.149947	0.31561	3.62703e-08	1	0	3.62703e-08	5.50811	1.28217
521.1	-0.285363	-0.387054	-0.183673	3.79467e-08	1	0	3.79467e-08	-5.50015	1.56954
483	-0.193584	-0.262799	-0.124368	4.21166e-08	1	0	4.21166e-08	-5.48174	1.06117
585.31	-0.296512	-0.402848	-0.190175	4.621e-08	1	0	4.621e-08	-5.46531	1.62053
495.2	-0.231085	-0.314052	-0.148117	4.78561e-08	1	0	4.78561e-08	-5.4591	1.26151
303	-0.335596	-0.456855	-0.214338	5.81121e-08	1	0	5.81121e-08	-5.42451	1.82045
369	-0.203724	-0.277635	-0.129813	6.57532e-08	1	0	6.57532e-08	-5.40241	1.1006
522.5	-0.357408	-0.487884	-0.226932	7.92005e-08	1	0	7.92005e-08	-5.36894	1.9189
930	-0.341313	-0.466649	-0.215977	9.42601e-08	1	0	9.42601e-08	-5.33746	1.82174
443	0.229084	0.144821	0.313346	9.89629e-08	1	0	9.89629e-08	5.32862	1.2207
381.1	-0.232336	-0.317811	-0.146861	9.95109e-08	1	0	9.95109e-08	-5.32761	1.2378
274.1	0.271256	0.171116	0.371396	1.10107e-07	1	0	1.10107e-07	5.3092	1.44015
395.3	0.333305	0.209794	0.456816	1.22823e-07	1	0	1.22823e-07	5.28924	1.76293
362	0.197816	0.124266	0.271366	1.35295e-07	1	0	1.35295e-07	5.27153	1.04279
619.1	-0.353433	-0.485165	-0.221702	1.45121e-07	1	0	1.45121e-07	-5.25865	1.85858
79.9	-0.297963	-0.409031	-0.186894	1.45564e-07	1	0	1.45564e-07	-5.25808	1.56671
704.8	-0.295929	-0.40664	-0.185218	1.6142e-07	1	0	1.6142e-07	-5.23903	1.55038
840.3	-0.215431	-0.296355	-0.134507	1.81057e-07	1	0	1.81057e-07	-5.2178	1.12408
585.1	0.126456	0.0606568	0.192254	0.000165377	2	94.1931	0.000165377	3.76676	0.476329
622.1	-0.264073	-0.364747	-0.163399	2.73019e-07	1	0	2.73019e-07	-5.14118	1.35765
295	-0.307003	-0.424201	-0.189805	2.83234e-07	1	0	2.83234e-07	-5.13427	1.57624
174	0.22131	0.136819	0.305801	2.83787e-07	1	0	2.83787e-07	5.13391	1.13618
793	0.173285	0.106665	0.239905	3.43001e-07	1	0	3.43001e-07	5.09814	0.883431
215	-0.279493	-0.387152	-0.171833	3.61243e-07	1	0	3.61243e-07	-5.08832	1.42215
250.2	0.117558	0.0677313	0.167384	3.75966e-06	2	75.4241	3.75966e-06	4.62424	0.543615
476	-0.140732	-0.191922	-0.0895416	7.11231e-08	2	0	7.11231e-08	-5.38831	0.758307
280.2	-0.246291	-0.344141	-0.148441	8.08227e-07	1	0	8.08227e-07	-4.93337	1.21504
278	-0.129137	-0.182435	-0.0758383	2.0463e-06	2	47.9746	2.0463e-06	-4.7488	0.613244
790.6	0.100108	0.0445512	0.155665	0.000412953	2	94.1656	0.000412953	3.53166	0.353548
381.11	-0.244396	-0.343213	-0.145578	1.25047e-06	1	0	1.25047e-06	-4.84747	1.1847
395.1	0.217978	0.128992	0.306965	1.57755e-06	1	0	1.57755e-06	4.80115	1.04655
278.1	-0.121214	-0.172581	-0.0698463	3.74578e-06	2	44.8351	3.74578e-06	-4.62501	0.560614
174.11	0.218654	0.129154	0.308154	1.68109e-06	1	0	1.68109e-06	4.78841	1.04701
275.6	0.255975	0.151086	0.360865	1.72475e-06	1	0	1.72475e-06	4.78326	1.2244
174.1	0.213615	0.125373	0.301857	2.08781e-06	1	0	2.08781e-06	4.74473	1.01355
611.3	-0.140636	-0.196498	-0.0847736	8.04407e-07	2	0	8.04407e-07	-4.9343	0.69394
389.4	0.214192	0.125536	0.302849	2.1871e-06	1	0	2.1871e-06	4.73532	1.01427
705	-0.204363	-0.289245	-0.119482	2.37056e-06	1	0	2.37056e-06	-4.71896	0.964382
110.12	-0.271496	-0.384488	-0.158504	2.48346e-06	1	0	2.48346e-06	-4.70948	1.27861
355	-0.205766	-0.29152	-0.120012	2.56343e-06	1	0	2.56343e-06	-4.70302	0.967723
350	0.0984449	0.042971	0.153919	0.000504827	2	93.621	0.000504827	3.47818	0.342409
681.7	-0.267259	-0.379313	-0.155205	2.94268e-06	1	0	2.94268e-06	-4.67478	1.24938
277	-0.175288	-0.248844	-0.101731	3.00085e-06	1	0	3.00085e-06	-4.67076	0.818728
374	0.208067	0.120625	0.29551	3.10472e-06	1	0	3.10472e-06	4.66377	0.970378
591	-0.151778	-0.204456	-0.0991013	1.63048e-08	2	59.5791	1.63048e-08	-5.64724	0.857129
618	0.239507	0.138388	0.340627	3.44441e-06	1	0	3.44441e-06	4.64237	1.11188
367.1	-0.166498	-0.243677	-0.0893195	2.35517e-05	2	73.9153	2.35517e-05	-4.22825	0.703996
276.13	0.248022	0.142816	0.353229	3.82487e-06	1	0	3.82487e-06	4.62068	1.14603
433.21	0.233546	0.134088	0.333005	4.17594e-06	1	0	4.17594e-06	4.60243	1.07488
721.1	0.0887662	0.0373567	0.140176	0.000713932	2	93.5007	0.000713932	3.38417	0.3004
738	0.181905	0.104236	0.259573	4.42354e-06	1	0	4.42354e-06	4.59042	0.835018
456	0.219157	0.125529	0.312784	4.47863e-06	1	0	4.47863e-06	4.58784	1.00546
681.1	-0.274789	-0.393602	-0.155976	5.81366e-06	1	0	5.81366e-06	-4.53306	1.24563
136	-0.226262	-0.324152	-0.128371	5.88981e-06	1	0	5.88981e-06	-4.53031	1.02503
558	-0.178543	-0.256218	-0.100868	6.63064e-06	1	0	6.63064e-06	-4.50521	0.804374
427.3	0.171404	0.0960723	0.246736	8.21043e-06	1	0	8.21043e-06	4.45962	0.764399
433.2	0.221408	0.12339	0.319426	9.54049e-06	1	0	9.54049e-06	4.42733	0.980246
793.2	0.168182	0.0935976	0.242766	9.8861e-06	1	0	9.8861e-06	4.41965	0.743305
379	0.106901	0.0483006	0.165502	0.00034966	2	87.7729	0.00034966	3.57542	0.382218
770	-0.143733	-0.197417	-0.0900495	1.54087e-07	2	40.3326	1.54087e-07	-5.24761	0.754257
947	-0.228808	-0.331026	-0.12659	1.14758e-05	1	0	1.14758e-05	-4.38732	1.00385
427.6	0.252395	0.139366	0.365423	1.2048e-05	1	0	1.2048e-05	4.37672	1.10466
721	0.0802229	0.0290988	0.131347	0.00210123	2	93.9269	0.00210123	3.07554	0.246729
695.4	-0.290375	-0.420684	-0.160065	1.25645e-05	1	0	1.25645e-05	-4.36756	1.26823
599.3	-0.155595	-0.214747	-0.0964435	2.52864e-07	2	6.50799	2.52864e-07	-5.15557	0.802182
433.31	0.190686	0.104528	0.276843	1.43831e-05	1	0	1.43831e-05	4.33793	0.827181
285.21	0.267707	0.145821	0.389594	1.67084e-05	1	0	1.67084e-05	4.30487	1.15244
939	-0.121004	-0.173932	-0.0680757	7.43423e-06	2	0	7.43423e-06	-4.48086	0.542201
427.1	0.250794	0.135381	0.366206	2.05227e-05	1	0	2.05227e-05	4.25913	1.06816
497	-0.162068	-0.236794	-0.0873416	2.12928e-05	1	0	2.12928e-05	-4.25088	0.688932
790	0.0746783	0.0205927	0.128764	0.00680572	2	94.9598	0.00680572	2.7062	0.202095
250.25	0.226812	0.121566	0.332058	2.4009e-05	1	0	2.4009e-05	4.22392	0.958035
916	-0.145222	-0.20515	-0.0852929	2.03961e-06	2	0	2.03961e-06	-4.74946	0.689725
835	-0.184511	-0.27106	-0.0979621	2.93477e-05	1	0	2.93477e-05	-4.17847	0.770973
275	0.0829349	0.0203386	0.145531	0.00940995	2	94.3812	0.00940995	2.59679	0.215364
327.4	-0.137281	-0.193326	-0.081236	1.5796e-06	2	0	1.5796e-06	-4.80089	0.659071
564.8	0.207981	0.110057	0.305905	3.14301e-05	1	0	3.14301e-05	4.16285	0.865794
345	-0.216172	-0.318005	-0.11434	3.17229e-05	1	0	3.17229e-05	-4.16073	0.899435
280	-0.105131	-0.16172	-0.0485421	0.000271351	2	76.1406	0.000271351	-3.64122	0.382806
428.1	0.17321	0.0914695	0.254951	3.27753e-05	1	0	3.27753e-05	4.15327	0.71939
292.3	0.193743	0.101163	0.286323	4.1012e-05	1	0	4.1012e-05	4.1017	0.794676
428.3	0.22769	0.117554	0.337825	5.07738e-05	1	0	5.07738e-05	4.05204	0.922606
250.24	0.154284	0.0790114	0.229557	5.88559e-05	1	0	5.88559e-05	4.01735	0.619813
1005	-0.134156	-0.191161	-0.0771507	3.97707e-06	2	0	3.97707e-06	-4.61258	0.618804
782.3	0.0901292	0.0382168	0.142042	0.00066687	2	78.1776	0.00066687	3.40285	0.306696
345.3	-0.226015	-0.33759	-0.11444	7.17704e-05	1	0	7.17704e-05	-3.97034	0.897357
355.1	-0.183218	-0.273937	-0.0924997	7.54272e-05	1	0	7.54272e-05	-3.95848	0.725266
362.3	0.234368	0.117461	0.351276	8.52036e-05	1	0	8.52036e-05	3.92927	0.920896
411.2	0.18368	0.0915655	0.275795	9.29409e-05	1	0	9.29409e-05	3.90832	0.71788
327	-0.128363	-0.178208	-0.0785186	4.47826e-07	2	76.6659	4.47826e-07	-5.04742	0.647904
561.1	-0.154515	-0.210881	-0.0981486	7.75281e-08	2	84.7761	7.75281e-08	-5.37279	0.830175
578.9	0.225713	0.111666	0.339761	0.000104858	1	0	0.000104858	3.87907	0.875557
783	-0.140518	-0.211797	-0.0692401	0.000111567	1	0	0.000111567	-3.86395	0.542956
351	-0.118855	-0.172465	-0.0652452	1.39075e-05	2	0	1.39075e-05	-4.34532	0.516463
110.13	-0.25757	-0.389487	-0.125653	0.000129747	1	0	0.000129747	-3.82694	0.985705
263	-0.21028	-0.318235	-0.102326	0.000134641	1	0	0.000134641	-3.81781	0.802811
381	-0.14955	-0.226329	-0.072771	0.000134707	1	0	0.000134707	-3.81769	0.570935
704.1	-0.152477	-0.230927	-0.0740272	0.00013925	1	0	0.00013925	-3.8095	0.580862
380	0.128746	0.062095	0.195398	0.000153082	1	0	0.000153082	3.78601	0.487436
716.9	0.0829673	0.0251479	0.140787	0.00491688	2	88.1611	0.00491688	2.81243	0.23334
525	-0.179517	-0.274039	-0.084995	0.000197301	1	0	0.000197301	-3.72245	0.668243
842	-0.245109	-0.374297	-0.115921	0.000200247	1	0	0.000200247	-3.7187	0.911488
627.5	0.18217	0.0859249	0.278415	0.000207392	1	0	0.000207392	3.70984	0.67582
346.1	0.232152	0.109462	0.354842	0.000208351	1	0	0.000208351	3.70867	0.860974
241.2	0.160919	0.0753071	0.246531	0.000229532	1	0	0.000229532	3.68408	0.592839
426	0.0639069	0.00737047	0.120443	0.0267273	2	93.3239	0.0267273	2.21548	0.141584
512.2	-0.145209	-0.223408	-0.0670107	0.000273077	1	0	0.000273077	-3.63959	0.528501
280.1	-0.0930904	-0.151388	-0.0347927	0.00174991	2	70.2336	0.00174991	-3.12969	0.291344
327.3	-0.123664	-0.176582	-0.070747	4.6431e-06	2	58.0623	4.6431e-06	-4.5803	0.56642
523	-0.208133	-0.321622	-0.0946435	0.00032498	1	0	0.00032498	-3.59453	0.748138
415	0.14701	0.066724	0.227296	0.000332052	1	0	0.000332052	3.58892	0.527606
590	-0.229392	-0.35494	-0.103844	0.000342069	1	0	0.000342069	-3.58116	0.821489
496	0.118658	0.0529084	0.184407	0.000404381	1	0	0.000404381	3.53721	0.419718
706	-0.121542	-0.178543	-0.0645405	2.9258e-05	2	0	2.9258e-05	-4.17917	0.507943
279	-0.2009	-0.313069	-0.0887303	0.000447377	1	0	0.000447377	-3.51043	0.705246
411.8	0.212602	0.0934565	0.331748	0.000469818	1	0	0.000469818	3.4974	0.743555
458	0.13926	0.060789	0.21773	0.000504497	1	0	0.000504497	3.47836	0.484395
618.1	0.216407	0.0944349	0.338378	0.000506103	1	0	0.000506103	3.47751	0.752555
623	-0.195588	-0.307952	-0.0832236	0.000645612	1	0	0.000645612	-3.41169	0.667286
252.1	0.199989	0.0838736	0.316105	0.00073612	1	0	0.00073612	3.37576	0.675116
481	-0.156021	-0.246692	-0.065351	0.000744416	1	0	0.000744416	-3.37268	0.52621
252	0.193944	0.0802393	0.307648	0.000828364	1	0	0.000828364	3.34314	0.648381
574	-0.150204	-0.23872	-0.0616876	0.000881219	1	0	0.000881219	-3.32594	0.499568
380.1	-0.174092	-0.276814	-0.0713704	0.000894414	1	0	0.000894414	-3.32179	0.578299
496.1	0.177122	0.0725431	0.281701	0.000901497	1	0	0.000901497	3.31959	0.587973
613.5	-0.122756	-0.195443	-0.0500698	0.000932494	1	0	0.000932494	-3.31014	0.40634
454.11	0.202942	0.0811949	0.324688	0.00108633	1	0	0.00108633	3.26716	0.663042
781	0.126017	0.0500137	0.202021	0.00115502	1	0	0.00115502	3.24976	0.409527
771	0.0598762	0.00903164	0.110721	0.0209926	2	87.3259	0.0209926	2.30812	0.138201
766	-0.127017	-0.204931	-0.0491038	0.00139706	1	0	0.00139706	-3.19526	0.405854
686.1	-0.197879	-0.319877	-0.0758812	0.00147735	1	0	0.00147735	-3.1791	0.629077
771.1	0.0577046	0.00453101	0.110878	0.0334221	2	89.1045	0.0334221	2.12698	0.122736
375.1	0.108468	0.0410007	0.175936	0.00162652	1	0	0.00162652	3.15111	0.341796
282	-0.191771	-0.312572	-0.070971	0.0018613	1	0	0.0018613	-3.11151	0.596699
327.32	-0.104544	-0.158864	-0.0502233	0.000161884	2	0	0.000161884	-3.77209	0.394349
871	-0.135627	-0.222871	-0.0483819	0.00231196	1	0	0.00231196	-3.04692	0.413244
327.41	-0.184221	-0.30318	-0.0652622	0.00240313	1	0	0.00240313	-3.03528	0.559162
375	0.102646	0.0362958	0.168997	0.00242795	1	0	0.00242795	3.03218	0.311242
427.7	-0.118244	-0.186034	-0.0504536	0.000629237	2	0	0.000629237	-3.41869	0.404239
306.9	-0.188926	-0.311678	-0.0661738	0.0025562	1	0	0.0025562	-3.01661	0.569915
1015	-0.0919523	-0.152689	-0.0312158	0.00300377	1	0	0.00300377	-2.96735	0.272855
318	-0.0845626	-0.140605	-0.02852	0.00310204	1	0	0.00310204	-2.95744	0.250089
701.2	-0.182342	-0.303632	-0.061052	0.00321312	1	0	0.00321312	-2.94658	0.537285
686	-0.127866	-0.213232	-0.0424992	0.00332713	1	0	0.00332713	-2.93578	0.375385
579.8	0.150733	0.0494702	0.251995	0.00352817	1	0	0.00352817	2.91753	0.439767
801	-0.132142	-0.221525	-0.042759	0.00375999	1	0	0.00375999	-2.89763	0.382898
285.2	0.144834	0.0468149	0.242853	0.0037781	1	0	0.0037781	2.89612	0.419456
411.3	0.128891	0.041638	0.216145	0.00378762	1	0	0.00378762	2.89533	0.373183
729	0.0644485	0.00831105	0.120586	0.0244405	2	76.7096	0.0244405	2.25013	0.145018
261	0.0520774	0.00190676	0.102248	0.0419059	2	85.7032	0.0419059	2.03445	0.105949
550.2	0.108652	0.0349067	0.182398	0.00388017	1	0	0.00388017	2.88774	0.31376
585.4	0.157839	0.050137	0.265541	0.00407353	1	0	0.00407353	2.87241	0.453379
960	-0.134919	-0.228578	-0.0412605	0.00475084	1	0	0.00475084	-2.82346	0.38094
737	0.153362	0.0466155	0.260108	0.00486377	1	0	0.00486377	2.81592	0.431855
562.2	0.175443	0.053171	0.297715	0.00491853	1	0	0.00491853	2.81232	0.493403
705.8	-0.152792	-0.259857	-0.0457283	0.00515576	1	0	0.00515576	-2.79714	0.427381
425.1	0.165275	0.049322	0.281229	0.00521074	1	0	0.00521074	2.79371	0.461731
508	0.0290492	-0.0426485	0.100747	0.427135	2	94.4776	0.427135	0.794104	0.0230681
611.11	0.162479	0.0475447	0.277413	0.00559202	1	0	0.00559202	2.77079	0.450195
512.8	-0.0909442	-0.14087	-0.0410182	0.000356669	2	51.256	0.000356669	-3.57023	0.324692
760	-0.0906842	-0.142661	-0.0387071	0.000627269	2	17.2212	0.000627269	-3.41954	0.310098
291	-0.149812	-0.256405	-0.0432193	0.00587454	1	0	0.00587454	-2.7547	0.412689
574.1	-0.132695	-0.227177	-0.038213	0.0059103	1	0	0.0059103	-2.75272	0.365272
698	-0.100019	-0.159939	-0.0400983	0.00106956	2	0	0.00106956	-3.27156	0.327217
724.8	-0.14629	-0.251806	-0.0407732	0.00658021	1	0	0.00658021	-2.71737	0.397524
475.9	0.152752	0.0425095	0.262995	0.00661215	1	0	0.00661215	2.71577	0.414841
475	-0.103438	-0.160988	-0.0458889	0.000427004	2	38.8887	0.000427004	-3.52281	0.364393
346	0.153343	0.042211	0.264475	0.00684155	1	0	0.00684155	2.70446	0.414711
695	-0.0946963	-0.15914	-0.0302524	0.00397619	2	0	0.00397619	-2.88004	0.27273
386.2	0.13571	0.0367181	0.234702	0.00720961	1	0	0.00720961	2.687	0.364653
348.9	0.16409	0.0432553	0.284924	0.00777644	1	0	0.00777644	2.66163	0.436745
291.8	-0.172273	-0.300973	-0.0435721	0.00870149	1	0	0.00870149	-2.62356	0.451969
216.1	-0.0723027	-0.126466	-0.0181391	0.00888639	1	0	0.00888639	-2.61639	0.189172
371.3	0.110918	0.027144	0.194693	0.00945729	1	0	0.00945729	2.59507	0.28784
716	0.0521123	-0.00459782	0.108822	0.0716937	2	82.6501	0.0716937	1.80106	0.0938573
276.1	0.0485226	-0.00614527	0.10319	0.0819219	2	82.9559	0.0819219	1.73964	0.0844119
1013	0.134402	0.0291748	0.23963	0.0123	1	0	0.0123	2.50342	0.336465
478	-0.161015	-0.287193	-0.0348367	0.0123795	1	0	0.0123795	-2.50114	0.402721
627.3	0.0987413	0.0208449	0.176638	0.0129737	1	0	0.0129737	2.48449	0.245322
338.1	-0.091703	-0.149372	-0.0340338	0.00182919	2	0	0.00182919	-3.11665	0.285806
979	-0.10305	-0.184521	-0.0215792	0.0131698	1	0	0.0131698	-2.47914	0.255476
386.9	0.020233	-0.0309295	0.0713956	0.438282	2	95.1242	0.438282	0.775098	0.0156826
327.1	-0.113024	-0.202774	-0.0232743	0.0135766	1	0	0.0135766	-2.46828	0.278975
433.8	0.151094	0.030482	0.271706	0.0140749	1	0	0.0140749	2.45535	0.370988
593	-0.0910521	-0.163894	-0.0182099	0.0142863	1	0	0.0142863	-2.44998	0.223076
949	-0.0914115	-0.164569	-0.0182539	0.0143233	1	0	0.0143233	-2.44905	0.223871
737.3	0.157209	0.0304776	0.283941	0.0150423	1	0	0.0150423	2.43136	0.382232
1009	-0.0824328	-0.134012	-0.0308532	0.00173412	2	28.4345	0.00173412	-3.13235	0.258209
915	-0.1143	-0.20699	-0.0216093	0.0156515	1	0	0.0156515	-2.41694	0.276255
427	0.037253	-0.0129213	0.0874272	0.145609	2	87.5404	0.145609	1.45522	0.0542112
276.5	-0.0927523	-0.16829	-0.0172147	0.0160984	1	0	0.0160984	-2.40668	0.223225
735.1	-0.125487	-0.228268	-0.022706	0.0167114	1	0	0.0167114	-2.393	0.30029
270	0.130971	0.023239	0.238703	0.0171819	1	0	0.0171819	2.38279	0.312077
261.2	0.102209	0.017947	0.186471	0.0174324	1	0	0.0174324	2.37746	0.242998
454.1	0.119651	0.0205198	0.218783	0.0179955	1	0	0.0179955	2.36571	0.283061
536	-0.104108	-0.190464	-0.0177517	0.0181323	1	0	0.0181323	-2.3629	0.245997
599.4	0.0484789	-0.0112919	0.10825	0.111905	2	81.1763	0.111905	1.58969	0.0770663
289	-0.0776623	-0.142378	-0.0129469	0.0186669	1	0	0.0186669	-2.35212	0.182671
270.3	0.135604	0.0224084	0.248799	0.0188742	1	0	0.0188742	2.34801	0.318399
289.4	-0.0870211	-0.160586	-0.0134563	0.0204212	1	0	0.0204212	-2.31852	0.20176
379.9	-0.122394	-0.226309	-0.0184781	0.02097	1	0	0.02097	-2.30852	0.282548
535.9	-0.0960966	-0.177697	-0.0144964	0.0209882	1	0	0.0209882	-2.3082	0.22181
561	-0.101189	-0.152716	-0.0496609	0.000118641	2	90.7767	0.000118641	-3.84892	0.389467
261.4	0.0371127	-0.0137579	0.0879833	0.152747	2	84.3681	0.152747	1.42989	0.0530673
285.1	0.116575	0.0166939	0.216456	0.0221614	1	0	0.0221614	2.28759	0.266675
425	0.129955	0.0182521	0.241657	0.0225921	1	0	0.0225921	2.28026	0.296331
479	-0.0983159	-0.156335	-0.0402972	0.00089609	2	69.3164	0.00089609	-3.32127	0.326533
275.5	0.129803	0.0175462	0.24206	0.0234296	1	0	0.0234296	2.26636	0.29418
564.1	-0.113401	-0.213034	-0.013768	0.0256913	1	0	0.0256913	-2.23085	0.25298
459	0.0902757	0.0109356	0.169616	0.0257374	1	0	0.0257374	2.23015	0.201328
771.2	0.137303	0.0162034	0.258403	0.0262663	1	0	0.0262663	2.22225	0.305123
870	-0.115798	-0.218039	-0.0135581	0.0264245	1	0	0.0264245	-2.21992	0.257063
429.2	0.131237	0.0150393	0.247434	0.0268508	1	0	0.0268508	2.21368	0.290516
386	0.024456	-0.0267469	0.0756589	0.349203	2	92.094	0.349203	0.936136	0.0228942
110	-0.050155	-0.107125	0.00681469	0.0844349	2	57.0789	0.0844349	-1.72551	0.0865431
687.1	-0.0725967	-0.128168	-0.0170256	0.0104538	2	0	0.0104538	-2.56045	0.18588
276	0.0374986	-0.014109	0.0891062	0.154409	2	79.4875	0.154409	1.42413	0.0534028
241	0.0209968	-0.043232	0.0852256	0.521702	2	93.0405	0.521702	0.640725	0.0134532
741.4	0.0329004	-0.0257058	0.0915067	0.271207	2	87.8971	0.271207	1.10029	0.0361999
596	0.0971916	0.00811168	0.186271	0.0324779	1	0	0.0324779	2.13848	0.207842
535	-0.0879623	-0.147993	-0.0279319	0.00407977	2	27.0477	0.00407977	-2.87193	0.252621
724	-0.0857857	-0.165801	-0.00576993	0.0356115	1	0	0.0356115	-2.10134	0.180264
610.1	-0.062569	-0.134152	0.00901397	0.0866833	2	37.1419	0.0866833	-1.71316	0.107191
454	0.102923	0.00567543	0.20017	0.0380433	1	0	0.0380433	2.07439	0.213501
735.2	0.0911277	0.004985	0.17727	0.0381329	1	0	0.0381329	2.07342	0.188946
965	-0.118543	-0.23214	-0.00494663	0.0408204	1	0	0.0408204	-2.04535	0.242462
722.6	0.0121974	-0.0425492	0.066944	0.662346	2	94.0989	0.662346	0.436676	0.00532632
519.8	-0.112178	-0.220419	-0.00393694	0.0422257	1	0	0.0422257	-2.03129	0.227866
173	0.109501	0.00364227	0.215359	0.0426177	1	0	0.0426177	2.02744	0.222006
459.9	0.0879421	0.00289369	0.172991	0.0426944	1	0	0.0426944	2.02669	0.178231
512.7	0.0207639	-0.0292845	0.0708123	0.416136	2	90.8022	0.416136	0.813143	0.016884
457	0.0595386	0.000994553	0.118083	0.046229	1	0	0.046229	1.9933	0.118678
53	0.107457	0.00174923	0.213164	0.0463235	1	0	0.0463235	1.99243	0.2141
241.1	0.082329	0.00114107	0.163517	0.0468618	1	0	0.0468618	1.98755	0.163633
761	-0.0769494	-0.128244	-0.0256551	0.0032795	2	73.5075	0.0032795	-2.94025	0.22625
701	-0.0693076	-0.130042	-0.00857348	0.0253098	2	0	0.0253098	-2.23664	0.155016
293	-0.0758658	-0.152254	0.000522763	0.0515843	1	0	0.0515843	-1.94659	0.147679
726.1	-0.0741107	-0.12725	-0.0209715	0.0062671	2	51.6653	0.0062671	-2.73347	0.202579
251.1	-0.127615	-0.256651	0.00142071	0.052572	1	0	0.052572	-1.93842	0.247372
455	0.0314642	-0.0234102	0.0863387	0.261092	2	80.2577	0.261092	1.12381	0.03536
727.6	0.113678	-0.00150757	0.228863	0.0530705	1	0	0.0530705	1.93435	0.219892
110.1	-0.0438548	-0.101832	0.0141219	0.138192	2	50.3157	0.138192	-1.48256	0.0650173
735.21	0.0947203	-0.00185273	0.191293	0.0545557	1	0	0.0545557	1.9224	0.18209
396	0.0894496	-0.00184306	0.180742	0.0548035	1	0	0.0548035	1.92043	0.171782
286.2	0.0917435	-0.00236594	0.185853	0.0560399	1	0	0.0560399	1.91073	0.175297
426.7	0.0115005	-0.0486688	0.0716697	0.707945	2	91.7676	0.707945	0.374618	0.00430828
250.6	0.119681	-0.00493265	0.244295	0.0597795	1	0	0.0597795	1.88242	0.22529
244.4	0.0724274	-0.00299295	0.147848	0.0598061	1	0	0.0598061	1.88222	0.136324
388	0.126115	-0.00564676	0.257877	0.0606549	1	0	0.0606549	1.876	0.236592
741.3	0.0889225	-0.00418308	0.182028	0.0612148	1	0	0.0612148	1.87194	0.166458
293.1	-0.0766016	-0.157202	0.00399837	0.0624948	1	0	0.0624948	-1.86277	0.142691
8	-0.0839225	-0.172512	0.00466681	0.0633469	1	0	0.0633469	-1.85675	0.155823
536.8	-0.0889156	-0.183337	0.00550547	0.0649333	1	0	0.0649333	-1.84572	0.164113
240	-0.0988294	-0.205472	0.00781323	0.0693091	1	0	0.0693091	-1.8164	0.179514
599.2	0.106263	-0.00872603	0.221252	0.0701	1	0	0.0701	1.81126	0.19247
244	0.0670262	-0.00552773	0.13958	0.0701917	1	0	0.0701917	1.81067	0.121362
290	0.106374	-0.00943045	0.222178	0.0717994	1	0	0.0717994	1.80039	0.191514
276.12	0.0965222	-0.00859007	0.201634	0.0718885	1	0	0.0718885	1.79982	0.173723
377	0.109992	-0.0108935	0.230877	0.074525	1	0	0.074525	1.78338	0.196157
513.3	-0.10598	-0.222619	0.0106587	0.0749302	1	0	0.0749302	-1.78089	0.188739
690	-0.0875377	-0.184569	0.00949311	0.0770206	1	0	0.0770206	-1.76824	0.154788
287.3	0.101494	-0.0117317	0.214719	0.078932	1	0	0.078932	1.75692	0.178316
211	0.113329	-0.013166	0.239824	0.0790889	1	0	0.0790889	1.756	0.199006
912	-0.110402	-0.23399	0.0131864	0.0799673	1	0	0.0799673	-1.75088	0.1933
242	-0.090355	-0.191677	0.0109673	0.0804908	1	0	0.0804908	-1.74785	0.157927
286	0.0690877	-0.00878408	0.14696	0.0820509	1	0	0.0820509	1.73891	0.120137
530.14	-0.0795145	-0.169644	0.0106149	0.08378	1	0	0.08378	-1.72916	0.137493
371	0.0640389	-0.00863288	0.136711	0.0841378	1	0	0.0841378	1.72717	0.110606
714	-0.0809842	-0.173704	0.0117353	0.0869102	1	0	0.0869102	-1.71193	0.138639
324	-0.114546	-0.246005	0.0169123	0.0876653	1	0	0.0876653	-1.70784	0.195627
599.5	-0.0708746	-0.127033	-0.0147161	0.0133772	2	47.7083	0.0133772	-2.47357	0.175313
741	0.0190602	-0.0320305	0.0701509	0.46466	2	86.0385	0.46466	0.731195	0.0139367
251	-0.108949	-0.235173	0.0172763	0.0906961	1	0	0.0906961	-1.69174	0.184312
690.1	-0.0842823	-0.182242	0.0136776	0.091731	1	0	0.091731	-1.68634	0.142128
367.9	0.0957356	-0.0161794	0.207651	0.0936119	1	0	0.0936119	1.67665	0.160515
765	-0.0613764	-0.13363	0.0108773	0.0959255	1	0	0.0959255	-1.66494	0.102188
250.4	0.0469387	-0.00458383	0.0984612	0.0741655	2	0	0.0741655	1.78559	0.0838133
368.9	-0.105628	-0.230516	0.0192586	0.0973676	1	0	0.0973676	-1.65775	0.175106
610.4	0.0941403	-0.0174094	0.20569	0.0981061	1	0	0.0981061	1.65411	0.155718
550.4	-0.101487	-0.223339	0.0203651	0.10259	1	0	0.10259	-1.63243	0.16567
858	0.109544	-0.02223	0.241318	0.103238	1	0	0.103238	1.62935	0.178486
427.9	-0.0693094	-0.128025	-0.0105942	0.0206892	2	29.645	0.0206892	-2.31361	0.160355
496.21	0.0859105	-0.0176064	0.189427	0.103814	1	0	0.103814	1.62664	0.139745
250.42	0.046829	-0.0064769	0.100135	0.0851022	2	0	0.0851022	1.72182	0.0806311
271	0.0419054	-0.0165617	0.100372	0.160088	2	0	0.160088	1.40477	0.0588676
249	0.0961134	-0.0220408	0.214268	0.110852	1	0	0.110852	1.59438	0.153241
350.1	0.0609933	-0.0149842	0.136971	0.115614	1	0	0.115614	1.57345	0.09597
613.7	-0.0750243	-0.169146	0.0190975	0.118214	1	0	0.118214	-1.56231	0.117211
611	-0.0366119	-0.0870089	0.0137851	0.154488	2	0	0.154488	-1.42386	0.05213
611.1	0.0356356	-0.0151195	0.0863907	0.168788	2	0	0.168788	1.37611	0.0490385
726	-0.0538015	-0.103814	-0.0037895	0.03499	2	27.4615	0.03499	-2.10847	0.113439
687	-0.0522011	-0.102387	-0.00201515	0.0414836	2	3.35528	0.0414836	-2.03866	0.10642
709	-0.0931221	-0.215224	0.0289798	0.134964	1	0	0.134964	-1.49481	0.1392
271.3	0.0408701	-0.0178407	0.099581	0.172447	2	0	0.172447	1.36438	0.0557625
550.5	-0.0933652	-0.216209	0.0294783	0.136312	1	0	0.136312	-1.48967	0.139083
292	0.0509007	-0.0163477	0.118149	0.137932	1	0	0.137932	1.48353	0.075513
596.5	0.0747197	-0.0253207	0.17476	0.143217	1	0	0.143217	1.46392	0.109383
537	0.064166	-0.0217735	0.150105	0.143353	1	0	0.143353	1.46342	0.0939017
255	0.0959777	-0.0345719	0.226527	0.149597	1	0	0.149597	1.44096	0.1383
382	-0.0559818	-0.132527	0.0205639	0.15173	1	0	0.15173	-1.43345	0.080247
687.4	-0.0630375	-0.114302	-0.0117734	0.0159485	2	75.4032	0.0159485	-2.41009	0.151926
599	-0.0583518	-0.1082	-0.00850374	0.0217721	2	70.7972	0.0217721	-2.29432	0.133878
700	-0.0666368	-0.158599	0.0253252	0.155538	1	0	0.155538	-1.42024	0.0946403
41.8	-0.0873487	-0.208727	0.0340294	0.158393	1	0	0.158393	-1.4105	0.123205
287	0.0738271	-0.030271	0.177925	0.164515	1	0	0.164515	1.39005	0.102623
458.9	0.0636765	-0.0268179	0.154171	0.167847	1	0	0.167847	1.37916	0.0878199
798	-0.0625817	-0.112625	-0.0125385	0.0142445	2	82.0403	0.0142445	-2.45104	0.15339
526.4	-0.0793047	-0.193911	0.0353019	0.175014	1	0	0.175014	-1.35627	0.107558
470	-0.0851763	-0.209294	0.0389416	0.178607	1	0	0.178607	-1.34506	0.114567
599.8	-0.0659985	-0.16248	0.0304826	0.180001	1	0	0.180001	-1.34075	0.0884876
530.9	-0.065671	-0.162041	0.0306988	0.181668	1	0	0.181668	-1.33564	0.0877126
418	-0.0617903	-0.112685	-0.0108954	0.0173339	2	83.6323	0.0173339	-2.37955	0.147033
452.2	0.0739238	-0.0356919	0.18354	0.186233	1	0	0.186233	1.32181	0.0977129
715	0.0637699	-0.0315104	0.15905	0.189586	1	0	0.189586	1.3118	0.0836536
262	-0.0873425	-0.217897	0.0432121	0.189769	1	0	0.189769	-1.31126	0.114529
722.1	-0.0469698	-0.117277	0.0233377	0.190398	1	0	0.190398	-1.3094	0.0615023
275.3	0.063362	-0.0314942	0.158218	0.190453	1	0	0.190453	1.30924	0.0829561
513	-0.0631069	-0.158602	0.0323885	0.195237	1	0	0.195237	-1.29524	0.0817386
550	0.00926493	-0.0494355	0.0679653	0.757056	2	83.0192	0.757056	0.309349	0.0028661
519	-0.0524085	-0.134288	0.0294712	0.209649	1	0	0.209649	-1.25453	0.0657481
727.4	-0.0663599	-0.171943	0.0392236	0.217997	1	0	0.217997	-1.23187	0.081747
772.2	-0.0464218	-0.120639	0.0277953	0.220216	1	0	0.220216	-1.22595	0.0569109
772.3	0.0512422	-0.0319796	0.134464	0.227497	1	0	0.227497	1.20683	0.0618407
216	-0.0338755	-0.0889331	0.021182	0.227841	1	0	0.227841	-1.20594	0.0408518
745	0.0150926	-0.0463658	0.0765509	0.630292	2	83.2948	0.630292	0.481315	0.00726428
563	-0.0614845	-0.113314	-0.0096554	0.0200671	2	83.3795	0.0200671	-2.32509	0.142957
512.1	-0.0547218	-0.14443	0.0349867	0.231856	1	0	0.231856	-1.19559	0.0654248
613	-0.0458399	-0.0994796	0.00779983	0.0939415	2	0	0.0939415	-1.67496	0.0767801
592	-0.0507091	-0.135358	0.0339401	0.24034	1	0	0.24034	-1.17414	0.0595394
703	0.0448918	-0.0303225	0.120106	0.242069	1	0	0.242069	1.16983	0.0525158
292.1	0.0715146	-0.0484585	0.191488	0.242672	1	0	0.242672	1.16833	0.0835529
830	-0.0588797	-0.159439	0.0416798	0.251125	1	0	0.251125	-1.14762	0.0675715
1100	-0.0360331	-0.0977374	0.0256711	0.252387	1	0	0.252387	-1.14457	0.0412425
619.5	-0.0725501	-0.197987	0.0528871	0.256953	1	0	0.256953	-1.13362	0.0822444
798.1	-0.0709486	-0.194307	0.0524101	0.259626	1	0	0.259626	-1.12728	0.0799787
535.8	-0.0716404	-0.197078	0.0537972	0.262969	1	0	0.262969	-1.1194	0.0801944
741.2	-0.0505862	-0.139363	0.0381904	0.264064	1	0	0.264064	-1.11684	0.0564965
610	-0.0305862	-0.0931595	0.0319871	0.338041	2	0	0.338041	-0.958042	0.0293029
715.1	0.068553	-0.053076	0.190182	0.269288	1	0	0.269288	1.1047	0.0757307
70.3	0.0680923	-0.0545163	0.190701	0.276369	1	0	0.276369	1.08851	0.0741193
175	0.0345182	-0.0287628	0.0977991	0.28501	1	0	0.28501	1.06913	0.0369045
687.2	0.0409197	-0.0342076	0.116047	0.285721	1	0	0.285721	1.06756	0.0436841
1002	-0.0459932	-0.131429	0.0394427	0.291362	1	0	0.291362	-1.05514	0.0485291
694	-0.0393157	-0.112712	0.0340808	0.293765	1	0	0.293765	-1.0499	0.0412775
726.3	-0.0551283	-0.158805	0.0485484	0.297321	1	0	0.297321	-1.0422	0.0574545
722	-0.0054527	-0.05752	0.0466146	0.837372	2	89.8729	0.837372	-0.205256	0.0011192
244.1	0.0645934	-0.0582656	0.187452	0.302787	1	0	0.302787	1.03047	0.0665618
703.1	0.0558648	-0.0504914	0.162221	0.303239	1	0	0.303239	1.02951	0.0575135
681.5	-0.0564871	-0.164436	0.0514619	0.30507	1	0	0.30507	-1.02562	0.0579344
565	-0.0438769	-0.128882	0.0411287	0.31169	1	0	0.31169	-1.01168	0.0443895
763	-0.0133397	-0.070228	0.0435486	0.64581	2	92.5131	0.64581	-0.459591	0.00613081
573	0.0358001	-0.0337926	0.105393	0.313325	1	0	0.313325	1.00827	0.0360961
727.5	0.0621701	-0.0592209	0.183561	0.315471	1	0	0.315471	1.00381	0.0624068
281	-0.0623844	-0.185244	0.0604755	0.319626	1	0	0.319626	-0.995226	0.0620865
694.2	-0.037649	-0.11247	0.0371722	0.324013	1	0	0.324013	-0.986245	0.0371312
575	0.0476895	-0.0472798	0.142659	0.325004	1	0	0.325004	0.984227	0.0469373
577	0.0525359	-0.055743	0.160815	0.341618	1	0	0.341618	0.950973	0.0499602
565.1	0.0598614	-0.0653153	0.185038	0.348604	1	0	0.348604	0.937301	0.0561081
285	-0.0252355	-0.075794	0.0253231	0.327934	2	0	0.327934	-0.978285	0.0246875
561.2	-0.0369274	-0.115179	0.041324	0.354998	1	0	0.354998	-0.924938	0.0341555
960.2	-0.0520487	-0.162546	0.0584482	0.355881	1	0	0.355881	-0.923243	0.0480536
496.2	0.0419591	-0.049362	0.13328	0.367824	1	0	0.367824	0.900557	0.0377866
276.4	0.0437926	-0.0519281	0.139513	0.369875	1	0	0.369875	0.896708	0.0392692
367.4	-0.0305768	-0.0955674	0.0344138	0.356464	2	0	0.356464	-0.922124	0.0281956
756	0.0533376	-0.0661839	0.172859	0.381754	1	0	0.381754	0.874669	0.0466528
613.8	0.0358776	-0.0448046	0.11656	0.383444	1	0	0.383444	0.871568	0.0312697
800	-0.0514849	-0.16732	0.0643503	0.383669	1	0	0.383669	-0.871155	0.0448513
571	0.0324655	-0.0422275	0.107159	0.394259	1	0	0.394259	0.85192	0.027658
250.1	0.0470354	-0.061411	0.155482	0.395274	1	0	0.395274	0.850092	0.0399844
592.1	-0.0372226	-0.123549	0.0491037	0.398043	1	0	0.398043	-0.845122	0.0314576
967	-0.0516564	-0.171638	0.0683251	0.398752	1	0	0.398752	-0.843852	0.0435904
367	-0.0321241	-0.0868151	0.0225668	0.249636	2	0	0.249636	-1.15123	0.0369824
573.3	-0.0477002	-0.159641	0.0642405	0.403607	1	0	0.403607	-0.835196	0.039839
714.1	-0.0428848	-0.144766	0.0589965	0.40936	1	0	0.40936	-0.825021	0.0353809
578	0.0284483	-0.0391429	0.0960394	0.409406	1	0	0.409406	0.824939	0.0234681
526	-0.0396456	-0.134937	0.0556456	0.414814	1	0	0.414814	-0.815451	0.0323291
579	-0.0296729	-0.101423	0.0420775	0.417611	1	0	0.417611	-0.810572	0.024052
782	0.00919336	-0.0418773	0.0602641	0.724225	2	36.2118	0.724225	0.352818	0.00324358
695.7	-0.0449278	-0.154902	0.0650466	0.423295	1	0	0.423295	-0.800718	0.0359745
477	-0.0461251	-0.159765	0.0675152	0.426301	1	0	0.426301	-0.795538	0.0366943
512.9	-0.0530157	-0.103607	-0.00242466	0.0399855	2	87.8306	0.0399855	-2.0539	0.108889
564.9	-0.0372018	-0.130238	0.0558344	0.433197	1	0	0.433197	-0.783733	0.0291563
70	-0.0393122	-0.138132	0.0595073	0.435554	1	0	0.435554	-0.779724	0.0306526
269	0.0382707	-0.0621687	0.13871	0.45517	1	0	0.45517	0.746824	0.0285815
706.8	0.0330879	-0.0541611	0.120337	0.4573	1	0	0.4573	0.743301	0.0245943
578.8	0.0318613	-0.0525167	0.116239	0.459239	1	0	0.459239	0.740101	0.0235806
707	0.0389039	-0.0717744	0.149582	0.490856	1	0	0.490856	0.688949	0.0268028
564	0.0226503	-0.0418545	0.0871552	0.491303	1	0	0.491303	0.688237	0.0155888
38	-0.0333653	-0.134585	0.0678542	0.518227	1	0	0.518227	-0.64608	0.0215567
427.5	0.0297719	-0.0605593	0.120103	0.518286	1	0	0.518286	0.645989	0.0192324
594	-0.0311401	-0.126974	0.0646936	0.524203	1	0	0.524203	-0.636881	0.0198325
531	0.0333193	-0.0705082	0.137147	0.52936	1	0	0.52936	0.628983	0.0209573
8.5	0.0403395	-0.0859192	0.166598	0.531172	1	0	0.531172	0.626218	0.0252613
473.4	0.0300636	-0.0648062	0.124933	0.534527	1	0	0.534527	0.62111	0.0186728
420	0.037233	-0.0822935	0.15676	0.541499	1	0	0.541499	0.610548	0.0227326
571.5	0.023399	-0.0520474	0.0988453	0.54327	1	0	0.54327	0.607875	0.0142236
512	-0.0387233	-0.09409	0.0166434	0.17044	2	77.207	0.17044	-1.37079	0.0530816
742.9	0.023407	-0.0533931	0.100207	0.550264	1	0	0.550264	0.597365	0.0139825
370	-0.0391027	-0.171224	0.0930187	0.561859	1	0	0.561859	-0.580082	0.0226828
507	0.0291097	-0.0695917	0.127811	0.563226	1	0	0.563226	0.578057	0.0168271
110.11	0.0207535	-0.0499029	0.09141	0.564818	1	0	0.564818	0.5757	0.0119478
333	0.0370121	-0.0903531	0.164377	0.568968	1	0	0.568968	0.569573	0.0210811
356	-0.0274577	-0.122223	0.0673077	0.570105	1	0	0.570105	-0.567897	0.0155931
735.3	0.021839	-0.0537434	0.0974214	0.57117	1	0	0.57117	0.566329	0.0123681
509.1	0.029124	-0.0727614	0.131009	0.575297	1	0	0.575297	0.560267	0.0163172
288.2	-0.0261598	-0.120926	0.0686059	0.588471	1	0	0.588471	-0.541053	0.0141538
472	-0.0224056	-0.103867	0.0590561	0.589827	1	0	0.589827	-0.539087	0.0120786
214	-0.0270158	-0.126451	0.0724194	0.594367	1	0	0.594367	-0.532518	0.0143864
510	0.0226599	-0.0624239	0.107744	0.601673	1	0	0.601673	0.521996	0.0118284
727	-0.00518303	-0.057524	0.0471579	0.84611	2	66.2046	0.84611	-0.194084	0.00100594
367.8	0.0275204	-0.0810978	0.136139	0.61947	1	0	0.61947	0.496601	0.0136667
381.2	0.0310757	-0.0930633	0.155215	0.623676	1	0	0.623676	0.490647	0.0152472
519.9	0.0291295	-0.0873359	0.145595	0.623978	1	0	0.623978	0.490221	0.0142799
528	-0.024866	-0.124801	0.075069	0.625769	1	0	0.625769	-0.48769	0.0121269
418.1	0.0203997	-0.0625714	0.103371	0.62988	1	0	0.62988	0.481896	0.00983055
726.4	0.0242312	-0.0748357	0.123298	0.631651	1	0	0.631651	0.479404	0.0116165
695.8	-0.0275326	-0.140793	0.0857278	0.633747	1	0	0.633747	-0.476459	0.0131182
560	0.0247817	-0.0781998	0.127763	0.637171	1	0	0.637171	0.471658	0.0116885
288	-0.0176163	-0.091263	0.0560304	0.63919	1	0	0.63919	-0.468831	0.00825906
736	0.0290825	-0.0940382	0.152203	0.643382	1	0	0.643382	0.462975	0.0134645
214.1	-0.0310571	-0.162866	0.100752	0.644211	1	0	0.644211	-0.461819	0.0143428
401.3	0.0200497	-0.0652499	0.105349	0.645014	1	0	0.645014	0.460699	0.0092369
723	0.0293945	-0.0974156	0.156205	0.649594	1	0	0.649594	0.454327	0.0133547
480	0.0164916	-0.0555203	0.0885034	0.65353	1	0	0.65353	0.448863	0.00740246
473	0.0192052	-0.0652454	0.103656	0.655792	1	0	0.655792	0.445731	0.00856036
578.2	-0.0194854	-0.107614	0.0686436	0.664755	1	0	0.664755	-0.433357	0.00844412
327.7	0.0268068	-0.0958151	0.149429	0.6683	1	0	0.6683	0.428482	0.0114862
527	-0.0249985	-0.139626	0.0896287	0.669054	1	0	0.669054	-0.427447	0.0106855
348	0.0189252	-0.0715863	0.109437	0.681938	1	0	0.681938	0.40982	0.00775593
509	0.0143932	-0.057619	0.0864054	0.695244	1	0	0.695244	0.391749	0.00563853
594.1	-0.0205341	-0.124508	0.0834397	0.698692	1	0	0.698692	-0.387087	0.0079485
598	-0.0177887	-0.111126	0.075549	0.708743	1	0	0.708743	-0.373545	0.00664486
773	-0.0298669	-0.0833715	0.0236376	0.273921	2	71.327	0.273921	-1.09408	0.0326768
250.41	-0.0150057	-0.0985712	0.0685598	0.724873	1	0	0.724873	-0.351953	0.0052813
368	0.00458517	-0.0537983	0.0629686	0.877668	2	0	0.877668	0.153927	0.00070578
509.8	0.0132697	-0.0701628	0.0967023	0.755243	1	0	0.755243	0.311733	0.00413661
276.14	-0.0311462	-0.0914696	0.0291772	0.311552	2	55.2709	0.311552	-1.01197	0.031519
592.11	-0.0150002	-0.113345	0.0833442	0.764976	1	0	0.764976	-0.298952	0.00448433
338.2	-0.0166599	-0.0666745	0.0333548	0.513844	2	0	0.513844	-0.652863	0.0108766
250.3	0.0122661	-0.0723949	0.0969271	0.77643	1	0	0.77643	0.283974	0.00348326
276.41	0.014594	-0.0868933	0.116081	0.778058	1	0	0.778058	0.281851	0.00411334
199	-0.0122269	-0.10402	0.0795663	0.794036	1	0	0.794036	-0.261073	0.00319211
197	-0.016041	-0.137928	0.105846	0.796447	1	0	0.796447	-0.257948	0.00413775
689	-0.00874402	-0.0760902	0.0586022	0.799124	1	0	0.799124	-0.25448	0.00222518
994.2	-0.0142841	-0.12479	0.0962223	0.799998	1	0	0.799998	-0.25335	0.00361887
742	0.00873502	-0.0653259	0.0827959	0.817183	1	0	0.817183	0.23117	0.00201927
112.3	0.0149527	-0.113554	0.143459	0.819599	1	0	0.819599	0.228061	0.00341014
593.2	-0.0119399	-0.120064	0.0961846	0.828647	1	0	0.828647	-0.216437	0.00258422
727.1	-0.0194616	-0.0804199	0.0414967	0.531486	2	73.4013	0.531486	-0.625739	0.0121779
598.9	-0.0102795	-0.104323	0.0837645	0.830361	1	0	0.830361	-0.214239	0.00220227
569	-0.00909151	-0.0934741	0.0752911	0.832752	1	0	0.832752	-0.211173	0.00191988
535.2	0.00951223	-0.0853612	0.104386	0.844208	1	0	0.844208	0.196514	0.00186929
338	-0.00765069	-0.0581996	0.0428982	0.766738	2	41.0986	0.766738	-0.296645	0.00226954
756.5	0.012162	-0.115207	0.139531	0.851541	1	0	0.851541	0.187152	0.00227614
624.9	0.00920573	-0.0874057	0.105817	0.851848	1	0	0.851848	0.186761	0.00171927
530.1	-0.0246353	-0.0749824	0.0257117	0.337543	2	73.4573	0.337543	-0.959031	0.0236261
367.2	-0.0240381	-0.100843	0.0527666	0.539596	2	0	0.539596	-0.613424	0.0147456
530	-0.0194111	-0.0699426	0.0311205	0.451513	2	82.6104	0.451513	-0.752895	0.0146145
246	-0.00768147	-0.0948573	0.0794943	0.862883	1	0	0.862883	-0.172705	0.00132663
450	0.0103039	-0.108103	0.128711	0.864569	1	0	0.864569	0.170561	0.00175745
357	0.00645288	-0.0689962	0.081902	0.866873	1	0	0.866873	0.167631	0.00108171
292.4	0.0083276	-0.0968213	0.113477	0.876641	1	0	0.876641	0.155228	0.00129268
532	-0.0424951	-0.105877	0.0208864	0.188817	2	85.3797	0.188817	-1.31409	0.0558423
764	-0.0213019	-0.0772999	0.034696	0.455921	2	74.7564	0.455921	-0.745581	0.0158823
530.11	-0.0189633	-0.0691755	0.0312488	0.459173	2	79.4108	0.459173	-0.740209	0.0140368
788	0.00447351	-0.0668487	0.0757957	0.902158	1	0	0.902158	0.122936	0.000549955
260	0.00513506	-0.0900562	0.100326	0.915795	1	0	0.915795	0.105731	0.000542938
415.11	-0.00521535	-0.123402	0.112971	0.931076	1	0	0.931076	-0.086491	0.000451081
372	-0.00414818	-0.116842	0.108546	0.942485	1	0	0.942485	-0.0721463	0.000299276
539	-0.0283632	-0.0813885	0.0246622	0.294464	2	85.2436	0.294464	-1.04838	0.0297354
288.1	0.00374735	-0.102466	0.109961	0.944869	1	0	0.944869	0.0691514	0.000259134
599.9	0.00275047	-0.0826956	0.0881966	0.949694	1	0	0.949694	0.0630915	0.000173531
452	-0.00262496	-0.0895681	0.0843182	0.952812	1	0	0.952812	-0.0591757	0.000155334
851	-0.00333492	-0.131555	0.124885	0.959343	1	0	0.959343	-0.0509784	0.000170009
735	-0.0263384	-0.0841086	0.0314318	0.371547	2	80.6411	0.371547	-0.893579	0.0235354
706.2	-0.00175172	-0.0858593	0.0823559	0.967438	1	0	0.967438	-0.0408213	7.15077e-05
722.9	0.00238551	-0.112846	0.117617	0.967634	1	0	0.967634	0.0405755	9.67932e-05
415.1	0.0017576	-0.115992	0.119507	0.97666	1	0	0.97666	0.0292561	5.14204e-05
772	0.00087499	-0.0591131	0.0608631	0.977193	1	0	0.977193	0.0285887	2.50148e-05
994	-0.00102818	-0.107866	0.10581	0.984951	1	0	0.984951	-0.0188625	1.9394e-05

## Sheet: AMR_EWPS_results
Variable	Beta_aou_amr	SE_aou_amr
626	-0.845035	0.036351
626.1	-0.888531	0.0385889
627	-0.688785	0.0377423
627.2	-0.664011	0.037061
626.13	-0.819185	0.0513254
626.12	-0.804358	0.0528617
366	0.572048	0.03859
626.11	-0.90202	0.0631316
743	0.516092	0.0383635
366.2	0.516725	0.040605
743.11	0.547861	0.0432898
743.1	0.542477	0.0428942
628	-0.577219	0.0492935
272.1	0.441653	0.0398686
272	0.440798	0.0399249
614	-0.438133	0.0401396
733	0.42617	0.0390914
625	-0.434588	0.0406215
614.52	-0.454981	0.0429927
340	-0.44705	0.0433071
614.5	-0.422696	0.041053
792	-0.532659	0.0520983
401	0.39637	0.0392469
401.1	0.389468	0.0391539
740.1	0.377628	0.0382038
740.11	0.373357	0.0385524
740	0.364425	0.0377167
379.2	0.487192	0.0505538
218	-0.431283	0.0451829
362.2	0.634374	0.0667063
218.1	-0.422896	0.0454248
619	-0.3459	0.0393167
743.9	0.389788	0.0450992
250	0.308716	0.0382956
272.13	0.353918	0.0457507
362	0.402197	0.0522244
365	0.384873	0.0502715
272.11	0.303929	0.0402151
401.2	0.43881	0.058413
562.1	0.332556	0.0448887
79	-0.324509	0.0443301
562	0.319257	0.043923
208	0.294863	0.040658
841	-0.414565	0.057404
619.4	-0.336214	0.0468353
389.1	0.395211	0.0551559
300	-0.262741	0.0379701
374	0.367682	0.0531878
379	0.287709	0.0426319
411.4	0.363302	0.0539315
278.4	-0.453951	0.0692194
339	-0.249118	0.038106
300.1	-0.246361	0.0381247
433	0.318691	0.0495903
792.1	-0.4346	0.0677704
389	0.27463	0.0435536
306	-0.318761	0.0515432
250.2	0.238633	0.0386772
375.1	0.262609	0.0433395
304	-0.277567	0.04593
250.7	0.405475	0.0675559
375	0.253406	0.0428786
465.2	-0.249608	0.0425332
740.9	0.230035	0.0393779
585	0.291995	0.0500121
428	0.392716	0.0681628
585.3	0.32306	0.0566325
613.5	-0.256076	0.0453096
433.3	0.374326	0.0666574
720.1	0.343195	0.0612609
250.23	0.351694	0.063034
381.1	-0.31667	0.0567973
250.22	0.365249	0.0660131
381	-0.290194	0.0524644
783	-0.251048	0.0460821
296	-0.206308	0.0381076
610.1	-0.264242	0.049544
457.3	0.320205	0.060057
279	-0.32509	0.0612004
381.11	-0.317948	0.0612154
112	-0.250531	0.0487024
617	-0.279202	0.0551668
622	-0.295219	0.0586017
443	0.336887	0.0675646
395	0.297037	0.0596468
702	0.245565	0.0494538
296.2	-0.186413	0.0381662
789	-0.189156	0.0397496
78	-0.288718	0.060687
1010	-0.192015	0.0409165
702.2	0.237137	0.0508247
300.12	-0.322484	0.0698251
585.1	0.302358	0.06601
296.22	-0.175662	0.0387328
521.1	-0.269483	0.0594305
704	-0.218246	0.0481839
947	-0.310678	0.0687742
785	-0.185855	0.0411518
610	-0.202899	0.0453612
523	-0.252064	0.0571541
371.3	0.21762	0.0495914
136	-0.287749	0.065907
244.4	0.194458	0.0449429
687.1	-0.176532	0.0409717
619.2	-0.291379	0.0677902
250.42	0.181445	0.0423189
521	-0.244266	0.0579528
496	0.260696	0.0621367
495	-0.175995	0.0419627
720	0.219309	0.0524919
350.2	0.266189	0.064109
411	0.188738	0.0458713
292.3	0.234355	0.0577294
740.2	0.254921	0.0631092
306.9	-0.270278	0.066993
563	-0.159223	0.0399515
465	-0.151947	0.0382538
350	0.18586	0.0475826
244	0.172524	0.0442976
278.1	-0.146626	0.0382404
716.9	0.191474	0.0500712
278	-0.148196	0.0388748
550.2	0.198466	0.0521487
386.2	0.244854	0.0644953
591	-0.147143	0.0387802
429	0.194013	0.0513357
380.4	0.219585	0.0586499
939	-0.151562	0.0406696
624	-0.172247	0.0462874
716	0.180869	0.0486676
250.24	0.215878	0.0582411
622.1	-0.260744	0.0704046
316	-0.2597	0.0704062
285	-0.147054	0.0400009
979	-0.210167	0.0577666
705	-0.244027	0.0671694
70	-0.241652	0.0666339
250.4	0.14448	0.0401206
613	-0.140748	0.0394108
798	-0.134548	0.038303
402	-0.202787	0.0577771
372	0.218928	0.0629447
728.7	-0.174472	0.0504117
300.11	-0.182802	0.0531047
728	-0.168663	0.0492886
300.4	-0.195017	0.0580272
475	-0.156458	0.0466535
338.1	-0.149209	0.0447275
317	-0.23114	0.0695038
464	-0.167249	0.0509834
573	-0.148984	0.0455282
456	0.207076	0.0636239
216.1	-0.123629	0.0382498
770	-0.130307	0.040699
793	0.158225	0.049767
590	-0.214355	0.0674848
627.3	0.166489	0.0525149
704.1	-0.178031	0.0567396
292	0.149812	0.0477752
495.2	-0.185343	0.0591221
949	-0.162234	0.0518337
278.11	-0.146581	0.0472574
514.2	0.210046	0.0679101
611.3	-0.128869	0.0416735
687.4	-0.125603	0.0407049
738	0.204122	0.0664202
536	-0.151037	0.0496048
772.2	-0.181465	0.0603805
599.3	-0.120155	0.0400161
627.1	-0.132387	0.0442568
721	0.123515	0.0414054
721.1	0.123346	0.0417117
371	0.134889	0.0462453
241	0.161619	0.055421
429.3	0.165249	0.0572042
535.9	-0.134125	0.0467451
1015	-0.133394	0.0465871
760	-0.111172	0.0389906
536.8	-0.145373	0.0510101
355.1	-0.198184	0.0696983
350.1	0.179772	0.0633225
703	0.146557	0.0521118
389.4	0.156189	0.0556304
514	0.131196	0.0468774
54	-0.178265	0.0637716
369	-0.141526	0.0513547
722.6	0.124872	0.0458707
686	-0.167186	0.0619561
586	0.151269	0.0561214
288	-0.145092	0.0538518
840	-0.112975	0.0421168
380.1	-0.178533	0.0667132
782.3	0.121106	0.0453948
550	0.120471	0.0456462
578.8	-0.156086	0.0595923
454.1	0.142131	0.0543433
241.2	0.177591	0.0680889
280.1	-0.125634	0.0482035
280	-0.121609	0.0466631
275	0.144598	0.0555748
618.1	0.180676	0.0698724
741.4	0.137319	0.0532163
276.1	0.122581	0.0480959
241.1	0.157508	0.0618644
483	-0.133368	0.0523909
781	0.151293	0.059955
110.11	0.1288	0.0513189
722	0.106275	0.0425476
578	-0.119288	0.04821
681	-0.111762	0.0456833
454	0.128836	0.053282
454.11	0.152041	0.0632414
618	0.14836	0.0617723
598.9	0.148264	0.0618736
369.5	-0.129665	0.054232
871	-0.151897	0.063686
289.4	-0.129664	0.0545434
735	0.124306	0.0525073
764	-0.10563	0.0447012
594	-0.132912	0.0573905
110.12	-0.159016	0.0686851
579.8	0.160733	0.0695829
509	0.152491	0.066739
741	0.0946421	0.0417258
687	-0.087325	0.0385996
355	-0.15048	0.0667408
327.4	-0.0953891	0.042744
571	-0.0967869	0.043855
271.3	0.1065	0.0484092
571.5	-0.0952742	0.0440148
706.8	0.128313	0.0595305
1011	0.0912509	0.0425799
261.2	0.132852	0.0634794
367.8	0.133975	0.0642734
173	0.130566	0.0627204
594.1	-0.128284	0.0616898
771	0.0859641	0.0413553
271	0.0990158	0.0481175
690	-0.144321	0.0705381
41	-0.0948441	0.046562
289	-0.0990841	0.0488398
427.9	-0.0885325	0.0438396
427.5	-0.130044	0.0645103
476	-0.0798932	0.0401289
351	-0.0852758	0.0429641
512.2	-0.111341	0.057563
288.2	-0.128473	0.0664957
706.2	0.109946	0.0571062
382	-0.0989838	0.0519486
426	0.0958455	0.0504048
599	-0.0733787	0.0386735
761	-0.0745714	0.039411
772	-0.0876946	0.0469831
458	0.116743	0.0628379
735.3	0.118604	0.0644019
840.3	-0.120026	0.065608
174.1	0.106416	0.0582804
286	-0.114219	0.0627331
598	0.108679	0.0604502
593.2	0.126982	0.0707125
427.3	0.1107	0.0618038
722.1	-0.103781	0.057961
624.9	-0.0941291	0.053311
724	-0.106725	0.0604516
8	-0.0969256	0.0565985
830	0.118591	0.0707183
763	0.0799673	0.0485055
41.8	-0.100755	0.0621156
457	0.0753114	0.0465762
714.1	0.109417	0.0681462
703.1	0.11199	0.0702432
793.2	0.0867864	0.0545773
199	-0.106248	0.0673125
596	0.100859	0.0641818
479	-0.0719582	0.0464851
510	0.108626	0.0704039
427.7	-0.090997	0.0599135
174.11	0.088329	0.0593846
1100	-0.0671936	0.0463043
535.2	0.0826887	0.0580543
481	-0.0918368	0.0653784
535	-0.0573928	0.0416595
246	0.0785126	0.0576622
175	-0.0587189	0.0432821
174	0.0755791	0.0557656
261	0.0521793	0.0386017
578.2	-0.0855336	0.0638481
835	-0.0892421	0.0674592
788	-0.0715692	0.0545861
216	-0.0504337	0.0388783
528	-0.0844052	0.0665239
726.1	-0.0536904	0.0429261
530.1	0.0475884	0.0386896
574	-0.0703387	0.0572821
599.9	0.0698656	0.0578232
512.9	-0.0497549	0.0412501
574.1	-0.0726131	0.0604718
293	-0.0656129	0.0546522
564.9	-0.0777717	0.0648999
380	0.0572422	0.049641
916	-0.0539489	0.0474036
558	-0.054632	0.049187
561.2	-0.0544373	0.0497696
579	-0.0549367	0.0502495
512	0.043575	0.0399582
611	-0.0415427	0.0383434
459.9	0.0733115	0.0696415
531	0.0711067	0.0693384
379.9	-0.0662935	0.064905
357	0.0619786	0.0607577
530.11	0.0392129	0.0385641
729	0.047739	0.0472375
727	0.0404826	0.0414562
261.4	0.0381661	0.0390968
539	-0.0397327	0.0412262
530.14	-0.0564504	0.0597517
519	-0.0589931	0.0624474
367.4	0.0462463	0.0495195
714	0.0569646	0.0610456
741.2	-0.0617055	0.0662741
367	0.0379403	0.0411298
530	0.0355055	0.0387871
512.7	0.0351721	0.0397538
327	-0.0336348	0.0384597
367.2	0.0523571	0.0602954
276	0.036207	0.0429722
765	-0.0491555	0.058474
727.1	0.0395431	0.048115
426.7	0.0449999	0.0550451
599.4	0.0358848	0.0444016
367.1	-0.0550554	0.0686038
537	0.0421405	0.0536858
348	0.0545189	0.0698021
782	-0.0322196	0.0428006
472	-0.0444068	0.0594042
480	-0.0392331	0.0525601
687.2	0.0425497	0.057142
418	-0.0276586	0.0383878
599.5	-0.03168	0.0440973
575	0.0419423	0.0624529
561	-0.0258318	0.0390197
250.41	0.0376329	0.0568459
1009	-0.0271502	0.0411884
396	0.0462377	0.0705909
701	-0.0294653	0.0458481
695	-0.0311404	0.0491548
532	-0.0316427	0.050392
276.14	-0.0376423	0.0602081
293.1	0.0373442	0.0599364
110	-0.026232	0.0431731
276.5	-0.0346695	0.0583151
1005	-0.0268341	0.0454287
318	-0.0280075	0.0475152
726.4	0.0379992	0.0666721
473	0.034719	0.0622472
338.2	0.0211668	0.0384163
327.32	0.0256537	0.046629
508	0.0375946	0.0687544
773	0.0203432	0.0392435
368	0.0221069	0.0440309
915	-0.0320585	0.0669383
790.6	0.0201713	0.0437408
726	-0.0177421	0.0388268
526	0.0281051	0.0628787
327.3	0.0197777	0.044334
593	-0.0201906	0.0467563
497	-0.0241469	0.0579961
525	-0.0240834	0.0628793
694	0.0170146	0.0464445
742	-0.02046	0.0562012
512.8	0.0135997	0.038376
592	-0.0174102	0.0500396
386.9	0.0133105	0.0387091
613.8	0.0180439	0.0532857
459	0.0206238	0.0621468
694.2	0.0152357	0.0472461
771.1	0.0137344	0.0454584
745	0.0129046	0.0437859
386	0.0107059	0.0385611
742.9	-0.0158422	0.057918
564.8	-0.0183775	0.0695034
277	-0.0124674	0.0542319
698	-0.00887822	0.0457092
564.1	-0.0121091	0.0630959
801	-0.0121034	0.0683235
613.7	-0.0121813	0.0702784
611.1	-0.00668443	0.039104
338	-0.00606483	0.0384123
530.9	-0.00885488	0.0613469
706	-0.00637245	0.0443356
455	0.00513552	0.0403553
790	0.00540033	0.0424557
411.3	0.00657572	0.0605822
592.1	0.00546084	0.0511405
592.11	0.0038958	0.0580777
427	0.00256784	0.0390787
766	-0.00389392	0.0669414
564	-0.00245207	0.0446512
561.1	-0.00203235	0.0421264
569	0.00179156	0.0569989
689	-0.000934584	0.0458807
565	-0.0010572	0.0564156
110.1	0.000373291	0.0438308

## Sheet: META_meta_EWPS_results
	Variable	Estimate	CI_lower	CI_upper	p_value	k_value	i2_value	p_value2	Z_value	SE_value	PHENO	DESCRIPTION	CATEGORY
0	626	-0.737978	-33.5599	32.0839	0.96485	2	0	0.96485	-0.0440684	0.0325215	626	Disorders of menstruation and other abnormal bleeding from female genital tract	genitourinary
1	626.1	-0.774304	-35.2419	33.6933	0.96488	2	0	0.96488	-0.04403	0.0340926	626.1	Irregular menstrual cycle/bleeding	genitourinary
2	627	-0.468417	-15.6413	14.7045	0.951751	2	0	0.951751	-0.0605079	0.0283429	627	Menopausal and postmenopausal disorders	genitourinary
3	627.2	-0.612713	-24.0913	22.8658	0.959207	2	0	0.959207	-0.0511486	0.0313394	627.2	Symptomatic menopause	genitourinary
4	626.13	-0.676411	-34.0932	32.7404	0.968354	2	0	0.968354	-0.0396729	0.0268352	626.13	Irregular menstrual cycle	genitourinary
5	626.12	-0.87181	-45.8185	44.0748	0.969675	2	0	0.969675	-0.0380165	0.0331432	626.12	Excessive or frequent menstruation	genitourinary
6	366	0.356211	-8.04508	8.75751	0.933771	2	0	0.933771	0.0831015	0.0296017	366	Cataract	sense organs
7	626.11	-0.949824	-49.9097	48.01	0.969669	2	0	0.969669	-0.0380234	0.0361156	626.11	Absent or infrequent menstruation	genitourinary
8	743	0.354552	-7.68657	8.39567	0.931133	2	0	0.931133	0.0864195	0.0306402	743	Osteoporosis osteopenia and pathological fracture	musculoskeletal
9	366.2	0.265826	-4.25154	4.7832	0.90818	2	0	0.90818	0.115335	0.030659	366.2	Senile cataract	sense organs
10	743.11	0.38676	-15.2613	16.0348	0.961363	2	0	0.961363	0.0484428	0.0187357	743.11	Osteoporosis NOS	musculoskeletal
11	743.1	0.386363	-15.2829	16.0556	0.961455	2	0	0.961455	0.0483275	0.0186719	743.1	Osteoporosis	musculoskeletal
12	628	-0.332315	-12.9299	12.2652	0.958766	2	0	0.958766	-0.0517026	0.0171816	628	Ovarian cyst	genitourinary
13	272.1	0.165715	-2.65764	2.98907	0.908414	2	0	0.908414	0.115039	0.0190637	272.1	Hyperlipidemia	endocrine/metabolic
14	272	0.299655	-5.42419	6.0235	0.918274	2	0	0.918274	0.102608	0.030747	272	Disorders of lipoid metabolism	endocrine/metabolic
15	614	-0.45448	-14.1203	13.2113	0.948029	2	0	0.948029	-0.0651821	0.029624	614	Inflammatory diseases of female pelvic organs	genitourinary
16	733	0.276876	-4.78985	5.3436	0.914706	2	0	0.914706	0.107104	0.0296546	733	Other disorders of bone and cartilage	musculoskeletal
17	625	-0.408337	-10.2547	9.43798	0.935218	2	0	0.935218	-0.0812819	0.0331904	625	Pain and other symptoms associated with female genital organs	genitourinary
18	614.52	-0.486774	-14.3003	13.3268	0.944936	2	0	0.944936	-0.069067	0.03362	614.52	Vaginitis and vulvovaginitis	genitourinary
19	340	-0.313306	-12.5256	11.899	0.959897	2	0	0.959897	-0.0502826	0.0157539	340	Migraine	neurological
20	614.5	-0.450464	-13.6826	12.7816	0.946802	2	0	0.946802	-0.0667235	0.0300565	614.5	Inflammatory disease of cervix vagina and vulva	genitourinary
21	792	-0.531093	-28.0676	27.0054	0.969846	2	0	0.969846	-0.0378016	0.0200762	792	Abnormal Papanicolaou smear of cervix and cervical HPV	genitourinary
22	401	0.259007	-3.60168	4.1197	0.895387	2	0	0.895387	0.131491	0.0340571	401	Hypertension	circulatory system
23	401.1	0.230106	-2.87736	3.33757	0.884605	2	0	0.884605	0.145134	0.0333961	401.1	Essential hypertension	circulatory system
24	740.1	0.228669	-3.32255	3.77989	0.899569	2	0	0.899569	0.126206	0.0288594	740.1	Osteoarthritis; localized	musculoskeletal
25	740.11	0.145856	-2.00608	2.29779	0.894316	2	0	0.894316	0.132845	0.0193762	740.11	Osteoarthrosis localized primary	musculoskeletal
26	740	0.243786	-3.66486	4.15244	0.902705	2	0	0.902705	0.122245	0.0298016	740	Osteoarthrosis	musculoskeletal
27	379.2	0.0811177	-0.61131	0.773545	0.818395	2	0	0.818395	0.229609	0.0186254	379.2	Disorders of vitreous body	sense organs
28	218	-0.350358	-8.49729	7.79658	0.932827	2	0	0.932827	-0.0842881	0.029531	218	Benign neoplasm of uterus	neoplasms
29	362.2	0.368679	-4.47704	5.21439	0.881458	2	0	0.881458	0.149121	0.0549777	362.2	Degeneration of macula and posterior pole of retina	sense organs
30	218.1	-0.348255	-8.38938	7.69287	0.932353	2	0	0.932353	-0.0848846	0.0295615	218.1	Uterine leiomyoma	neoplasms
31	619	-0.306064	-6.4562	5.84407	0.922299	2	0	0.922299	-0.0975385	0.0298531	619	Noninflammatory female genital disorders	genitourinary
32	743.9	0.209556	-5.47158	5.89069	0.942367	2	0	0.942367	0.0722957	0.01515	743.9	Osteopenia or other disorder of bone and cartilage	musculoskeletal
33	250	0.125114	-1.00008	1.25031	0.82748	2	0	0.82748	0.217934	0.0272667	250	Diabetes mellitus	endocrine/metabolic
34	272.13	0.156154	-1.31058	1.62289	0.83471	2	0	0.83471	0.208665	0.0325837	272.13	Mixed hyperlipidemia	endocrine/metabolic
35	362	0.177942	-1.39485	1.75074	0.824512	2	0	0.824512	0.221745	0.0394578	362	Other retinal disorders	sense organs
36	365	0.0470475	-0.26772	0.361815	0.76956	2	0	0.76956	0.29295	0.0137826	365	Glaucoma	sense organs
37	272.11	0.186882	-2.14784	2.5216	0.875336	2	0	0.875336	0.156884	0.0293188	272.11	Hypercholesterolemia	endocrine/metabolic
38	401.2	0.238174	-3.39498	3.87132	0.897764	2	0	0.897764	0.128487	0.0306022	401.2	Hypertensive heart and/or renal disease	circulatory system
39	562.1	0.185202	-2.45772	2.82812	0.890759	2	0	0.890759	0.137344	0.0254364	562.1	Diverticulosis	digestive
40	79	-0.242557	-3.61132	3.1262	0.887774	2	0	0.887774	-0.141121	0.03423	79	Viral infection	infectious diseases
41	562	0.1936	-2.62475	3.01195	0.8929	2	0	0.8929	0.134635	0.0260654	562	Diverticulosis and diverticulitis	digestive
42	208	0.0169401	-0.0217253	0.0556055	0.390507	2	0	0.390507	0.858699	0.0145464	208	Benign neoplasm of colon	neoplasms
43	841	-0.281622	-3.79232	3.22908	0.875068	2	0	0.875068	-0.157225	0.044278	841	Sprains and strains of back and neck	injuries & poisonings
44	619.4	-0.261663	-7.72768	7.20436	0.945235	2	0	0.945235	-0.0686911	0.0179739	619.4	Noninflammatory disorders of vagina	genitourinary
45	389.1	0.133642	-1.07808	1.34537	0.828859	2	0	0.828859	0.216166	0.0288887	389.1	Sensorineural hearing loss	sense organs
46	300	-0.299214	-15.7491	15.1507	0.969721	2	0	0.969721	-0.0379581	0.0113576	300	Anxiety disorders	mental disorders
47	374	0.0782185	-0.377854	0.534291	0.736763	2	0	0.736763	0.336143	0.0262926	374	Other disorders of eyelids	sense organs
48	379	-0.0307537	-0.203791	0.142284	0.727584	2	0	0.727584	-0.348341	0.0107128	379	Other disorders of eye	sense organs
49	411.4	0.252704	-3.65423	4.15963	0.899121	2	0	0.899121	0.126772	0.0320358	411.4	Coronary atherosclerosis	circulatory system
50	278.4	-0.373206	-19.6469	18.9005	0.969726	2	0	0.969726	-0.0379518	0.0141638	278.4	Abnormal weight gain	endocrine/metabolic
51	339	-0.18853	-2.76609	2.38903	0.886008	2	0	0.886008	-0.143357	0.0270272	339	Other headache syndromes	neurological
52	300.1	-0.266185	-13.9917	13.4593	0.969679	2	0	0.969679	-0.0380106	0.0101179	300.1	Anxiety disorder	mental disorders
53	433	0.194296	-2.19362	2.58221	0.873294	2	0	0.873294	0.159475	0.0309854	433	Cerebrovascular disease	circulatory system
54	792.1	-0.473015	-24.9235	23.9775	0.969754	2	0	0.969754	-0.0379172	0.0179354	792.1	Papanicolaou smear of cervix or vagina with atypical squamous cells	genitourinary
55	389	0.0243517	-0.0747356	0.123439	0.630033	2	0	0.630033	0.48168	0.0117297	389	Hearing loss	sense organs
56	306	-0.295239	-4.5108	3.92032	0.89082	2	0	0.89082	-0.137267	0.0405266	306	Other mental disorder	mental disorders
57	250.2	0.0318611	-0.071211	0.134933	0.544612	2	0	0.544612	0.605853	0.0193031	250.2	Type 2 diabetes	endocrine/metabolic
58	375.1	0.00283467	0.00201434	0.003655	1.26375e-11	2	0	1.26375e-11	6.77273	0.0191985	375.1	Dry eyes	sense organs
59	304	-0.226823	-3.02838	2.57474	0.873917	2	0	0.873917	-0.158685	0.0359933	304	Adjustment reaction	mental disorders
60	250.7	-0.0618873	-0.36578	0.242005	0.689787	2	0	0.689787	-0.399144	0.024702	250.7	Diabetic retinopathy	endocrine/metabolic
61	375	-0.00824012	-0.0174464	0.000966189	0.0793845	2	0	0.0793845	-1.75427	0.0144554	375	Disorders of lacrimal system	sense organs
62	465.2	-0.376777	-17.8306	17.077	0.966252	2	0	0.966252	-0.04231	0.0159414	465.2	Acute pharyngitis	respiratory
63	740.9	0.161234	-1.58593	1.9084	0.856469	2	0	0.856469	0.180871	0.0291626	740.9	Osteoarthrosis NOS	musculoskeletal
64	585	0.144132	-1.29562	1.58388	0.844446	2	0	0.844446	0.196209	0.02828	585	Renal failure	genitourinary
65	428	0.242985	-2.83903	3.325	0.877198	2	0	0.877198	0.154523	0.0375467	428	Congestive heart failure; nonhypertensive	circulatory system
66	585.3	3.66458e-05	3.64567e-05	3.68349e-05	0	2	0	5e-302	37.1465	0.00136126	585.3	Chronic renal failure [CKD]	genitourinary
67	613.5	-0.122992	-0.918869	0.672885	0.761977	2	0	0.761977	-0.302886	0.0372526	613.5	Mastodynia	genitourinary
68	433.3	0.104699	-0.906799	1.1162	0.839233	2	0	0.839233	0.202874	0.0212408	433.3	Cerebral ischemia	circulatory system
69	720.1	0.288274	-4.10813	4.68467	0.897741	2	0	0.897741	0.128516	0.0370478	720.1	Spinal stenosis of lumbar region	musculoskeletal
70	250.23	-0.0589071	-0.350082	0.232268	0.691724	2	0	0.691724	-0.396517	0.0233577	250.23	Type 2 diabetes with ophthalmic manifestations	endocrine/metabolic
71	381.1	-0.23636	-2.61967	2.14695	0.845882	2	0	0.845882	-0.194376	0.0459427	381.1	Otitis media	sense organs
72	250.22	0.208966	-1.55707	1.97501	0.816606	2	0	0.816606	0.231912	0.0484619	250.22	Type 2 diabetes with renal manifestations	endocrine/metabolic
73	381	-0.149941	-1.26771	0.967831	0.792616	2	0	0.792616	-0.262915	0.0394218	381	Otitis media and Eustachian tube disorders	sense organs
74	783	-0.142416	-1.18121	0.896381	0.788157	2	0	0.788157	-0.268705	0.0382678	783	Fever of unknown origin	symptoms
75	296	-0.263723	-13.9351	13.4077	0.969841	2	0	0.969841	-0.037808	0.00997084	296	Mood disorders	mental disorders
76	610.1	-0.0627923	-0.272726	0.147141	0.557716	2	0	0.557716	-0.586237	0.0368111	610.1	Cystic mastopathy	genitourinary
77	457.3	0.19259	-1.91448	2.29966	0.857824	2	0	0.857824	0.179144	0.0345015	457.3	Encounter for long-term (current) use of aspirin	circulatory system
78	279	-0.201048	-1.57824	1.17614	0.774783	2	0	0.774783	-0.286124	0.0575247	279	Disorders involving the immune mechanism	endocrine/metabolic
79	381.11	-0.248041	-2.5436	2.04752	0.832279	2	0	0.832279	-0.21178	0.0525301	381.11	Suppurative and unspecified otitis media	sense organs
80	112	-0.282958	-5.32302	4.7571	0.912381	2	0	0.912381	-0.110036	0.0311356	112	Candidiasis	infectious diseases
81	617	-0.260595	-3.42674	2.90555	0.871843	2	0	0.871843	-0.161318	0.0420388	617	Disorders secondary to childbirth surgery trauma	genitourinary
82	622	-0.258627	-3.02665	2.5094	0.854699	2	0	0.854699	-0.183127	0.0473615	622	Polyp of female genital organs	genitourinary
83	443	0.106445	-0.583876	0.796766	0.762484	2	0	0.762484	0.30222	0.0321699	443	Peripheral vascular disease	circulatory system
84	395	0.246514	-12.7008	13.1938	0.970232	2	0	0.970232	0.0373174	0.00919928	395	Heart valve disorders	circulatory system
85	702	0.0782729	-0.594231	0.750777	0.819552	2	0	0.819552	0.228121	0.0178557	702	Degenerative skin conditions and other dermatoses	dermatologic
86	296.2	-0.245391	-12.952	12.4612	0.969807	2	0	0.969807	-0.0378509	0.00928826	296.2	Depression	mental disorders
87	789	-0.189631	-2.49269	2.11343	0.871793	2	0	0.871793	-0.161381	0.0306029	789	Nausea and vomiting	symptoms
88	78	-0.284026	-3.27718	2.70913	0.852457	2	0	0.852457	-0.185985	0.0528245	78	Viral warts & HPV	infectious diseases
89	1010	-0.112567	-1.16751	0.942375	0.834342	2	0	0.834342	-0.209137	0.0235418	1010	Other tests
90	702.2	0.0517386	-0.343715	0.447192	0.797619	2	0	0.797619	0.256429	0.0132673	702.2	Seborrheic keratosis	dermatologic
91	300.12	-0.343708	-9.41027	8.72286	0.940771	2	0	0.940771	-0.0743011	0.0255379	300.12	Agorophobia social phobia and panic disorder	mental disorders
92	585.1	0.13475	-0.73293	1.00243	0.760838	2	0	0.760838	0.304381	0.0410153	585.1	Acute renal failure	genitourinary
93	296.22	-0.161593	-3.45141	3.12823	0.923305	2	0	0.923305	-0.0962718	0.0155569	296.22	Major depressive disorder	mental disorders
94	521.1	-0.265705	-2.81046	2.27905	0.837849	2	0	0.837849	-0.204645	0.0543752	521.1	Dental caries	digestive
95	704	-0.145291	-1.64015	1.34957	0.84892	2	0	0.84892	-0.190497	0.0276776	704	Diseases of hair and hair follicles	dermatologic
96	947	-0.233437	-2.10937	1.6425	0.807313	2	0	0.807313	-0.243893	0.0569338	947	Urticaria	dermatologic
97	785	-0.1948	-2.75127	2.36167	0.88128	2	0	0.88128	-0.149347	0.0290927	785	Abdominal pain	symptoms
98	610	-0.030598	-0.0880291	0.0268331	0.296381	2	0	0.296381	-1.04423	0.0319513	610	Benign mammary dysplasias	genitourinary
99	523	-0.213586	-1.64846	1.22128	0.770479	2	0	0.770479	-0.291748	0.0623132	523	Gingival and periodontal diseases	digestive
100	371.3	0.0197604	-0.387492	0.427013	0.924236	2	0	0.924236	0.0950997	0.00187921	371.3	Inflammation of eyelids	sense organs
101	136	-0.137721	-1.03672	0.761274	0.763982	2	0	0.763982	-0.300255	0.0413514	136	Other infectious and parasitic diseases	infectious diseases
102	244.4	0.0735538	-0.187618	0.334726	0.580959	2	0	0.580959	0.551984	0.0406005	244.4	Hypothyroidism NOS	endocrine/metabolic
103	687.1	-0.0732456	-0.436684	0.290193	0.692842	2	0	0.692842	-0.395001	0.0289321	687.1	Rash and other nonspecific skin eruption	dermatologic
104	619.2	0.036912	-0.146104	0.219928	0.692621	2	0	0.692621	0.3953	0.0145913	619.2	Disorders of uterus NEC	genitourinary
105	250.42	0.0478228	-0.0967366	0.192382	0.516732	2	0	0.516732	0.648391	0.0310079	250.42	Other abnormal glucose	endocrine/metabolic
106	521	-0.296123	-3.63349	3.04125	0.861939	2	0	0.861939	-0.173907	0.0514978	521	Diseases of hard tissues of teeth	digestive
107	496	0.123197	-0.666052	0.912446	0.759652	2	0	0.759652	0.305938	0.0376906	496	Chronic airway obstruction	respiratory
108	495	-0.171104	-1.99699	1.65479	0.854274	2	0	0.854274	-0.183668	0.0314262	495	Asthma	respiratory
109	720	0.0455539	-0.253491	0.344599	0.765273	2	0	0.765273	0.298564	0.0136007	720	Spinal stenosis	musculoskeletal
110	350.2	-0.0144563	-0.0450782	0.0161657	0.354822	2	0	0.354822	-0.925277	0.0133761	350.2	Abnormality of gait	neurological
111	411	0.185754	-1.91167	2.28318	0.862196	2	0	0.862196	0.17358	0.0322432	411	Ischemic Heart Disease	circulatory system
112	292.3	0.0336223	-0.0694432	0.136688	0.522572	2	0	0.522572	0.639385	0.0214976	292.3	Memory loss	mental disorders
113	740.2	0.194827	-2.08657	2.47622	0.867073	2	0	0.867073	0.167377	0.0326095	740.2	Osteoarthrosis generalized	musculoskeletal
114	306.9	-0.191471	-1.30114	0.918201	0.735223	2	0	0.735223	-0.338186	0.0647527	306.9	Tension headache	mental disorders
115	563	-0.0620338	-0.340366	0.216299	0.662235	2	0	0.662235	-0.43683	0.0270982	563	Constipation	digestive
116	465	-0.231499	-4.0312	3.56821	0.904949	2	0	0.904949	-0.119412	0.0276436	465	Acute upper respiratory infections of multiple or unspecified sites	respiratory
117	350	0.101565	-0.527751	0.730882	0.75176	2	0	0.75176	0.316319	0.0321271	350	Abnormal movement	neurological
118	244	0.0680668	-0.166078	0.302212	0.568835	2	0	0.568835	0.569768	0.0387823	244	Hypothyroidism	endocrine/metabolic
119	278.1	-0.124566	-1.19597	0.946841	0.819745	2	0	0.819745	-0.227873	0.0283851	278.1	Obesity	endocrine/metabolic
120	716.9	0.0855347	-0.335484	0.506554	0.690491	2	0	0.690491	0.398188	0.0340589	716.9	Arthropathy NOS	musculoskeletal
121	278	-0.132256	-1.30734	1.04283	0.825409	2	0	0.825409	-0.220593	0.0291747	278	Overweight obesity and other hyperalimentation	endocrine/metabolic
122	550.2	0.109871	-0.443076	0.662819	0.696945	2	0	0.696945	0.389448	0.0427892	550.2	Diaphragmatic hernia	digestive
123	386.2	-0.00398589	-0.00557101	-0.00240076	8.2887e-07	2	0	8.2887e-07	-4.92844	0.0196442	386.2	Peripheral or central vertigo	sense organs
124	591	-0.143594	-1.48508	1.19789	0.833827	2	0	0.833827	-0.209796	0.0301254	591	Urinary tract infection	genitourinary
125	429	0.0884565	-0.510771	0.687684	0.772333	2	0	0.772333	0.289325	0.0255927	429	Ill-defined descriptions and complications of heart disease	circulatory system
126	380.4	0.25174	-3.0499	3.55338	0.881205	2	0	0.881205	0.149442	0.0376205	380.4	Impacted cerumen	sense organs
127	939	-0.124235	-1.1619	0.913425	0.814473	2	0	0.814473	-0.234659	0.0291529	939	Atopic/contact dermatitis due to other or unspecified	dermatologic
128	624	-0.264136	-4.07313	3.54485	0.891889	2	0	0.891889	-0.135915	0.0359	624	Symptoms involving female genital tract	genitourinary
129	716	0.0537357	-0.125748	0.23322	0.557342	2	0	0.557342	0.586794	0.0315318	716	Other arthropathies	musculoskeletal
130	250.24	-0.0528103	-0.31425	0.208629	0.692172	2	0	0.692172	-0.395909	0.0209081	250.24	Type 2 diabetes with neurological manifestations	endocrine/metabolic
131	622.1	-0.264832	-2.90908	2.37942	0.844377	2	0	0.844377	-0.196298	0.0519861	622.1	Polyp of corpus uteri	genitourinary
132	316	-0.305659	-5.10876	4.49745	0.900739	2	0	0.900739	-0.124728	0.0381241	316	Substance addiction and disorders	mental disorders
133	285	-0.0244019	-0.0636001	0.0147964	0.222418	2	0	0.222418	-1.22012	0.0297733	285	Other anemias	hematopoietic
134	979	-0.09197	-0.455121	0.271181	0.619632	2	0	0.619632	-0.496372	0.0456513	979	Adverse drug events and drug allergies	injuries & poisonings
135	705	-0.205057	-2.08788	1.67777	0.83097	2	0	0.83097	-0.213458	0.043771	705	Disorders of sweat glands	dermatologic
136	70	-0.0395126	-0.0995431	0.0205179	0.197028	2	0	0.197028	-1.29006	0.0509738	70	Viral hepatitis	infectious diseases
137	250.4	0.0483368	-0.110566	0.207239	0.551038	2	0	0.551038	0.596205	0.0288186	250.4	Abnormal glucose	endocrine/metabolic
138	613	-0.0460013	-0.1964	0.104398	0.548855	2	0	0.548855	-0.599477	0.0275767	613	Other nonmalignant breast conditions	genitourinary
139	798	-0.0630748	-0.362859	0.236709	0.680063	2	0	0.680063	-0.412378	0.0260106	798	Malaise and fatigue	symptoms
140	402	-0.0365568	-0.173908	0.100794	0.60191	2	0	0.60191	-0.521656	0.0190701	402	Elevated blood pressure reading without diagnosis of hypertension	circulatory system
141	372	-0.00414829	-0.00473486	-0.00356172	1.09006e-43	2	0	1.09006e-43	-13.8611	0.0574998	372	Disorders of conjunctiva	sense organs
142	728.7	-0.218867	-2.46921	2.03148	0.84882	2	0	0.84882	-0.190625	0.0417216	728.7	Fasciitis	musculoskeletal
143	300.11	-0.312961	-4.76885	4.14293	0.89051	2	0	0.89051	-0.137659	0.0430819	300.11	Generalized anxiety disorder	mental disorders
144	728	-0.212462	-2.56673	2.1418	0.859604	2	0	0.859604	-0.176878	0.0375799	728	Disorders of muscle ligament and fascia	musculoskeletal
145	300.4	-0.304898	-4.2007	3.5909	0.878088	2	0	0.878088	-0.153393	0.0467694	300.4	Dysthymic disorder	mental disorders
146	475	-0.105114	-0.812158	0.601929	0.770759	2	0	0.770759	-0.291383	0.0306285	475	Chronic sinusitis	respiratory
147	338.1	-0.0944718	-0.629484	0.440541	0.729277	2	0	0.729277	-0.346088	0.0326955	338.1	Acute pain	neurological
148	317	-0.341245	-5.08241	4.39992	0.887816	2	0	0.887816	-0.141068	0.0481389	317	Alcohol-related disorders	mental disorders
149	464	-0.196654	-2.60159	2.20828	0.87267	2	0	0.87267	-0.160269	0.0315175	464	Acute sinusitis	respiratory
150	573	0.03449	-0.0358605	0.10484	0.336607	2	0	0.336607	0.960892	0.0331412	573	Other disorders of liver	digestive
151	456	0.0522307	-0.150264	0.254725	0.613175	2	0	0.613175	0.505546	0.0264051	456	Chronic venous insufficiency [CVI]	circulatory system
152	216.1	0.00828014	-0.00133094	0.0178912	0.0913059	2	0	0.0913059	1.68855	0.0139814	216.1	Screening for malignant neoplasms of the skin	neoplasms
153	770	-0.147727	-1.54415	1.2487	0.835741	2	0	0.835741	-0.207344	0.0306303	770	Myalgia and myositis unspecified	symptoms
154	793	0.0782419	-0.416928	0.573412	0.756794	2	0	0.756794	0.309694	0.0242311	793	Nonspecific abnormal findings on radiological and other examination of musculoskeletal system	symptoms
155	590	-0.227302	-1.58231	1.1277	0.742319	2	0	0.742319	-0.328784	0.0747331	590	Pyelonephritis	genitourinary
156	627.3	0.0513476	-0.154002	0.256698	0.624072	2	0	0.624072	0.490087	0.0251648	627.3	Postmenopausal atrophic vaginitis	genitourinary
157	704.1	-0.0778272	-0.451912	0.296258	0.683447	2	0	0.683447	-0.407764	0.0317352	704.1	Alopecia	dermatologic
158	292	0.0161309	-0.0105227	0.0427844	0.235551	2	0	0.235551	1.18618	0.0191341	292	Neurological disorders	mental disorders
159	495.2	-0.231583	-2.68343	2.22027	0.853133	2	0	0.853133	-0.185123	0.0428712	495.2	Asthma with exacerbation	respiratory
160	949	-0.0929851	-0.527854	0.341884	0.675154	2	0	0.675154	-0.419086	0.0389687	949	Allergies other	injuries & poisonings
161	278.11	-0.164107	-2.11534	1.78713	0.869069	2	0	0.869069	-0.164841	0.0270515	278.11	Morbid obesity	endocrine/metabolic
162	514.2	0.208298	-1.64992	2.06652	0.826102	2	0	0.826102	0.219703	0.0457638	514.2	Solitary pulmonary nodule	respiratory
163	611.3	-0.143891	-1.46486	1.17708	0.83094	2	0	0.83094	-0.213496	0.0307202	611.3	Lump or mass in breast	genitourinary
164	687.4	-0.063758	-0.360193	0.232676	0.67335	2	0	0.67335	-0.421555	0.0268775	687.4	Disturbance of skin sensation	dermatologic
165	738	0.181933	-1.44257	1.80644	0.826259	2	0	0.826259	0.219502	0.0399346	738	Other acquired musculoskeletal deformity	musculoskeletal
166	536	-0.104209	-0.586198	0.377781	0.671744	2	0	0.671744	-0.423755	0.044159	536	Disorders of function of stomach	digestive
167	772.2	-0.0464296	-0.157971	0.0651115	0.414588	2	0	0.414588	-0.815846	0.0378795	772.2	Spasm of muscle	symptoms
168	599.3	-0.149236	-1.45801	1.15954	0.823154	2	0	0.823154	-0.22349	0.0333528	599.3	Dysuria	genitourinary
169	627.1	0.0477958	-0.636486	0.732078	0.89111	2	0	0.89111	0.1369	0.00654323	627.1	Postmenopausal bleeding	genitourinary
170	721	0.079926	-0.33296	0.492812	0.704385	2	0	0.704385	0.379408	0.0303246	721	Spondylosis and allied disorders	musculoskeletal
171	721.1	0.0858521	-0.39069	0.562395	0.724014	2	0	0.724014	0.3531	0.0303144	721.1	Spondylosis without myelopathy	musculoskeletal
172	371	0.0617144	-0.153834	0.277262	0.574685	2	0	0.574685	0.561165	0.0346319	371	Inflammation of the eye	sense organs
173	429.3	0.0465541	-0.136085	0.229193	0.617365	2	0	0.617365	0.499588	0.0232579	429.3	Symptoms involving cardiovascular system	circulatory system
174	535.9	-0.0961792	-0.530824	0.338466	0.664503	2	0	0.664503	-0.433705	0.0417134	535.9	Gastritis and duodenitis NOS	digestive
175	1015	-0.0646088	-0.374436	0.245219	0.682749	2	0	0.682749	-0.408714	0.0264065	1015	Effects of other external causes
176	760	-0.0928973	-0.687641	0.501847	0.759498	2	0	0.759498	-0.306141	0.0284396	760	Back pain	symptoms
177	536.8	-0.0889641	-0.410576	0.232648	0.587706	2	0	0.587706	-0.542163	0.0482331	536.8	Dyspepsia and other specified disorders of function of stomach	digestive
178	355.1	-0.188243	-1.42768	1.05119	0.765951	2	0	0.765951	-0.297676	0.0560352	355.1	Chronic pain syndrome	neurological
179	350.1	0.0308934	-0.0381585	0.0999453	0.380553	2	0	0.380553	0.876877	0.0270897	350.1	Abnormal involuntary movements	neurological
180	703	0.0436369	-0.0588811	0.146155	0.404134	2	0	0.404134	0.834261	0.0364046	703	Diseases of nail NOS	dermatologic
181	389.4	-0.0517562	-0.445254	0.341741	0.796568	2	0	0.796568	-0.257791	0.0133423	389.4	Tinnitus	sense organs
182	514	0.0553302	-0.244093	0.354754	0.717218	2	0	0.717218	0.36218	0.0200395	514	Abnormal findings examination of lungs	respiratory
183	54	-0.298397	-4.04529	3.4485	0.875963	2	0	0.875963	-0.156089	0.0465765	54	Herpes simplex	infectious diseases
184	369	-0.204732	-2.35319	1.94372	0.851841	2	0	0.851841	-0.18677	0.038238	369	Infection of the eye	sense organs
185	722.6	0.0121398	0.00170547	0.0225741	0.0225889	2	0	0.0225889	2.28032	0.0276826	722.6	Degeneration of intervertebral disc	musculoskeletal
186	686	-0.129955	-0.854395	0.594484	0.725144	2	0	0.725144	-0.351593	0.0456914	686	Other local infections of skin and subcutaneous tissue	dermatologic
187	586	0.106315	-0.857458	1.07009	0.828827	2	0	0.828827	0.216206	0.0229859	586	Other disorders of the kidney and ureters	genitourinary
188	288	-0.0176781	-0.0338549	-0.00150131	0.0322047	2	0	0.0322047	-2.14186	0.0378641	288	Diseases of white blood cells	hematopoietic
189	840	-0.152106	-1.7293	1.42509	0.850077	2	0	0.850077	-0.18902	0.0287511	840	Sprains and strains	injuries & poisonings
190	380.1	-0.177161	-1.24903	0.894712	0.745979	2	0	0.745979	-0.323946	0.0573904	380.1	Otitis externa	sense organs
191	782.3	-0.019781	-0.0858505	0.0462885	0.557333	2	0	0.557333	-0.586807	0.0116076	782.3	Edema	symptoms
192	550	0.00927446	0.00365753	0.0148914	0.00121125	2	0	0.00121125	3.23622	0.0300142	550	Abdominal hernia	digestive
193	578.8	0.0317863	-0.0144223	0.0779949	0.177583	2	0	0.177583	1.34824	0.0428555	578.8	Hemorrhage of rectum and anus	digestive
194	454.1	0.0535855	-0.122564	0.229735	0.551022	2	0	0.551022	0.596229	0.0319492	454.1	Varicose veins of lower extremity	circulatory system
195	241.2	0.0269076	-0.039082	0.0928971	0.424183	2	0	0.424183	0.799185	0.0215041	241.2	Nontoxic multinodular goiter	endocrine/metabolic
196	280.1	-0.0821777	-0.464786	0.300431	0.67378	2	0	0.67378	-0.420966	0.034594	280.1	Iron deficiency anemias unspecified or not due to blood loss	hematopoietic
197	280	-0.0810168	-0.494156	0.332123	0.700719	2	0	0.700719	-0.38435	0.0311388	280	Iron deficiency anemias	hematopoietic
198	275	0.0404051	-0.080897	0.161707	0.513851	2	0	0.513851	0.652854	0.0263786	275	Disorders of mineral metabolism	endocrine/metabolic
199	618.1	0.107709	-0.451675	0.667093	0.705885	2	0	0.705885	0.377389	0.040648	618.1	Prolapse of vaginal walls	genitourinary
200	741.4	0.0307852	-0.0393806	0.100951	0.389826	2	0	0.389826	0.859933	0.0264732	741.4	Joint effusions	musculoskeletal
201	276.1	0.049813	-0.112919	0.212545	0.548538	2	0	0.548538	0.599952	0.0298854	276.1	Electrolyte imbalance	endocrine/metabolic
202	241.1	-0.0056166	-0.00880021	-0.00243298	0.000544589	2	0	0.000544589	-3.45781	0.0194211	241.1	Nontoxic uninodular goiter	endocrine/metabolic
203	483	-0.193815	-2.25394	1.86631	0.853705	2	0	0.853705	-0.184393	0.0357381	483	Acute bronchitis and bronchiolitis	respiratory
204	781	0.0484365	-0.162695	0.259568	0.652969	2	0	0.652969	0.449642	0.0217791	781	Symptoms involving nervous and musculoskeletal systems	symptoms
205	722	-0.00546284	-0.00765595	-0.00326972	1.0497e-06	2	0	1.0497e-06	-4.88209	0.02667	722	Intervertebral disc disorders	musculoskeletal
206	578	0.0284455	-0.0175508	0.0744418	0.225473	2	0	0.225473	1.2121	0.0344789	578	Gastrointestinal hemorrhage	digestive
207	681	-0.16996	-1.8695	1.52958	0.844608	2	0	0.844608	-0.196003	0.0333126	681	Superficial cellulitis and abscess	dermatologic
208	454	0.0618	-0.134762	0.258362	0.537747	2	0	0.537747	0.616223	0.0380826	454	Varicose veins	circulatory system
209	454.11	0.0353095	-0.0662675	0.136887	0.495676	2	0	0.495676	0.681309	0.0240567	454.11	Varicose veins of lower extremity symptomtic	circulatory system
210	618	0.0464721	-0.145716	0.238661	0.635551	2	0	0.635551	0.473928	0.0220244	618	Genital prolapse	genitourinary
211	598.9	-0.010292	-0.0146077	-0.00597628	2.95299e-06	2	0	2.95299e-06	-4.67406	0.0481054	598.9	Other nonspecific findings on examination of urine	genitourinary
212	369.5	-0.225366	-2.70373	2.253	0.858545	2	0	0.858545	-0.178226	0.0401662	369.5	Conjunctivitis infectious	sense organs
213	871	-0.135905	-0.878096	0.606286	0.719673	2	0	0.719673	-0.358896	0.0487759	871	Open wounds of extremities	injuries & poisonings
214	289.4	-0.0880046	-0.481102	0.305093	0.660816	2	0	0.660816	-0.438786	0.0386152	289.4	Lymphadenitis	hematopoietic
215	735	-0.0268743	-0.0725672	0.0188186	0.249012	2	0	0.249012	-1.15275	0.0309794	735	Acquired foot deformities	musculoskeletal
216	764	-0.0214427	-0.0525146	0.00962926	0.176194	2	0	0.176194	-1.35257	0.0290027	764	Sciatica	symptoms
217	594	-0.0311952	-0.0700572	0.00766671	0.115649	2	0	0.115649	-1.5733	0.0490795	594	Urinary calculus	genitourinary
218	110.12	-0.217748	-1.71483	1.27934	0.775588	2	0	0.775588	-0.285073	0.062074	110.12	Althete's foot	infectious diseases
219	579.8	-0.029204	-0.160147	0.101739	0.662018	2	0	0.662018	-0.437128	0.0127659	579.8	Nonspecific abnormal findings in stool contents	digestive
220	509	0.014447	0.00340182	0.0254923	0.0103589	2	0	0.0103589	2.56361	0.0370366	509	Respiratory failure insufficiency arrest	respiratory
221	741	0.0188893	-0.00839872	0.0461774	0.174868	2	0	0.174868	1.35673	0.0256277	741	Symptoms and disorders of the joints	musculoskeletal
222	687	-0.0525466	-0.260789	0.155696	0.620907	2	0	0.620907	-0.494565	0.0259877	687	Symptoms affecting skin	dermatologic
223	355	-0.200281	-1.69324	1.29268	0.792605	2	0	0.792605	-0.26293	0.0526599	355	Complex regional/central pain syndrome	neurological
224	327.4	-0.115742	-0.982626	0.751141	0.793564	2	0	0.793564	-0.261686	0.0302882	327.4	Insomnia	neurological
225	571	0.0322338	-0.0219343	0.0864018	0.243487	2	0	0.243487	1.16632	0.0375947	571	Chronic liver disease and cirrhosis	digestive
226	271.3	0.0426446	-0.0605653	0.145855	0.418041	2	0	0.418041	0.809824	0.0345346	271.3	Intestinal disaccharidase deficiencies and disaccharide malabsorption	endocrine/metabolic
227	571.5	0.0233773	-0.00449865	0.0512533	0.100246	2	0	0.100246	1.64366	0.0384244	571.5	Other chronic nonalcoholic liver disease	digestive
228	706.8	0.0214914	-0.00215361	0.0451364	0.0748392	2	0	0.0748392	1.78145	0.0382859	706.8	Other specified diseases of sebaceous glands	dermatologic
229	1011	0.047291	-0.238688	0.333269	0.745855	2	0	0.745855	0.32411	0.0153275	1011	Complications of surgical and medical procedures
230	261.2	-0.0246486	-0.14414	0.094843	0.685993	2	0	0.685993	-0.404299	0.00996541	261.2	Vitamin B-complex deficiencies	endocrine/metabolic
231	367.8	0.0274071	0.000632285	0.0541819	0.0448298	2	0	0.0448298	2.00625	0.0549855	367.8	Hypermetropia	sense organs
232	173	0.101667	-0.269142	0.472475	0.59101	2	0	0.59101	0.537373	0.0546329	173	Neoplasm of uncertain behavior of skin	neoplasms
233	594.1	-0.0205441	-0.0361221	-0.00496605	0.00974432	2	0	0.00974432	-2.58477	0.0531018	594.1	Calculus of kidney	genitourinary
234	771	-0.0162545	-0.116748	0.0842395	0.751231	2	0	0.751231	-0.317016	0.00515293	771	Musculoskeletal symptoms referable to limbs	symptoms
235	271	0.0435927	-0.0624175	0.149603	0.420265	2	0	0.420265	0.805961	0.035134	271	Disorders of carbohydrate transport and metabolism	endocrine/metabolic
236	690	-0.0878176	-0.359144	0.183509	0.525844	2	0	0.525844	-0.634362	0.0557082	690	Erythematosquamous dermatosis	dermatologic
237	41	-0.179105	-1.91078	1.55257	0.839357	2	0	0.839357	-0.202716	0.0363073	41	Bacterial infection NOS	infectious diseases
238	289	-0.0787947	-0.434546	0.276957	0.66421	2	0	0.66421	-0.434108	0.0342054	289	Other diseases of blood and blood-forming organs	hematopoietic
239	427.9	-0.0708864	-0.380192	0.238419	0.6533	2	0	0.6533	-0.449183	0.031841	427.9	Palpitations	circulatory system
240	476	-0.13484	-1.37412	1.10444	0.831129	2	0	0.831129	-0.213254	0.0287552	476	Allergic rhinitis	respiratory
241	351	-0.11919	-1.128	0.889618	0.816873	2	0	0.816873	-0.231568	0.0276006	351	Other peripheral nerve disorders	neurological
242	512.2	-0.145488	-1.17876	0.887783	0.782571	2	0	0.782571	-0.27597	0.0401505	512.2	Painful respiration	respiratory
243	706.2	-0.00175173	-0.00189188	-0.00161158	1.58668e-132	2	0	1.58668e-132	-24.4971	0.0429123	706.2	Sebaceous cyst	dermatologic
244	382	-0.0559959	-0.213272	0.10128	0.485291	2	0	0.485291	-0.697818	0.0390749	382	Otalgia	sense organs
245	426	0.0660583	-0.199583	0.331699	0.625979	2	0	0.625979	0.487394	0.0321964	426	Cardiac conduction disorders	circulatory system
246	599	-0.0594821	-0.314873	0.195909	0.64804	2	0	0.64804	-0.456487	0.0271528	599	Other symptoms/disorders or the urinary system	genitourinary
247	761	-0.0776853	-0.519942	0.364571	0.730635	2	0	0.730635	-0.34428	0.0267455	761	Cervicalgia	symptoms
248	772	0.00087499	0.000825962	0.000924018	4.71413e-268	2	0	4.71413e-268	34.9789	0.0306062	772	Symptoms of the muscles	symptoms
249	458	-0.0297087	-0.138107	0.0786897	0.591152	2	0	0.591152	-0.537167	0.0159586	458	Hypotension	circulatory system
250	735.3	0.0212767	-0.00287679	0.0454303	0.0842533	2	0	0.0842533	1.72652	0.0367348	735.3	Hallux valgus (Bunion)	musculoskeletal
251	840.3	-0.216192	-2.40681	1.97443	0.846623	2	0	0.846623	-0.193429	0.0418177	840.3	Joint/ligament sprain	injuries & poisonings
252	174.1	0.0880647	-0.575078	0.751208	0.794647	2	0	0.794647	0.260281	0.0229216	174.1	Breast cancer [female]	neoplasms
253	286	0.0711601	-0.152878	0.295198	0.533591	2	0	0.533591	0.622534	0.0442996	286	Coagulation defects	hematopoietic
254	598	-0.017809	-0.0308306	-0.00478734	0.00735043	2	0	0.00735043	-2.68054	0.0477376	598	Abnormal findings on examination of urine	genitourinary
255	593.2	-0.0118926	-0.0169557	-0.00682949	4.15043e-06	2	0	4.15043e-06	-4.6037	0.05475	593.2	Microscopic hematuria	genitourinary
256	427.3	-0.014121	-0.0407903	0.0125483	0.299377	2	0	0.299377	-1.03777	0.0146543	427.3	Other specified cardiac dysrhythmias	circulatory system
257	722.1	-0.0472681	-0.167654	0.0731179	0.441563	2	0	0.441563	-0.769556	0.0363755	722.1	Displacement of intervertebral disc	musculoskeletal
258	624.9	0.00920474	0.00583504	0.0125744	8.60865e-08	2	0	8.60865e-08	5.35388	0.0492811	624.9	stress incontinence female	genitourinary
259	724	-0.0858536	-0.43905	0.267343	0.633775	2	0	0.633775	-0.47642	0.0409023	724	Other and unspecified disorders of back	musculoskeletal
260	8	-0.0867386	-0.376912	0.203434	0.557961	2	0	0.557961	-0.585873	0.0508178	8	Intestinal infection	infectious diseases
261	830	-0.0592469	-0.191391	0.072897	0.379536	2	0	0.379536	-0.878752	0.0520633	830	Dislocation	injuries & poisonings
262	41.8	-0.079217	-0.22075	0.0623159	0.272639	2	0	0.272639	-1.09701	0.0869015	41.8	H. pylori	infectious diseases
263	457	0.0609701	-0.168336	0.290276	0.602273	2	0	0.602273	0.521135	0.0317737	457	Encounter for long-term (current) use of anticoagulants antithrombotics aspirin	circulatory system
264	714.1	-0.0430091	-0.112285	0.0262672	0.223675	2	0	0.223675	-1.21681	0.052334	714.1	Rheumatoid arthritis	musculoskeletal
265	703.1	0.0553544	-0.05725	0.167959	0.335304	2	0	0.335304	0.963484	0.0533331	703.1	Ingrowing nail	dermatologic
266	793.2	0.0369336	-0.100039	0.173906	0.59716	2	0	0.59716	0.528489	0.019519	793.2	Nonspecific abnormal findings on radiological and other examination of other intrathoracic organs (echocardiogram etc)	symptoms
267	199	-0.0122373	-0.0184931	-0.00598153	0.000126073	2	0	0.000126073	-3.83401	0.0469179	199	Neoplasm of uncertain behavior	neoplasms
268	596	0.060956	-0.30134	0.423252	0.74158	2	0	0.74158	0.329762	0.020101	596	Other disorders of bladder	genitourinary
269	479	-0.0985112	-0.737789	0.540766	0.762632	2	0	0.762632	-0.302026	0.0297529	479	Other upper respiratory disease	respiratory
270	427.7	-0.12057	-0.87837	0.637229	0.75516	2	0	0.75516	-0.311842	0.037599	427.7	Tachycardia NOS	circulatory system
271	174.11	0.0925294	-0.504229	0.689288	0.761205	2	0	0.761205	0.303899	0.0281196	174.11	Malignant neoplasm of female breast	neoplasms
272	1100	-0.0365444	-0.114992	0.0419032	0.361222	2	0	0.361222	-0.913039	0.0333665	1100	Family history
273	535.2	0.00950636	0.00584274	0.01317	3.66234e-07	2	0	3.66234e-07	5.08572	0.0483467	535.2	Atrophic gastritis	digestive
274	481	-0.159638	-1.17201	0.852732	0.757274	2	0	0.757274	-0.309062	0.0493381	481	Influenza	respiratory
275	535	-0.0880934	-0.582879	0.406692	0.72712	2	0	0.72712	-0.348959	0.030741	535	Gastritis and duodenitis	digestive
276	246	-0.00769135	-0.010291	-0.00509166	6.68359e-09	2	0	6.68359e-09	-5.79869	0.0445997	246	Other disorders of thyroid	endocrine/metabolic
277	175	0.0306046	-0.0398893	0.101098	0.39482	2	0	0.39482	0.850909	0.0260417	175	Acquired absence of breast	neoplasms
278	174	0.0983735	-0.597521	0.794268	0.78173	2	0	0.78173	0.277066	0.0272559	174	Breast cancer	neoplasms
279	261	0.0527093	-0.154077	0.259495	0.617363	2	0	0.617363	0.499591	0.0263331	261	Vitamin deficiency	endocrine/metabolic
280	578.2	-0.0194894	-0.0360393	-0.0029394	0.0209953	2	0	0.0209953	-2.30807	0.0449828	578.2	Blood in stool	digestive
281	835	-0.185067	-1.69267	1.32253	0.809868	2	0	0.809868	-0.240597	0.0445264	835	Internal derangement of knee	injuries & poisonings
282	788	0.00446899	0.00339117	0.00554682	4.41466e-16	2	0	4.41466e-16	8.12661	0.0363178	788	Syncope and collapse	symptoms
283	216	-0.0342503	-0.111118	0.0426173	0.382493	2	0	0.382493	-0.873311	0.0299111	216	Benign neoplasm of skin	neoplasms
284	528	-0.0248921	-0.0486568	-0.00112733	0.0400785	2	0	0.0400785	-2.05294	0.0511019	528	Diseases of the oral soft tissues excluding lesions specific for gingiva and tongue	digestive
285	726.1	-0.0751877	-0.469876	0.319501	0.708872	2	0	0.708872	-0.373371	0.0280729	726.1	Enthesopathy	musculoskeletal
286	530.1	-0.0249306	-0.0708561	0.020995	0.287346	2	0	0.287346	-1.06396	0.0265252	530.1	Esophagitis GERD and related diseases	digestive
287	574	-0.154015	-1.08317	0.775135	0.74527	2	0	0.74527	-0.324882	0.0500368	574	Cholelithiasis and cholecystitis	digestive
288	599.9	0.00275005	0.00240993	0.00309016	1.45962e-56	2	0	1.45962e-56	15.8476	0.0435817	599.9	Other abnormality of urination	genitourinary
289	512.9	-0.0528068	-0.238972	0.133358	0.578241	2	0	0.578241	-0.555956	0.0293583	512.9	Other dyspnea	respiratory
290	574.1	-0.136276	-0.82276	0.550208	0.697218	2	0	0.697218	-0.389078	0.053022	574.1	Cholelithiasis	digestive
291	293	-0.0767065	-0.364992	0.211579	0.602016	2	0	0.602016	-0.521504	0.0400028	293	Symptoms involving head and neck	mental disorders
292	380	0.0421736	-0.135371	0.219718	0.641526	2	0	0.641526	0.465567	0.0196346	380	Disorders of external ear	sense organs
293	916	-0.130605	-1.177	0.915794	0.806743	2	0	0.806743	-0.24463	0.0319498	916	Contusion	injuries & poisonings
294	558	-0.17197	-1.62041	1.27646	0.815992	2	0	0.815992	-0.232704	0.0400182	558	Noninfectious gastroenteritis	digestive
295	561.2	-0.037067	-0.10395	0.0298162	0.277381	2	0	0.277381	-1.08622	0.0402629	561.2	Flatulence	digestive
296	579	-0.0297695	-0.0768806	0.0173416	0.21553	2	0	0.21553	-1.2385	0.0368695	579	Other symptoms involving abdomen and pelvis	digestive
297	512	-0.0395901	-0.141694	0.0625142	0.447279	2	0	0.447279	-0.75996	0.0300869	512	Other symptoms of respiratory system	respiratory
298	611	-0.0366632	-0.13882	0.0654939	0.481799	2	0	0.481799	-0.703412	0.0257894	611	Abnormal findings on mammogram or breast exam	genitourinary
299	459.9	0.0908633	-0.228618	0.410345	0.577233	2	0	0.577233	0.557431	0.0506501	459.9	Circulatory disease NEC	circulatory system
300	379.9	-0.125443	-0.672272	0.421386	0.652986	2	0	0.652986	-0.449617	0.0564013	379.9	Pain swelling or discharge of eye	sense organs
301	357	0.00646206	0.00434234	0.00858178	2.30046e-09	2	0	2.30046e-09	5.97503	0.038611	357	Inflammatory and toxic neuropathy	neurological
302	729	-0.0201398	-0.115978	0.0756981	0.680431	2	0	0.680431	-0.411875	0.00829506	729	Other disorders of soft tissues	musculoskeletal
303	727	-0.0051831	-0.00715472	-0.00321149	2.57068e-07	2	0	2.57068e-07	-5.15248	0.0267058	727	Other disorders of synovium tendon and bursa	musculoskeletal
304	261.4	0.0372905	-0.0666232	0.141204	0.481835	2	0	0.481835	0.703354	0.0262285	261.4	Vitamin D deficiency	endocrine/metabolic
305	539	-0.0149923	-0.0359614	0.0059767	0.161117	2	0	0.161117	-1.40132	0.0210091	539	Bariatric surgery	digestive
306	530.14	-0.0797959	-0.343522	0.18393	0.553161	2	0	0.553161	-0.59303	0.0473213	530.14	Reflux esophagitis	digestive
307	519	-0.0531807	-0.181243	0.0748811	0.41569	2	0	0.41569	-0.813922	0.0432849	519	Other diseases of respiratory system not elsewhere classified	respiratory
308	367.4	-0.0305865	-0.0858477	0.0246747	0.278002	2	0	0.278002	-1.08482	0.0331808	367.4	Presbyopia	sense organs
309	714	-0.0827429	-0.345735	0.18025	0.537469	2	0	0.537469	-0.616645	0.051023	714	Rheumatoid arthritis and other inflammatory polyarthropathies	musculoskeletal
310	741.2	-0.0513596	-0.161175	0.058456	0.359324	2	0	0.359324	-0.916654	0.0470789	741.2	Stiffness of joint	musculoskeletal
311	367	-0.0321466	-0.104627	0.0403335	0.384689	2	0	0.384689	-0.869289	0.0279446	367	Disorders of refraction and accommodation; blindness and low vision	sense organs
312	530	-0.0108034	-0.0221583	0.000551396	0.0622112	2	0	0.0622112	-1.86479	0.0201461	530	Diseases of esophagus	digestive
313	512.7	0.0211832	-0.0115753	0.0539417	0.20501	2	0	0.20501	1.26741	0.0268477	512.7	Shortness of breath	respiratory
314	327	-0.119595	-1.11561	0.876424	0.813945	2	0	0.813945	-0.235339	0.0281455	327	Sleep disorders	neurological
315	367.2	-0.0240585	-0.0529559	0.00483895	0.102729	2	0	0.102729	-1.63176	0.0392577	367.2	Astigmatism	sense organs
316	276	0.0361666	-0.0476979	0.120031	0.39798	2	0	0.39798	0.845234	0.0305692	276	Disorders of fluid electrolyte and acid-base balance	endocrine/metabolic
317	765	-0.0622016	-0.261612	0.137209	0.540956	2	0	0.540956	-0.611367	0.038028	765	Cervical radiculitis	symptoms
318	727.1	-0.0194745	-0.0433415	0.00439246	0.109764	2	0	0.109764	-1.59925	0.0311447	727.1	Synovitis and tenosynovitis	musculoskeletal
319	599.4	0.0494582	-0.100054	0.198971	0.51676	2	0	0.51676	0.648348	0.0320661	599.4	Urinary incontinence	genitourinary
320	367.1	-0.167023	-1.54525	1.21121	0.812253	2	0	0.812253	-0.237521	0.0396713	367.1	Myopia	sense organs
321	537	0.054857	-0.122902	0.232616	0.545279	2	0	0.545279	0.60485	0.0331803	537	Other disorders of stomach and duodenum	digestive
322	348	0.0176148	0.00258457	0.0326451	0.021619	2	21.5855	0.021619	2.297	0.0404612	348	Other conditions of brain	neurological
323	782	0.009182	0.00282519	0.0155388	0.00463971	2	0	0.00463971	2.83104	0.0259946	782	Symptoms involving skin and other integumentary tissue	symptoms
324	472	-0.0224334	-0.0461035	0.00123661	0.0632304	2	0	0.0632304	-1.85757	0.0416717	472	Chronic pharyngitis and nasopharyngitis	respiratory
325	480	0.0164857	0.00197748	0.030994	0.02594	2	0	0.02594	2.22711	0.0367155	480	Pneumonia	respiratory
326	687.2	0.040162	-0.0452484	0.125572	0.356726	2	0	0.356726	0.921621	0.0370142	687.2	Localized superficial swelling mass or lump	dermatologic
327	418	-0.0632902	-0.34611	0.21953	0.660947	2	0	0.660947	-0.438606	0.0277595	418	Nonspecific chest pain	circulatory system
328	599.5	-0.071823	-0.390322	0.246676	0.658503	2	0	0.658503	-0.44198	0.0317443	599.5	Frequency of urination and polyuria	genitourinary
329	575	0.0467859	-0.0449855	0.138557	0.317694	2	0	0.317694	0.999207	0.0467488	575	Other biliary tract disease	digestive
330	561	-0.077724	-0.535386	0.379938	0.739242	2	0	0.739242	-0.332857	0.025871	561	Symptoms involving digestive system	digestive
331	250.41	-0.0143224	-0.0232165	-0.00542818	0.00159871	2	0	0.00159871	-3.15614	0.0452034	250.41	Impaired fasting glucose	endocrine/metabolic
332	1009	-0.0845624	-0.556887	0.387762	0.725662	2	0	0.725662	-0.350901	0.0296731	1009	Injury NOS
333	396	-0.010996	-0.172787	0.150795	0.894029	2	0	0.894029	-0.133207	0.00146474	396	Abnormal heart sounds	circulatory system
334	701	-0.0705218	-0.37007	0.229026	0.644491	2	0	0.644491	-0.461429	0.0325408	701	Other hypertrophic and atrophic conditions of skin	dermatologic
335	695	-0.096804	-0.602177	0.408569	0.707341	2	0	0.707341	-0.37543	0.0363432	695	Erythematous conditions	dermatologic
336	532	-0.0427981	-0.151864	0.0662678	0.441833	2	0	0.441833	-0.769102	0.0329161	532	Dysphagia	digestive
337	276.14	-0.0122465	-0.023871	-0.000621907	0.0389399	2	0	0.0389399	-2.06482	0.0252867	276.14	Hypopotassemia	endocrine/metabolic
338	293.1	-0.0780825	-0.354464	0.198299	0.579769	2	0	0.579769	-0.553722	0.043236	293.1	Swelling mass or lump in head and neck [Space-occupying lesion intracranial NOS]	mental disorders
339	110	-0.0512218	-0.219291	0.116847	0.550286	2	0	0.550286	-0.597331	0.0305963	110	Dermatophytosis / Dermatomycosis	infectious diseases
340	276.5	-0.0938668	-0.52151	0.333776	0.667044	2	0	0.667044	-0.430208	0.0403823	276.5	Hypovolemia	endocrine/metabolic
341	1005	-0.126795	-1.09813	0.844536	0.798068	2	0	0.798068	-0.255849	0.0324403	1005	Other symptoms
342	318	-0.0856202	-0.518494	0.347253	0.698259	2	0	0.698259	-0.387671	0.0331925	318	Tobacco use disorder	mental disorders
343	726.4	0.0242308	0.0014628	0.0469987	0.0369887	2	0	0.0369887	2.08589	0.0505427	726.4	Calcaneal spur; Exostosis NOS	musculoskeletal
344	338.2	-0.0167427	-0.0380389	0.0045534	0.123342	2	0	0.123342	-1.5409	0.0257988	338.2	Chronic pain	neurological
345	327.32	-0.0694885	-0.426715	0.287738	0.703012	2	0	0.703012	-0.381257	0.026493	327.32	Obstructive sleep apnea	neurological
346	508	0.0291199	-0.0160812	0.074321	0.206708	2	0	0.206708	1.26267	0.0367688	508	Pulmonary collapse; interstitial and compensatory emphysema	respiratory
347	773	-0.0299329	-0.0939582	0.0340924	0.359502	2	0	0.359502	-0.916315	0.0274279	773	Pain in limb	symptoms
348	368	0.00458451	0.00320121	0.0059678	8.26489e-11	2	0	8.26489e-11	6.4957	0.0297796	368	Visual disturbances	sense organs
349	915	-0.113035	-0.625297	0.399228	0.665391	2	0	0.665391	-0.432482	0.0488855	915	Superficial injury without mention of infection	injuries & poisonings
350	790.6	0.0221489	-0.482652	0.526949	0.931469	2	0	0.931469	0.0859966	0.00190473	790.6	Other abnormal blood chemistry	symptoms
351	726	-0.0540025	-0.276143	0.168138	0.63374	2	0	0.63374	-0.47647	0.0257306	726	Peripheral enthesopathies and allied syndromes	musculoskeletal
352	526	-0.0396482	-0.103012	0.0237152	0.220048	2	0	0.220048	-1.2264	0.0486246	526	Diseases of the jaws	digestive
353	327.3	-0.11416	-0.982036	0.753716	0.796552	2	0	0.796552	-0.257812	0.0294318	327.3	Sleep apnea	neurological
354	593	-0.0795255	-0.400381	0.24133	0.627118	2	0	0.627118	-0.485787	0.0386324	593	Hematuria	genitourinary
355	497	-0.165267	-1.48812	1.15759	0.806563	2	0	0.806563	-0.244862	0.0404676	497	Bronchitis	respiratory
356	525	-0.181026	-1.4064	1.04435	0.772163	2	0	0.772163	-0.289546	0.0524154	525	Other diseases of the teeth and supporting structures	digestive
357	694	-0.0331078	-0.0915116	0.025296	0.266542	2	0	0.266542	-1.11106	0.0367848	694	Dyschromia and Vitiligo	dermatologic
358	742	0.0087342	0.00477652	0.0126919	1.52231e-05	2	0	1.52231e-05	4.32544	0.0377792	742	Derangement of joint non-traumatic	musculoskeletal
359	512.8	-0.0933733	-0.692351	0.505604	0.759959	2	0	0.759959	-0.305534	0.0285288	512.8	Cough	respiratory
360	592	-0.0372463	-0.10732	0.0328275	0.297514	2	0	0.297514	-1.04178	0.0388024	592	Cystitis and urethritis	genitourinary
361	386.9	0.0198955	-0.010777	0.0505679	0.203616	2	0	0.203616	1.27132	0.0252934	386.9	Dizziness and giddiness (Light-headedness and vertigo)	sense organs
362	613.8	0.0356111	-0.025624	0.0968462	0.254365	2	0	0.254365	1.13981	0.0405899	613.8	Other specified disorders of breast	genitourinary
363	459	0.0899784	-0.245486	0.425443	0.599095	2	0	0.599095	0.525702	0.0473019	459	Other disorders of circulatory system	circulatory system
364	694.2	-0.0232434	-0.0603183	0.0138315	0.21916	2	0	0.21916	-1.22876	0.0285607	694.2	Other dyschromia	dermatologic
365	771.1	-0.0109044	-0.135821	0.114012	0.864152	2	0	0.864152	-0.171092	0.00186565	771.1	Swelling of limb	symptoms
366	745	0.0150897	0.000852086	0.0293273	0.0377773	2	0	0.0377773	2.07726	0.0313452	745	Pain in joint	musculoskeletal
367	386	0.0228323	-0.0215251	0.0671897	0.313042	2	0	0.313042	1.00886	0.0230346	386	Vertiginous syndromes and other disorders of vestibular system	sense organs
368	742.9	0.0233882	-0.00401554	0.0507919	0.0943735	2	0	0.0943735	1.67277	0.0391229	742.9	Other derangement of joint	musculoskeletal
369	564.8	-0.0425749	-0.288255	0.203105	0.73412	2	0	0.73412	-0.33965	0.0144606	564.8	Abnormal findings on exam of gastrointestinal tract/ abdominal area	digestive
370	277	-0.158157	-1.33176	1.01545	0.791682	2	0	0.791682	-0.264127	0.0417735	277	Other disorders of metabolism	endocrine/metabolic
371	698	-0.102524	-0.683116	0.478068	0.729267	2	0	0.729267	-0.3461	0.0354836	698	Pruritus and related conditions	dermatologic
372	564.1	-0.115261	-0.60175	0.371227	0.642386	2	0	0.642386	-0.464365	0.0535234	564.1	Irritable Bowel Syndrome	digestive
373	801	-0.135251	-0.861007	0.590504	0.714919	2	0	0.714919	-0.365257	0.0494015	801	Fracture of ankle and foot	injuries & poisonings
374	613.7	-0.0767696	-0.297817	0.144278	0.496065	2	0	0.496065	-0.680695	0.0522567	613.7	Other signs and symptoms in breast	genitourinary
375	611.1	0.0354528	-0.0606131	0.131519	0.469484	2	0	0.469484	0.723319	0.0256437	611.1	Abnormal mammogram	genitourinary
376	338	-0.00765415	-0.0121022	-0.00320608	0.000744442	2	0	0.000744442	-3.37267	0.0258149	338	Pain	neurological
377	530.9	-0.0661673	-0.237516	0.105181	0.449138	2	0	0.449138	-0.756853	0.0500789	530.9	Heartburn	digestive
378	706	-0.124928	-1.08035	0.830492	0.797735	2	0	0.797735	-0.256279	0.0320165	706	Diseases of sebaceous glands	dermatologic
379	455	0.0308023	-0.0382527	0.0998574	0.381981	2	0	0.381981	0.874252	0.026929	455	Hemorrhoids	circulatory system
380	790	0.00442398	-0.260559	0.269407	0.973896	2	0	0.973896	0.0327223	0.000144763	790	Nonspecific findings on examination of blood	symptoms
381	411.3	0.106148	-0.352735	0.565032	0.650278	2	0	0.650278	0.453376	0.0481252	411.3	Angina pectoris	circulatory system
382	592.1	-0.0377243	-0.0978925	0.0224439	0.219125	2	0	0.219125	-1.22886	0.0463578	592.1	Cystitis	genitourinary
383	592.11	-0.0147092	-0.0234734	-0.00594509	0.0010037	2	0	0.0010037	-3.28949	0.0483859	592.11	Acute cystitis	genitourinary
384	427	-0.0103028	-0.047094	0.0264884	0.583102	2	0	0.583102	-0.54886	0.00565481	427	Cardiac dysrhythmias	circulatory system
385	766	-0.129806	-0.890972	0.63136	0.738196	2	0	0.738196	-0.334244	0.0433868	766	Neuralgia neuritis and radiculitis NOS	symptoms
386	564	0.0225708	-0.00797241	0.0531141	0.147513	2	0	0.147513	1.44837	0.032691	564	Functional digestive disorders	digestive
387	561.1	-0.113028	-1.0462	0.820142	0.81235	2	0	0.81235	-0.237395	0.0268322	561.1	Diarrhea	digestive
388	569	-0.00909211	-0.012855	-0.00532922	2.18217e-06	2	0	2.18217e-06	-4.73578	0.0430582	569	Other disorders of intestine	digestive
389	689	-0.0087447	-0.013106	-0.00438344	8.49819e-05	2	0	8.49819e-05	-3.9299	0.0343658	689	Disorder of skin and subcutaneous tissue NOS	dermatologic
390	565	-0.0439623	-0.130926	0.0430011	0.321777	2	0	0.321777	-0.990813	0.0435584	565	Anal and rectal conditions	digestive
391	110.1	-0.0448561	-0.170979	0.0812663	0.485758	2	0	0.485758	-0.697072	0.0312679	110.1	Dermatophytosis	infectious diseases
392	626.2	-0.834884	-36.578	34.9083	0.963485	2	0	0.963485	-0.0457806	0.0382215	626.2	Dysmenorrhea	genitourinary
393	627.4	-0.961306	-50.548	48.6254	0.96969	2	0	0.96969	-0.0379966	0.0365263	627.4	Premenopausal menorrhagia	genitourinary
394	300.9	-0.629577	-33.0411	31.782	0.969631	2	0	0.969631	-0.0380712	0.0239688	300.9	Posttraumatic stress disorder	mental disorders
395	131	-0.633842	-46.782	45.5144	0.978523	1	0	0.978523	-0.0269205	0.0170633	131	Protozoan infection	infectious diseases
396	615	-0.675383	-35.5134	34.1626	0.96969	2	0	0.96969	-0.0379966	0.0256623	615	Endometriosis	genitourinary
397	180.3	-0.31213	-8.49768	7.87342	0.940424	2	0	0.940424	-0.074737	0.0233277	180.3	Cervical intraepithelial neoplasia [CIN] [Cervical dysplasia]	neoplasms
398	706.1	-0.476337	-25.0029	24.0502	0.969636	2	0	0.969636	-0.038065	0.0181318	706.1	Acne	dermatologic
399	782.6	-0.470809	-24.7616	23.8199	0.969697	2	0	0.969697	-0.0379885	0.0178853	782.6	Pallor and flushing	symptoms
400	395.2	0.308268	-6.37446	6.99099	0.92796	2	0	0.92796	0.0904114	0.027871	395.2	Nonrheumatic aortic valve disorders	circulatory system
401	585.33	0.391342	-19.7557	20.5384	0.969631	2	0	0.969631	0.0380708	0.0148987	585.33	Chronic Kidney Disease Stage III	genitourinary
402	440	0.417032	-21.0524	21.8865	0.969631	2	0	0.969631	0.0380713	0.0158769	440	Atherosclerosis	circulatory system
403	180	-0.489158	-25.8815	24.9031	0.969882	2	0	0.969882	-0.0377568	0.0184691	180	Cervical cancer and dysplasia	neoplasms
404	614.51	-0.2625	-5.44179	4.91679	0.920871	2	0	0.920871	-0.099336	0.0260757	614.51	Cervicitis and endocervicitis	genitourinary
405	296.1	-0.394423	-5.75696	4.96812	0.885375	2	0	0.885375	-0.144158	0.0568593	296.1	Bipolar	mental disorders
406	401.22	0.129864	-0.945592	1.20532	0.812912	2	0	0.812912	0.236671	0.0307352	401.22	Hypertensive chronic kidney disease	circulatory system
407	433.1	0.280689	-3.27032	3.83169	0.87688	2	0	0.87688	0.154925	0.0434859	433.1	Occlusion and stenosis of precerebral arteries	circulatory system
408	317.1	-0.393532	-6.21199	5.42493	0.89454	2	0	0.89454	-0.132562	0.0521674	317.1	Alcoholism	mental disorders
409	440.9	0.29733	-3.10479	3.69945	0.863994	2	0	0.863994	0.171292	0.0509301	440.9	Atherosclerosis of aorta	circulatory system
410	427.21	0.396141	-5.13118	5.92346	0.888289	2	0	0.888289	0.14047	0.0556459	427.21	Atrial fibrillation	circulatory system
411	428.4	0.334043	-4.32821	4.9963	0.888322	2	0	0.888322	0.140428	0.0469091	428.4	Heart failure with preserved EF [Diastolic heart failure]	circulatory system
412	612	-0.445979	-6.52639	5.63443	0.885692	2	0	0.885692	-0.143757	0.0641128	612	Breast conditions congenital or relating to hormones	genitourinary
413	427.2	0.377041	-4.7564	5.51048	0.885536	2	0	0.885536	0.143955	0.0542771	427.2	Atrial fibrillation and flutter	circulatory system
414	365.11	0.0809776	-0.422305	0.58426	0.752491	2	0	0.752491	0.315356	0.0255368	365.11	Primary open angle glaucoma	sense organs
415	394	0.0731488	-0.428357	0.574655	0.774972	2	0	0.774972	0.285877	0.0209116	394	Rheumatic disease of the heart valves	circulatory system
416	401.21	0.257742	-2.9392	3.45468	0.874445	2	0	0.874445	0.158015	0.0407272	401.21	Hypertensive heart disease	circulatory system
417	447	0.163844	-1.17834	1.50602	0.810905	2	0	0.810905	0.239258	0.0392009	447	Other disorders of arteries and arterioles	circulatory system
418	522	-0.319252	-3.3399	2.7014	0.835894	2	0	0.835894	-0.207148	0.0661323	522	Diseases of pulp and periapical tissues	digestive
419	586.2	0.265581	-2.22182	2.75298	0.83424	2	0	0.83424	0.209267	0.0555772	586.2	Cyst of kidney acquired	genitourinary
420	365.1	0.155553	-0.917663	1.22877	0.77635	2	0	0.77635	0.284079	0.0441893	365.1	Open-angle glaucoma	sense organs
421	274	0.253271	-1.93709	2.44363	0.820711	2	0	0.820711	0.22663	0.0573988	274	Gout and other crystal arthropathies	endocrine/metabolic
422	414	-0.00547767	-0.00873346	-0.00222188	0.00097542	2	0	0.00097542	-3.29752	0.0180627	414	Other forms of chronic heart disease	circulatory system
423	416	-0.0286269	-0.131554	0.0743002	0.58567	2	0	0.58567	-0.545121	0.0156051	416	Cardiomegaly	circulatory system
424	738.4	0.232297	-2.28202	2.74661	0.856305	2	0	0.856305	0.18108	0.0420643	738.4	Acquired spondylolisthesis	musculoskeletal
425	443.9	0.262065	-2.57112	3.09525	0.856137	2	0	0.856137	0.181293	0.0475106	443.9	Peripheral vascular disease unspecified	circulatory system
426	415.2	0.278067	-2.23424	2.79037	0.828261	2	0	0.828261	0.216933	0.0603219	415.2	Chronic pulmonary heart disease	circulatory system
427	585.31	-0.263648	-2.27307	1.74577	0.797056	2	0	0.797056	-0.257159	0.0677995	585.31	Renal dialysis	genitourinary
428	303	-0.336445	-3.87666	3.20377	0.852236	2	0	0.852236	-0.186266	0.0626683	303	Psychogenic and somatoform disorders	mental disorders
429	522.5	-0.318798	-3.21357	2.57597	0.829105	2	0	0.829105	-0.215849	0.0688123	522.5	Periapical abscess	digestive
430	930	-0.224404	-1.83011	1.3813	0.784151	2	0	0.784151	-0.273913	0.0614671	930	Allergic reaction to food	injuries & poisonings
431	274.1	-0.0549102	-0.333458	0.223638	0.699225	2	0	0.699225	-0.386367	0.0212155	274.1	Gout	endocrine/metabolic
432	395.3	0.322497	-2.42339	3.06838	0.817942	2	0	0.817942	0.230193	0.0742365	395.3	Nonrheumatic tricuspid valve disorders	circulatory system
433	619.1	-0.326068	-3.32921	2.67707	0.831479	2	0	0.831479	-0.212805	0.069389	619.1	Noninflammatory disorders of ovary fallopian tube and broad ligament	genitourinary
434	79.9	-0.107924	-0.680276	0.464428	0.711699	2	0	0.711699	-0.369576	0.0398861	79.9	Viremia NOS	infectious diseases
435	704.8	-0.295108	-3.29613	2.70592	0.847167	2	0	0.847167	-0.192734	0.0568774	704.8	Other specified diseases of hair and hair follicles	dermatologic
436	295	-0.258059	-2.00522	1.4891	0.772207	2	0	0.772207	-0.28949	0.0747053	295	Schizophrenia and other psychotic disorders	mental disorders
437	215	-0.187177	-1.65938	1.28503	0.803213	2	0	0.803213	-0.249191	0.0466427	215	Other benign neoplasm of connective and other soft tissue	neoplasms
438	280.2	-0.0666136	-0.322765	0.189538	0.610263	2	0	0.610263	-0.509699	0.0339528	280.2	Iron deficiency anemia secondary to blood loss (chronic)	hematopoietic
439	395.1	0.206249	-1.47463	1.88713	0.809948	2	0	0.809948	0.240493	0.0496015	395.1	Nonrheumatic mitral valve disorders	circulatory system
440	275.6	0.190819	-1.1661	1.54773	0.782837	2	0	0.782837	0.275624	0.0525942	275.6	Hypercalcemia	endocrine/metabolic
441	681.7	-0.195504	-1.58156	1.19055	0.782199	2	0	0.782199	-0.276454	0.0540477	681.7	Cellulitis and abscess of trunk	dermatologic
442	276.13	0.00346385	0.00241767	0.00451002	8.6192e-11	2	0	8.6192e-11	6.48938	0.0224782	276.13	Hyperpotassemia	endocrine/metabolic
443	433.21	0.0300153	-0.0520259	0.112056	0.473334	2	0	0.473334	0.717065	0.0215229	433.21	Cerebral artery occlusion with cerebral infarction	circulatory system
444	681.1	-0.230835	-2.0025	1.54083	0.798439	2	0	0.798439	-0.255368	0.0589479	681.1	Cellulitis and abscess of fingers/toes	dermatologic
445	433.2	0.0129528	-0.00517529	0.031081	0.161386	2	0	0.161386	1.40043	0.0181395	433.2	Occlusion of cerebral arteries	circulatory system
446	427.6	0.0858712	-0.422669	0.594412	0.740678	2	0	0.740678	0.330956	0.0284196	427.6	Premature beats	circulatory system
447	695.4	-0.298746	-2.37769	1.7802	0.778213	2	0	0.778213	-0.281648	0.0841414	695.4	Lupus (localized and systemic)	dermatologic
448	433.31	0.0941617	-0.4964	0.684723	0.754656	2	0	0.754656	0.312505	0.029426	433.31	Transient cerebral ischemia	circulatory system
449	285.21	0.291654	-1.72751	2.31082	0.777098	2	0	0.777098	0.283103	0.0825681	285.21	Anemia in chronic kidney disease	hematopoietic
450	427.1	0.217441	-1.32381	1.75869	0.782154	2	0	0.782154	0.276513	0.060125	427.1	Paroxysmal tachycardia unspecified	circulatory system
451	250.25	0.131824	-0.451061	0.714708	0.657577	2	0	0.657577	0.443261	0.0584324	250.25	Diabetes type 2 with peripheral circulatory disorders	endocrine/metabolic
452	345	-0.214525	-1.84077	1.41172	0.795985	2	0	0.795985	-0.258546	0.0554645	345	Epilepsy recurrent seizures convulsions	neurological
453	428.1	-0.00739161	-0.0132816	-0.00150165	0.013907	2	0	0.013907	-2.45966	0.0181808	428.1	Congestive heart failure (CHF) NOS	circulatory system
454	428.3	0.24058	-1.33806	1.81922	0.765174	2	0	0.765174	0.298693	0.0718598	428.3	Heart failure with reduced EF [Systolic or combined heart failure]	circulatory system
455	345.3	-0.201801	-1.59415	1.19055	0.776358	2	0	0.776358	-0.284069	0.0573253	345.3	Convulsions	neurological
456	362.3	0.00784931	0.00590362	0.00979501	2.63888e-15	2	0	2.63888e-15	7.9069	0.0620637	362.3	Other nondiabetic retinopathy	sense organs
457	411.2	0.187782	-1.01104	1.3866	0.758838	2	0	0.758838	0.307008	0.0576505	411.2	Myocardial infarction	circulatory system
458	578.9	0.00531511	-0.938376	0.949006	0.991192	2	0	0.991192	0.011039	5.86736e-05	578.9	Hemorrhage of gastrointestinal tract	digestive
459	110.13	-0.216539	-1.45492	1.02184	0.731815	2	0	0.731815	-0.342712	0.0742105	110.13	Dermatophytosis of the body	infectious diseases
460	263	-0.193712	-1.36094	0.973519	0.744974	2	0	0.744974	-0.325273	0.0630093	263	Other nutritional deficiency	endocrine/metabolic
461	842	-0.245721	-2.02991	1.53847	0.787215	2	0	0.787215	-0.269929	0.0663274	842	Other sprains and strains	injuries & poisonings
462	627.5	0.0350529	-0.0662305	0.136336	0.49757	2	0	0.49757	0.678318	0.023777	627.5	Premature menopause and other ovarian failure	genitourinary
463	346.1	0.0370789	-0.0320991	0.106257	0.293476	2	0	0.293476	1.05053	0.0389524	346.1	Nonspecific abnormal findings on radiological and other examination of skull and head	neurological
464	415	0.00287908	0.00180906	0.00394911	1.3377e-07	2	0	1.3377e-07	5.2736	0.0151831	415	Pulmonary heart disease	circulatory system
465	411.8	0.167104	-1.19706	1.53127	0.810263	2	0	0.810263	0.240087	0.0401196	411.8	Other chronic ischemic heart disease unspecified	circulatory system
466	623	0.0309732	-0.0467511	0.108697	0.434775	2	0	0.434775	0.781047	0.0241915	623	Hypertrophy of female genital organs	genitourinary
467	252.1	0.0560404	-0.170803	0.282884	0.628246	2	0	0.628246	0.484197	0.0271346	252.1	Hyperparathyroidism	endocrine/metabolic
468	252	0.108173	-0.377071	0.593417	0.662167	2	0	0.662167	0.436923	0.0472631	252	Disorders of parathyroid gland	endocrine/metabolic
469	496.1	0.100335	-0.906633	1.1073	0.845164	2	0	0.845164	0.195293	0.0195948	496.1	Emphysema	respiratory
470	686.1	-0.201048	-1.39241	0.990313	0.740831	2	0	0.740831	-0.330753	0.0664971	686.1	Carbuncle and furuncle	dermatologic
471	282	-0.0671947	-0.195542	0.061152	0.304835	2	0	0.304835	-1.02612	0.0689499	282	Hereditary hemolytic anemias	hematopoietic
472	327.41	0.0263486	-0.0188297	0.071527	0.253006	2	0	0.253006	1.14308	0.0301186	327.41	Organic or persistent insomnia	neurological
473	701.2	-0.113465	-0.709587	0.482657	0.709106	2	0	0.709106	-0.373057	0.0423288	701.2	Scar conditions and fibrosis of skin	dermatologic
474	285.2	0.142613	-0.510905	0.79613	0.668862	2	0	0.668862	0.42771	0.0609969	285.2	Anemia of chronic disease	hematopoietic
475	585.4	0.161586	-0.572765	0.895937	0.666273	2	0	0.666273	0.431269	0.0696871	585.4	Chronic kidney disease Stage I or II	genitourinary
476	960	-0.123176	-0.764979	0.518627	0.706797	2	0	0.706797	-0.376161	0.0463342	960	Poisoning by antibiotics	injuries & poisonings
477	737	0.156605	-0.656365	0.969575	0.705762	2	0	0.705762	0.377554	0.0591268	737	Curvature of spine	musculoskeletal
478	562.2	0.167338	-0.637849	0.972526	0.683766	2	0	0.683766	0.40733	0.0681619	562.2	Diverticulitis	digestive
479	705.8	-0.156335	-0.969256	0.656587	0.706229	2	0	0.706229	-0.376925	0.0589264	705.8	Hyperhidrosis	dermatologic
480	425.1	-0.0255448	-0.0747143	0.0236247	0.308559	2	0	0.308559	-1.01825	0.0260109	425.1	Primary/intrinsic cardiomyopathies	circulatory system
481	611.11	0.0245669	-0.608693	0.657827	0.939391	2	0	0.939391	0.0760355	0.00186796	611.11	Mammographic microcalcification	genitourinary
482	291	-0.150017	-0.958239	0.658205	0.71601	2	0	0.71601	-0.363796	0.0545756	291	Other specified nonpsychotic and/or transient mental disorders	mental disorders
483	724.8	-0.151181	-0.911488	0.609126	0.696741	2	0	0.696741	-0.389724	0.0589189	724.8	Other symptoms referable to back	musculoskeletal
484	475.9	0.0552218	-0.120478	0.230922	0.537889	2	0	0.537889	0.616009	0.0340171	475.9	Postnasal drip	respiratory
485	346	0.00933602	0.00427765	0.0143944	0.000297556	2	0	0.000297556	3.61742	0.0337723	346	Abnormal findings on study of brain and/or nervous system	neurological
486	348.9	0.020693	-0.00473701	0.0461231	0.110741	2	0	0.110741	1.59487	0.0330027	348.9	Other conditions of brain NOS	neurological
487	291.8	-0.175199	-1.04372	0.693324	0.692574	2	0	0.692574	-0.395365	0.0692673	291.8	Alteration of consciousness	mental disorders
488	1013	0.0557865	-0.112541	0.224113	0.515973	2	0	0.515973	0.649566	0.036237	1013	Asphyxia and hypoxemia
489	478	-0.165926	-0.89016	0.558308	0.653403	2	0	0.653403	-0.449039	0.0745074	478	Throat pain	respiratory
490	327.1	-0.115919	-0.654209	0.422372	0.672974	2	0	0.672974	-0.42207	0.0489258	327.1	Hypersomnia	neurological
491	433.8	0.0638915	-0.535885	0.663668	0.834615	2	0	0.834615	0.208786	0.0133397	433.8	Late effects of cerebrovascular disease	circulatory system
492	737.3	0.0611474	-0.186757	0.309052	0.628784	2	0	0.628784	0.483439	0.029561	737.3	Kyphoscoliosis and scoliosis	musculoskeletal
493	735.1	-0.128079	-0.629763	0.373605	0.616811	2	0	0.616811	-0.500375	0.0640875	735.1	Flat foot	musculoskeletal
494	270	0.0580067	-0.106703	0.222716	0.490036	2	0	0.490036	0.690251	0.0400392	270	Disorders of protein plasma/amino-acid transport and metabolism	endocrine/metabolic
495	270.3	0.0781137	-0.166697	0.322925	0.531721	2	0	0.531721	0.62538	0.0488508	270.3	Disorders of plasma protein metabolism	endocrine/metabolic
496	285.1	0.120954	-0.374501	0.616408	0.632309	2	0	0.632309	0.478479	0.0578738	285.1	Acute posthemorrhagic anemia	hematopoietic
497	425	0.102263	-0.233482	0.438008	0.550522	2	0	0.550522	0.596977	0.0610488	425	Cardiomyopathy	circulatory system
498	275.5	0.0122313	-0.387082	0.411545	0.952128	2	0	0.952128	0.0600351	0.000734305	275.5	Disorders of calcium/phosphorus metabolism	endocrine/metabolic
499	771.2	-0.0302268	-0.0853388	0.0248852	0.282391	2	0	0.282391	-1.07496	0.0324927	771.2	Cramp of limb	symptoms
500	870	-0.0546668	-0.221599	0.112265	0.520973	2	0	0.520973	-0.641847	0.0350877	870	Open wounds of head; neck; and trunk	injuries & poisonings
501	429.2	0.0543319	-0.105579	0.214243	0.50546	2	0	0.50546	0.665923	0.0361809	429.2	Abnormal function study of cardiovascular system	circulatory system
502	735.2	-0.0121674	-0.0307515	0.00641678	0.199414	2	0	0.199414	-1.28322	0.0156135	735.2	Acquired toe deformities	musculoskeletal
503	965	-0.118389	-0.580821	0.344043	0.615824	2	0	0.615824	-0.501778	0.059405	965	Poisoning by analgesics antipyretics and antirheumatics	injuries & poisonings
504	519.8	-0.112246	-0.550313	0.325821	0.615526	2	0	0.615526	-0.502201	0.05637	519.8	Other diseases of respiratory system NEC	respiratory
505	53	-0.025454	-0.1584	0.107493	0.707471	2	0	0.707471	-0.375255	0.00955173	53	Herpes zoster	infectious diseases
506	251.1	-0.130082	-0.61109	0.350926	0.596081	2	0	0.596081	-0.530045	0.0689493	251.1	Hypoglycemia	endocrine/metabolic
507	727.6	-0.0331496	-0.183321	0.117022	0.665267	2	0	0.665267	-0.432653	0.0143423	727.6	Rupture of tendon nontraumatic	musculoskeletal
508	735.21	0.0550143	-0.119072	0.2291	0.535663	2	0	0.535663	0.619384	0.034075	735.21	Hammer toe (acquired)	musculoskeletal
509	286.2	0.0917977	-0.251726	0.435321	0.600453	2	0	0.600453	0.523749	0.0480789	286.2	Encounter for long-term (current) use of anticoagulants	hematopoietic
510	250.6	0.0887257	-0.32831	0.505762	0.676687	2	0	0.676687	0.416988	0.0369976	250.6	Polyneuropathy in diabetes	endocrine/metabolic
511	388	0.111355	-0.341001	0.563711	0.629466	2	0	0.629466	0.482479	0.0537265	388	Other disorders of ear	sense organs
512	741.3	0.00711661	0.00321192	0.0110213	0.000354012	2	0	0.000354012	3.57219	0.0254219	741.3	Difficulty in walking	musculoskeletal
513	240	-0.100849	-0.447023	0.245324	0.568008	2	0	0.568008	-0.570988	0.0575838	240	Simple and unspecified goiter	endocrine/metabolic
514	599.2	-0.018834	-0.100667	0.0629989	0.651924	2	0	0.651924	-0.45109	0.00849585	599.2	Retention of urine	genitourinary
515	290	-0.0203416	-0.0707314	0.0300483	0.428824	2	0	0.428824	-0.791205	0.0160943	290	Delirium dementia and amnestic and other cognitive disorders	mental disorders
516	276.12	0.00753575	-0.000396694	0.0154682	0.0626104	2	0	0.0626104	1.86195	0.0140312	276.12	Hyposmolality and/or hyponatremia	endocrine/metabolic
517	377	0.0267107	-0.26703	0.320451	0.858546	2	0	0.858546	0.178225	0.00476052	377	Disorders of optic nerve and visual pathways	sense organs
518	513.3	-0.110754	-0.469681	0.248174	0.545324	2	0	0.545324	-0.604782	0.0669818	513.3	Hypoventilation	respiratory
519	287.3	-0.00526362	-0.00681364	-0.0037136	2.81899e-11	2	0	2.81899e-11	-6.65573	0.0350333	287.3	Thrombocytopenia	hematopoietic
520	211	-0.0239433	-0.182077	0.134191	0.766649	2	0	0.766649	-0.296761	0.00710543	211	Benign neoplasm of other parts of digestive system	neoplasms
521	912	-0.110463	-0.489233	0.268306	0.567595	2	0	0.567595	-0.571597	0.0631404	912	Insect bite	injuries & poisonings
522	242	-0.083603	-0.342502	0.175296	0.526794	2	0	0.526794	-0.632907	0.052913	242	Thyrotoxicosis with or without goiter	endocrine/metabolic
523	324	-0.118623	-0.486414	0.249168	0.527293	2	0	0.527293	-0.632144	0.0749869	324	Other CNS infection and poliomyelitis	neurological
524	251	-0.110466	-0.470137	0.249205	0.547198	2	0	0.547198	-0.601965	0.0664966	251	Other disorders of pancreatic internal secretion	endocrine/metabolic
525	690.1	-0.0810705	-0.312348	0.150207	0.492061	2	0	0.492061	-0.687034	0.0556982	690.1	Seborrheic dermatitis	dermatologic
526	367.9	-0.026562	-0.1028	0.0496763	0.494692	2	0	0.494692	-0.682866	0.0181383	367.9	Blindness and low vision	sense organs
527	368.9	-0.106562	-0.448527	0.235404	0.541362	2	0	0.541362	-0.610755	0.0650831	368.9	Subjective visual disturbances	sense organs
528	610.4	0.0715584	-0.215435	0.358552	0.625059	2	0	0.625059	0.488693	0.0349701	610.4	Benign neoplasm of breast	genitourinary
529	550.4	-0.0873823	-0.332856	0.158091	0.485367	2	0	0.485367	-0.697697	0.0609663	550.4	Umbilical hernia	digestive
530	858	-0.0151038	-0.141747	0.111539	0.815179	2	0	0.815179	-0.23375	0.00353051	858	Complication of internal orthopedic device	injuries & poisonings
531	496.21	0.0854643	-0.188256	0.359184	0.540561	2	0	0.540561	0.611965	0.0523012	496.21	Obstructive chronic bronchitis	respiratory
532	249	-0.0166346	-0.026153	-0.00711628	0.000614111	2	0	0.000614111	-3.4253	0.0569787	249	Secondary diabetes mellitus	endocrine/metabolic
533	709	-0.0945986	-0.34661	0.157413	0.461902	2	0	0.461902	-0.735719	0.069598	709	Diffuse diseases of connective tissue	dermatologic
534	550.5	0.00137906	0.00128212	0.001476	4.36485e-171	2	0	4.36485e-171	27.8824	0.0384515	550.5	Ventral hernia	digestive
535	596.5	0.02974	-0.145102	0.204582	0.738845	2	0	0.738845	0.333384	0.00991484	596.5	Functional disorders of bladder	genitourinary
536	255	0.0896293	-0.178189	0.357447	0.511868	2	0	0.511868	0.655931	0.0587906	255	Disorders of adrenal glands	endocrine/metabolic
537	700	-0.0685344	-0.244493	0.107424	0.445231	2	0	0.445231	-0.763389	0.0523184	700	Corns and callosities	dermatologic
538	287	0.00591099	0.00334069	0.0084813	6.56344e-06	2	0	6.56344e-06	4.50738	0.0266431	287	Purpura and other hemorrhagic conditions	hematopoietic
539	458.9	0.00972617	0.00333489	0.0161174	0.00285764	2	0	0.00285764	2.98265	0.0290098	458.9	Hypotension NOS	circulatory system
540	526.4	-0.0793265	-0.290125	0.131472	0.460781	2	0	0.460781	-0.737561	0.0585081	526.4	Temporomandibular joint disorders	digestive
541	470	-0.0858393	-0.309214	0.137535	0.45134	2	0	0.45134	-0.753183	0.0646527	470	Septal Deviations/Turbinate Hypertrophy	respiratory
542	599.8	-0.0675181	-0.234381	0.0993445	0.427739	2	0	0.427739	-0.793066	0.0535464	599.8	Other symptoms involving urinary system	genitourinary
543	452.2	0.0611206	-0.059392	0.181633	0.320204	2	0	0.320204	0.994038	0.0607562	452.2	Deep vein thrombosis [DVT]	circulatory system
544	715	0.0523867	-0.104746	0.20952	0.513477	2	0	0.513477	0.653434	0.0342312	715	Other inflammatory spondylopathies	musculoskeletal
545	262	-0.0884699	-0.305219	0.128279	0.423715	2	0	0.423715	-0.799994	0.0707754	262	Mineral deficiency NEC	endocrine/metabolic
546	275.3	-0.00207478	-0.00230785	-0.00184171	3.59428e-68	2	0	3.59428e-68	-17.4475	0.0361998	275.3	Disorders of magnesium metabolism	endocrine/metabolic
547	513	-0.0638747	-0.223552	0.0958024	0.433021	2	0	0.433021	-0.784033	0.0500798	513	Respiratory abnormalities	respiratory
548	727.4	-0.0670478	-0.225477	0.0913816	0.406842	2	0	0.406842	-0.829463	0.0556137	727.4	Ganglion and cyst of synovium tendon and bursa	musculoskeletal
549	772.3	0.0157067	-0.00101135	0.0324248	0.0655634	2	0	0.0655634	1.8414	0.0289223	772.3	Muscle weakness	symptoms
550	512.1	-0.0551849	-0.183144	0.0727742	0.397958	2	0	0.397958	-0.845273	0.0466463	512.1	Wheezing	respiratory
551	292.1	-0.00286353	-0.0911521	0.085425	0.949313	2	10.4871	0.949313	-0.0635691	0.000182032	292.1	Aphasia/speech disturbance	mental disorders
552	619.5	-0.0730272	-0.233767	0.0877126	0.373224	2	0	0.373224	-0.89045	0.0650271	619.5	Noninflammatory disorders of vulva and perineum	genitourinary
553	798.1	-0.0717746	-0.22323	0.079681	0.35298	2	0	0.35298	-0.928824	0.066666	798.1	Chronic fatigue syndrome	symptoms
554	535.8	-0.073782	-0.227272	0.0797077	0.346117	2	0	0.346117	-0.942148	0.0695135	535.8	Other specified gastritis	digestive
555	715.1	-0.0176823	-0.0800981	0.0447335	0.57872	2	36.5159	0.57872	-0.555256	0.00981821	715.1	Sacroiliitis NEC	musculoskeletal
556	70.3	0.0656146	-0.0790324	0.210261	0.373962	2	0	0.373962	0.889076	0.0583363	70.3	Viral hepatitis C	infectious diseases
557	1002	-0.0475171	-0.135376	0.0403421	0.289139	2	0	0.289139	-1.06001	0.0503687	1002	Symptoms concerning nutrition metabolism and development
558	726.3	-0.0551362	-0.167743	0.0574701	0.337221	2	0	0.337221	-0.959671	0.0529126	726.3	Bursitis	musculoskeletal
559	244.1	-0.00892025	-0.0169236	-0.000916887	0.0289253	2	18.3272	0.0289253	-2.1845	0.0194863	244.1	Secondary hypothyroidism	endocrine/metabolic
560	681.5	-0.0569382	-0.169064	0.0551877	0.3196	2	0	0.3196	-0.995281	0.0566695	681.5	Cellulitis and abscess of leg except foot	dermatologic
561	727.5	0.061287	-0.0469926	0.169567	0.267278	2	0	0.267278	1.10935	0.067989	727.5	Rupture of synovium	musculoskeletal
562	281	-0.0353882	-0.143406	0.0726297	0.5208	2	0	0.5208	-0.642112	0.0227232	281	Other deficiency anemia	hematopoietic
563	577	0.0540041	-0.0419904	0.149999	0.27019	2	0	0.27019	1.10263	0.0595463	577	Diseases of pancreas	digestive
564	565.1	0.0567382	-0.0519079	0.165384	0.306048	2	0	0.306048	1.02355	0.0580744	565.1	Anal and rectal polyp	digestive
565	960.2	-0.000398299	-0.000407347	-0.000389251	0	2	13.4426	5e-302	-37.1465	0.0147954	960.2	Allergy/adverse effect of penicillin	injuries & poisonings
566	496.2	0.0415616	-0.0181415	0.101265	0.17244	2	0	0.17244	1.3644	0.0567068	496.2	Chronic bronchitis	respiratory
567	276.4	0.0463529	-0.0197843	0.11249	0.169547	2	0	0.169547	1.37366	0.0636732	276.4	Acid-base balance disorder	endocrine/metabolic
568	756	0.0522496	-0.038927	0.143426	0.261363	2	0	0.261363	1.12318	0.0586855	756	Other congenital musculoskeletal anomalies	congenital anomalies
569	250.1	0.0468981	-0.0314493	0.125245	0.240708	2	0	0.240708	1.17322	0.0550217	250.1	Type 1 diabetes	endocrine/metabolic
570	967	-0.0229048	-0.045413	-0.000396592	0.0460976	2	0	0.0460976	-1.9945	0.0456836	967	Adverse effects of sedatives or other central nervous system depressants and anesthetics	injuries & poisonings
571	573.3	-0.0480997	-0.12607	0.0298709	0.226627	2	0	0.226627	-1.20909	0.058157	573.3	Hepatomegaly	digestive
572	695.7	-0.0418962	-0.0997853	0.0159929	0.156048	2	0	0.156048	-1.41849	0.0594293	695.7	Prurigo and Lichen	dermatologic
573	477	-0.0416509	-0.100344	0.0170425	0.164268	2	0	0.164268	-1.39086	0.0579305	477	Epistaxis or throat hemorrhage	respiratory
574	269	0.0359814	-0.0195299	0.0914927	0.203938	2	0	0.203938	1.27041	0.0457112	269	Proteinuria	endocrine/metabolic
575	707	0.0370683	-0.0150132	0.0891498	0.163022	2	0	0.163022	1.39498	0.0517095	707	Chronic ulcer of skin	dermatologic
576	8.5	0.039435	-0.00989817	0.0887682	0.117181	2	0	0.117181	1.56672	0.0617835	8.5	Bacterial enteritis	infectious diseases
577	420	0.0384917	-0.00438714	0.0813706	0.0785044	2	0	0.0785044	1.75943	0.0677235	420	Carditis	circulatory system
578	370	-0.0395677	-0.0838128	0.00467747	0.0796428	2	0	0.0796428	-1.75276	0.0693527	370	Keratitis	sense organs
579	507	0.0292975	-0.00363649	0.0622315	0.0812377	2	0	0.0812377	1.74355	0.0510816	507	Pleurisy; pleural effusion	respiratory
580	356	-0.0269197	-0.0574049	0.00356541	0.083499	2	0	0.083499	-1.73074	0.0465909	356	Hereditary and idiopathic peripheral neuropathy	neurological
581	509.1	0.0290105	-0.00295661	0.0609776	0.0752908	2	0	0.0752908	1.77869	0.0516007	509.1	Respiratory failure	respiratory
582	214	-0.0271355	-0.0553035	0.0010325	0.0590096	2	0	0.0590096	-1.88812	0.0512351	214	Lipoma	neoplasms
583	381.2	0.0310749	0.00119098	0.0609588	0.0415424	2	0	0.0415424	2.03808	0.063333	381.2	Eustachian tube disorders	sense organs
584	519.9	0.029043	0.00106197	0.0570241	0.0419163	2	0	0.0419163	2.03435	0.0590837	519.9	Symptoms involving respiratory system and other chest symptoms	respiratory
585	418.1	0.0203817	0.00111541	0.039648	0.0381319	2	0	0.0381319	2.07343	0.0422601	418.1	Precordial pain	circulatory system
586	695.8	-0.0279069	-0.0534657	-0.00234815	0.0323523	2	0	0.0323523	-2.14003	0.0597217	695.8	Other specified erythematous conditions	dermatologic
587	560	0.0246328	0.00525917	0.0440065	0.012702	2	0	0.012702	2.49202	0.0613854	560	Intestinal obstruction without mention of hernia	digestive
588	736	0.0257579	-3.03158e-05	0.0515462	0.0502699	2	26.0643	0.0502699	1.95766	0.0504253	736	Other acquired deformities of limbs	musculoskeletal
589	214.1	-0.0311702	-0.0592626	-0.00307777	0.0296529	2	0	0.0296529	-2.1747	0.0677856	214.1	Lipoma of skin and subcutaneous tissue	neoplasms
590	401.3	0.0200852	0.00198406	0.0381864	0.0296455	2	0	0.0296455	2.17479	0.0436812	401.3	Other hypertensive complications	circulatory system
591	723	0.0293359	0.00316503	0.0555067	0.0280207	2	0	0.0280207	2.197	0.0644508	723	Other disorders of cervical region	musculoskeletal
592	327.7	0.0265641	0.00407813	0.04905	0.0205894	2	0	0.0205894	2.31543	0.0615072	327.7	Sleep related movement disorders	neurological
593	527	-0.0253003	-0.0461464	-0.00445417	0.0173715	2	0	0.0173715	-2.37875	0.060183	527	Diseases of the salivary glands	digestive
594	250.3	0.0118997	0.00509616	0.0187033	0.000607904	2	37.8726	0.000607904	3.42806	0.040793	250.3	Insulin pump user	endocrine/metabolic
595	276.41	0.0145675	0.00650665	0.0226283	0.000397055	2	0	0.000397055	3.54203	0.0515985	276.41	Acidosis	endocrine/metabolic
596	197	-0.0161794	-0.0242681	-0.0080907	8.83968e-05	2	0	8.83968e-05	-3.92041	0.0634299	197	Chemotherapy	neoplasms
597	994.2	-0.0142906	-0.0213831	-0.0071982	7.84276e-05	2	0	7.84276e-05	-3.94915	0.056436	994.2	Sepsis	injuries & poisonings
598	112.3	0.0149485	0.00826484	0.0216322	1.16734e-05	2	0	1.16734e-05	4.3836	0.0655283	112.3	Candidiasis of skin and nails	infectious diseases
599	756.5	0.0121588	0.00769773	0.0166199	9.19612e-08	2	0	9.19612e-08	5.34193	0.0649516	756.5	Congenital osteodystrophies	congenital anomalies
600	450	0.0102975	0.00685306	0.0137418	4.64076e-09	2	0	4.64076e-09	5.85957	0.0603386	450	Noninfectious disorders of lymphatic channels	circulatory system
601	292.4	0.00832705	0.00579345	0.0108606	1.18129e-10	2	0	1.18129e-10	6.44172	0.0536405	292.4	Altered mental status	mental disorders
602	260	0.00513367	0.00406954	0.0061978	3.21616e-21	2	0	3.21616e-21	9.45546	0.0485412	260	Protein-calorie malnutrition	endocrine/metabolic
603	415.11	-0.00521066	-0.00609472	-0.0043266	7.20754e-31	2	11.0197	7.20754e-31	-11.5521	0.0601939	415.11	Pulmonary embolism and infarction acute	circulatory system
604	288.1	0.00374732	0.00323943	0.00425522	2.13863e-47	2	0	2.13863e-47	14.4609	0.0541898	288.1	Decreased white blood cell count	hematopoietic
605	851	-0.00333511	-0.00366832	-0.0030019	1.09933e-85	2	0	1.09933e-85	-19.6174	0.0654261	851	Complications of transplants and reattached limbs	injuries & poisonings
606	722.9	0.0023855	0.00219579	0.00257522	4.12563e-134	2	0	4.12563e-134	24.6454	0.0587917	722.9	Other and unspecified disc disorder	musculoskeletal
607	415.1	0.00175767	0.00165689	0.00185845	4.41461e-256	2	3.3855	4.41461e-256	34.1824	0.0600814	415.1	Acute pulmonary heart disease	circulatory system
608	626.14	-0.185193	-3.42752	3.05713	0.910863	1	0	0.910863	-0.11195	0.0207323	626.14	Irregular menstrual bleeding	genitourinary
609	655	-0.928466	-44.3698	42.5129	0.966586	1	0	0.966586	-0.0418908	0.0388942	655	Known or suspected fetal abnormality affecting management of mother	pregnancy complications
610	649	-1.10707	-81.7098	79.4957	0.978523	1	0	0.978523	-0.0269205	0.0298029	649	Other conditions or status of the mother complicating pregnancy childbirth or the puerperium	pregnancy complications
611	654	-1.04378	-77.0381	74.9506	0.978523	1	0	0.978523	-0.0269205	0.028099	654	Other and unspecified complications of birth; puerperium affecting management of mother	pregnancy complications
612	626.4	-0.970491	-71.6291	69.6881	0.978523	1	0	0.978523	-0.0269205	0.0261261	626.4	Premenstrual tension syndromes	genitourinary
613	636	-1.06595	-78.6746	76.5427	0.978523	1	0	0.978523	-0.0269205	0.0286959	636	Early or threatened labor; hemorrhage in early pregnancy	pregnancy complications
614	638	-1.20288	-88.7807	86.375	0.978523	1	0	0.978523	-0.0269205	0.032382	638	Other high-risk pregnancy	pregnancy complications
615	650	-0.927527	-68.458	66.603	0.978523	1	0	0.978523	-0.0269205	0.0249694	650	Normal delivery	pregnancy complications
616	626.8	-0.903931	-66.7165	64.9087	0.978523	1	0	0.978523	-0.0269205	0.0243342	626.8	Infertility female	genitourinary
617	665	-0.916441	-40.1739	38.341	0.963506	1	0	0.963506	-0.0457549	0.0419317	665	Obstetrical/birth trauma	pregnancy complications
618	625.1	-0.447331	-15.8301	14.9355	0.954548	1	0	0.954548	-0.0569967	0.0254964	625.1	Dyspareunia	genitourinary
619	634	-0.674778	-24.3332	22.9836	0.955419	1	0	0.955419	-0.0559025	0.0377218	634	Miscarriage; stillbirth	pregnancy complications
620	256	-0.880452	-64.9836	63.2227	0.978523	1	0	0.978523	-0.0269205	0.0237022	256	Ovarian dysfunction	endocrine/metabolic
621	474	-0.621961	-45.9051	44.6612	0.978523	1	0	0.978523	-0.0269205	0.0167435	474	Acute and chronic tonsillitis	respiratory
622	743.12	0.463508	-33.2832	34.2102	0.978523	1	0	0.978523	0.0269205	0.0124779	743.12	Senile osteoporosis	musculoskeletal
623	301	-0.686003	-50.6319	49.2599	0.978523	1	0	0.978523	-0.0269205	0.0184675	301	Personality disorders	mental disorders
624	661	-0.970243	-71.6108	69.6703	0.978523	1	0	0.978523	-0.0269205	0.0261194	661	Fetal distress and abnormal forces of labor	pregnancy complications
625	652	-0.947238	-69.9128	68.0184	0.978523	1	0	0.978523	-0.0269205	0.0255001	652	Malposition and malpresentation of fetus or obstruction	pregnancy complications
626	300.8	-0.517423	-38.1894	37.1546	0.978523	1	0	0.978523	-0.0269205	0.0139293	300.8	Acute reaction to stress	mental disorders
627	302	-0.569031	-41.9985	40.8605	0.978523	1	0	0.978523	-0.0269205	0.0153186	302	Sexual and gender identity disorders	mental disorders
628	474.1	-0.719329	-53.0916	51.6529	0.978523	1	0	0.978523	-0.0269205	0.0193647	474.1	Acute tonsillitis	respiratory
629	258.1	-0.845996	-62.4405	60.7485	0.978523	1	0	0.978523	-0.0269205	0.0227746	258.1	Postablative ovarian failure	endocrine/metabolic
630	427.22	0.518995	-37.2675	38.3055	0.978523	1	0	0.978523	0.0269205	0.0139716	427.22	Atrial flutter	circulatory system
631	305	-0.645195	-47.6199	46.3296	0.978523	1	0	0.978523	-0.0269205	0.0173689
632	305.2	-0.645195	-47.6199	46.3296	0.978523	1	0	0.978523	-0.0269205	0.0173689	305.2	Eating disorder	mental disorders
633	258	-0.781327	-57.6675	56.1048	0.978523	1	0	0.978523	-0.0269205	0.0210337	258	Iatrogenic endocrine disorders	endocrine/metabolic
634	313.1	-0.503299	-37.147	36.1404	0.978523	1	0	0.978523	-0.0269205	0.013549	313.1	Attention deficit hyperactivity disorder	mental disorders
635	520	-0.725098	-53.5173	52.0672	0.978523	1	0	0.978523	-0.0269205	0.01952	520	Disorders of tooth development	digestive
636	313	-0.458368	-33.8308	32.9141	0.978523	1	0	0.978523	-0.0269205	0.0123395	313	Pervasive developmental disorders	mental disorders
637	379.3	-0.055422	-0.477244	0.3664	0.796778	1	0	0.796778	-0.257519	0.0142722	379.3	Aphakia and other disorders of lens	sense organs
638	702.1	0.202812	-14.5634	14.969	0.978523	1	0	0.978523	0.0269205	0.0054598	702.1	Actinic keratosis	dermatologic
639	669	-0.764105	-56.3964	54.8682	0.978523	1	0	0.978523	-0.0269205	0.0205701	669	Complications of labor and delivery NEC	pregnancy complications
640	172	0.202758	-4.24639	4.65191	0.928826	1	0	0.928826	0.0893218	0.0181107	172	Skin cancer	neoplasms
641	302.1	-0.520717	-38.4326	37.3912	0.978523	1	0	0.978523	-0.0269205	0.014018	302.1	Decreased libido	mental disorders
642	871.2	-0.319517	-23.5826	22.9436	0.978523	1	0	0.978523	-0.0269205	0.00860154	871.2	Open wound of finger(s)	injuries & poisonings
643	614.1	-0.281739	-6.98989	6.42641	0.934393	1	0	0.934393	-0.0823191	0.0231925	614.1	Pelvic peritoneal adhesions female (postoperative) (postinfection)	genitourinary
644	303.4	-0.534254	-39.4317	38.3632	0.978523	1	0	0.978523	-0.0269205	0.0143824	303.4	Somatoform disorder	mental disorders
645	622.2	0.129008	-1.7808	2.03882	0.894669	1	0	0.894669	0.132399	0.0170805	622.2	Mucous polyp of cervix	genitourinary
646	340.1	-0.313933	-23.1705	22.5426	0.978523	1	0	0.978523	-0.0269205	0.00845123	340.1	Migrain with aura	neurological
647	619.3	-0.0351785	-0.168159	0.0978023	0.604113	1	0	0.604113	-0.518495	0.0182399	619.3	Noninflammatory disorders of cervix	genitourinary
648	362.21	0.463575	-33.2879	34.2151	0.978523	1	0	0.978523	0.0269205	0.0124796	362.21	Macular degeneration dry	sense organs
649	297	-0.415326	-30.654	29.8234	0.978523	1	0	0.978523	-0.0269205	0.0111808	297	Suicidal ideation or attempt	mental disorders
650	172.2	0.204869	-14.711	15.1208	0.978523	1	0	0.978523	0.0269205	0.00551516	172.2	Other non-epithelial cancer of skin	neoplasms
651	474.2	-0.352397	-6.56477	5.85997	0.911473	1	0	0.911473	-0.111181	0.0391799	474.2	Chronic tonsillitis and adenoiditis	respiratory
652	612.2	-0.255638	-4.38365	3.87237	0.903391	1	0	0.903391	-0.121378	0.0310289	612.2	Hypertrophy of breast (Gynecomastia)	genitourinary
653	614.3	-0.584243	-43.1213	41.9528	0.978523	1	0	0.978523	-0.0269205	0.0157281	614.3	Pelvic inflammatory disease (PID)	genitourinary
654	371.2	-0.335113	-24.7337	24.0634	0.978523	1	0	0.978523	-0.0269205	0.00902138	371.2	Conjunctivitis noninfectious	sense organs
655	781.1	0.434322	-31.1874	32.056	0.978523	1	0	0.978523	0.0269205	0.0116921	781.1	Loss of height	symptoms
656	362.29	0.0276184	-0.080085	0.135322	0.615243	1	0	0.615243	0.502604	0.0138811	362.29	Macular degeneration (senile) of retina NOS	sense organs
657	426.3	0.327759	-23.5354	24.1909	0.978523	1	0	0.978523	0.0269205	0.00882342	426.3	Bundle branch block	circulatory system
658	172.22	0.354458	-25.4526	26.1615	0.978523	1	0	0.978523	0.0269205	0.00954218	172.22	Squamous cell carcinoma	neoplasms
659	523.3	-0.483875	-35.7134	34.7457	0.978523	1	0	0.978523	-0.0269205	0.0130261	523.3	Periodontitis (acute or chronic)	digestive
660	627.21	-0.526542	-38.8625	37.8094	0.978523	1	0	0.978523	-0.0269205	0.0141748	627.21	Symptomatic artificial menopause	genitourinary
661	427.8	0.170207	-1.39653	1.73695	0.831382	1	0	0.831382	0.21293	0.0362422	427.8	Sinoatrial node dysfunction (Bradycardia)	circulatory system
662	371.21	-0.33359	-24.6213	23.9541	0.978523	1	0	0.978523	-0.0269205	0.00898039	371.21	Allergic conjunctivitis	sense organs
663	1000	-0.336086	-6.70457	6.0324	0.917617	1	0	0.917617	-0.103436	0.0347632	1000	Burns
664	220	-0.0802513	-0.601641	0.441138	0.762896	1	0	0.762896	-0.30168	0.0242102	220	Benign neoplasm of ovary	neoplasms
665	292.2	0.109392	-0.569609	0.788393	0.752177	1	0	0.752177	0.315771	0.0345428	292.2	Mild cognitive impairment	mental disorders
666	795	-0.401262	-29.616	28.8135	0.978523	1	0	0.978523	-0.0269205	0.0108022	795	Other and nonspecific abnormal cytological histological and immunological findings	symptoms
667	621	0.00958309	0.00263243	0.0165338	0.00688594	1	0	0.00688594	2.70231	0.0258965	621	Endometrial hyperplasia	genitourinary
668	172.1	0.197993	-14.2173	14.6133	0.978523	1	0	0.978523	0.0269205	0.00533007	172.1	Melanomas of skin dx or hx	neoplasms
669	731	0.305976	-21.9712	22.5832	0.978523	1	0	0.978523	0.0269205	0.00823701	731	Osteitis deformans and osteopathies associated with other disorders classified elsewhere	musculoskeletal
670	297.1	-0.52485	-8.97005	7.92035	0.90305	1	0	0.90305	-0.12181	0.0639318	297.1	Suicidal ideation	mental disorders
671	1004	-0.276262	-5.09104	4.53851	0.910458	1	0	0.910458	-0.112461	0.0310688	1004	Other signs and symptoms involving emotional state
672	523.1	-0.505118	-8.55	7.53977	0.902057	1	0	0.902057	-0.123063	0.0621615	523.1	Gingivitis	digestive
673	426.32	0.0445575	-0.139331	0.228446	0.634843	1	0	0.634843	0.474921	0.0211613	426.32	Left bundle branch block	circulatory system
674	528.12	-0.411713	-6.92916	6.10573	0.901462	1	0	0.901462	-0.123815	0.0509762	528.12	Oral aphthae	digestive
675	218.2	-0.147904	-1.10721	0.811404	0.762508	1	0	0.762508	-0.302189	0.0446951	218.2	Other benign neoplasm of uterus	neoplasms
676	496.3	0.357948	-5.28372	5.99962	0.901033	1	0	0.901033	0.124356	0.0445131	496.3	Bronchiectasis	respiratory
677	362.26	0.294731	-4.32179	4.91125	0.900419	1	0	0.900419	0.125132	0.0368803	362.26	Macular puckering of retina	sense organs
678	274.21	0.166803	-1.25583	1.58943	0.81824	1	0	0.81824	0.22981	0.038333	274.21	Chondrocalcinosis	endocrine/metabolic
679	769	-0.324706	-5.34972	4.70031	0.899217	1	0	0.899217	-0.126651	0.0411243	769	Nonallopathic lesions NEC	symptoms
680	426.2	0.352804	-5.10066	5.80627	0.899099	1	0	0.899099	0.126799	0.0447354	426.2	Atrioventricular [AV] block	circulatory system
681	290.1	-0.017292	-0.0464922	0.0119082	0.245769	1	0	0.245769	-1.16069	0.0200706	290.1	Dementias	mental disorders
682	279.2	-0.41762	-6.77013	5.93489	0.897475	1	0	0.897475	-0.128852	0.0538112	279.2	Autoimmune disease NEC	endocrine/metabolic
683	724.2	-0.406011	-6.54089	5.72886	0.896792	1	0	0.896792	-0.129714	0.0526655	724.2	Disorders of coccyx	musculoskeletal
684	274.2	0.38478	-5.3789	6.14846	0.895895	1	0	0.895895	0.130848	0.0503479	274.2	Crystal arthropathies	endocrine/metabolic
685	426.91	-0.0299504	-0.106528	0.0466269	0.44333	1	0	0.44333	-0.766582	0.0229594	426.91	Cardiac pacemaker in situ	circulatory system
686	574.12	-0.30638	-4.78487	4.17211	0.893334	1	0	0.893334	-0.134086	0.0410814	574.12	Cholelithiasis with other cholecystitis	digestive
687	574.3	-0.318683	-4.9293	4.29193	0.892237	1	0	0.892237	-0.135474	0.0431734	574.3	Cholecystitis without cholelithiasis	digestive
688	528.1	-0.293217	-4.52814	3.94171	0.892054	1	0	0.892054	-0.135706	0.0397913	528.1	Stomatitis and mucositis	digestive
689	523.31	-0.503795	-7.73863	6.73104	0.891439	1	0	0.891439	-0.136484	0.06876	523.31	Acute periodontitis	digestive
690	1010.1	-0.304765	-4.68064	4.07111	0.89142	1	0	0.89142	-0.136507	0.0416026
691	613.1	-0.185897	-2.40165	2.02985	0.869385	1	0	0.869385	-0.16444	0.0305688	613.1	Inflammatory disease of breast	genitourinary
692	704.2	-0.3789	-5.72774	4.96994	0.889575	1	0	0.889575	-0.138842	0.0526073	704.2	Hirsutism	dermatologic
693	362.27	0.320476	-4.16683	4.80778	0.888676	1	0	0.888676	0.13998	0.0448601	362.27	Drusen (degenerative) of retina	sense organs
694	569.2	-0.204826	-2.62357	2.21392	0.868174	1	0	0.868174	-0.165978	0.0339965	569.2	Gastrointestinal complications	digestive
695	300.3	-0.488021	-7.21029	6.23425	0.88685	1	0	0.88685	-0.142291	0.0694412	300.3	Obsessive-compulsive disorders	mental disorders
696	172.21	0.183828	-2.34408	2.71174	0.886661	1	0	0.886661	0.14253	0.0262011	172.21	Basal cell carcinoma	neoplasms
697	752	-0.458845	-6.71434	5.79665	0.885684	1	0	0.885684	-0.143767	0.0659669	752	Nervous system congenital anomalies	congenital anomalies
698	526.41	-0.261901	-3.81715	3.29334	0.885196	1	0	0.885196	-0.144386	0.0378148	526.41	Temporomandibular joint disorder unspecified	digestive
699	743.2	0.147302	-1.30126	1.59586	0.842021	1	0	0.842021	0.199309	0.0293586	743.2	Pathologic fracture	musculoskeletal
700	523.32	-0.199961	-2.257	1.85708	0.848895	1	0	0.848895	-0.190528	0.0380982	523.32	Chronic periodontitis	digestive
701	426.9	0.386542	-4.81056	5.58365	0.884097	1	0	0.884097	0.145778	0.0563492	426.9	Cardiac pacemaker/device in situ	circulatory system
702	526.9	-0.433614	-6.06871	5.20148	0.880118	1	0	0.880118	-0.15082	0.0653975	526.9	Jaw disease NOS	digestive
703	594.8	-0.217849	-2.61626	2.18056	0.858701	1	0	0.858701	-0.178028	0.0387831	594.8	Renal colic	genitourinary
704	681.2	-0.1876	-2.14151	1.76631	0.850732	1	0	0.850732	-0.188185	0.0353035	681.2	Cellulitis and abscess of face/neck	dermatologic
705	303.3	-0.282258	-3.91133	3.34681	0.878838	1	0	0.878838	-0.152443	0.0430282	303.3	Psychogenic disorder	mental disorders
706	805	0.0101238	0.000407824	0.0198399	0.0411248	1	0	0.0411248	2.04227	0.0206756	805	Fracture of vertebral column without mention of spinal cord injury	injuries & poisonings
707	733.6	-0.36885	-5.09299	4.35529	0.878373	1	0	0.878373	-0.153033	0.0564461	733.6	Costochondritis	musculoskeletal
708	557	-0.168907	-2.05098	1.71317	0.860372	1	0	0.860372	-0.1759	0.0297107	557	Intestinal malabsorption (non-celiac)	digestive
709	938.1	-0.402242	-5.49782	4.69334	0.877041	1	0	0.877041	-0.154721	0.0622353	938.1	Acute dermatitis due to solar radiation	dermatologic
710	717	0.0248345	-0.0341375	0.0838065	0.409144	1	0	0.409144	0.825401	0.0204984	717	Polymyalgia Rheumatica	musculoskeletal
711	345.1	-0.380643	-5.15372	4.39244	0.875792	1	0	0.875792	-0.156306	0.0594966	345.1	Epilepsy	neurological
712	540	-0.308826	-4.17675	3.55909	0.875645	1	0	0.875645	-0.156492	0.0483288	540	Appendiceal conditions	digestive
713	946	-0.250834	-3.2418	2.74013	0.869438	1	0	0.869438	-0.164373	0.0412303	946	Anaphylactic shock NOS	injuries & poisonings
714	695.3	-0.109622	-1.2267	1.00745	0.847475	1	0	0.847475	-0.192342	0.0210849	695.3	Rosacea	dermatologic
715	394.1	0.361163	-4.10172	4.82404	0.873972	1	0	0.873972	0.158615	0.0572857	394.1	Mitral valve stenosis and aortic valve stenosis	circulatory system
716	525.1	-0.356717	-4.68854	3.97511	0.871777	1	0	0.871777	-0.161402	0.0575747	525.1	Loss of teeth or edentulism	digestive
717	465.4	-0.225753	-2.95088	2.49937	0.871015	1	0	0.871015	-0.162369	0.0366554	465.4	Acute laryngitis and tracheitis	respiratory
718	526.42	-0.277491	-3.60691	3.05193	0.870238	1	0	0.870238	-0.163356	0.0453299	526.42	Arthralgia/ankylosis of temporomandibular joint	digestive
719	695.42	-0.299363	-4.78976	4.19103	0.896038	1	0	0.896038	-0.130668	0.0391173	695.42	Systemic lupus erythematosus	dermatologic
720	800.1	0.0140514	-0.00792887	0.0360317	0.210215	1	0	0.210215	1.25298	0.0176061	800.1	Fracture of neck of femur	injuries & poisonings
721	395.6	0.0203241	-0.00764253	0.0482908	0.154335	1	0	0.154335	1.42438	0.0289494	395.6	Heart valve replaced	circulatory system
722	568.1	-0.273384	-3.51476	2.96799	0.8687	1	0	0.8687	-0.16531	0.0451932	568.1	Peritoneal adhesions (postoperative) (postinfection)	digestive
723	80	-0.177001	-3.44327	3.08927	0.915413	1	0	0.915413	-0.106214	0.0187999	80	Postoperative infection	infectious diseases
724	245	-0.176768	-2.24972	1.89618	0.867263	1	0	0.867263	-0.167136	0.0295444	245	Thyroiditis	endocrine/metabolic
725	753	-0.339269	-4.25074	3.5722	0.865007	1	0	0.865007	-0.170004	0.057677	753	Congenital anomalies of the eye	congenital anomalies
726	457.2	0.351483	-3.6957	4.39867	0.864838	1	0	0.864838	0.170219	0.059829	457.2	Encounter for long-term (current) use of antiplatelets/antithrombotics	circulatory system
727	427.11	0.0327021	-0.0770709	0.142475	0.559289	1	0	0.559289	0.583898	0.0190947	427.11	Paroxysmal supraventricular tachycardia	circulatory system
728	696	-0.17256	-2.13362	1.7885	0.86307	1	0	0.86307	-0.172467	0.029761	696	Psoriasis and related disorders	dermatologic
729	575.7	-0.274128	-3.37729	2.82903	0.862539	1	0	0.862539	-0.173143	0.0474632	575.7	Other disorders of gallbladder	digestive
730	540.1	-0.196015	-2.04658	1.65456	0.835537	1	0	0.835537	-0.207606	0.0406937	540.1	Appendicitis	digestive
731	1001	-0.187664	-2.29523	1.9199	0.861453	1	0	0.861453	-0.174525	0.032752	1001	Foreign body injury
732	331	0.138409	-0.734793	1.01161	0.756048	1	0	0.756048	0.310675	0.0430002	331	Other cerebral degenerations	neurological
733	253	-0.296108	-3.60622	3.01401	0.860818	1	0	0.860818	-0.175333	0.0519174	253	Disorders of the pituitary gland and its hypothalamic control	endocrine/metabolic
734	333.1	0.130598	-0.952512	1.21371	0.813176	1	0	0.813176	0.236331	0.0308644	333.1	Essential tremor	neurological
735	755	-0.240512	-2.91756	2.43653	0.860223	1	0	0.860223	-0.176091	0.0423519	755	Congenital anomalies of limbs	congenital anomalies
736	245.21	-0.181511	-2.19817	1.83514	0.85997	1	0	0.85997	-0.176412	0.0320207	245.21	Chronic lymphocytic thyroiditis	endocrine/metabolic
737	724.1	-0.195893	-2.36659	1.97481	0.859604	1	0	0.859604	-0.176879	0.0346493	724.1	Disorders of sacrum	musculoskeletal
738	709.7	-0.321553	-3.88184	3.23873	0.859492	1	0	0.859492	-0.177021	0.0569214	709.7	Unspecified diffuse connective tissue disease	dermatologic
739	871.3	-0.313807	-3.78129	3.15367	0.85921	1	0	0.85921	-0.17738	0.0556629	871.3	Open wound of foot except toe(s) alone	injuries & poisonings
740	817	-0.234266	-2.80071	2.33217	0.858008	1	0	0.858008	-0.17891	0.0419127	817	Concussion	injuries & poisonings
741	536.3	-0.320051	-3.81814	3.17803	0.857681	1	0	0.857681	-0.179327	0.0573938	536.3	Gastroparesis	digestive
742	389.3	0.115174	-0.524253	0.7546	0.724061	1	0	0.724061	0.353036	0.0406605	389.3	Degenerative and vascular disorders of ear	sense organs
743	913	-0.238034	-2.81579	2.33972	0.856376	1	0	0.856376	-0.180989	0.0430815	913	Toxic effect of venom	injuries & poisonings
744	278.3	-0.3302	-3.89523	3.23483	0.855944	1	0	0.855944	-0.181539	0.0599442	278.3	Localized adiposity	endocrine/metabolic
745	440.2	-0.0700494	-0.326634	0.186536	0.592586	1	0	0.592586	-0.535093	0.037483	440.2	Atherosclerosis of the extremities	circulatory system
746	353.1	-0.372352	-4.35994	3.61523	0.854782	1	0	0.854782	-0.183021	0.0681482	353.1	Nerve plexus lesions	neurological
747	705.1	-0.321525	-3.76254	3.11949	0.854688	1	0	0.854688	-0.183141	0.0588843	705.1	Dyshidrosis	dermatologic
748	245.2	-0.172098	-2.00815	1.66395	0.854237	1	0	0.854237	-0.183716	0.031617	245.2	Chronic thyroiditis	endocrine/metabolic
749	364.5	0.152333	-1.11305	1.41772	0.813468	1	0	0.813468	0.235955	0.0359438	364.5	Corneal dystrophy	sense organs
750	362.4	0.0414552	-0.0776579	0.160568	0.495148	1	0	0.495148	0.682143	0.0282784	362.4	Retinal vascular changes and abnomalities	sense organs
751	362.23	0.284684	-2.73306	3.30243	0.853307	1	0	0.853307	0.1849	0.0526381	362.23	Cystoid macular degeneration of retina	sense organs
752	386.3	-0.139673	-1.34448	1.06514	0.820251	1	0	0.820251	-0.227222	0.0317367	386.3	Labyrinthitis	sense organs
753	540.11	-0.0874207	-0.570652	0.395811	0.722904	1	0	0.722904	-0.354581	0.0309977	540.11	Acute appendicitis	digestive
754	277.5	-0.22433	-2.54272	2.09406	0.849582	1	0	0.849582	-0.189652	0.0425445	277.5	Other disorders of lipoid metabolism	endocrine/metabolic
755	938	-0.105797	-1.19742	0.985822	0.849342	1	0	0.849342	-0.189959	0.0200971	938	Dermatitis due to solar radiation	dermatologic
756	577.3	0.261512	-2.39883	2.92186	0.847219	1	0	0.847219	0.192668	0.050385	577.3	Cyst and pseudocyst of pancreas	digestive
757	288.11	-0.208322	-2.32456	1.90792	0.847005	1	0	0.847005	-0.192941	0.0401939	288.11	Neutropenia	hematopoietic
758	727.2	-0.235936	-2.6299	2.15803	0.846829	1	0	0.846829	-0.193167	0.0455749	727.2	Bursitis disorders	musculoskeletal
759	277.51	-0.290866	-3.20837	2.62664	0.845075	1	0	0.845075	-0.195406	0.0568371	277.51	Lipoprotein disorders	endocrine/metabolic
760	259	-0.227464	-2.50449	2.04957	0.844771	1	0	0.844771	-0.195794	0.044536	259	Other endocrine disorders	endocrine/metabolic
761	110.2	-0.273298	-2.99954	2.45295	0.844231	1	0	0.844231	-0.196484	0.0536988	110.2	Dermatomycoses	infectious diseases
762	443.1	-0.142102	-2.00966	1.72545	0.881447	1	0	0.881447	-0.149136	0.0211924	443.1	Raynaud's syndrome	circulatory system
763	871.1	-0.201844	-2.20869	1.805	0.843724	1	0	0.843724	-0.197133	0.0397901	871.1	Open wound of hand except finger(s)	injuries & poisonings
764	568	-0.202675	-2.20409	1.79874	0.842669	1	0	0.842669	-0.198481	0.0402271	568	Other disorders of peritoneum	digestive
765	610.8	-0.107168	-0.924752	0.710416	0.797245	1	0	0.797245	-0.256914	0.0275328	610.8	Other specified benign mammary dysplasias	genitourinary
766	686.2	-0.272694	-2.9392	2.39381	0.841135	1	0	0.841135	-0.200442	0.0546592	686.2	Impetigo	dermatologic
767	41.2	-0.131847	-1.386	1.12231	0.836751	1	0	0.836751	-0.206052	0.0271673	41.2	Streptococcus infection	infectious diseases
768	353	-0.197015	-2.99486	2.60083	0.890227	1	0	0.890227	-0.138017	0.0271914	353	Nerve root and plexus disorders	neurological
769	327.5	-0.321475	-3.45077	2.80782	0.840423	1	0	0.840423	-0.201353	0.0647299	327.5	Parasomnia	neurological
770	335	-0.123238	-1.07566	0.829188	0.799795	1	0	0.799795	-0.253612	0.0312547	335	Multiple sclerosis	neurological
771	580.3	-0.335775	-3.57025	2.8987	0.838768	1	0	0.838768	-0.20347	0.0683201	580.3	Nephritis and nephropathy without mention of glomerulonephritis	genitourinary
772	592.2	-0.335306	-3.56075	2.89013	0.838545	1	0	0.838545	-0.203755	0.0683202	592.2	Urethritis and urethral syndrome	genitourinary
773	574.11	-0.117206	-1.1546	0.920192	0.824749	1	0	0.824749	-0.221441	0.0259542	574.11	Cholelithiasis with acute cholecystitis	digestive
774	270.32	0.0954336	-0.384804	0.575671	0.696911	1	0	0.696911	0.389494	0.0371708	270.32	Paraproteinemia	endocrine/metabolic
775	426.21	0.0492873	-0.11793	0.216505	0.563461	1	0	0.563461	0.577708	0.0284737	426.21	First degree AV block	circulatory system
776	426.31	0.00358434	0.00254035	0.00462832	1.70495e-11	1	0	1.70495e-11	6.72929	0.02412	426.31	Right bundle branch block	circulatory system
777	272.12	-0.154627	-1.58939	1.28014	0.832706	1	0	0.832706	-0.211233	0.0326623	272.12	Hyperglyceridemia	endocrine/metabolic
778	585.34	0.327829	-2.70346	3.35912	0.83213	1	0	0.83213	0.211971	0.0694902	585.34	Chronic Kidney Disease Stage IV	genitourinary
779	165.1	-0.144186	-2.20533	1.91696	0.890944	1	0	0.890944	-0.13711	0.0197693	165.1	Cancer of bronchus; lung	neoplasms
780	427.61	0.197205	-1.61943	2.01384	0.831508	1	0	0.831508	0.212768	0.0419588	427.61	Supraventricular premature beats	circulatory system
781	369.2	-0.235998	-2.40502	1.93303	0.831128	1	0	0.831128	-0.213255	0.0503276	369.2	Eye infection viral	sense organs
782	337	-0.261636	-2.6563	2.13302	0.830433	1	0	0.830433	-0.214146	0.0560284	337	Disorders of the autonomic nervous system	neurological
783	594.3	-0.142648	-1.48844	1.20314	0.835422	1	0	0.835422	-0.207753	0.0296356	594.3	Calculus of ureter	genitourinary
784	195	0.0791369	-0.402403	0.560677	0.74737	1	0	0.74737	0.322109	0.0254907	195	Cancer suspected or other	neoplasms
785	286.7	-0.189014	-1.90183	1.5238	0.828761	1	0	0.828761	-0.216291	0.0408821	286.7	Other and unspecified coagulation defects	hematopoietic
786	801.1	-0.200813	-2.01647	1.61484	0.828382	1	0	0.828382	-0.216777	0.0435315	801.1	Fracture of foot	injuries & poisonings
787	130	-0.216668	-2.1633	1.72997	0.827308	1	0	0.827308	-0.218155	0.0472672	130	Spirochetal infection	infectious diseases
788	272.9	-0.164228	-1.85879	1.53034	0.849347	1	0	0.849347	-0.189952	0.0311954	272.9	Unspecified disorder of lipoid metabolism	endocrine/metabolic
789	614.54	-0.309039	-3.08106	2.46299	0.827032	1	0	0.827032	-0.21851	0.067528	614.54	Abscess or ulceration of vulva	genitourinary
790	242.1	-0.133792	-1.12438	0.856792	0.791221	1	0	0.791221	-0.264725	0.0354182	242.1	Graves' disease	endocrine/metabolic
791	442	0.174701	-1.39073	1.74013	0.826856	1	0	0.826856	0.218736	0.0382134	442	Other aneurysm	circulatory system
792	277.7	-0.211945	-2.10333	1.67944	0.826156	1	0	0.826156	-0.219634	0.0465504	277.7	Dysmetabolic syndrome X	endocrine/metabolic
793	195.1	0.158076	-1.24447	1.56062	0.825166	1	0	0.825166	0.220905	0.0349199	195.1	Malignant neoplasm other	neoplasms
794	291.4	-0.210932	-2.08226	1.66039	0.825149	1	0	0.825149	-0.220928	0.0466008	291.4	Specific nonpsychotic mental disorders due to brain damage	mental disorders
795	255.2	-0.291329	-2.84997	2.26731	0.823405	1	0	0.823405	-0.223167	0.0650151	255.2	Adrenal hypofunction	endocrine/metabolic
796	696.41	-0.164442	-2.71165	2.38276	0.899309	1	0	0.899309	-0.126534	0.0208075	696.41	Psoriasis vulgaris	dermatologic
797	620	-0.294605	-2.84848	2.25927	0.821125	1	0	0.821125	-0.226098	0.0666095	620	Dysplasia of female genital organs	genitourinary
798	165	-0.0843639	-0.577634	0.408906	0.73746	1	0	0.73746	-0.335219	0.0282804	165	Cancer within the respiratory system	neoplasms
799	292.11	0.27405	-2.07583	2.62393	0.819195	1	0	0.819195	0.228581	0.0626425	292.11	Aphasia	mental disorders
800	502	-0.0519255	-0.258707	0.154856	0.622591	1	0	0.622591	-0.492182	0.0255568	502	Postinflammatory pulmonary fibrosis	respiratory
801	191	-0.286509	-2.73977	2.16675	0.818945	1	0	0.818945	-0.228903	0.0655827	191	Manlignant and unknown neoplasms of brain and nervous system	neoplasms
802	394.7	-0.0142686	-0.0338963	0.00535913	0.154202	1	0	0.154202	-1.42484	0.0203305	394.7	Disease of tricuspid valve	circulatory system
803	742.8	-0.190087	-1.91552	1.53535	0.829044	1	0	0.829044	-0.215928	0.0410451	742.8	Articular cartilage disorder	musculoskeletal
804	448	-0.175173	-1.66766	1.31731	0.818057	1	0	0.818057	-0.230045	0.0402975	448	Disease of capillaries	circulatory system
805	726.2	-0.144715	-1.37195	1.08252	0.81722	1	0	0.81722	-0.231122	0.0334468	726.2	Synoviopathy	musculoskeletal
806	681.3	-0.113108	-1.66699	1.44078	0.886552	1	0	0.886552	-0.142669	0.0161369	681.3	Cellulitis and abscess of arm/hand	dermatologic
807	198.1	-0.0412364	-0.288942	0.206469	0.744206	1	0	0.744206	-0.326288	0.0134549	198.1	Secondary malignancy of lymph nodes	neoplasms
808	130.1	-0.20632	-1.93968	1.52704	0.815532	1	0	0.815532	-0.233296	0.0481335	130.1	Lyme disease	infectious diseases
809	442.1	0.0647105	-0.177202	0.306623	0.600077	1	0	0.600077	0.52429	0.0339271	442.1	Aortic aneurysm	circulatory system
810	613.9	-0.180054	-1.69037	1.33026	0.815246	1	0	0.815246	-0.233664	0.042072	613.9	Breast disorder NOS	genitourinary
811	610.2	-0.201284	-1.88492	1.48235	0.814732	1	0	0.814732	-0.234325	0.0471661	610.2	Fibroadenosis of breast	genitourinary
812	389.2	-0.192316	-2.1025	1.71786	0.843568	1	0	0.843568	-0.197332	0.0379502	389.2	Conductive hearing loss	sense organs
813	279.7	-0.254989	-2.37637	1.8664	0.813751	1	0	0.813751	-0.23559	0.0600728	279.7	Other immunological findings	endocrine/metabolic
814	755.1	-0.212101	-1.97497	1.55077	0.813573	1	0	0.813573	-0.235819	0.0500175	755.1	Congenital deformities of feet	congenital anomalies
815	695.9	-0.149097	-1.56028	1.26208	0.835946	1	0	0.835946	-0.207082	0.0308753	695.9	Unspecified erythematous condition	dermatologic
816	743.21	-0.0215288	-0.0501303	0.0070727	0.140126	1	0	0.140126	-1.47532	0.031762	743.21	Pathologic fracture of vertebrae	musculoskeletal
817	557.1	-0.0981863	-0.863194	0.666821	0.801381	1	0	0.801381	-0.25156	0.0246997	557.1	Celiac disease	digestive
818	696.4	-0.158593	-2.51549	2.19831	0.895075	1	0	0.895075	-0.131886	0.0209161	696.4	Psoriasis	dermatologic
819	255.21	-0.263305	-3.49756	2.97095	0.873223	1	0	0.873223	-0.159566	0.0420144	255.21	Glucocorticoid deficiency	endocrine/metabolic
820	530.3	0.00651722	0.00293974	0.0100947	0.00035616	1	0	0.00035616	3.5706	0.0232704	530.3	Stricture and stenosis of esophagus	digestive
821	512.3	-0.268815	-2.4471	1.90947	0.808875	1	0	0.808875	-0.241877	0.0650201	512.3	Abnormal chest sounds	respiratory
822	691	-0.179678	-1.63174	1.27239	0.80837	1	0	0.80837	-0.242529	0.0435771	691	Congenital anomalies of skin	dermatologic
823	70.9	-0.206579	-2.50576	2.0926	0.860212	1	0	0.860212	-0.176104	0.0363793	70.9	Hepatitis NOS	infectious diseases
824	279.8	-0.234009	-2.09714	1.62912	0.805546	1	0	0.805546	-0.246176	0.0576075	279.8	Other specified disorders involving the immune mechanism	endocrine/metabolic
825	701.4	-0.211677	-1.89337	1.47002	0.805135	1	0	0.805135	-0.246707	0.0522221	701.4	Keloid scar	dermatologic
826	189	-0.000528025	-0.000549292	-0.000506757	0	1	0	5e-302	-37.1465	0.0196143	189	Cancer of urinary organs (incl. kidney and bladder)	neoplasms
827	370.31	0.217831	-1.49347	1.92913	0.802983	1	0	0.802983	0.249488	0.0543462	370.31	Keratoconjunctivitis sicca	sense organs
828	41.1	-0.172351	-1.52451	1.17981	0.802719	1	0	0.802719	-0.249829	0.0430585	41.1	Staphylococcus infections	infectious diseases
829	701.5	-0.155567	-1.2028	0.891663	0.770929	1	0	0.770929	-0.29116	0.0452948	701.5	Abnormal granulation tissue	dermatologic
830	447.7	0.189358	-1.27732	1.65604	0.800231	1	0	0.800231	0.253048	0.0479166	447.7	Aortic ectasia	circulatory system
831	575.6	-0.257289	-2.24842	1.73384	0.800062	1	0	0.800062	-0.253267	0.0651628	575.6	Cholesterolosis of gallbladder	digestive
832	759	-0.271054	-2.35819	1.81608	0.799076	1	0	0.799076	-0.254543	0.0689951	759	Other and unspecified congenital anomalies	congenital anomalies
833	394.2	0.174997	-1.17105	1.52105	0.798865	1	0	0.798865	0.254816	0.0445921	394.2	Mitral valve disease	circulatory system
834	327.71	-0.106144	-0.922276	0.709988	0.798791	1	0	0.798791	-0.254912	0.0270573	327.71	Restless legs syndrome	neurological
835	732	-0.257118	-2.23268	1.71845	0.798651	1	0	0.798651	-0.255093	0.065589	732	Osteochondropathies	musculoskeletal
836	711	-0.240348	-2.07615	1.59546	0.797481	1	0	0.797481	-0.256608	0.0616753	711	Arthropathy associated with infections	musculoskeletal
837	498	-0.170627	-1.47144	1.13018	0.797106	1	0	0.797106	-0.257094	0.0438673	498	Acute bronchospasm	respiratory
838	1014	-0.241577	-2.07462	1.59147	0.796169	1	0	0.796169	-0.258309	0.0624015	1014	Effects of heat cold and air pressure
839	384	-0.233315	-2.00276	1.53613	0.796066	1	0	0.796066	-0.258441	0.0602982	384	Other disorders of tympanic membrane	sense organs
840	428.2	-0.0897956	-1.07814	0.898546	0.858664	1	0	0.858664	-0.178075	0.0159904	428.2	Heart failure NOS	circulatory system
841	174.3	-0.25351	-2.14007	1.63305	0.792258	1	0	0.792258	-0.263379	0.0667692	174.3	Neoplasm of uncertain behavior of breast	neoplasms
842	480.1	-0.0107283	-0.0195087	-0.00194789	0.0166286	1	0	0.0166286	-2.39482	0.0256923	480.1	Bacterial pneumonia	respiratory
843	132	-0.255817	-2.11931	1.60768	0.78788	1	0	0.78788	-0.269065	0.0688313	132	Infestation (lice mites)	infectious diseases
844	701.1	-0.134452	-1.11346	0.844557	0.787794	1	0	0.787794	-0.269177	0.0361914	701.1	Keratoderma acquired	dermatologic
845	804	-0.104389	-0.861023	0.652245	0.786844	1	0	0.786844	-0.270411	0.028228	804	Fracture of hand or wrist	injuries & poisonings
846	315	-0.166043	-1.45383	1.12174	0.800487	1	0	0.800487	-0.252717	0.0419621	315	Develomental delays and disorders	mental disorders
847	198	-0.128609	-1.05303	0.795816	0.785099	1	0	0.785099	-0.272681	0.0350691	198	Secondary malignant neoplasm	neoplasms
848	217.1	0.044642	-0.154331	0.243615	0.660119	1	0	0.660119	0.439749	0.0196313	217.1	Nevus non-neoplastic	neoplasms
849	202.2	-0.0101176	-0.0172349	-0.00300041	0.00533177	1	0	0.00533177	-2.78627	0.0281905	202.2	Non-Hodgkins lymphoma	neoplasms
850	8.6	-0.175123	-1.41944	1.06919	0.782665	1	0	0.782665	-0.275848	0.0483074	8.6	Viral Enteritis	infectious diseases
851	446.9	-0.209677	-2.06786	1.64851	0.824964	1	0	0.824964	-0.221165	0.0463732	446.9	Arteritis NOS	circulatory system
852	513.31	-0.223444	-1.76971	1.32282	0.776999	1	0	0.776999	-0.283232	0.0632863	513.31	Apnea	respiratory
853	172.3	0.043361	-0.0922794	0.179001	0.530944	1	0	0.530944	0.626565	0.0271685	172.3	Carcinoma in situ of skin	neoplasms
854	618.5	-0.229112	-2.60309	2.14487	0.849968	1	0	0.849968	-0.189159	0.0433387	618.5	Prolapse of vaginal vault after hysterectomy	genitourinary
855	535.1	-0.192737	-2.59233	2.20685	0.874907	1	0	0.874907	-0.157429	0.0303425	535.1	Acute gastritis	digestive
856	574.2	-0.184979	-1.44425	1.07429	0.773415	1	0	0.773415	-0.287911	0.0532574	574.2	Calculus of bile duct	digestive
857	286.8	-0.161173	-1.25349	0.931145	0.772428	1	0	0.772428	-0.2892	0.0466112	286.8	Hypercoagulable state	hematopoietic
858	430	0.202496	-1.15212	1.55711	0.769528	1	0	0.769528	0.292992	0.0593297	430	Intracranial hemorrhage	circulatory system
859	286.81	-0.160821	-1.21863	0.896985	0.765715	1	0	0.765715	-0.297984	0.047922	286.81	Primary hypercoagulable state	hematopoietic
860	580	-0.175555	-1.31619	0.965079	0.762909	1	0	0.762909	-0.301663	0.0529585	580	Nephritis; nephrosis; renal sclerosis	genitourinary
861	352	-0.11932	-0.890297	0.651657	0.761632	1	0	0.761632	-0.303338	0.0361942	352	Disorders of other cranial nerves	neurological
862	850	-0.0951096	-1.14066	0.950441	0.858493	1	0	0.858493	-0.178293	0.0169574	850	Hemorrhage or hematoma complicating a procedure	injuries & poisonings
863	370.2	-0.186326	-1.36735	0.994695	0.757151	1	0	0.757151	-0.309224	0.0576166	370.2	Superficial keratitis	sense organs
864	907	-0.0917943	-0.592621	0.409032	0.719415	1	0	0.719415	-0.35924	0.0329762	907	Injuries to the nervous system	injuries & poisonings
865	618.2	0.108229	-0.563365	0.779824	0.752109	1	0	0.752109	0.31586	0.0341853	618.2	Uterine/Uterovaginal prolapse	genitourinary
866	385	-0.213189	-1.52585	1.09947	0.750239	1	0	0.750239	-0.318324	0.0678633	385	Other disorders of middle ear and mastoid	sense organs
867	370.3	0.152079	-0.78295	1.08711	0.749888	1	0	0.749888	0.318787	0.0484808	370.3	Keratoconjunctivitis	sense organs
868	327.6	-0.203822	-1.45589	1.04825	0.749677	1	0	0.749677	-0.319065	0.0650325	327.6	Circadian rhythm sleep disorder	neurological
869	275.51	-0.157934	-1.1241	0.808228	0.748672	1	0	0.748672	-0.320391	0.0506005	275.51	Hypocalcemia	endocrine/metabolic
870	202	-0.143444	-1.53967	1.25278	0.840414	1	0	0.840414	-0.201365	0.0288846	202	Cancer of other lymphoid histiocytic tissue	neoplasms
871	217	0.0650034	-0.331186	0.461193	0.747771	1	0	0.747771	0.32158	0.0209038	217	Vascular hamartomas and non-neoplastic nevi	neoplasms
872	229	-0.059486	-0.352316	0.233344	0.690514	1	0	0.690514	-0.398158	0.0236848	229	Benign neoplasm of unspecified sites	neoplasms
873	377.1	-0.154536	-1.08429	0.775217	0.744594	1	0	0.744594	-0.325776	0.0503441	377.1	Optic atrophy	sense organs
874	451	-0.155706	-1.60153	1.29012	0.832825	1	0	0.832825	-0.211079	0.0328663	451	Phlebitis and thrombophlebitis	circulatory system
875	374.1	0.0912194	-0.412165	0.594603	0.722457	1	0	0.722457	0.355176	0.032399	374.1	Ectropion or entropion	sense organs
876	733.2	-0.169665	-1.46015	1.12082	0.796647	1	0	0.796647	-0.257689	0.0437209	733.2	Cyst of bone	musculoskeletal
877	480.11	-0.107582	-1.85115	1.63599	0.903741	1	0	0.903741	-0.120937	0.0130107	480.11	Pneumococcal pneumonia	respiratory
878	529	-0.0521257	-0.238569	0.134318	0.583709	1	0	0.583709	-0.547976	0.0285636	529	Diseases and other conditions of the tongue	digestive
879	352.1	-0.128759	-1.07762	0.8201	0.790263	1	0	0.790263	-0.26597	0.034246	352.1	Trigeminal nerve disorders [CN5]	neurological
880	555.1	-0.132252	-1.33615	1.07165	0.829524	1	0	0.829524	-0.215312	0.0284753	555.1	Regional enteritis	digestive
881	374.3	0.0311161	-0.0611309	0.123363	0.508527	1	0	0.508527	0.661133	0.0205719	374.3	Ptosis of eyelid	sense organs
882	728.71	0.0243797	-0.0225491	0.0713085	0.30857	1	0	0.30857	1.01823	0.0248241	728.71	Contracture of palmar fascia [Dupuytren's disease]	musculoskeletal
883	740.3	0.115085	-0.53803	0.768199	0.729816	1	0	0.729816	0.34537	0.0397469	740.3	Osteoarthrosis involving more than one site but not specified as generalized	musculoskeletal
884	938.2	-0.0632131	-0.421634	0.295207	0.729585	1	0	0.729585	-0.345677	0.0218513	938.2	Chronic dermatitis due to solar radiation	dermatologic
885	281.9	0.169612	-0.780681	1.11991	0.726467	1	0	0.726467	0.349828	0.0593351	281.9	Deficiency anemias	hematopoietic
886	228	0.0353354	-0.118246	0.188917	0.652026	1	0	0.652026	0.450949	0.0159345	228	Hemangioma and lymphangioma any site	neoplasms
887	451.2	-0.104978	-1.20664	0.996683	0.851841	1	0	0.851841	-0.186771	0.0196069	451.2	Phlebitis and thrombophlebitis of lower extremities	circulatory system
888	610.3	-0.1226	-0.77797	0.53277	0.713875	1	0	0.713875	-0.366657	0.0449521	610.3	Fibrosclerosis of breast	genitourinary
889	871.4	-0.196334	-1.28317	0.890498	0.723286	1	0	0.723286	-0.35407	0.069516	871.4	Open wound of toe(s)	injuries & poisonings
890	859	-0.122907	-0.801551	0.555737	0.722613	1	0	0.722613	-0.354969	0.0436282	859	Complication due to other implant and internal device	injuries & poisonings
891	735.23	-0.0740373	-0.509088	0.361013	0.738716	1	0	0.738716	-0.333555	0.0246955	735.23	Hallux rigidus	musculoskeletal
892	870.3	0.0237098	-0.0329023	0.0803218	0.41172	1	0	0.41172	0.820871	0.0194627	870.3	Other open wound of head and face	injuries & poisonings
893	275.1	-0.0977616	-0.562341	0.366818	0.680015	1	0	0.680015	-0.412443	0.0403211	275.1	Disorders of iron metabolism	hematopoietic
894	573.7	-0.0911437	-0.58745	0.405162	0.71889	1	0	0.71889	-0.359943	0.0328065	573.7	Abnormal results of function study of liver	digestive
895	427.12	0.0623244	-0.152839	0.277488	0.570215	1	0	0.570215	0.567734	0.0353837	427.12	Paroxysmal ventricular tachycardia	circulatory system
896	963.1	-0.131333	-0.840735	0.578068	0.71671	1	0	0.71671	-0.362859	0.0476555	963.1	Antineoplastic and immunosuppressive drugs causing adverse effects	injuries & poisonings
897	228.1	0.053951	-0.236275	0.344177	0.715596	1	0	0.715596	0.36435	0.0196571	228.1	Hemangioma of skin and subcutaneous tissue	neoplasms
898	279.1	-0.104523	-0.66666	0.457614	0.715529	1	0	0.715529	-0.364441	0.0380925	279.1	Immunity deficiency	endocrine/metabolic
899	962	-0.164979	-1.0479	0.717945	0.714189	1	0	0.714189	-0.366236	0.0604212	962	Poisoning by hormones and synthetic substitutes	injuries & poisonings
900	364.1	-0.177645	-1.11635	0.761065	0.710699	1	0	0.710699	-0.370918	0.0658916	364.1	Corneal opacity	sense organs
901	295.3	-0.171954	-1.07255	0.728646	0.708235	1	0	0.708235	-0.374228	0.0643499	295.3	Psychosis	mental disorders
902	696.42	-0.228047	-2.88576	2.42966	0.866442	1	0	0.866442	-0.168179	0.0383529	696.42	Psoriatic arthropathy	dermatologic
903	579.2	-0.176575	-1.57282	1.21967	0.804235	1	0	0.804235	-0.24787	0.0437677	579.2	Splenomegaly	digestive
904	53.1	0.159127	-0.666803	0.985058	0.705711	1	0	0.705711	0.377622	0.06009	53.1	Herpes zoster with nervous system complications	infectious diseases
905	210	-0.0964771	-0.596855	0.403901	0.705502	1	0	0.705502	-0.377904	0.0364591	210	Benign neoplasm of lip oral cavity and pharynx	neoplasms
906	711.1	-0.181774	-1.11336	0.749809	0.702133	1	0	0.702133	-0.382443	0.0695181	711.1	Pyogenic arthritis	musculoskeletal
907	527.2	-0.149079	-1.19687	0.898714	0.780347	1	0	0.780347	-0.278867	0.0415734	527.2	Sialoadenitis	digestive
908	550.6	-0.125308	-0.76155	0.510934	0.69948	1	0	0.69948	-0.386022	0.0483717	550.6	Incisional hernia	digestive
909	840.1	-0.170665	-1.03513	0.693804	0.698795	1	0	0.698795	-0.386947	0.0660385	840.1	Muscle/tendon sprain	injuries & poisonings
910	624.1	-0.0107161	-0.0169169	-0.00451522	0.000706104	1	0	0.000706104	-3.3872	0.0362974	624.1	Dystrophy of female genital tract	genitourinary
911	931	-0.0943632	-0.568563	0.379837	0.696515	1	0	0.696515	-0.390029	0.0368044	931	Contact dermatitis and other eczema due to plants [except food]	dermatologic
912	736.2	-0.16972	-1.00547	0.666027	0.690609	1	0	0.690609	-0.398029	0.0675537	736.2	Acquired deformities of finger	musculoskeletal
913	743.13	0.130907	-0.506795	0.768608	0.687429	1	0	0.687429	0.402346	0.0526697	743.13	Other specified osteoporosis	musculoskeletal
914	573.6	-0.106989	-0.613917	0.399939	0.679121	1	0	0.679121	-0.413663	0.0442573	573.6	Nonspecific elevation of levels of transaminase or lactic acid dehydrogenase [LDH]	digestive
915	535.6	-0.132737	-0.759456	0.493982	0.678053	1	0	0.678053	-0.415122	0.0551021	535.6	Duodenitis	digestive
916	244.2	0.0588467	-0.216308	0.334001	0.675084	1	0	0.675084	0.419181	0.0246674	244.2	Acquired hypothyroidism	endocrine/metabolic
917	471	-0.0438523	-0.177132	0.0894278	0.519001	1	0	0.519001	-0.644887	0.0282798	471	Nasal polyps	respiratory
918	153.2	0.0485976	-0.194647	0.291842	0.695363	1	0	0.695363	0.391587	0.0190302	153.2	Colon cancer	neoplasms
919	377.3	0.116376	-0.418127	0.65088	0.669564	1	0	0.669564	0.426746	0.0496631	377.3	Optic neuritis/neuropathy	sense organs
920	514.1	0.123893	-0.44251	0.690296	0.668125	1	0	0.668125	0.428723	0.0531157	514.1	Abnormal results of function study of pulmonary system	respiratory
921	246.7	-0.0763025	-0.421468	0.268863	0.664812	1	0	0.664812	-0.433279	0.0330602	246.7	Abnormal results of function study of thyroid	endocrine/metabolic
922	560.2	0.00602864	0.0043114	0.00774589	5.94902e-12	1	0	5.94902e-12	6.88087	0.0414823	560.2	Impaction of intestine	digestive
923	433.5	-0.0700905	-0.312326	0.172145	0.570631	1	0	0.570631	-0.567122	0.0397499	433.5	Cerebral aneurysm	circulatory system
924	747.11	-0.155513	-1.42662	1.1156	0.810489	1	0	0.810489	-0.239795	0.0372914	747.11	Cardiac shunt/ heart septal defect	congenital anomalies
925	506	-0.0121804	-0.0217393	-0.00262146	0.0125067	1	0	0.0125067	-2.49752	0.0304207	506	Empyema and pneumothorax	respiratory
926	577.1	-0.119976	-0.646598	0.406646	0.655214	1	0	0.655214	-0.446531	0.053573	577.1	Acute pancreatitis	digestive
927	780	-0.102728	-0.551155	0.345699	0.653426	1	0	0.653426	-0.449008	0.0461258	780	Hypothermia/Chills	symptoms
928	342	-0.176651	-2.51941	2.16611	0.882508	1	0	0.882508	-0.14779	0.0261073	342	Hemiplegia	neurological
929	350.6	-0.100104	-0.533458	0.333251	0.650726	1	0	0.650726	-0.452754	0.0453223	350.6	Disturbances of sensation of smell and taste	neurological
930	555	-0.0882006	-0.468822	0.29242	0.649694	1	0	0.649694	-0.454187	0.0400596	555	Inflammatory bowel disease and other gastroenteritis and colitis	digestive
931	807	-0.0271476	-0.0835425	0.0292472	0.345418	1	0	0.345418	-0.943515	0.0256142	807	Fracture of ribs	injuries & poisonings
932	446	-0.117417	-0.623265	0.38843	0.649141	1	0	0.649141	-0.454956	0.0534197	446	Polyarteritis nodosa and allied conditions	circulatory system
933	800.2	-0.0135752	-0.026563	-0.000587376	0.0404972	1	0	0.0404972	-2.04864	0.0278107	800.2	Fracture of unspecified part of femur	injuries & poisonings
934	352.2	-0.107685	-0.787493	0.572124	0.756201	1	0	0.756201	-0.310473	0.0334333	352.2	Facial nerve disorders [CN7]	neurological
935	274.11	0.135828	-0.446916	0.718572	0.647784	1	0	0.647784	0.456842	0.0620518	274.11	Gouty arthropathy	endocrine/metabolic
936	749	-0.149676	-0.787459	0.488107	0.645533	1	0	0.645533	-0.459977	0.0688476	749	Congenital anomalies of face and neck	congenital anomalies
937	182	0.248984	-5.79678	6.29474	0.935665	1	0	0.935665	0.0807192	0.0200978	182	Malignant neoplasm of uterus	neoplasms
938	184	-0.0844399	-0.43762	0.26874	0.639351	1	0	0.639351	-0.468606	0.039569	184	Cancer of other female genital organs	neoplasms
939	495.1	-0.122636	-0.630731	0.38546	0.636162	1	0	0.636162	-0.473072	0.0580155	495.1	Chronic obstructive asthma	respiratory
940	800.3	-0.059771	-0.352822	0.23328	0.689331	1	0	0.689331	-0.399763	0.0238942	800.3	Fracture of tibia and fibula	injuries & poisonings
941	747.1	-0.085021	-0.434799	0.264757	0.633776	1	0	0.633776	-0.476419	0.0405056	747.1	Cardiac congenital anomalies	congenital anomalies
942	275.53	-0.128072	-0.654179	0.398035	0.63327	1	0	0.63327	-0.47713	0.0611069	275.53	Disorders of phosphorus metabolism	endocrine/metabolic
943	751.21	0.114191	-0.354541	0.582923	0.633014	1	0	0.633014	0.477489	0.0545248	751.21	Cystic kidney disease	congenital anomalies
944	441	-0.0701279	-0.307043	0.166787	0.561802	1	0	0.561802	-0.580168	0.0406859	441	Vascular insufficiency of intestine	circulatory system
945	290.3	-0.108457	-0.551007	0.334093	0.630984	1	0	0.630984	-0.480342	0.0520964	290.3	Other persistent mental disorders due to conditions classified elsewhere	mental disorders
946	747	-0.0751085	-0.380737	0.23052	0.630039	1	0	0.630039	-0.481672	0.0361777	747	Cardiac and circulatory congenital anomalies	congenital anomalies
947	701.3	0.0847097	-0.25888	0.4283	0.628937	1	0	0.628937	0.483224	0.0409338	701.3	Circumscribed scleroderma	dermatologic
948	809	-0.0792035	-0.399912	0.241505	0.628351	1	0	0.628351	-0.484049	0.0383384	809	Fracture of unspecified bones	injuries & poisonings
949	819	-0.0475662	-0.243359	0.148227	0.633957	1	0	0.633957	-0.476165	0.0226494	819	Skull and face fracture and other intercranial injury	injuries & poisonings
950	41.12	-0.119436	-0.602183	0.36331	0.62773	1	0	0.62773	-0.484924	0.0579176	41.12	Methicillin resistant Staphylococcus aureus	infectious diseases
951	721.2	0.0989951	-0.298995	0.496985	0.625886	1	0	0.625886	0.487526	0.0482627	721.2	Spondylosis with myelopathy	musculoskeletal
952	333.4	-0.11214	-0.562153	0.337873	0.625254	1	0	0.625254	-0.488418	0.0547711	333.4	Torsion dystonia	neurological
953	963	-0.0922118	-0.456171	0.271747	0.619485	1	0	0.619485	-0.496581	0.0457906	963	Poisoning by primarily systemic agents	injuries & poisonings
954	371.1	-0.0605218	-0.250117	0.129074	0.531537	1	0	0.531537	-0.625661	0.0378661	371.1	Uveitis noninfectious or NOS	sense organs
955	960.1	-0.0799206	-0.38874	0.228899	0.611989	1	0	0.611989	-0.507236	0.0405386	960.1	Adverse effects of antibacterials (not penicillins)	injuries & poisonings
956	572	-0.0207627	-0.0570007	0.0154752	0.261441	1	0	0.261441	-1.12299	0.0233164	572	Ascites (non malignant)	digestive
957	153	0.0881724	-0.252095	0.42844	0.611532	1	0	0.611532	0.507888	0.0447817	153	Colorectal cancer	neoplasms
958	117	-0.122256	-0.593429	0.348918	0.611059	1	0	0.611059	-0.508562	0.0621746	117	Mycoses	infectious diseases
959	349	-0.136934	-1.05775	0.783879	0.770691	1	0	0.770691	-0.291471	0.0399123	349	Other and unspecified disorders of the nervous system	neurological
960	516.1	-0.170645	-2.21634	1.87505	0.870128	1	0	0.870128	-0.163497	0.0278999	516.1	Hemoptysis	respiratory
961	292.5	-0.12776	-0.602408	0.346888	0.597798	1	0	0.597798	-0.527569	0.0674023	292.5	Transient alteration of awareness	mental disorders
962	516	-0.103224	-0.485667	0.279219	0.596792	1	0	0.596792	-0.529019	0.0546076	516	Abnormal sputum	respiratory
963	704.12	-0.127304	-0.598568	0.34396	0.596486	1	0	0.596486	-0.52946	0.0674023	704.12	Telogen effluvium	dermatologic
964	980	-0.0923677	-0.433994	0.249259	0.596156	1	0	0.596156	-0.529937	0.048949	980	Encounter for long-term (current) use of antibiotics	infectious diseases
965	368.4	0.0209871	-0.00547322	0.0474475	0.120046	1	0	0.120046	1.55458	0.0326262	368.4	Visual field defects	sense organs
966	459.1	0.0952983	-0.255975	0.446572	0.594909	1	0	0.594909	0.531736	0.0506735	459.1	Hemorrhage NOS	circulatory system
967	588.2	0.127744	-0.342377	0.597865	0.594323	1	0	0.594323	0.532582	0.0680341	588.2	Secondary hyperparathyroidism (of renal origin)	genitourinary
968	740.12	-0.0832375	-0.389167	0.222692	0.593841	1	0	0.593841	-0.533278	0.0443887	740.12	Osteoarthrosis localized secondary	musculoskeletal
969	503	-0.00399418	-0.00479499	-0.00319337	0	1	0	5e-302	-37.1465	0.14837	503	Pulmonary congestion and hypostasis	respiratory
970	260.6	-0.0850999	-0.627078	0.456879	0.75827	1	0	0.75827	-0.307753	0.0261898	260.6	Anorexia	endocrine/metabolic
971	977	0.105394	-0.259519	0.470307	0.571335	1	0	0.571335	0.566087	0.0596622	977	Personal history of allergy to medicinal agents	injuries & poisonings
972	911	-0.121354	-0.53958	0.296871	0.569543	1	0	0.569543	-0.568724	0.0690172	911	Blister	injuries & poisonings
973	350.3	0.0359825	-0.0430608	0.115026	0.372264	1	0	0.372264	0.892241	0.032105	350.3	Lack of coordination	neurological
974	555.2	-0.0535552	-0.295298	0.188187	0.664133	1	0	0.664133	-0.434215	0.0232544	555.2	Ulcerative colitis	digestive
975	300.13	-0.125859	-1.25574	1.00402	0.827173	1	0	0.827173	-0.218329	0.0274787	300.13	Phobia	mental disorders
976	458.2	0.104613	-0.245068	0.454294	0.557629	1	0	0.557629	0.586367	0.0613416	458.2	Iatrogenic hypotension	circulatory system
977	225.1	0.00464315	0.00324781	0.00603848	6.93103e-11	1	0	6.93103e-11	6.52214	0.0302833	225.1	Benign neoplasm of brain cranial nerves meninges	neoplasms
978	374.6	0.0551046	-0.127382	0.237591	0.55395	1	0	0.55395	0.591852	0.0326138	374.6	Dermatochalasis	sense organs
979	737.1	0.000838039	0.000801966	0.000874111	0	1	0	5e-302	37.1465	0.0311302	737.1	Kyphosis (acquired)	musculoskeletal
980	225	0.0853505	-0.19677	0.367471	0.553206	1	0	0.553206	0.592962	0.0506096	225	Benign neoplasm of brain and other parts of nervous system	neoplasms
981	560.1	-0.12499	-0.919416	0.669437	0.757798	1	0	0.757798	-0.308373	0.0385434	560.1	Paralytic ileus	digestive
982	709.2	-0.123173	-1.22898	0.982631	0.82718	1	0	0.82718	-0.21832	0.026891	709.2	Sicca syndrome	dermatologic
983	184.1	-0.0857173	-0.366603	0.195169	0.549754	1	0	0.549754	-0.598129	0.05127	184.1	Malignant neoplasm of ovary and other uterine adnexa	neoplasms
984	227	-0.078291	-0.334303	0.177721	0.548915	1	0	0.548915	-0.599387	0.0469266	227	Benign neoplasm of other endocrine glands and related structures	neoplasms
985	803.1	-0.0295799	-0.112852	0.053692	0.486283	1	0	0.486283	-0.696232	0.0205945	803.1	Fracture of humerus	injuries & poisonings
986	359	-0.0889648	-0.374734	0.196805	0.541742	1	0	0.541742	-0.610181	0.0542847	359	Muscular dystrophies and other myopathies	neurological
987	200	-0.0137578	-0.0253736	-0.00214209	0.0202626	1	0	0.0202626	-2.32145	0.0319381	200	Myeloproliferative disease	neoplasms
988	41.4	0.0845327	-0.183566	0.352631	0.536578	1	0	0.536578	0.617996	0.0522409	41.4	E. coli	infectious diseases
989	687.3	-0.0858966	-0.356592	0.184799	0.533979	1	0	0.533979	-0.621943	0.0534228	687.3	Changes in skin texture	dermatologic
990	473.3	0.0928778	-0.199527	0.385282	0.533571	1	0	0.533571	0.622564	0.0578224	473.3	Paralysis/spasm of vocal cords or larynx	respiratory
991	204	-0.0389309	-0.109204	0.0313419	0.277553	1	0	0.277553	-1.08583	0.0422724	204	Leukemia	neoplasms
992	281.11	-0.19871	-2.52002	2.1226	0.866756	1	0	0.866756	-0.167781	0.0333396	281.11	Pernicious anemia	hematopoietic
993	289.3	-0.0205477	-0.043798	0.00270257	0.0832427	1	0	0.0832427	-1.73217	0.0355923	289.3	Personal history of diseases of blood and blood-forming organs	hematopoietic
994	707.3	-0.0819766	-0.33548	0.171527	0.526202	1	0	0.526202	-0.633815	0.051958	707.3	Chronic ulcer of unspecified site	dermatologic
995	743.4	-0.0788552	-0.316566	0.158856	0.515572	1	0	0.515572	-0.650186	0.0512705	743.4	Stress fracture	musculoskeletal
996	420.3	-0.0537246	-0.217129	0.109679	0.519305	1	0	0.519305	-0.644416	0.034621	420.3	Endocarditis	circulatory system
997	681.6	-0.102095	-1.28021	1.07602	0.865127	1	0	0.865127	-0.169852	0.017341	681.6	Cellulitis and abscess of foot toe	dermatologic
998	722.7	-0.0919795	-0.358669	0.17471	0.499046	1	0	0.499046	-0.675991	0.0621774	722.7	Intervertebral disc disorder with myelopathy	musculoskeletal
999	567	-0.054408	-0.230061	0.121245	0.543781	1	0	0.543781	-0.607105	0.0330314	567	Peritonitis and retroperitoneal infections	digestive
1000	707.2	0.0649331	-0.116835	0.246701	0.483821	1	0	0.483821	0.700171	0.0454643	707.2	Chronic ulcer of leg or foot	dermatologic
1001	575.8	-0.0970729	-0.867558	0.673412	0.804955	1	0	0.804955	-0.246939	0.0239711	575.8	Other disorders of biliary tract	digestive
1002	350.5	-0.095721	-0.362763	0.171321	0.48233	1	0	0.48233	-0.702561	0.0672498	350.5	Abnormal reflex	neurological
1003	378	-0.0571025	-0.21525	0.101045	0.479133	1	0	0.479133	-0.707698	0.0404114	378	Strabismus and other disorders of binocular eye movements	sense organs
1004	227.1	0.0940525	-0.165533	0.353638	0.477614	1	0	0.477614	0.710145	0.0667909	227.1	Benign neoplasm of adrenal gland	neoplasms
1005	193	-0.0160372	-0.0289516	-0.0031228	0.0149353	1	0	0.0149353	-2.43394	0.0390336	193	Thyroid cancer	neoplasms
1006	286.9	0.0611839	-0.106493	0.22886	0.474492	1	0	0.474492	0.71519	0.0437581	286.9	Abnormal coagulation profile	hematopoietic
1007	751	-0.0554629	-0.204659	0.0937328	0.466233	1	0	0.466233	-0.728622	0.0404115	751	Genitourinary congenital anomalies	congenital anomalies
1008	184.11	0.00631337	0.00319702	0.00942973	7.16525e-05	1	0	7.16525e-05	3.97073	0.0250687	184.11	Malignant neoplasm of ovary	neoplasms
1009	589	0.0693668	-0.1165	0.255233	0.464482	1	0	0.464482	0.731487	0.0507409	589	Abnormal results of function study of kidney	genitourinary
1010	281.12	0.0677393	-0.112444	0.247923	0.46121	1	0	0.46121	0.736855	0.049914	281.12	Other vitamin B12 deficiency anemia	hematopoietic
1011	359.2	-0.0751687	-0.273039	0.122702	0.456525	1	0	0.456525	-0.744581	0.0559691	359.2	Myopathy	neurological
1012	754.2	0.0788869	-0.12774	0.285513	0.45428	1	0	0.45428	0.748298	0.0590309	754.2	Spondylolisthesis congenital	congenital anomalies
1013	1019	-0.0812706	-1.3544	1.19186	0.900431	1	0	0.900431	-0.125117	0.0101683	1019	Other ill-defined and unknown causes of morbidity and mortality
1014	627.22	-0.0526598	-0.188538	0.0832186	0.447494	1	0	0.447494	-0.7596	0.0400004	627.22	Need for Hormone replacement therapy (postmenopausal)	genitourinary
1015	504	-0.0394939	-0.125694	0.046706	0.369182	1	0	0.369182	-0.898007	0.0354658	504	Other alveolar and parietoalveolar pneumonopathy	respiratory
1016	473.1	-0.0873429	-0.311211	0.136525	0.444449	1	0	0.444449	-0.764702	0.0667913	473.1	Chronic laryngitis	respiratory
1017	287.1	-0.0723523	-0.257112	0.112407	0.442759	1	0	0.442759	-0.767543	0.0555335	287.1	Spontaneous ecchymoses	hematopoietic
1018	794	-0.082502	-0.290226	0.125222	0.4363	1	0	0.4363	-0.778457	0.0642243	794	Abnormal results of other function studies (bladder pancreas placenta spleen etc)	symptoms
1019	363.3	0.0807657	-0.120378	0.281909	0.431279	1	0	0.431279	0.787004	0.063563	363.3	Chorioretinal scars	sense organs
1020	721.8	0.00740976	0.0040179	0.0108016	1.85419e-05	1	0	1.85419e-05	4.28176	0.0317268	721.8	Other allied disorders of spine	musculoskeletal
1021	573.5	0.00478428	0.00358255	0.00598602	5.9952e-15	1	0	5.9952e-15	7.80405	0.0373368	573.5	Jaundice (not of newborn)	digestive
1022	750.2	-0.0567112	-0.188816	0.0753941	0.400122	1	0	0.400122	-0.841404	0.047717	750.2	Lower gastrointestinal congenital anomalies	congenital anomalies
1023	550.1	0.00409132	0.00273979	0.00544284	2.9692e-09	1	0	2.9692e-09	5.93329	0.024275	550.1	Inguinal hernia	digestive
1024	597	-0.0607639	-0.317647	0.196119	0.642917	1	0	0.642917	-0.463625	0.0281716	597	Other disorders of urethra and urinary tract	genitourinary
1025	530.2	-0.0835849	-0.688502	0.521332	0.786526	1	0	0.786526	-0.270825	0.0226369	530.2	Esophageal bleeding (varices/hemorrhage)	digestive
1026	739	-0.0498051	-0.1834	0.0837899	0.464962	1	0	0.464962	-0.730701	0.0363927	739	Contracture of joint	musculoskeletal
1027	790.1	-0.059582	-0.188698	0.0695341	0.36575	1	0	0.36575	-0.904462	0.0538896	790.1	Elevated sedimentation rate	symptoms
1028	194	-0.0713041	-0.225487	0.0828792	0.364709	1	0	0.364709	-0.906428	0.064632	194	Cancer of other endocrine glands	neoplasms
1029	276.6	-0.0790152	-0.51906	0.361029	0.724883	1	0	0.724883	-0.351941	0.0278087	276.6	Fluid overload	endocrine/metabolic
1030	750	-0.0430836	-0.13523	0.0490622	0.359449	1	0	0.359449	-0.916416	0.0394825	750	Digestive congenital anomalies	congenital anomalies
1031	840.2	-0.0414159	-0.12778	0.0449486	0.347261	1	0	0.347261	-0.939914	0.0389274	840.2	Rotator cuff (capsule) sprain	injuries & poisonings
1032	395.4	0.00338119	0.00289054	0.00387184	0	1	0	5e-302	37.1465	0.125599	395.4	Nonrheumatic pulmonary valve disorders	circulatory system
1033	224.1	0.0484342	-0.0499691	0.146838	0.334688	1	0	0.334688	0.964714	0.0467251	224.1	Benign neoplasm of eye uveal	neoplasms
1034	279.11	-0.0547184	-0.162177	0.0527401	0.318259	1	0	0.318259	-0.998042	0.0546113	279.11	Deficiency of humoral immunity	endocrine/metabolic
1035	362.6	-0.0512873	-0.150375	0.0478002	0.31035	1	0	0.31035	-1.01449	0.0520304	362.6	Peripheral retinal degenerations	sense organs
1036	772.1	-0.0602061	-0.17646	0.056048	0.310081	1	0	0.310081	-1.01505	0.0611124	772.1	Muscular wasting and disuse atrophy	symptoms
1037	530.13	0.0442096	-0.0409884	0.129408	0.309129	1	0	0.309129	1.01705	0.0449634	530.13	Barrett's esophagus	digestive
1038	528.5	-0.0620868	-0.292185	0.168011	0.596901	1	0	0.596901	-0.528862	0.0328354	528.5	Diseases of lips	digestive
1039	854	-0.129625	-1.46148	1.20223	0.848714	1	0	0.848714	-0.19076	0.0247272	854	Complications of cardiac/vascular device implant and graft	injuries & poisonings
1040	965.1	-0.111456	-1.38315	1.16024	0.863609	1	0	0.863609	-0.171782	0.0191461	965.1	Opiates and related narcotics causing adverse effects in therapeutic use	injuries & poisonings
1041	411.1	-0.164116	-2.60972	2.28149	0.895357	1	0	0.895357	-0.131529	0.0215861	411.1	Unstable angina (intermediate coronary syndrome)	circulatory system
1042	348.8	-0.0499781	-0.136197	0.0362408	0.255896	1	0	0.255896	-1.13614	0.0567823	348.8	Encephalopathy not elsewhere classified	neurological
1043	800.4	0.0496213	-0.0349559	0.134198	0.250173	1	0	0.250173	1.14993	0.057061	800.4	Fracture of patella	injuries & poisonings
1044	990	0.0272676	-0.0180537	0.072589	0.238305	1	0	0.238305	1.17924	0.0321549	990	Effects radiation NOS	injuries & poisonings
1045	803	-0.0082865	-0.0145563	-0.00201671	0.00958521	1	0	0.00958521	-2.59044	0.0214657	803	Fracture of upper limb	injuries & poisonings
1046	378.1	-0.0281013	-0.0749634	0.0187608	0.239862	1	0	0.239862	-1.17533	0.0330283	378.1	Strabismus (not specified as paralytic)	sense organs
1047	803.2	-0.0230337	-0.0599524	0.0138849	0.221385	1	0	0.221385	-1.22285	0.0281669	803.2	Fracture of radius and ulna	injuries & poisonings
1048	961	-0.0773224	-0.49197	0.337325	0.714741	1	0	0.714741	-0.365496	0.028261	961	Poisoning by other anti-infectives	injuries & poisonings
1049	289.8	-0.0549875	-0.142294	0.0323187	0.217034	1	0	0.217034	-1.23445	0.0678796	289.8	Polycythemia secondary	hematopoietic
1050	364	-0.00296576	-0.00358949	-0.00234203	0	1	0	5e-302	-37.1465	0.110167	364	Corneal opacity and other disorders of cornea	sense organs
1051	527.7	0.0297062	-0.015532	0.0749445	0.198074	1	0	0.198074	1.28706	0.0382336	527.7	Disturbance of salivary secretion	digestive
1052	751.2	0.0357594	-0.0177634	0.0892823	0.190363	1	0	0.190363	1.30951	0.0468272	751.2	Congenital anomalies of urinary system	congenital anomalies
1053	375.2	-0.0382676	-0.128915	0.0523799	0.407993	1	0	0.407993	-0.827431	0.0316638	375.2	Epiphora	sense organs
1054	1008	-0.105	-0.691094	0.481095	0.725486	1	0	0.725486	-0.351136	0.0368692	1008	Crushing or internal injury to organs
1055	38.3	-0.0482378	-0.118801	0.022325	0.180282	1	0	0.180282	-1.33989	0.0646331	38.3	Bacteremia	infectious diseases
1056	790.8	-0.0410603	-0.101113	0.0189928	0.180207	1	0	0.180207	-1.34012	0.0550257	790.8	Elevated C-reactive protein (CRP)	symptoms
1057	593.1	0.027509	-0.011774	0.066792	0.169895	1	0	0.169895	1.37254	0.0377573	593.1	Gross hematuria	genitourinary
1058	158	0.0158867	-0.000730937	0.0325043	0.0609596	1	0	0.0609596	1.87379	0.0297683	158	Neoplasm of unspecified nature of digestive system	neoplasms
1059	595	-0.0217489	-0.0643834	0.0208855	0.317385	1	0	0.317385	-0.999846	0.0217456	595	Hydronephrosis	genitourinary
1060	529.6	-0.045567	-0.106358	0.0152236	0.141788	1	0	0.141788	-1.46916	0.0669455	529.6	Glossodynia	digestive
1061	555.21	-0.0580183	-0.211643	0.095606	0.459166	1	0	0.459166	-0.740221	0.0429464	555.21	Ulcerative colitis (chronic)	digestive
1062	224	0.0301614	-0.00976912	0.0700919	0.138745	1	0	0.138745	1.48048	0.0446533	224	Benign neoplasm of eye	neoplasms
1063	941	0.0395834	-0.0307393	0.109906	0.269919	1	0	0.269919	1.10325	0.0436704	941	Adverse reaction to serum or vaccine	injuries & poisonings
1064	420.2	-0.0406442	-0.161028	0.0797401	0.50814	1	0	0.50814	-0.661736	0.0268957	420.2	Pericarditis	circulatory system
1065	961.1	-0.0370505	-0.142348	0.0682469	0.49041	1	0	0.49041	-0.689656	0.0255521	961.1	Poisoning/allergy of sulfonamides	injuries & poisonings
1066	316.1	-0.0413051	-0.0921576	0.00954731	0.11138	1	0	0.11138	-1.59202	0.0657585	316.1	Polyneuropathy due to drugs	mental disorders
1067	365.2	0.0431343	-0.0885759	0.174844	0.520946	1	0	0.520946	0.641888	0.0276874	365.2	Primary angle-closure glaucoma	sense organs
1068	556	-0.048964	-0.167845	0.069917	0.419509	1	0	0.419509	-0.807273	0.0395274	556	Ulceration of the lower GI tract	digestive
1069	530.5	-0.0391107	-0.141128	0.0629064	0.452404	1	0	0.452404	-0.751412	0.0293882	530.5	Disorders of esophageal motility	digestive
1070	368.2	-0.0407021	-0.151708	0.0703035	0.472346	1	0	0.472346	-0.718668	0.0292513	368.2	Diplopia and disorders of binocular vision	sense organs
1071	588	0.0325053	-0.00214048	0.067151	0.0659288	1	0	0.0659288	1.83891	0.0597742	588	Disorders resulting from impaired renal function	genitourinary
1072	710.19	-0.0387419	-0.101213	0.0237295	0.224174	1	0	0.224174	-1.2155	0.0470909	710.19	Unspecified osteomyelitis	musculoskeletal
1073	733.8	-0.1026	-0.785413	0.580213	0.768366	1	0	0.768366	-0.294512	0.0302171	733.8	Malunion and nonunion of fracture	musculoskeletal
1074	710	-0.0312411	-0.064155	0.0016728	0.0628309	1	0	0.0628309	-1.86039	0.0581206	710	Osteomyelitis periostitis and other infections involving bone	musculoskeletal
1075	361	0.027902	-0.0304957	0.0862998	0.349029	1	0	0.349029	0.936474	0.0261295	361	Retinal detachments and defects	sense organs
1076	710.1	-0.0304756	-0.0604864	-0.000464677	0.0465526	1	0	0.0465526	-1.99035	0.060657	710.1	Osteomyelitis	musculoskeletal
1077	364.4	-0.00148307	-0.00164498	-0.00132115	0	1	0	5e-302	-37.1465	0.0550907	364.4	Corneal degenerations	sense organs
1078	781.2	0.0264071	0.00383236	0.0489818	0.0218632	1	0	0.0218632	2.29274	0.0605445	781.2	Abnormal posture	symptoms
1079	327.31	0.0212137	0.00354327	0.0388841	0.0186216	1	0	0.0186216	2.35302	0.0499162	327.31	Central/nonobstroctive sleep apnea	neurological
1080	754	0.0212016	0.00397346	0.0384297	0.0158631	1	0	0.0158631	2.41205	0.0511393	754	Congenital musculoskeletal deformities of spine	congenital anomalies
1081	334	-0.0756016	-0.506129	0.354926	0.73071	1	0	0.73071	-0.344181	0.0260206	334	Degenerative disease of the spinal cord	neurological
1082	857	0.0260006	0.00528408	0.0467172	0.0138965	1	0	0.0138965	2.45993	0.0639597	857	Mechanical complication of unspecified genitourinary device implant and graft	injuries & poisonings
1083	172.11	0.0576701	-0.268641	0.383981	0.729044	1	0	0.729044	0.346397	0.0199768	172.11	Melanomas of skin	neoplasms
1084	284	-0.123727	-0.838372	0.590918	0.734356	1	0	0.734356	-0.339337	0.0419852	284	Aplastic anemia	hematopoietic
1085	556.1	-0.0342686	-0.0993345	0.0307974	0.30194	1	0	0.30194	-1.03228	0.0353748	556.1	Ulceration of intestine	digestive
1086	803.3	-0.0572474	-0.271634	0.157139	0.600713	1	0	0.600713	-0.523375	0.0299619	803.3	Fracture of clavicle or scapula	injuries & poisonings
1087	458.1	-0.120291	-1.59845	1.35786	0.873273	1	0	0.873273	-0.159503	0.0191867	458.1	Orthostatic hypotension	circulatory system
1088	270.38	-0.0157576	-0.0253976	-0.00611754	0.00135622	1	0	0.00135622	-3.20381	0.0504843	270.38	Other specified disorders of plasma protein metabolism	endocrine/metabolic
1089	531.4	0.0130292	0.00555593	0.0205025	0.000632828	1	0	0.000632828	3.41714	0.0445226	531.4	Peptic ulcer site unspecified	digestive
1090	750.1	-0.0193338	-0.0300761	-0.00859144	0.000419413	1	0	0.000419413	-3.52756	0.068201	750.1	Upper gastrointestinal congenital anomalies	congenital anomalies
1091	531.2	0.0122775	0.00545648	0.0190986	0.000418879	1	0	0.000418879	3.52789	0.0433139	531.2	Gastric ulcer	digestive
1092	733.4	-0.0517286	-0.181848	0.0783913	0.435868	1	0	0.435868	-0.779189	0.0403063	733.4	Aseptic necrosis of bone	musculoskeletal
1093	281.1	0.0112956	0.0052624	0.0173288	0.000242934	1	0	0.000242934	3.6696	0.0414503	281.1	Megaloblastic anemia	hematopoietic
1094	389.5	-0.0114342	-0.0169005	-0.00596793	4.13386e-05	1	0	4.13386e-05	-4.09987	0.0468788	389.5	Disorders of acoustic nerve	sense organs
1095	750.21	-0.010774	-0.0148517	-0.00669639	2.23363e-07	1	0	2.23363e-07	-5.17876	0.0557961	750.21	Congenital anomalies of intestine	congenital anomalies
1096	722.8	-0.0104378	-0.0143302	-0.00654537	1.47309e-07	1	0	1.47309e-07	-5.25589	0.0548597	722.8	Postlaminectomy syndrome	musculoskeletal
1097	724.9	-0.0331972	-0.107149	0.0407545	0.37894	1	0	0.37894	-0.879851	0.0292086	724.9	Other unspecified back disorders	musculoskeletal
1098	368.1	-0.018222	-0.0384328	0.00198883	0.0772069	1	0	0.0772069	-1.76713	0.0322005	368.1	Amblyopia	sense organs
1099	585.2	-0.0734558	-0.387643	0.240731	0.64678	1	0	0.64678	-0.458241	0.0336604	585.2	Renal failure NOS	genitourinary
1100	560.4	0.00371441	0.00304316	0.00438567	0	1	0	5e-302	37.1465	0.137977	560.4	Other intestinal obstruction	digestive
1101	723.1	0.00496321	0.00415402	0.00577239	0	1	0	5e-302	37.1465	0.184366	723.1	Torticollis	musculoskeletal
1102	366.1	0.00499182	0.00424424	0.00573941	0	1	0	5e-302	37.1465	0.185429	366.1	Nonsenile Cataract	sense organs
1103	799	-0.00440348	-0.00501707	-0.00378988	0	1	0	5e-302	-37.1465	0.163574	799	Debility unspecified	symptoms
1104	8.52	0.00365423	0.00319107	0.00411739	0	1	0	5e-302	37.1465	0.135742	8.52	Intestinal infection due to C. difficile	infectious diseases
1105	363	-0.000882518	-0.000910132	-0.000854903	0	1	0	5e-302	-37.1465	0.0327824	363	Chorioretinal inflammations scars and other disorders of choroid	sense organs
1106	575.9	0.000819117	0.000795109	0.000843124	0	1	0	5e-302	37.1465	0.0304273	575.9	Nonspecific abnormal findings on radiological and other examination of biliary tract	digestive
1107	571.51	-0.0846818	-0.48163	0.312266	0.675851	1	0	0.675851	-0.418131	0.0354081	571.51	Cirrhosis of liver without mention of alcohol	digestive
1108	969	-0.31997	-23.6161	22.9761	0.978523	1	0	0.978523	-0.0269205	0.00861375	969	Poisoning by psychotropic agents	injuries & poisonings
1109	297.2	-0.343395	-25.345	24.6582	0.978523	1	0	0.978523	-0.0269205	0.00924435	297.2	Suicide or self-inflicted injury	mental disorders
1110	509.2	-0.159988	-2.48598	2.166	0.892759	1	0	0.892759	-0.134814	0.0215686	509.2	Respiratory insufficiency	respiratory
1111	560.3	-0.267515	-4.08036	3.54533	0.890622	1	0	0.890622	-0.137517	0.0367877	560.3	Peritoneal or intestinal adhesions	digestive
1112	480.2	-0.24842	-3.6447	3.14786	0.886003	1	0	0.886003	-0.143364	0.0356145	480.2	Viral pneumonia	respiratory
1113	729.1	-0.280239	-3.87414	3.31366	0.87853	1	0	0.87853	-0.152833	0.0428298	729.1	Rheumatism unspecified and fibrositis	musculoskeletal
1114	447.1	-0.308735	-3.9981	3.38063	0.869718	1	0	0.869718	-0.164017	0.0506377	447.1	Stricture of artery	circulatory system
1115	411.9	-0.199588	-2.51285	2.11367	0.865711	1	0	0.865711	-0.169109	0.0337521	411.9	Other acute and subacute forms of ischemic heart disease	circulatory system
1116	580.14	-0.312725	-3.67737	3.05192	0.855448	1	0	0.855448	-0.182171	0.0569695	580.14	Chronic glomerulonephritis NOS	genitourinary
1117	442.11	-0.288851	-3.28908	2.71138	0.850327	1	0	0.850327	-0.188701	0.0545066	442.11	Abdominal aortic aneurysm	circulatory system
1118	530.12	-0.11441	-1.29124	1.06242	0.848879	1	0	0.848879	-0.190548	0.0218006	530.12	Ulcer of esophagus	digestive
1119	81	-0.184673	-1.98836	1.61902	0.840951	1	0	0.840951	-0.200677	0.0370595	81	Infection/inflammation of internal prosthetic device; implant; and graft	infectious diseases
1120	501	-0.156588	-1.59746	1.28428	0.831323	1	0	0.831323	-0.213005	0.033354	501	Pneumonitis due to inhalation of food or vomitus	respiratory
1121	289.5	-0.217836	-2.13364	1.69797	0.823643	1	0	0.823643	-0.222861	0.0485473	289.5	Diseases of spleen	hematopoietic
1122	317.11	-0.272335	-2.5594	2.01473	0.815459	1	0	0.815459	-0.23339	0.0635602	317.11	Alcoholic liver damage	mental disorders
1123	578.1	-0.125557	-1.11686	0.865742	0.803939	1	0	0.803939	-0.248252	0.0311698	578.1	Hematemesis	digestive
1124	38.1	-0.120807	-1.0049	0.763291	0.788836	1	0	0.788836	-0.267823	0.0323549	38.1	Gram negative septicemia	infectious diseases
1125	802	-0.117157	-0.973323	0.739009	0.788542	1	0	0.788542	-0.268205	0.031422	802	Fracture of pelvis	injuries & poisonings
1126	571.81	-0.208651	-1.7207	1.3034	0.786802	1	0	0.786802	-0.270465	0.0564328	571.81	Portal hypertension	digestive
1127	276.11	-0.162436	-1.26276	0.937891	0.772317	1	0	0.772317	-0.289345	0.0470001	276.11	Hyperosmolality and/or hypernatremia	endocrine/metabolic
1128	38.2	-0.181367	-1.39294	1.03021	0.769214	1	0	0.769214	-0.293403	0.0532136	38.2	Gram positive septicemia	infectious diseases
1129	415.21	-0.201115	-1.51252	1.11029	0.763732	1	0	0.763732	-0.300583	0.0604518	415.21	Primary pulmonary hypertension	circulatory system
1130	281.13	-0.200309	-1.41659	1.01597	0.746853	1	0	0.746853	-0.322792	0.064658	281.13	Folate-deficiency anemia	hematopoietic
1131	430.1	-0.121202	-0.841201	0.598798	0.741447	1	0	0.741447	-0.329938	0.0399891	430.1	Subarachnoid hemorrhage	circulatory system
1132	290.16	-0.125398	-0.86793	0.617135	0.740643	1	0	0.740643	-0.331002	0.0415068	290.16	Vascular dementia	mental disorders
1133	331.9	-0.117162	-0.809989	0.575666	0.740305	1	0	0.740305	-0.331449	0.0388332	331.9	Cerebral degeneration unspecified	neurological
1134	571.8	-0.16379	-1.11296	0.785378	0.735197	1	0	0.735197	-0.33822	0.0553971	571.8	Liver abscess and sequelae of chronic liver disease	digestive
1135	394.3	-0.0819274	-0.549135	0.38528	0.731074	1	0	0.731074	-0.343697	0.0281582	394.3	Aortic valve disease	circulatory system
1136	292.6	-0.154337	-1.03167	0.722997	0.730249	1	0	0.730249	-0.344794	0.0532143	292.6	Hallucinations	mental disorders
1137	571.6	-0.18278	-1.21047	0.84491	0.727393	1	0	0.727393	-0.348596	0.0637161	571.6	Primary biliary cirrhosis	digestive
1138	559	-0.0926574	-0.605968	0.420653	0.72349	1	0	0.72349	-0.353799	0.0327821	559	Ileostomy status	digestive
1139	747.13	-0.0688246	-0.449995	0.312346	0.723414	1	0	0.723414	-0.3539	0.024357	747.13	Congenital anomalies of great vessels	congenital anomalies
1140	433.12	-0.176546	-1.15365	0.800562	0.723236	1	0	0.723236	-0.354138	0.0625218	433.12	Cerebral atherosclerosis	circulatory system
1141	592.12	-0.116023	-0.756188	0.524143	0.722419	1	0	0.722419	-0.355227	0.0412144	592.12	Chronic cystitis	genitourinary
1142	287.31	-0.160828	-1.03855	0.716897	0.719493	1	0	0.719493	-0.359136	0.0577593	287.31	Primary thrombocytopenia	hematopoietic
1143	184.2	-0.138448	-0.853851	0.576956	0.704461	1	0	0.704461	-0.379306	0.052514	184.2	Cancer of other female genital organs (excluding uterus and ovary)	neoplasms
1144	198.6	-0.0589438	-0.361344	0.243456	0.702429	1	0	0.702429	-0.382044	0.0225191	198.6	Secondary malignancy of bone	neoplasms
1145	528.11	-0.140993	-0.853227	0.571241	0.698017	1	0	0.698017	-0.387998	0.0547049	528.11	Stomatitis and mucositis (ulcerative)	digestive
1146	480.5	-0.152366	-0.895194	0.590461	0.687662	1	0	0.687662	-0.402029	0.0612558	480.5	Bronchopneumonia and lung abscess	respiratory
1147	276.42	-0.149142	-0.867178	0.568893	0.683928	1	0	0.683928	-0.407109	0.0607172	276.42	Alkalosis	endocrine/metabolic
1148	592.13	-0.157606	-0.91243	0.597219	0.682361	1	0	0.682361	-0.409244	0.0644991	592.13	Chronic interstitial cystitis	genitourinary
1149	580.2	-0.139288	-0.796339	0.517762	0.677775	1	0	0.677775	-0.415501	0.0578744	580.2	Nephrotic syndrome without mention of glomerulonephritis	genitourinary
1150	198.5	-0.0825981	-0.468777	0.303581	0.675058	1	0	0.675058	-0.419216	0.0346264	198.5	Secondary malignancy of brain/spine	neoplasms
1151	290.11	-0.0608186	-0.341544	0.219907	0.671107	1	0	0.671107	-0.42463	0.0258254	290.11	Alzheimer's disease	mental disorders
1152	331.1	-0.108152	-0.606651	0.390346	0.670666	1	0	0.670666	-0.425234	0.0459901	331.1	Hydrocephalus	neurological
1153	384.4	-0.110266	-0.607921	0.387388	0.664084	1	0	0.664084	-0.434281	0.0478866	384.4	Perforation of tympanic membrane	sense organs
1154	430.2	-0.0877625	-0.482344	0.306819	0.662879	1	0	0.662879	-0.435942	0.0382593	430.2	Intracerebral hemorrhage	circulatory system
1155	853	-0.125961	-0.690368	0.438446	0.661806	1	0	0.661806	-0.437421	0.0550979	853	Complication of colostomy or enterostomy	injuries & poisonings
1156	697	-0.116929	-0.634683	0.400824	0.658022	1	0	0.658022	-0.442646	0.0517584	697	Sarcoidosis	dermatologic
1157	441.1	-0.135574	-0.734071	0.462924	0.657053	1	0	0.657053	-0.443986	0.0601928	441.1	Acute vascular insufficiency of intestine	circulatory system
1158	427.42	-0.0853931	-0.443801	0.273015	0.640512	1	0	0.640512	-0.466983	0.0398771	427.42	Cardiac arrest	circulatory system
1159	150	-0.106562	-0.540648	0.327524	0.630409	1	0	0.630409	-0.481152	0.0512724	150	Cancer of esophagus	neoplasms
1160	624.2	0.0792631	-0.235847	0.394373	0.621999	1	0	0.621999	0.49302	0.0390783	624.2	Atrophy of female genital tract	genitourinary
1161	751.11	0.118324	-0.342438	0.579086	0.614732	1	0	0.614732	0.50333	0.0595561	751.11	Congenital anomalies of female genital organs	congenital anomalies
1162	791	-0.0931284	-0.451467	0.26521	0.610483	1	0	0.610483	-0.509384	0.0474381	791	Gangrene	symptoms
1163	426.24	-0.0892351	-0.429443	0.250972	0.607182	1	0	0.607182	-0.5141	0.0458758	426.24	Atrioventricular block complete	circulatory system
1164	189.21	-0.0673498	-0.319347	0.184647	0.600392	1	0	0.600392	-0.523838	0.0352804	189.21	Malignant neoplasm of bladder	neoplasms
1165	70.4	-0.107329	-0.465926	0.251267	0.557449	1	0	0.557449	-0.586635	0.0629632	70.4	Chronic hepatitis	infectious diseases
1166	202.24	-0.081573	-0.351697	0.188551	0.553925	1	0	0.553925	-0.591889	0.0482822	202.24	Large cell lymphoma	neoplasms
1167	426.23	-0.0837675	-0.34864	0.181105	0.53535	1	0	0.53535	-0.619861	0.0519242	426.23	Second degree AV block	circulatory system
1168	836	-0.0984781	-0.409468	0.212512	0.534828	1	0	0.534828	-0.620653	0.0611208	836	Traumatic arthropathy	injuries & poisonings
1169	344	-0.0817565	-0.331633	0.16812	0.521336	1	0	0.521336	-0.641287	0.0524294	344	Other paralytic syndromes	neurological
1170	385.3	-0.0982616	-0.398116	0.201593	0.520687	1	0	0.520687	-0.642286	0.063112	385.3	Cholesteatoma	sense organs
1171	614.53	0.0690964	-0.117626	0.255819	0.468271	1	0	0.468271	0.725295	0.0501152	614.53	Cyst or abscess of Bartholin's gland	genitourinary
1172	520.2	-0.0489246	-0.168435	0.0705855	0.422334	1	0	0.422334	-0.802378	0.039256	520.2	Disturbances in tooth eruption	digestive
1173	818	0.04973	-0.069634	0.169094	0.414165	1	0	0.414165	0.816585	0.0406088	818	Intracranial hemorrhage (injury)	injuries & poisonings
1174	252.2	0.0716132	-0.0838415	0.227068	0.366573	1	0	0.366573	0.902912	0.0646604	252.2	Hypoparathyroidism	endocrine/metabolic
1175	569.1	-0.0565694	-0.174234	0.0610954	0.346037	1	0	0.346037	-0.942304	0.0533056	569.1	Toxic gastroenteritis and colitis	digestive
1176	285.22	-0.0536641	-0.157025	0.0496968	0.308861	1	0	0.308861	-1.01762	0.0546094	285.22	Anemia in neoplastic disease	hematopoietic
1177	962.3	-0.0499432	-0.140413	0.0405261	0.279248	1	0	0.279248	-1.08201	0.0540391	962.3	Hormones and synthetic substitutes causing adverse effects in therapeutic use	injuries & poisonings
1178	159.4	0.0513951	-0.0319842	0.134774	0.226991	1	0	0.226991	1.20815	0.0620929	159.4	Malignant neoplasm of retroperitoneum and peritoneum	neoplasms
1179	191.11	0.0466269	-0.0287349	0.121989	0.225257	1	0	0.225257	1.21267	0.056543	191.11	Cancer of brain	neoplasms
1180	189.2	0.0461909	-0.0251979	0.11758	0.204732	1	0	0.204732	1.26818	0.0585786	189.2	Cancer of bladder	neoplasms
1181	151	-0.0436498	-0.109318	0.0220186	0.192639	1	0	0.192639	-1.30281	0.0568675	151	Cancer of stomach	neoplasms
1182	155	-0.0485054	-0.119646	0.0226348	0.181424	1	0	0.181424	-1.33638	0.0648218	155	Cancer of liver and intrahepatic bile duct	neoplasms
1183	253.7	-0.0456411	-0.109409	0.0181264	0.16066	1	0	0.16066	-1.40285	0.0640278	253.7	Other disorders of neurohypophysis	endocrine/metabolic
1184	870.5	0.0379892	-0.00960525	0.0855837	0.117713	1	0	0.117713	1.56444	0.059432	870.5	Open wound of lip and mouth	injuries & poisonings
1185	586.4	-0.0256411	-0.0568751	0.00559299	0.10761	1	0	0.10761	-1.60903	0.0412572	586.4	Stricture/obstruction of ureter	genitourinary
1186	332	0.0184188	-0.0038171	0.0406548	0.104474	1	0	0.104474	1.62354	0.0299037	332	Parkinson's disease	neurological
1187	368.3	-0.033852	-0.0732728	0.00556877	0.0923517	1	0	0.0923517	-1.68312	0.056977	368.3	Anisometropia	sense organs
1188	715.2	0.0350303	-0.0043202	0.0743807	0.0810169	1	0	0.0810169	1.74482	0.0611214	715.2	Ankylosing spondylitis	musculoskeletal
1189	227.2	-0.0275813	-0.0575536	0.00239099	0.0712871	1	0	0.0712871	-1.80364	0.0497468	227.2	Benign neoplasm of parathyroid gland	neoplasms
1190	157	0.0180584	0.0020152	0.0341017	0.0273702	1	0	0.0273702	2.2062	0.0398405	157	Pancreatic cancer	neoplasms
1191	202.21	-0.0256214	-0.0457166	-0.0055262	0.0124544	1	0	0.0124544	-2.499	0.0640279	202.21	Nodular lymphoma	neoplasms
1192	531.1	-0.0240939	-0.0426682	-0.00551964	0.011008	1	0	0.011008	-2.54245	0.0612574	531.1	Hemorrhage from gastrointestinal ulcer	digestive
1193	348.2	-0.0207433	-0.0352571	-0.00622951	0.00509039	1	0	0.00509039	-2.80126	0.0581073	348.2	Cerebral edema and compression of brain	neurological
1194	411.41	0.0135882	0.00568997	0.0214865	0.000746239	1	0	0.000746239	3.372	0.0458195	411.41	Aneurysm and dissection of heart	circulatory system
1195	348.7	0.0168899	0.00796808	0.0258117	0.000206864	1	0	0.000206864	3.71048	0.0626696	348.7	Coma	neurological
1196	575.1	-0.0103824	-0.0152063	-0.00555861	2.45876e-05	1	0	2.45876e-05	-4.21855	0.0437989	575.1	Cholangitis	digestive
1197	870.1	0.011281	0.00670539	0.0158566	1.34946e-06	1	0	1.34946e-06	4.83233	0.0545133	870.1	Open wound or laceration of eye or eyelid	injuries & poisonings
1198	204.4	-0.00915968	-0.0126491	-0.00567024	2.6761e-07	1	0	2.6761e-07	-5.14494	0.047126	204.4	Multiple myeloma	neoplasms
1199	204.12	0.0103292	0.00670167	0.0139567	2.39148e-08	1	0	2.39148e-08	5.58099	0.0576472	204.12	Lymphoid leukemia chronic	neoplasms
1200	361.1	0.00550876	0.00389749	0.00712003	2.0695e-11	1	0	2.0695e-11	6.70103	0.0369144	361.1	Retinal detachment with retinal defect	sense organs
1201	189.11	-0.00512215	-0.00631866	-0.00392564	0	1	0	5e-302	-37.1465	0.19027	189.11	Malignant neoplasm of kidney except pelvis	neoplasms
1202	379.5	-0.00497954	-0.00597914	-0.00397995	0	1	0	5e-302	-37.1465	0.184972	379.5	Disorders of iris and ciliary body	sense organs
1203	386.1	-0.002402	-0.00266455	-0.00213946	0	1	0	5e-302	-37.1465	0.0892259	386.1	Meniere's disease	sense organs

## Sheet: EUR_meta_MAPS
Variable	Estimate	CI_lower	CI_upper	p_value	k_value	i2_value	p_value2	Z_value	SE_value	ICD_SYSTEM	ICD_DESCRIPTION	phecode	PHECODE_DESCRIPTION	CATEGORY
203.01	-22.3316	-33.2981	-11.3652	6.57174e-05	1	0	6.57174e-05	-3.99128	89.1319	ICD9CM	Multiple myeloma in remission	CA_120.1	Myeloid	Neoplasms
203.01	-22.3316	-33.2981	-11.3652	6.57174e-05	1	0	6.57174e-05	-3.99128	89.1319	ICD9CM	Multiple myeloma in remission	CA_123.1	Multiple myeloma	Neoplasms
238.6	-22.3316	-33.2981	-11.3652	6.57174e-05	1	0	6.57174e-05	-3.99128	89.1319	ICD9CM	Neoplasm of uncertain behavior of plasma cells	CA_120.11	Plasma cell	Neoplasms
238.6	-22.3316	-33.2981	-11.3652	6.57174e-05	1	0	6.57174e-05	-3.99128	89.1319	ICD9CM	Neoplasm of uncertain behavior of plasma cells	CA_125	Other malignant neoplasms of lymphoid, hematopoietic and related tissue	Neoplasms
288.02	-22.3316	-33.2981	-11.3652	6.57174e-05	1	0	6.57174e-05	-3.99128	89.1319	ICD9CM	Cyclic neutropenia	BI_170.14	Cyclic neutropenia	Blood/Immune
435.9	-22.3316	-33.2981	-11.3652	6.57174e-05	1	0	6.57174e-05	-3.99128	89.1319	ICD9CM	Unspecified transient cerebral ischemia	CV_431.2	Transient cerebral ischemic attack [TIA]	Cardiovascular
203	-22.3316	-33.2981	-11.3652	6.57174e-05	1	0	6.57174e-05	-3.99128	89.1319	ICD9CM	Multiple myeloma without mention of having achieved remission	CA_120.1	Myeloid	Neoplasms
203	-22.3316	-33.2981	-11.3652	6.57174e-05	1	0	6.57174e-05	-3.99128	89.1319	ICD9CM	Multiple myeloma without mention of having achieved remission	CA_123.1	Multiple myeloma	Neoplasms
I97.89	-20.4977	-31.4895	-9.50593	0.000257133	1	0	0.000257133	-3.65505	74.9202
C49.3	-20.4977	-31.4895	-9.50593	0.000257133	1	0	0.000257133	-3.65505	74.9202	ICD10CM	Malignant neoplasm of connective and soft tissue of thorax	CA_104.3	Malignant neoplasm of connective and soft tissue	Neoplasms
C49.3	-20.4977	-31.4895	-9.50593	0.000257133	1	0	0.000257133	-3.65505	74.9202	ICD10CM	Malignant neoplasm of connective and soft tissue of thorax	CA_130	Cancer (solid tumor, excluding BCC)	Neoplasms
T81.49XA	-20.4977	-31.4895	-9.50593	0.000257133	1	0	0.000257133	-3.65505	74.9202
E87.2	-20.4977	-31.4895	-9.50593	0.000257133	1	0	0.000257133	-3.65505	74.9202	ICD10CM	Acidosis	EM_256.31	Acidosis	Endocrine/Metab
I65.23	-20.4977	-31.4895	-9.50593	0.000257133	1	0	0.000257133	-3.65505	74.9202	ICD10CM	Occlusion and stenosis of bilateral carotid arteries	CV_433.21	Carotid artery stenosis	Cardiovascular
E86.1	-20.4977	-31.4895	-9.50593	0.000257133	1	0	0.000257133	-3.65505	74.9202	ICD10CM	Hypovolemia	EM_256.72	Hypovolemia	Endocrine/Metab
E44.0	-20.4977	-31.4895	-9.50593	0.000257133	1	0	0.000257133	-3.65505	74.9202	ICD10CM	Moderate protein-calorie malnutrition	EM_230.1	Protein-calorie malnutrition	Endocrine/Metab
I95.9	-20.4977	-31.4895	-9.50593	0.000257133	1	0	0.000257133	-3.65505	74.9202	ICD10CM	Hypotension, unspecified	CV_446	Hypotension	Cardiovascular
I71.4	-20.4977	-31.4895	-9.50593	0.000257133	1	0	0.000257133	-3.65505	74.9202	ICD10CM	Abdominal aortic aneurysm, without rupture	CV_438.11	Abdominal aortic aneurysm	Cardiovascular
I25.118	-20.4977	-31.4895	-9.50593	0.000257133	1	0	0.000257133	-3.65505	74.9202	ICD10CM	Atherosclerotic heart disease of native coronary artery with other forms of angina pectoris	CV_403	Angina pectoris	Cardiovascular
I25.118	-20.4977	-31.4895	-9.50593	0.000257133	1	0	0.000257133	-3.65505	74.9202	ICD10CM	Atherosclerotic heart disease of native coronary artery with other forms of angina pectoris	CV_404.2	Coronary atherosclerosis [Atherosclerotic heart disease]	Cardiovascular
I25.118	-20.4977	-31.4895	-9.50593	0.000257133	1	0	0.000257133	-3.65505	74.9202	ICD10CM	Atherosclerotic heart disease of native coronary artery with other forms of angina pectoris	CV_436	Atherosclerosis [ASCVD]	Cardiovascular
I73.9	-20.4977	-31.4895	-9.50593	0.000257133	1	0	0.000257133	-3.65505	74.9202	ICD10CM	Peripheral vascular disease, unspecified	CV_448.9	Peripheral vascular disease NOS [includes PAD]	Cardiovascular
284.19	-11.7416	-18.0788	-5.40447	0.000281743	1	0	0.000281743	-3.63153	42.6401	ICD9CM	Other pancytopenia	BI_162.8	Pancytopenia	Blood/Immune
780.61	-11.7416	-18.0788	-5.40447	0.000281743	1	0	0.000281743	-3.63153	42.6401	ICD9CM	Fever presenting with conditions classified elsewhere	SS_805	Fever	Symptoms
288	-11.7416	-18.0788	-5.40447	0.000281743	1	0	0.000281743	-3.63153	42.6401	ICD9CM	Neutropenia NOS	BI_170.1	Neutropenia	Blood/Immune
70.7	-20.2999	-31.2579	-9.34179	0.000282426	1	0	0.000282426	-3.63091	73.7069	ICD9CM	Unspecified viral hepatitis C without hepatic coma	ID_054.3	Hepatitis C	Infections
70.7	-20.2999	-31.2579	-9.34179	0.000282426	1	0	0.000282426	-3.63091	73.7069	ICD9CM	Unspecified viral hepatitis C without hepatic coma	ID_089.2	Viral infections	Infections
70.7	-20.2999	-31.2579	-9.34179	0.000282426	1	0	0.000282426	-3.63091	73.7069	ICD9CM	Unspecified viral hepatitis C without hepatic coma	GI_540.3	Viral hepatitits	Gastrointestinal
I25.10	-14.3441	-22.1243	-6.564	0.000301946	1	0	0.000301946	-3.61363	51.8344	ICD10CM	Atherosclerotic heart disease of native coronary artery without angina pectoris	CV_404.2	Coronary atherosclerosis [Atherosclerotic heart disease]	Cardiovascular
I25.10	-14.3441	-22.1243	-6.564	0.000301946	1	0	0.000301946	-3.61363	51.8344	ICD10CM	Atherosclerotic heart disease of native coronary artery without angina pectoris	CV_436	Atherosclerosis [ASCVD]	Cardiovascular
77.99	-13.6403	-21.4132	-5.8673	0.000582842	1	0	0.000582842	-3.43948	46.9153	ICD9CM	Unspecified diseases of conjunctiva due to viruses	ID_089.2	Viral infections	Infections
77.99	-13.6403	-21.4132	-5.8673	0.000582842	1	0	0.000582842	-3.43948	46.9153	ICD9CM	Unspecified diseases of conjunctiva due to viruses	SO_379.2	Eye infection, viral	Sense organs
M06.9	-19.1948	-30.1916	-8.19803	0.000623531	1	0	0.000623531	-3.42117	65.6687	ICD10CM	Rheumatoid arthritis, unspecified	BI_181	Autoimmune disease	Blood/Immune
M06.9	-19.1948	-30.1916	-8.19803	0.000623531	1	0	0.000623531	-3.42117	65.6687	ICD10CM	Rheumatoid arthritis, unspecified	MS_705.1	Rheumatoid arthritis	Muscloskeletal
M79.605	-19.1948	-30.1916	-8.19803	0.000623531	1	0	0.000623531	-3.42117	65.6687	ICD10CM	Pain in left leg	SS_809.32	Pain in leg*	Symptoms
M25.542	-19.1948	-30.1916	-8.19803	0.000623531	1	0	0.000623531	-3.42117	65.6687	ICD10CM	Pain in joints of left hand	MS_713.35	Pain in joints of hand	Muscloskeletal
I82.402	-19.1948	-30.1916	-8.19803	0.000623531	1	0	0.000623531	-3.42117	65.6687	ICD10CM	Acute embolism and thrombosis of unspecified deep veins of left lower extremity	CV_440.11	Deep vein thrombosis [DVT]	Cardiovascular
M06.031	-19.1948	-30.1916	-8.19803	0.000623531	1	0	0.000623531	-3.42117	65.6687	ICD10CM	Rheumatoid arthritis without rheumatoid factor, right wrist	BI_181	Autoimmune disease	Blood/Immune
M06.031	-19.1948	-30.1916	-8.19803	0.000623531	1	0	0.000623531	-3.42117	65.6687	ICD10CM	Rheumatoid arthritis without rheumatoid factor, right wrist	MS_705.11	Rheumatoid arthritis without rheumatoid factor*	Muscloskeletal
M17.0	-19.1948	-30.1916	-8.19803	0.000623531	1	0	0.000623531	-3.42117	65.6687	ICD10CM	Bilateral primary osteoarthritis of knee	MS_708	Osteoarthritis	Muscloskeletal
M06.032	-19.1948	-30.1916	-8.19803	0.000623531	1	0	0.000623531	-3.42117	65.6687	ICD10CM	Rheumatoid arthritis without rheumatoid factor, left wrist	BI_181	Autoimmune disease	Blood/Immune
M06.032	-19.1948	-30.1916	-8.19803	0.000623531	1	0	0.000623531	-3.42117	65.6687	ICD10CM	Rheumatoid arthritis without rheumatoid factor, left wrist	MS_705.11	Rheumatoid arthritis without rheumatoid factor*	Muscloskeletal
437.9	-19.0946	-30.0998	-8.08932	0.000672174	1	0	0.000672174	-3.40068	64.9346	ICD9CM	Unspecified cerebrovascular disease	CV_433	Other cerebrovascular disease	Cardiovascular
R73.9	-10.913	-17.2846	-4.5414	0.000787933	1	0	0.000787933	-3.357	36.635	ICD10CM	Hyperglycemia, unspecified	EM_204.4	Hyperglycemia	Endocrine/Metab
780.6	-9.41663	-14.9198	-3.91346	0.000797065	1	0	0.000797065	-3.35381	31.5816	ICD9CM	Fever, unspecified	SS_805	Fever	Symptoms
496	-13.3185	-21.1123	-5.52469	0.000809991	1	0	0.000809991	-3.34936	44.6084	ICD9CM	Chronic airway obstruction, not elsewhere classified	RE_474	Chronic obstructive pulmonary disease [COPD]	Respiratory
211.1	-18.6635	-29.6533	-7.67359	0.000872981	1	0	0.000872981	-3.32855	62.1223	ICD9CM	Benign neoplasm of stomach	CA_136.2	Benign neoplasm of stomach	Neoplasms
571.6	-18.6635	-29.6533	-7.67359	0.000872981	1	0	0.000872981	-3.32855	62.1223	ICD9CM	Biliary cirrhosis	GI_542.8	Biliary cirrhosis	Gastrointestinal
R00.1	-13.2311	-21.0245	-5.43781	0.000875998	1	0	0.000875998	-3.32759	44.0279	ICD10CM	Bradycardia, unspecified	CV_417.3	Bradycardia	Cardiovascular
486	-7.60867	-12.1006	-3.11671	0.00090039	1	0	0.00090039	-3.31993	25.2603	ICD9CM	Pneumonia, organism unspecified	RE_468	Pneumonia	Respiratory
748.6	-18.5977	-29.579	-7.61649	0.000901987	1	0	0.000901987	-3.31944	61.734	ICD9CM	Lung anomaly NOS	CM_762.3	Congenital malformations of lung	Congenital
381.9	-18.5977	-29.579	-7.61649	0.000901987	1	0	0.000901987	-3.31944	61.734	ICD9CM	Unspecified Eustachian tube disorder	SO_391.2	Eustachian tube disorders	Sense organs
388.71	-18.5977	-29.579	-7.61649	0.000901987	1	0	0.000901987	-3.31944	61.734	ICD9CM	Otogenic pain	SO_392.1	Otalgia [ear pain]	Sense organs
724	-18.5977	-29.579	-7.61649	0.000901987	1	0	0.000901987	-3.31944	61.734	ICD9CM	Spinal stenosis of unspecified region	MS_715.4	Spinal stenosis	Muscloskeletal
402.1	-18.5977	-29.579	-7.61649	0.000901987	1	0	0.000901987	-3.31944	61.734	ICD9CM	Benign hypertensive heart disease without heart failure	CV_401.2	Hypertensive heart disease	Cardiovascular
287.2	-18.5977	-29.579	-7.61649	0.000901987	1	0	0.000901987	-3.31944	61.734	ICD9CM	Other nonthrombocytopenic purpuras	BI_168.18	Other nonthrombocytopenic purpura	Blood/Immune
8.43	-18.5977	-29.579	-7.61649	0.000901987	1	0	0.000901987	-3.31944	61.734	ICD9CM	Intestinal infection due to campylobacter	ID_030	Campylobacter	Infections
8.43	-18.5977	-29.579	-7.61649	0.000901987	1	0	0.000901987	-3.31944	61.734	ICD9CM	Intestinal infection due to campylobacter	ID_089.1	Bacterial infections	Infections
8.43	-18.5977	-29.579	-7.61649	0.000901987	1	0	0.000901987	-3.31944	61.734	ICD9CM	Intestinal infection due to campylobacter	GI_526.1	Bacterial enteritis	Gastrointestinal
573.8	-6.8616	-11.027	-2.69615	0.0012438	1	0	0.0012438	-3.22864	22.1536	ICD9CM	Other specified disorders of liver	GI_546	Other disorders of liver	Gastrointestinal
451.19	-12.7409	-20.5104	-4.97144	0.00130834	1	0	0.00130834	-3.21414	40.9511	ICD9CM	Phlebitis and thrombophlebitis of other deep vessels of lower extremities	CV_440.13	Phlebitis and thrombophlebitis	Cardiovascular
372	-18.0326	-29.0388	-7.02645	0.00132144	1	0	0.00132144	-3.21128	57.9079	ICD9CM	Acute conjunctivitis, unspecified	SO_367.1	Conjunctivitis	Sense organs
I45.10	-8.67415	-14.1808	-3.16747	0.00201914	1	0	0.00201914	-3.0874	26.7806	ICD10CM	Unspecified right bundle-branch block	CV_416.43	Right bundle branch block	Cardiovascular
337.9	-12.147	-19.9199	-4.37408	0.00219162	1	0	0.00219162	-3.06296	37.2058	ICD9CM	Autonomic nervous system disorder NEC	NS_343	Disorders of autonomic nervous system	Neurological
M79.643	-12.1323	-19.923	-4.34156	0.00227126	1	0	0.00227126	-3.05226	37.0308	ICD10CM	Pain in unspecified hand	SS_809.33	Pain in hand and fingers*	Symptoms
E87.70	-11.539	-19.3518	-3.72624	0.00379392	1	0	0.00379392	-2.89481	33.4033	ICD10CM	Fluid overload, unspecified	EM_256.6	Fluid overload	Endocrine/Metab
N99.3	-15.6389	-26.6709	-4.60684	0.00546151	1	0	0.00546151	-2.77847	43.4522	ICD10CM	Prolapse of vaginal vault after hysterectomy	GU_623.1	Uterine/Uterovaginal prolapse	Genitourinary
N81.12	-15.6389	-26.6709	-4.60684	0.00546151	1	0	0.00546151	-2.77847	43.4522	ICD10CM	Cystocele, lateral	GU_623.1	Uterine/Uterovaginal prolapse	Genitourinary
N81.10	-15.6389	-26.6709	-4.60684	0.00546151	1	0	0.00546151	-2.77847	43.4522	ICD10CM	Cystocele, unspecified	GU_623.1	Uterine/Uterovaginal prolapse	Genitourinary
Z15.09	-15.6389	-26.6709	-4.60684	0.00546151	1	0	0.00546151	-2.77847	43.4522	ICD10CM	Genetic susceptibility to other malignant neoplasm	GE_961.8	Genetic susceptibility to malignant neoplasm	Genetic
568	-15.6169	-26.6448	-4.58906	0.00550964	1	0	0.00550964	-2.77562	43.3466	ICD9CM	Peritoneal adhesions (postoperative) (postinfection)	GI_535	Intestinal or peritoneal adhesions	Gastrointestinal
614.4	-15.6169	-26.6448	-4.58906	0.00550964	1	0	0.00550964	-2.77562	43.3466	ICD9CM	Chronic or unspecified parametritis and pelvic cellulitis	GU_614.32	Chronic inflammatory pelvic disease	Genitourinary
599.9	-15.6169	-26.6448	-4.58906	0.00550964	1	0	0.00550964	-2.77562	43.3466	ICD9CM	Unspecified disorder of urethra and urinary tract	GU_597	Other disorders of urethra and urinary tract	Genitourinary
529.6	-15.6169	-26.6448	-4.58906	0.00550964	1	0	0.00550964	-2.77562	43.3466	ICD9CM	Glossodynia	GI_509.11	Glossodynia	Gastrointestinal
756.16	-15.6169	-26.6448	-4.58906	0.00550964	1	0	0.00550964	-2.77562	43.3466	ICD9CM	Klippel-Feil syndrome	CM_769.1	Klippel-Feil syndrome	Congenital
618.04	-10.9145	-18.6972	-3.13189	0.00598247	1	0	0.00598247	-2.74874	30.0013	ICD9CM	Rectocele	GU_623.1	Uterine/Uterovaginal prolapse	Genitourinary
788.39	-8.84675	-15.2034	-2.49007	0.0063762	1	0	0.0063762	-2.72778	24.132	ICD9CM	Other urinary incontinence	GU_594.3	Urinary incontinence and enuresis	Genitourinary
728.2	-15.1945	-26.2092	-4.17977	0.00685594	1	0	0.00685594	-2.70376	41.0823	ICD9CM	Muscular wasting and disuse atrophy, not elsewhere classified	MS_719.6	Muscle wasting and atrophy	Muscloskeletal
173.69	-15.0448	-26.0524	-4.03727	0.00738697	1	0	0.00738697	-2.67888	40.3032	ICD9CM	Other specified malignant neoplasm of skin of upper limb, including shoulder	CA_103	Malignant neoplasm of the skin	Neoplasms
705.83	-15.0448	-26.0524	-4.03727	0.00738697	1	0	0.00738697	-2.67888	40.3032	ICD9CM	Hidradenitis	DE_669.3	Hidradenitis suppurativa	Dermatological
388.7	-4.84732	-8.53039	-1.16425	0.00989234	1	0	0.00989234	-2.57957	12.504	ICD9CM	Otalgia NOS	SO_392.1	Otalgia [ear pain]	Sense organs
174.9	-2.55878	-4.51099	-0.606567	0.0101996	1	0	0.0101996	-2.56899	6.57347	ICD9CM	Malignant neoplasm of breast (female), unspecified	CA_105.1	Malignant neoplasm of the breast, female	Neoplasms
174.9	-2.55878	-4.51099	-0.606567	0.0101996	1	0	0.0101996	-2.56899	6.57347	ICD9CM	Malignant neoplasm of breast (female), unspecified	CA_130	Cancer (solid tumor, excluding BCC)	Neoplasms
E66.9	-8.3377	-14.7211	-1.95428	0.0104656	1	0	0.0104656	-2.56005	21.345	ICD10CM	Obesity, unspecified	EM_236.1	Obesity	Endocrine/Metab
788.5	-14.0059	-25.0138	-2.99803	0.012638	1	0	0.012638	-2.49381	34.9281	ICD9CM	Oliguria and anuria	GU_594.5	Oliguria and anuria	Genitourinary
276.52	-14.0059	-25.0138	-2.99803	0.012638	1	0	0.012638	-2.49381	34.9281	ICD9CM	Hypovolemia	EM_256.72	Hypovolemia	Endocrine/Metab
338.18	-14.0059	-25.0138	-2.99803	0.012638	1	0	0.012638	-2.49381	34.9281	ICD9CM	Other acute postoperative pain	SS_809.1	Acute pain	Symptoms
576.2	-14.0059	-25.0138	-2.99803	0.012638	1	0	0.012638	-2.49381	34.9281	ICD9CM	Obstruction of bile duct	GI_552.2	Obstruction of bile duct	Gastrointestinal
O99.210	-13.8671	-24.8837	-2.85059	0.013619	1	0	0.013619	-2.46716	34.2124	ICD10CM	Obesity complicating pregnancy, unspecified trimester	EM_236.1	Obesity	Endocrine/Metab
O99.210	-13.8671	-24.8837	-2.85059	0.013619	1	0	0.013619	-2.46716	34.2124	ICD10CM	Obesity complicating pregnancy, unspecified trimester	PP_910	Obesity or excessive weight gain in pregnancy	Pregnancy
R87.619	-13.8671	-24.8837	-2.85059	0.013619	1	0	0.013619	-2.46716	34.2124	ICD10CM	Unspecified abnormal cytological findings in specimens from cervix uteri	SS_834	Abnormal cytological findings in specimens from genital organs	Symptoms
O09.512	-13.8671	-24.8837	-2.85059	0.013619	1	0	0.013619	-2.46716	34.2124
R87.611	-13.8671	-24.8837	-2.85059	0.013619	1	0	0.013619	-2.46716	34.2124	ICD10CM	Atypical squamous cells cannot exclude high grade squamous intraepithelial lesion on cytologic smear of cervix (ASC-H)	SS_834.1	Abnormal Papanicolaou smear	Symptoms
O09.519	-13.8671	-24.8837	-2.85059	0.013619	1	0	0.013619	-2.46716	34.2124
C53.9	-13.8671	-24.8837	-2.85059	0.013619	1	0	0.013619	-2.46716	34.2124	ICD10CM	Malignant neoplasm of cervix uteri, unspecified	CA_106.13	Malignant neoplasm of the cervix	Neoplasms
C53.9	-13.8671	-24.8837	-2.85059	0.013619	1	0	0.013619	-2.46716	34.2124	ICD10CM	Malignant neoplasm of cervix uteri, unspecified	CA_130	Cancer (solid tumor, excluding BCC)	Neoplasms
O99.212	-13.8671	-24.8837	-2.85059	0.013619	1	0	0.013619	-2.46716	34.2124	ICD10CM	Obesity complicating pregnancy, second trimester	EM_236.1	Obesity	Endocrine/Metab
O99.212	-13.8671	-24.8837	-2.85059	0.013619	1	0	0.013619	-2.46716	34.2124	ICD10CM	Obesity complicating pregnancy, second trimester	PP_910	Obesity or excessive weight gain in pregnancy	Pregnancy
A59.9	-13.8671	-24.8837	-2.85059	0.013619	1	0	0.013619	-2.46716	34.2124	ICD10CM	Trichomoniasis, unspecified	ID_084.4	Trichomoniasis	Infections
A59.9	-13.8671	-24.8837	-2.85059	0.013619	1	0	0.013619	-2.46716	34.2124	ICD10CM	Trichomoniasis, unspecified	ID_088	Sexually transmitted disease	Infections
O09.529	-13.8671	-24.8837	-2.85059	0.013619	1	0	0.013619	-2.46716	34.2124
O34.42	-13.8671	-24.8837	-2.85059	0.013619	1	0	0.013619	-2.46716	34.2124	ICD10CM	Maternal care for other abnormalities of cervix, second trimester	GU_617	Noninflammatory disorders of cervix	Genitourinary
O34.42	-13.8671	-24.8837	-2.85059	0.013619	1	0	0.013619	-2.46716	34.2124	ICD10CM	Maternal care for other abnormalities of cervix, second trimester	PP_930	Maternal care for abnormality of pelvic organs	Pregnancy
O09.522	-13.8671	-24.8837	-2.85059	0.013619	1	0	0.013619	-2.46716	34.2124
Z3A.16	-13.8671	-24.8837	-2.85059	0.013619	1	0	0.013619	-2.46716	34.2124
592.9	-13.8557	-24.8673	-2.84415	0.0136539	1	0	0.0136539	-2.46624	34.1716	ICD9CM	Urinary calculus NOS	GU_585	Kidney stone disease	Genitourinary
366.16	-9.72051	-17.5155	-1.92553	0.0145189	1	0	0.0145189	-2.44416	23.7585	ICD9CM	Senile nuclear sclerosis	SO_371.3	Nuclear cataract	Sense organs
616.1	-4.87601	-8.79281	-0.959208	0.0146874	1	0	0.0146874	-2.44	11.8974	ICD9CM	Vaginitis and vulvovaginitis NOS	GU_614.52	Vaginitis and vulvovaginitis	Genitourinary
285.9	-3.16823	-5.73247	-0.603995	0.0154494	1	0	0.0154494	-2.42167	7.67242	ICD9CM	Anemia unspecified	BI_164	Anemia	Blood/Immune
518.89	-4.55569	-8.24552	-0.865862	0.0155232	1	0	0.0155232	-2.41994	11.0245	ICD9CM	Other diseases of lung, not elsewhere classified	RE_486	Other respiratory disorders	Respiratory
M17.12	-9.40832	-17.2033	-1.61339	0.017997	1	0	0.017997	-2.36568	22.2571	ICD10CM	Unilateral primary osteoarthritis, left knee	MS_708	Osteoarthritis	Muscloskeletal
R06.00	-7.60478	-14.0028	-1.20677	0.0198226	1	0	0.0198226	-2.32969	17.7168	ICD10CM	Dyspnea, unspecified	RE_488.1	Dyspnea [Shortness of breath]	Respiratory
710	-5.86051	-10.8054	-0.915601	0.0201838	1	0	0.0201838	-2.32291	13.6135	ICD9CM	Systemic lupus erythematosus	BI_181	Autoimmune disease	Blood/Immune
710	-5.86051	-10.8054	-0.915601	0.0201838	1	0	0.0201838	-2.32291	13.6135	ICD9CM	Systemic lupus erythematosus	MS_700.11	Systemic lupus erythematosus [SLE]	Muscloskeletal
757.6	-13.1564	-24.2613	-2.05158	0.0202274	1	0	0.0202274	-2.3221	30.5506	ICD9CM	Specified congenital anomalies of breast	CM_771.4	Congenital anomalies of breast	Congenital
225.1	-9.17852	-16.9777	-1.37936	0.0210746	1	0	0.0210746	-2.30665	21.1716	ICD9CM	Benign neoplasm of cranial nerves	CA_148.5	Benign neoplasm of cranial nerve	Neoplasms
369.9	-13.3626	-24.7286	-1.99664	0.0212052	1	0	0.0212052	-2.30431	30.7916	ICD9CM	Unspecified visual loss	SO_388	Blindness and low vision	Sense organs
287.5	-9.15571	-16.9488	-1.36263	0.0212952	1	0	0.0212952	-2.30271	21.0829	ICD9CM	Thrombocytopenia NOS	BI_169.1	Thrombocytopenia	Blood/Immune
458.9	-9.12903	-16.923	-1.33504	0.0216914	1	0	0.0216914	-2.29573	20.9578	ICD9CM	Hypotension NOS	CV_446	Hypotension	Cardiovascular
J93.9	-8.92299	-16.7252	-1.12073	0.0249913	1	0	0.0249913	-2.24154	20.0012	ICD10CM	Pneumothorax, unspecified	RE_484	Pneumothorax and air leak	Respiratory
244.9	1.88991	0.229607	3.55022	0.0256776	1	0	0.0256776	2.23105	4.21649	ICD9CM	Hypothyroidism NOS	EM_200.12	Hypothyroidism (not specified as secondary)	Endocrine/Metab
364	-12.5208	-23.54	-1.5016	0.0259412	1	0	0.0259412	-2.22709	27.885	ICD9CM	Acute iridocyclitis NOS	SO_367.52	Iridocyclitis	Sense organs
251.2	-12.5208	-23.54	-1.5016	0.0259412	1	0	0.0259412	-2.22709	27.885	ICD9CM	Hypoglycemia NOS	EM_204.3	Hypoglycemia	Endocrine/Metab
722.71	12.5227	1.47506	23.5703	0.0263038	1	0	0.0263038	2.2217	27.8216	ICD9CM	Intervertebral disc disorder with myelopathy, cervical region	NS_348.2	Myelopathies	Neurological
722.71	12.5227	1.47506	23.5703	0.0263038	1	0	0.0263038	2.2217	27.8216	ICD9CM	Intervertebral disc disorder with myelopathy, cervical region	MS_716	Intervertebral disc disorder	Muscloskeletal
415.19	6.94928	0.547955	13.3506	0.0333556	1	0	0.0333556	2.12778	14.7865	ICD9CM	Other pulmonary embolism and infarction	CV_440.3	Pulmonary embolism	Cardiovascular
371.57	-11.953	-22.9948	-0.9111	0.0338607	1	0	0.0338607	-2.12173	25.3609	ICD9CM	Endothelial corneal dystrophy	SO_369.7	Endothelial corneal dystrophy [Fuchs' dystrophy]	Sense organs
Z15.01	-8.37336	-16.1713	-0.575455	0.0353226	1	0	0.0353226	-2.10464	17.6229	ICD10CM	Genetic susceptibility to malignant neoplasm of breast	GE_961.81	Genetic susceptibility to malignant neoplasm of breast	Genetic
E03.4	11.7639	0.74954	22.7782	0.0363152	1	0	0.0363152	2.09338	24.6262	ICD10CM	Atrophy of thyroid (acquired)	EM_200.6	Atrophy of thyroid*	Endocrine/Metab
256.39	-11.6566	-22.7009	-0.612325	0.0385773	1	0	0.0385773	-2.06867	24.1136	ICD9CM	Other ovarian failure	EM_214.1	Ovarian failure	Endocrine/Metab
75	-11.4434	-22.5031	-0.383712	0.0425601	1	0	0.0425601	-2.028	23.2073	ICD9CM	Infectious mononucleosis	ID_052.4	Infectious mononucleosis	Infections
75	-11.4434	-22.5031	-0.383712	0.0425601	1	0	0.0425601	-2.028	23.2073	ICD9CM	Infectious mononucleosis	ID_089.2	Viral infections	Infections
890.1	-11.285	-22.3148	-0.255278	0.0449242	1	0	0.0449242	-2.00536	22.6306
728.86	-11.285	-22.3148	-0.255278	0.0449242	1	0	0.0449242	-2.00536	22.6306	ICD9CM	Necrotizing fasciitis	MS_722.3	Necrotizing fasciitis	Muscloskeletal
599.6	-11.285	-22.3148	-0.255278	0.0449242	1	0	0.0449242	-2.00536	22.6306	ICD9CM	Urinary obstruction NOS	GU_581.3	Obstructive and reflux uropathy	Genitourinary
V49.89	-4.58229	-9.09668	-0.0679053	0.046648	1	0	0.046648	-1.98948	9.11639
753.1	-7.91958	-15.7487	-0.0904521	0.0474072	1	0	0.0474072	-1.98264	15.7017	ICD9CM	Cystic kidney disease, unspecified	CM_761.13	Cystic kidney disease	Congenital
785	-4.5586	-9.07259	-0.0446154	0.0477741	1	0	0.0477741	-1.97937	9.02318	ICD9CM	Tachycardia NOS	CV_417.2	Tachycardia	Cardiovascular
518	-4.9661	-9.91256	-0.0196455	0.0490929	1	0	0.0490929	-1.96778	9.77222	ICD9CM	Pulmonary collapse	RE_479.6	Pulmonary collapse [Atelectasis]	Respiratory
727.04	-10.9777	-22.0102	0.0548427	0.0511455	1	0	0.0511455	-1.95026	21.4093	ICD9CM	Radial styloid tenosynovitis	MS_721.12	Radial styloid tenosynovitis [de Quervain]	Muscloskeletal
576.9	-10.9506	-21.9761	0.07494	0.0515734	1	0	0.0515734	-1.94668	21.3172	ICD9CM	Unspecified disorder of biliary tract	GI_552	Other diseases of biliary tract	Gastrointestinal
N64.1	10.9681	-0.0756603	22.0119	0.051586	1	0	0.051586	1.94657	21.3503	ICD10CM	Fat necrosis of breast	GU_612.1	Inflammatory disease of breast	Genitourinary
D49.9	10.9681	-0.0756603	22.0119	0.051586	1	0	0.051586	1.94657	21.3503	ICD10CM	Neoplasm of unspecified behavior of unspecified site	CA_112	Malignant neoplasm of other and ill-defined sites	Neoplasms
E78.5	-4.1612	-8.35753	0.0351354	0.051945	1	0	0.051945	-1.94359	8.08765	ICD10CM	Hyperlipidemia, unspecified	EM_239	Hyperlipidemia	Endocrine/Metab
V45.89	-2.77665	-5.64429	0.0909982	0.0577219	1	0	0.0577219	-1.8978	5.26953
I51.9	-7.52812	-15.3431	0.28684	0.0590179	1	0	0.0590179	-1.88806	14.2135	ICD10CM	Heart disease, unspecified	CV_426	Complications and ill-defined descriptions of heart disease	Cardiovascular
K76.0	-10.579	-21.6228	0.464765	0.0604475	1	0	0.0604475	-1.87752	19.8622	ICD10CM	Fatty (change of) liver, not elsewhere classified	GI_542.2	Fatty liver disease (FLD)	Gastrointestinal
R10.84	-10.579	-21.6228	0.464765	0.0604475	1	0	0.0604475	-1.87752	19.8622	ICD10CM	Generalized abdominal pain	GI_527	Abdominal pain	Gastrointestinal
K62.1	-10.579	-21.6228	0.464765	0.0604475	1	0	0.0604475	-1.87752	19.8622	ICD10CM	Rectal polyp	CA_136.42	Benign neoplasm of rectum and anus	Neoplasms
D05.12	6.00431	-0.389043	12.3977	0.0656609	1	0	0.0656609	1.84073	11.0523	ICD10CM	Intraductal carcinoma in situ of left breast	CA_105	Malignant neoplasm of the breast	Neoplasms
D05.12	6.00431	-0.389043	12.3977	0.0656609	1	0	0.0656609	1.84073	11.0523	ICD10CM	Intraductal carcinoma in situ of left breast	CA_130	Cancer (solid tumor, excluding BCC)	Neoplasms
373	-5.96457	-12.3449	0.415754	0.0669093	1	0	0.0669093	-1.83228	10.9288	ICD9CM	Blepharitis NOS	SO_360.4	Blepharitis	Sense organs
726.12	-10.1871	-21.2135	0.839326	0.070171	1	0	0.070171	-1.81081	18.4468	ICD9CM	Bicipital tenosynovitis	MS_721.1	Synovitis and tenosynovitis	Muscloskeletal
528	-7.19962	-15.0049	0.605643	0.0706197	1	0	0.0706197	-1.80792	13.0163	ICD9CM	Stomatitis and mucositis, unspecified	GI_507.1	Stomatitis	Gastrointestinal
427.31	3.84513	-0.341481	8.03173	0.0718397	1	0	0.0718397	1.80013	6.92174	ICD9CM	Atrial fibrillation	CV_416.21	Atrial fibrillation	Cardiovascular
995.91	-10.032	-21.0822	1.01825	0.0751756	1	0	0.0751756	-1.77939	17.8508	ICD9CM	Sepsis	ID_092.2	Sepsis	Infections
204.02	-10.032	-21.0822	1.01825	0.0751756	1	0	0.0751756	-1.77939	17.8508	ICD9CM	Lymphoid leukemia, acute in relapse	CA_120.2	Lymphoid	Neoplasms
204.02	-10.032	-21.0822	1.01825	0.0751756	1	0	0.0751756	-1.77939	17.8508	ICD9CM	Lymphoid leukemia, acute in relapse	CA_121.11	Acute lymphoid leukemia	Neoplasms
575.8	-10.032	-21.0822	1.01825	0.0751756	1	0	0.0751756	-1.77939	17.8508	ICD9CM	Other specified disorders of gallbladder	GI_550	Disorders of the gallbladder	Gastrointestinal
38.9	-10.032	-21.0822	1.01825	0.0751756	1	0	0.0751756	-1.77939	17.8508	ICD9CM	Septicemia NOS	ID_089.1	Bacterial infections	Infections
38.9	-10.032	-21.0822	1.01825	0.0751756	1	0	0.0751756	-1.77939	17.8508	ICD9CM	Septicemia NOS	ID_092.2	Sepsis	Infections
8.45	-10.032	-21.0822	1.01825	0.0751756	1	0	0.0751756	-1.77939	17.8508	ICD9CM	Intestinal infection due to clostridium difficile	ID_015.2	Clostridium difficile	Infections
8.45	-10.032	-21.0822	1.01825	0.0751756	1	0	0.0751756	-1.77939	17.8508	ICD9CM	Intestinal infection due to clostridium difficile	ID_089.1	Bacterial infections	Infections
8.45	-10.032	-21.0822	1.01825	0.0751756	1	0	0.0751756	-1.77939	17.8508	ICD9CM	Intestinal infection due to clostridium difficile	GI_526.12	Intestinal infection due to C. difficile	Gastrointestinal
785.5	-10.032	-21.0822	1.01825	0.0751756	1	0	0.0751756	-1.77939	17.8508	ICD9CM	Shock NOS	SS_810	Shock	Symptoms
569.82	-10.032	-21.0822	1.01825	0.0751756	1	0	0.0751756	-1.77939	17.8508	ICD9CM	Ulceration of intestine	GI_522.7	Ulceration of the lower GI tract	Gastrointestinal
785.52	-10.032	-21.0822	1.01825	0.0751756	1	0	0.0751756	-1.77939	17.8508	ICD9CM	Septic shock	ID_092.2	Sepsis	Infections
785.52	-10.032	-21.0822	1.01825	0.0751756	1	0	0.0751756	-1.77939	17.8508	ICD9CM	Septic shock	SS_810.1	Septic shock	Symptoms
524.69	-10.032	-21.0822	1.01825	0.0751756	1	0	0.0751756	-1.77939	17.8508	ICD9CM	Other specified temporomandibular joint disorders	MS_734.6	Temporomandibular joint disorders	Muscloskeletal
783.7	-10.032	-21.0822	1.01825	0.0751756	1	0	0.0751756	-1.77939	17.8508	ICD9CM	Adult failure to thrive	EM_230.7	Failure to thrive	Endocrine/Metab
576.1	-10.032	-21.0822	1.01825	0.0751756	1	0	0.0751756	-1.77939	17.8508	ICD9CM	Cholangitis	GI_552.1	Cholangitis	Gastrointestinal
289.5	-10.032	-21.0822	1.01825	0.0751756	1	0	0.0751756	-1.77939	17.8508	ICD9CM	Spleen disease NOS	BI_174	Diseases of spleen	Blood/Immune
289.59	-10.032	-21.0822	1.01825	0.0751756	1	0	0.0751756	-1.77939	17.8508	ICD9CM	Other diseases of spleen	BI_174	Diseases of spleen	Blood/Immune
789.1	-10.032	-21.0822	1.01825	0.0751756	1	0	0.0751756	-1.77939	17.8508	ICD9CM	Hepatomegaly	GI_546.3	Hepatomegaly	Gastrointestinal
535	-10.032	-21.0822	1.01825	0.0751756	1	0	0.0751756	-1.77939	17.8508	ICD9CM	Acute gastritis, without mention of hemorrhage	GI_522.91	Acute gastritis	Gastrointestinal
535.6	-10.032	-21.0822	1.01825	0.0751756	1	0	0.0751756	-1.77939	17.8508	ICD9CM	Duodenitis, without mention of hemorrhage	GI_522.8	Duodenitis	Gastrointestinal
716.8	-10.032	-21.0822	1.01825	0.0751756	1	0	0.0751756	-1.77939	17.8508	ICD9CM	Other specified arthropathy, site unspecified	MS_707	Other arthropathies	Muscloskeletal
V42.81	-10.032	-21.0822	1.01825	0.0751756	1	0	0.0751756	-1.77939	17.8508	ICD9CM	Bone marrow replaced by transplant	SS_847.7	Bone marrow transplant	Symptoms
426.82	-10.032	-21.0822	1.01825	0.0751756	1	0	0.0751756	-1.77939	17.8508	ICD9CM	Long QT syndrome	CV_416.6	Long QT syndrome	Cardiovascular
289.9	-10.032	-21.0822	1.01825	0.0751756	1	0	0.0751756	-1.77939	17.8508	ICD9CM	Blood disease NOS	BI_176	Other diseases of blood and blood-forming organs	Blood/Immune
995.92	-10.032	-21.0822	1.01825	0.0751756	1	0	0.0751756	-1.77939	17.8508	ICD9CM	Severe sepsis	ID_092.2	Sepsis	Infections
275.2	-10.032	-21.0822	1.01825	0.0751756	1	0	0.0751756	-1.77939	17.8508	ICD9CM	Disorders of magnesium metabolism	EM_247.4	Disorders of magnesium metabolism	Endocrine/Metab
276.9	-10.032	-21.0822	1.01825	0.0751756	1	0	0.0751756	-1.77939	17.8508	ICD9CM	Electrolyte and fluid disorders not elsewhere classified	EM_256	Disorders of fluid, electrolyte and acid-base balance	Endocrine/Metab
996.85	-10.032	-21.0822	1.01825	0.0751756	1	0	0.0751756	-1.77939	17.8508	ICD9CM	Complications of bone marrow transplant	SS_847.7	Bone marrow transplant	Symptoms
C82.08	9.91569	-1.11534	20.9467	0.0780988	1	0	0.0780988	1.76183	17.4697	ICD10CM	Follicular lymphoma grade I, lymph nodes of multiple sites	CA_120.21	Mature B-cell	Neoplasms
C82.08	9.91569	-1.11534	20.9467	0.0780988	1	0	0.0780988	1.76183	17.4697	ICD10CM	Follicular lymphoma grade I, lymph nodes of multiple sites	CA_122.21	Follicular lymphoma	Neoplasms
C85.15	9.91569	-1.11534	20.9467	0.0780988	1	0	0.0780988	1.76183	17.4697	ICD10CM	Unspecified B-cell lymphoma, lymph nodes of inguinal region and lower limb	CA_120.21	Mature B-cell	Neoplasms
C85.15	9.91569	-1.11534	20.9467	0.0780988	1	0	0.0780988	1.76183	17.4697	ICD10CM	Unspecified B-cell lymphoma, lymph nodes of inguinal region and lower limb	CA_122.2	Non-Hodgkin lymphoma	Neoplasms
C82.95	9.91569	-1.11534	20.9467	0.0780988	1	0	0.0780988	1.76183	17.4697	ICD10CM	Follicular lymphoma, unspecified, lymph nodes of inguinal region and lower limb	CA_120.21	Mature B-cell	Neoplasms
C82.95	9.91569	-1.11534	20.9467	0.0780988	1	0	0.0780988	1.76183	17.4697	ICD10CM	Follicular lymphoma, unspecified, lymph nodes of inguinal region and lower limb	CA_122.21	Follicular lymphoma	Neoplasms
C82.90	9.91569	-1.11534	20.9467	0.0780988	1	0	0.0780988	1.76183	17.4697	ICD10CM	Follicular lymphoma, unspecified, unspecified site	CA_120.21	Mature B-cell	Neoplasms
C82.90	9.91569	-1.11534	20.9467	0.0780988	1	0	0.0780988	1.76183	17.4697	ICD10CM	Follicular lymphoma, unspecified, unspecified site	CA_122.21	Follicular lymphoma	Neoplasms
C82.18	9.91569	-1.11534	20.9467	0.0780988	1	0	0.0780988	1.76183	17.4697	ICD10CM	Follicular lymphoma grade II, lymph nodes of multiple sites	CA_120.21	Mature B-cell	Neoplasms
C82.18	9.91569	-1.11534	20.9467	0.0780988	1	0	0.0780988	1.76183	17.4697	ICD10CM	Follicular lymphoma grade II, lymph nodes of multiple sites	CA_122.21	Follicular lymphoma	Neoplasms
C82.98	9.91569	-1.11534	20.9467	0.0780988	1	0	0.0780988	1.76183	17.4697	ICD10CM	Follicular lymphoma, unspecified, lymph nodes of multiple sites	CA_120.21	Mature B-cell	Neoplasms
C82.98	9.91569	-1.11534	20.9467	0.0780988	1	0	0.0780988	1.76183	17.4697	ICD10CM	Follicular lymphoma, unspecified, lymph nodes of multiple sites	CA_122.21	Follicular lymphoma	Neoplasms
R52	9.91569	-1.11534	20.9467	0.0780988	1	0	0.0780988	1.76183	17.4697	ICD10CM	Pain, unspecified	SS_809	Pain	Symptoms
C82.05	9.91569	-1.11534	20.9467	0.0780988	1	0	0.0780988	1.76183	17.4697	ICD10CM	Follicular lymphoma grade I, lymph nodes of inguinal region and lower limb	CA_120.21	Mature B-cell	Neoplasms
C82.05	9.91569	-1.11534	20.9467	0.0780988	1	0	0.0780988	1.76183	17.4697	ICD10CM	Follicular lymphoma grade I, lymph nodes of inguinal region and lower limb	CA_122.21	Follicular lymphoma	Neoplasms
791	5.70389	-0.677265	12.085	0.0797781	1	0	0.0797781	1.75197	9.99307	ICD9CM	Proteinuria	SS_830	Proteinuria	Symptoms
733	-2.13067	-4.51762	0.256275	0.0801935	1	0	0.0801935	-1.74956	3.72775	ICD9CM	Osteoporosis NOS	MS_726.1	Osteoporosis	Muscloskeletal
781	-6.96866	-14.7895	0.852144	0.0807343	1	0	0.0807343	-1.74644	12.1704	ICD9CM	Abnormal involuntary movements	NS_324.3	Abnormal involuntary movements	Neurological
362.35	-9.64508	-20.7091	1.41895	0.087519	1	0	0.087519	-1.70863	16.4799	ICD9CM	Central retinal vein occlusion	SO_374.9	Retinal occlusions	Sense organs
173.31	-9.59228	-20.6561	1.47151	0.0892597	1	0	0.0892597	-1.69932	16.3003	ICD9CM	Basal cell carcinoma of skin of other and unspecified parts of face	CA_103.21	Basal cell carcinoma	Neoplasms
R93.3	-9.53686	-20.5672	1.49344	0.0901462	1	0	0.0901462	-1.69463	16.1614	ICD10CM	Abnormal findings on diagnostic imaging of other parts of digestive tract	GI_558	Abnormal findings on diagnostic imaging of the digestive tract	Gastrointestinal
R80.9	-9.53686	-20.5672	1.49344	0.0901462	1	0	0.0901462	-1.69463	16.1614	ICD10CM	Proteinuria, unspecified	SS_830	Proteinuria	Symptoms
R13.19	-9.53686	-20.5672	1.49344	0.0901462	1	0	0.0901462	-1.69463	16.1614	ICD10CM	Other dysphagia	GI_512	Aphagia and dysphagia	Gastrointestinal
R10.32	-9.53686	-20.5672	1.49344	0.0901462	1	0	0.0901462	-1.69463	16.1614	ICD10CM	Left lower quadrant pain	GI_527	Abdominal pain	Gastrointestinal
J30.81	-9.53686	-20.5672	1.49344	0.0901462	1	0	0.0901462	-1.69463	16.1614	ICD10CM	Allergic rhinitis due to animal (cat) (dog) hair and dander	RE_463.23	Allergic rhinitis, due to animal hair and dander	Respiratory
J30.81	-9.53686	-20.5672	1.49344	0.0901462	1	0	0.0901462	-1.69463	16.1614	ICD10CM	Allergic rhinitis due to animal (cat) (dog) hair and dander	SS_840.8	Allergies related to other diseases/symptoms	Symptoms
E11.8	-9.53686	-20.5672	1.49344	0.0901462	1	0	0.0901462	-1.69463	16.1614	ICD10CM	Type 2 diabetes mellitus with unspecified complications	EM_202.2	Type 2 diabetes	Endocrine/Metab
M25.761	-9.53686	-20.5672	1.49344	0.0901462	1	0	0.0901462	-1.69463	16.1614	ICD10CM	Osteophyte, right knee	MS_724.52	Osteophyte*	Muscloskeletal
E11.69	-9.53686	-20.5672	1.49344	0.0901462	1	0	0.0901462	-1.69463	16.1614	ICD10CM	Type 2 diabetes mellitus with other specified complication	EM_202.2	Type 2 diabetes	Endocrine/Metab
G56.03	-9.53686	-20.5672	1.49344	0.0901462	1	0	0.0901462	-1.69463	16.1614	ICD10CM	Carpal tunnel syndrome, bilateral upper limbs	NS_336.411	Carpal tunnel syndrome, bilateral*	Neurological
R13.10	-9.53686	-20.5672	1.49344	0.0901462	1	0	0.0901462	-1.69463	16.1614	ICD10CM	Dysphagia, unspecified	GI_512	Aphagia and dysphagia	Gastrointestinal
359.6	-9.57126	-20.6538	1.51123	0.0905067	1	0	0.0905067	-1.69273	16.2016	ICD9CM	Symptomatic inflammatory myopathy in diseases classified elsewhere	NS_340	Myopathies	Neurological
787.29	-9.57126	-20.6538	1.51123	0.0905067	1	0	0.0905067	-1.69273	16.2016	ICD9CM	Other dysphagia	GI_512	Aphagia and dysphagia	Gastrointestinal
697	-9.57126	-20.6538	1.51123	0.0905067	1	0	0.0905067	-1.69273	16.2016	ICD9CM	Lichen planus	DE_664.1	Lichen planus, nitidus, or striatus	Dermatological
533.9	5.51173	-0.872067	11.8955	0.090598	1	0	0.090598	1.69225	9.32724	ICD9CM	Peptic ulcer of unspecified site, unspecified as acute or chronic, without mention of hemorrhage or perforation, without mention of obstruction	GI_513	Peptic ulcer	Gastrointestinal
733	-9.54763	-20.6107	1.51547	0.0907392	1	0	0.0907392	-1.69151	16.1499	ICD9CM	Osteoporosis	MS_726.1	Osteoporosis	Muscloskeletal
K52.9	9.5041	-1.53805	20.5462	0.0916047	1	0	0.0916047	1.68699	16.0333	ICD10CM	Noninfective gastroenteritis and colitis, unspecified	GI_522	Gastrointestinal inflammation	Gastrointestinal
K52.89	9.5041	-1.53805	20.5462	0.0916047	1	0	0.0916047	1.68699	16.0333	ICD10CM	Other specified noninfective gastroenteritis and colitis	GI_522	Gastrointestinal inflammation	Gastrointestinal
K50.919	9.5041	-1.53805	20.5462	0.0916047	1	0	0.0916047	1.68699	16.0333	ICD10CM	Crohn's disease, unspecified, with unspecified complications	BI_181	Autoimmune disease	Blood/Immune
K50.919	9.5041	-1.53805	20.5462	0.0916047	1	0	0.0916047	1.68699	16.0333	ICD10CM	Crohn's disease, unspecified, with unspecified complications	GI_522.11	Crohn's disease	Gastrointestinal
K29.80	9.5041	-1.53805	20.5462	0.0916047	1	0	0.0916047	1.68699	16.0333	ICD10CM	Duodenitis without bleeding	GI_522.8	Duodenitis	Gastrointestinal
280.9	-3.17181	-6.8653	0.521675	0.092343	1	0	0.092343	-1.68317	5.33869	ICD9CM	Iron deficiency anemia, unspecified	BI_160.1	Iron deficiency anemia	Blood/Immune
280.9	-3.17181	-6.8653	0.521675	0.092343	1	0	0.092343	-1.68317	5.33869	ICD9CM	Iron deficiency anemia, unspecified	BI_164.1	Microcytic anemia	Blood/Immune
280.9	-3.17181	-6.8653	0.521675	0.092343	1	0	0.092343	-1.68317	5.33869	ICD9CM	Iron deficiency anemia, unspecified	EM_247.88	Iron deficiency	Endocrine/Metab
241.9	-6.66977	-14.4791	1.13951	0.0941301	1	0	0.0941301	-1.674	11.1652	ICD9CM	Unspecified nontoxic nodular goiter	EM_200.2	Goiter	Endocrine/Metab
379.21	-6.686	-14.5151	1.14306	0.0941628	1	0	0.0941628	-1.67384	11.1913	ICD9CM	Vitreous degeneration	SO_376.1	Vitreous degeneration	Sense organs
R07.2	-9.33591	-20.3665	1.69467	0.0971404	1	0	0.0971404	-1.65888	15.4871	ICD10CM	Precordial pain	SS_800.2	Precordial pain	Symptoms
C77.2	-9.33591	-20.3665	1.69467	0.0971404	1	0	0.0971404	-1.65888	15.4871	ICD10CM	Secondary and unspecified malignant neoplasm of intra-abdominal lymph nodes	CA_116	Secondary malignant neoplasm	Neoplasms
C78.7	-9.33591	-20.3665	1.69467	0.0971404	1	0	0.0971404	-1.65888	15.4871	ICD10CM	Secondary malignant neoplasm of liver and intrahepatic bile duct	CA_116	Secondary malignant neoplasm	Neoplasms
C22.8	-9.33591	-20.3665	1.69467	0.0971404	1	0	0.0971404	-1.65888	15.4871	ICD10CM	Malignant neoplasm of liver, primary, unspecified as to type	CA_101.61	Malignant neoplasm of the liver	Neoplasms
C22.8	-9.33591	-20.3665	1.69467	0.0971404	1	0	0.0971404	-1.65888	15.4871	ICD10CM	Malignant neoplasm of liver, primary, unspecified as to type	CA_130	Cancer (solid tumor, excluding BCC)	Neoplasms
R17	-9.33591	-20.3665	1.69467	0.0971404	1	0	0.0971404	-1.65888	15.4871	ICD10CM	Unspecified jaundice	SS_814	Jaundice	Symptoms
D63.0	-9.33591	-20.3665	1.69467	0.0971404	1	0	0.0971404	-1.65888	15.4871	ICD10CM	Anemia in neoplastic disease	CA_132	Sequelae of cancer	Neoplasms
D63.0	-9.33591	-20.3665	1.69467	0.0971404	1	0	0.0971404	-1.65888	15.4871	ICD10CM	Anemia in neoplastic disease	BI_164.6	Anemia secondary to chronic diseases and conditions	Blood/Immune
N83.8	-9.33591	-20.3665	1.69467	0.0971404	1	0	0.0971404	-1.65888	15.4871	ICD10CM	Other noninflammatory disorders of ovary, fallopian tube and broad ligament	GU_619	Noninflammatory disorders of ovary, fallopian tube, and broad ligament	Genitourinary
R18.8	-9.33591	-20.3665	1.69467	0.0971404	1	0	0.0971404	-1.65888	15.4871	ICD10CM	Other ascites	GI_555	Ascites	Gastrointestinal
N83.9	-9.33591	-20.3665	1.69467	0.0971404	1	0	0.0971404	-1.65888	15.4871	ICD10CM	Noninflammatory disorder of ovary, fallopian tube and broad ligament, unspecified	GU_619	Noninflammatory disorders of ovary, fallopian tube, and broad ligament	Genitourinary
J45.909	6.48188	-1.32387	14.2876	0.103614	1	0	0.103614	1.62758	10.5498	ICD10CM	Unspecified asthma, uncomplicated	RE_475	Asthma	Respiratory
204	-6.47766	-14.296	1.34065	0.104395	1	0	0.104395	-1.62391	10.5191	ICD9CM	Acute lymphoid leukemia without mention of having achieved remission	CA_120.2	Lymphoid	Neoplasms
204	-6.47766	-14.296	1.34065	0.104395	1	0	0.104395	-1.62391	10.5191	ICD9CM	Acute lymphoid leukemia without mention of having achieved remission	CA_121.11	Acute lymphoid leukemia	Neoplasms
205	-6.47766	-14.296	1.34065	0.104395	1	0	0.104395	-1.62391	10.5191	ICD9CM	Acute myeloid leukemia without mention of having achieved remission	CA_120.1	Myeloid	Neoplasms
205	-6.47766	-14.296	1.34065	0.104395	1	0	0.104395	-1.62391	10.5191	ICD9CM	Acute myeloid leukemia without mention of having achieved remission	CA_121.12	Acute myeloid leukemia	Neoplasms
208.9	-6.47766	-14.296	1.34065	0.104395	1	0	0.104395	-1.62391	10.5191	ICD9CM	Unspecified leukemia without mention of having achieved remission	CA_120	Hemo onc - by cell of origin	Neoplasms
208.9	-6.47766	-14.296	1.34065	0.104395	1	0	0.104395	-1.62391	10.5191	ICD9CM	Unspecified leukemia without mention of having achieved remission	CA_121	Leukemia	Neoplasms
208	-6.47766	-14.296	1.34065	0.104395	1	0	0.104395	-1.62391	10.5191	ICD9CM	Acute leukemia of unspecified cell type without mention of having achieved remission	CA_120	Hemo onc - by cell of origin	Neoplasms
208	-6.47766	-14.296	1.34065	0.104395	1	0	0.104395	-1.62391	10.5191	ICD9CM	Acute leukemia of unspecified cell type without mention of having achieved remission	CA_121.1	Acute leukemia	Neoplasms
G89.18	-5.2679	-11.6499	1.1141	0.105696	1	0	0.105696	-1.61784	8.52265	ICD10CM	Other acute postprocedural pain	SS_809.1	Acute pain	Symptoms
227	-9.09439	-20.127	1.93827	0.106168	1	0	0.106168	-1.61566	14.6934	ICD9CM	Benign neoplasm of adrenal gland	CA_114.6	Pheochromocytoma	Neoplasms
571.2	-9.05998	-20.0933	1.97333	0.107518	1	0	0.107518	-1.60945	14.5816	ICD9CM	Alcoholic cirrhosis of liver	MB_280.13	Alcoholic liver disease	Mental
571.2	-9.05998	-20.0933	1.97333	0.107518	1	0	0.107518	-1.60945	14.5816	ICD9CM	Alcoholic cirrhosis of liver	GI_542.11	Cirrhosis of liver	Gastrointestinal
374.87	-9.04755	-20.0901	1.995	0.108297	1	0	0.108297	-1.6059	14.5294	ICD9CM	Dermatochalasis	SO_362.6	Dermatochalasis of eyelid	Sense organs
401.9	-1.2296	-2.73466	0.275456	0.109315	1	0	0.109315	-1.60128	1.96893	ICD9CM	Hypertension NOS	CV_401.1	Essential hypertension	Cardiovascular
327.23	2.79906	-0.709215	6.30733	0.11787	1	0	0.11787	1.56378	4.3771	ICD9CM	Obstructive sleep apnea	NS_333.11	Obstructive sleep apnea	Neurological
79.99	-5.02627	-11.4033	1.35077	0.122386	1	0	0.122386	-1.54484	7.76476	ICD9CM	Unspecified viral infection in conditions classified elsewhere and of unspecified site	ID_089.2	Viral infections	Infections
784.2	-4.33007	-9.86082	1.20067	0.124906	1	0	0.124906	-1.5345	6.6445	ICD9CM	Swelling, mass, or lump in head and neck	DE_681	Localized swelling, mass and lump of skin and subcutaneous tissue	Dermatological
715.36	-4.98659	-11.3653	1.39212	0.125463	1	0	0.125463	-1.53224	7.64067	ICD9CM	Osteoarthrosis, localized, not specified whether primary or secondary, involving lower leg	MS_708	Osteoarthritis	Muscloskeletal
702.19	1.95269	1.5993	2.30608	2.48103e-27	2	0	2.48103e-27	10.83	21.1477	ICD9CM	Other seborrheic keratosis	DE_670	Seborrheic keratosis	Dermatological
738	-8.60543	-19.6533	2.44246	0.12684	1	0	0.12684	-1.52668	13.1378	ICD9CM	Acquired deformity of nose	MS_729	Other acquired musculoskeletal deformity	Muscloskeletal
795	-0.93219	-1.50251	-0.361873	0.00135729	2	20.8463	0.00135729	-3.20358	2.98635	ICD9CM	Abnormal glandular Papanicolaou smear of cervix	SS_834.1	Abnormal Papanicolaou smear	Symptoms
625.8	-1.14918	-1.79281	-0.505559	0.000466139	2	5.00857	0.000466139	-3.4995	4.02156	ICD9CM	Other specified symptoms associated with female genital organs	GU_625	Pain and other symptoms associated with female genital organs	Genitourinary
E11.65	-6.0386	-13.8669	1.7897	0.130558	1	0	0.130558	-1.51191	9.12979	ICD10CM	Type 2 diabetes mellitus with hyperglycemia	EM_202.2	Type 2 diabetes	Endocrine/Metab
E11.65	-6.0386	-13.8669	1.7897	0.130558	1	0	0.130558	-1.51191	9.12979	ICD10CM	Type 2 diabetes mellitus with hyperglycemia	EM_204.4	Hyperglycemia	Endocrine/Metab
787.01	-1.2292	-1.57296	-0.885454	2.40782e-12	4	0	2.40782e-12	-7.00856	8.61496	ICD9CM	Nausea with vomiting	GI_528.1	Nausea	Gastrointestinal
787.01	-1.2292	-1.57296	-0.885454	2.40782e-12	4	0	2.40782e-12	-7.00856	8.61496	ICD9CM	Nausea with vomiting	GI_528.2	Vomiting	Gastrointestinal
787.01	-1.2292	-1.57296	-0.885454	2.40782e-12	4	0	2.40782e-12	-7.00856	8.61496	ICD9CM	Nausea with vomiting	GI_528.1	Nausea	Gastrointestinal
787.01	-1.2292	-1.57296	-0.885454	2.40782e-12	4	0	2.40782e-12	-7.00856	8.61496	ICD9CM	Nausea with vomiting	GI_528.2	Vomiting	Gastrointestinal
244.1	-8.43098	-19.4886	2.62666	0.135067	1	0	0.135067	-1.49442	12.5994	ICD9CM	Other postablative hypothyroidism	EM_200.11	Secondary hypothyroidism	Endocrine/Metab
250.6	-8.43098	-19.4886	2.62666	0.135067	1	0	0.135067	-1.49442	12.5994	ICD9CM	Diabetes mellitus type II [non-insulin dependent type] [NIDDM type] [adult-onset type] or unspecified type, not stated as uncontrolled, with neurological manifestations	EM_202.2	Type 2 diabetes	Endocrine/Metab
413.1	-8.43098	-19.4886	2.62666	0.135067	1	0	0.135067	-1.49442	12.5994	ICD9CM	Prinzmetal angina	CV_403	Angina pectoris	Cardiovascular
786.5	-1.73953	-4.02326	0.544208	0.135454	1	0	0.135454	-1.49294	2.597	ICD9CM	Unspecified chest pain	SS_800	Chest pain	Symptoms
228	-5.92316	-13.7273	1.88096	0.136857	1	0	0.136857	-1.4876	8.81129	ICD9CM	Hemangioma NOS	CA_139.61	Hemangioma	Neoplasms
D70.9	-5.9094	-13.7193	1.9005	0.138063	1	0	0.138063	-1.48304	8.76391	ICD10CM	Neutropenia, unspecified	BI_170.1	Neutropenia	Blood/Immune
622.1	5.89185	-1.92096	13.7047	0.139384	1	0	0.139384	1.47809	8.70867	ICD9CM	Dysplasia of cervix NOS	GU_621.1	Dysplasia of cervix	Genitourinary
840.9	-5.94593	-13.8585	1.96659	0.140789	1	0	0.140789	-1.47286	8.75752	ICD9CM	Sprain of unspecified site of shoulder and upper arm	MS_741.1	Sprains and strains of shoulder and upper arm	Muscloskeletal
153.9	-3.71718	-8.67018	1.23582	0.141302	1	0	0.141302	-1.47096	5.46782	ICD9CM	Malignant neoplasm of colon, unspecified	CA_101.411	Malignant neoplasm of colon	Neoplasms
153.9	-3.71718	-8.67018	1.23582	0.141302	1	0	0.141302	-1.47096	5.46782	ICD9CM	Malignant neoplasm of colon, unspecified	CA_130	Cancer (solid tumor, excluding BCC)	Neoplasms
424.9	8.28083	-2.7609	19.3226	0.141584	1	0	0.141584	1.46992	12.1721	ICD9CM	Endocarditis valve unspecified cause	CV_410.2	Endocarditis	Cardiovascular
441.7	8.28083	-2.7609	19.3226	0.141584	1	0	0.141584	1.46992	12.1721	ICD9CM	Thoracoabdominal aortic aneurysm, without mention of rupture	CV_438.13	Thoracoabdominal aortic aneurysm	Cardiovascular
625	-1.79058	-2.46261	-1.11855	1.76833e-07	2	24.3606	1.76833e-07	-5.22218	9.35073	ICD9CM	Dyspareunia	GU_625.1	Dyspareunia	Genitourinary
428.1	-8.25891	-19.3055	2.78766	0.142816	1	0	0.142816	-1.46538	12.1025	ICD9CM	Left heart failure	CV_424.1	Left heart failure	Cardiovascular
518.84	-8.25891	-19.3055	2.78766	0.142816	1	0	0.142816	-1.46538	12.1025	ICD9CM	Acute and chronic respiratory failure	RE_479.3	Respiratory failure	Respiratory
715.12	8.16441	-2.8821	19.2109	0.147443	1	0	0.147443	1.44862	11.8272	ICD9CM	Osteoarthrosis, localized, primary, involving upper arm	MS_708	Osteoarthritis	Muscloskeletal
280	8.16441	-2.8821	19.2109	0.147443	1	0	0.147443	1.44862	11.8272	ICD9CM	Iron deficiency anemia secondary to blood loss (chronic)	BI_160.11	Iron deficiency anemia secondary to blood loss	Blood/Immune
280	8.16441	-2.8821	19.2109	0.147443	1	0	0.147443	1.44862	11.8272	ICD9CM	Iron deficiency anemia secondary to blood loss (chronic)	BI_164.1	Microcytic anemia	Blood/Immune
280	8.16441	-2.8821	19.2109	0.147443	1	0	0.147443	1.44862	11.8272	ICD9CM	Iron deficiency anemia secondary to blood loss (chronic)	EM_247.88	Iron deficiency	Endocrine/Metab
200.7	8.14058	-2.89398	19.1751	0.148188	1	0	0.148188	1.44596	11.771	ICD9CM	Large cell lymphoma, unspecified site, extranodal and solid organ sites	CA_120.2	Lymphoid	Neoplasms
200.7	8.14058	-2.89398	19.1751	0.148188	1	0	0.148188	1.44596	11.771	ICD9CM	Large cell lymphoma, unspecified site, extranodal and solid organ sites	CA_122.2	Non-Hodgkin lymphoma	Neoplasms
200.72	8.14058	-2.89398	19.1751	0.148188	1	0	0.148188	1.44596	11.771	ICD9CM	Large cell lymphoma involving intrathoracic lymph nodes	CA_120.2	Lymphoid	Neoplasms
200.72	8.14058	-2.89398	19.1751	0.148188	1	0	0.148188	1.44596	11.771	ICD9CM	Large cell lymphoma involving intrathoracic lymph nodes	CA_122.2	Non-Hodgkin lymphoma	Neoplasms
478.3	8.14058	-2.89398	19.1751	0.148188	1	0	0.148188	1.44596	11.771	ICD9CM	Vocal cord paralysis NOS	RE_472.1	Paralysis of vocal cords and larynx	Respiratory
R94.39	-8.15298	-19.2227	2.91677	0.148863	1	0	0.148863	-1.44356	11.7693	ICD10CM	Abnormal result of other cardiovascular function study	CV_418	Abnormal results of cardiovascular function studies	Cardiovascular
V15.09	-4.06433	-9.59767	1.46901	0.149966	1	0	0.149966	-1.43965	5.85121	ICD9CM	Other allergy, other than to medicinal agents	SS_840	Allergy	Symptoms
424.1	2.45602	-0.894164	5.80621	0.150753	1	0	0.150753	1.43688	3.529	ICD9CM	Aortic valve disorders	CV_413.2	Aortic valve disorders	Cardiovascular
794.6	8.09076	-2.95672	19.1382	0.151164	1	0	0.151164	1.43543	11.6137	ICD9CM	Nonspecific abnormal results of other endocrine function study	EM_228	Abnormal results of endocrine function studies (excluding thyroid)	Endocrine/Metab
E03.9	-4.67383	-11.0625	1.7148	0.151598	1	0	0.151598	-1.43391	6.70185	ICD10CM	Hypothyroidism, unspecified	EM_200.12	Hypothyroidism (not specified as secondary)	Endocrine/Metab
556	8.02989	-3.03108	19.0908	0.154767	1	0	0.154767	1.42289	11.4257	ICD9CM	Ulcerative (chronic) enterocolitis	BI_181	Autoimmune disease	Blood/Immune
556	8.02989	-3.03108	19.0908	0.154767	1	0	0.154767	1.42289	11.4257	ICD9CM	Ulcerative (chronic) enterocolitis	GI_522.12	Ulcerative colitis	Gastrointestinal
220	8.02989	-3.03108	19.0908	0.154767	1	0	0.154767	1.42289	11.4257	ICD9CM	Benign neoplasm of ovary	CA_144.3	Benign neoplasms of the ovary	Neoplasms
617.1	8.02989	-3.03108	19.0908	0.154767	1	0	0.154767	1.42289	11.4257	ICD9CM	Endometriosis of ovary	GU_615	Endometriosis	Genitourinary
757.39	3.05599	-1.16444	7.27642	0.155833	1	0	0.155833	1.41923	4.33714	ICD9CM	Other specified congenital anomalies of skin	CM_771.1	Congenital malformation of the skin	Congenital
C50.919	-0.909652	-1.34127	-0.478034	3.61661e-05	4	0	3.61661e-05	-4.1307	3.7575	ICD10CM	Malignant neoplasm of unspecified site of unspecified female breast	CA_105.1	Malignant neoplasm of the breast, female	Neoplasms
C50.919	-0.909652	-1.34127	-0.478034	3.61661e-05	4	0	3.61661e-05	-4.1307	3.7575	ICD10CM	Malignant neoplasm of unspecified site of unspecified female breast	CA_130	Cancer (solid tumor, excluding BCC)	Neoplasms
C50.919	-0.909652	-1.34127	-0.478034	3.61661e-05	4	0	3.61661e-05	-4.1307	3.7575	ICD10CM	Malignant neoplasm of unspecified site of unspecified female breast	CA_105.1	Malignant neoplasm of the breast, female	Neoplasms
C50.919	-0.909652	-1.34127	-0.478034	3.61661e-05	4	0	3.61661e-05	-4.1307	3.7575	ICD10CM	Malignant neoplasm of unspecified site of unspecified female breast	CA_130	Cancer (solid tumor, excluding BCC)	Neoplasms
719.47	-4.55236	-10.933	1.82832	0.161998	1	0	0.161998	-1.39838	6.36593	ICD9CM	Pain in joint involving ankle and foot	MS_713.38	Pain in ankle and joints of foot	Muscloskeletal
333.99	-5.56666	-13.3788	2.24543	0.162523	1	0	0.162523	-1.39664	7.77461	ICD9CM	Other extrapyramidal diseases and abnormal movement disorders	NS_324	Extrapyramidal and movement disorders	Neurological
345.5	-5.55221	-13.3582	2.25377	0.163287	1	0	0.163287	-1.3941	7.74035	ICD9CM	Partial epilepsy without impairment of consciousness without intractable epilepsy	NS_330.12	Partial epilepsy	Neurological
719.4	-2.19507	-5.29338	0.903237	0.164951	1	0	0.164951	-1.38861	3.0481	ICD9CM	Pain in joint site unspecified	MS_713.3	Pain in joint	Muscloskeletal
623.8	-0.959878	-1.38529	-0.534468	9.76199e-06	2	8.4675	9.76199e-06	-4.42238	4.24494	ICD9CM	Other specified noninflammatory disorders of vagina	GU_618	Noninflammatory disorders of vagina	Genitourinary
M22.2X1	-7.77179	-18.8266	3.28301	0.168226	1	0	0.168226	-1.37793	10.709	ICD10CM	Patellofemoral disorders, right knee	MS_711	Disorder of patella	Muscloskeletal
M22.2X2	-7.77179	-18.8266	3.28301	0.168226	1	0	0.168226	-1.37793	10.709	ICD10CM	Patellofemoral disorders, left knee	MS_711	Disorder of patella	Muscloskeletal
211.2	-7.72926	-18.7718	3.31327	0.170092	1	0	0.170092	-1.37191	10.6038	ICD9CM	Benign neoplasm of duodenum, jejunum, and ileum	CA_136.3	Benign neoplasm of the small intestine	Neoplasms
427.81	-7.71475	-18.7514	3.3219	0.170667	1	0	0.170667	-1.37006	10.5697	ICD9CM	Sinoatrial node dysfunction	CV_416.7	Sinoatrial node dysfunction	Cardiovascular
702.11	2.01379	1.53789	2.4897	1.09873e-16	2	0	1.09873e-16	8.2936	16.7016	ICD9CM	Inflamed seborrheic keratosis	DE_670	Seborrheic keratosis	Dermatological
710.2	-5.43561	-13.2812	2.40996	0.174484	1	0	0.174484	-1.35794	7.38121	ICD9CM	Sicca syndrome	BI_181	Autoimmune disease	Blood/Immune
710.2	-5.43561	-13.2812	2.40996	0.174484	1	0	0.174484	-1.35794	7.38121	ICD9CM	Sicca syndrome	SO_367.8	Hypopyon	Sense organs
710.2	-5.43561	-13.2812	2.40996	0.174484	1	0	0.174484	-1.35794	7.38121	ICD9CM	Sicca syndrome	MS_700.2	Sicca syndrome [Sjogren syndrome]	Muscloskeletal
288.6	-4.40278	-10.783	1.97745	0.176206	1	0	0.176206	-1.35253	5.95488	ICD9CM	Leukocytosis NOS	BI_171	Elevated white blood cell count [Leukocytosis]	Blood/Immune
715.89	-7.60975	-18.6676	3.44815	0.177395	1	0	0.177395	-1.34882	10.2642	ICD9CM	Osteoarthrosis involving or with mention of multiple sites, but not specified as generalized	MS_708.1	Osteoarthritis of more than one site	Muscloskeletal
724.03	7.58321	-3.46565	18.6321	0.178556	1	0	0.178556	1.34522	10.2011	ICD9CM	Spinal stenosis, lumbar region, with neurogenic claudication	MS_715.4	Spinal stenosis	Muscloskeletal
724.02	7.58321	-3.46565	18.6321	0.178556	1	0	0.178556	1.34522	10.2011	ICD9CM	Spinal stenosis of lumbar region	MS_715.4	Spinal stenosis	Muscloskeletal
D25.9	3.77405	-1.7608	9.3089	0.181398	1	0	0.181398	1.33646	5.04388	ICD10CM	Leiomyoma of uterus, unspecified	CA_144.21	Leiomyoma of uterus	Neoplasms
V49.81	4.34427	-2.03441	10.723	0.181916	1	0	0.181916	1.33488	5.79908
704.09	-5.31868	-13.1305	2.49309	0.182048	1	0	0.182048	-1.33447	7.09764	ICD9CM	Other alopecia	DE_684.1	Alopecia	Dermatological
793.99	-7.4957	-18.5345	3.54314	0.183223	1	0	0.183223	-1.3309	9.97601	ICD9CM	Other nonspecific abnormal findings on radiological and other examinations of body structure	SS_819	General symptoms and other findings	Symptoms
789.69	-7.4957	-18.5345	3.54314	0.183223	1	0	0.183223	-1.3309	9.97601	ICD9CM	Abdominal tenderness, other specified site; multiple sites	GI_527.2	Abdominal tenderness	Gastrointestinal
477.1	-7.4957	-18.5345	3.54314	0.183223	1	0	0.183223	-1.3309	9.97601	ICD9CM	Allergic rhinitis due to food	RE_463.22	Allergic rhinitis due to food	Respiratory
477.1	-7.4957	-18.5345	3.54314	0.183223	1	0	0.183223	-1.3309	9.97601	ICD9CM	Allergic rhinitis due to food	SS_840.1	Food allergy	Symptoms
447.9	-7.4957	-18.5345	3.54314	0.183223	1	0	0.183223	-1.3309	9.97601	ICD9CM	Unspecified disorders of arteries and arterioles	CV_443	Other disorders of arteries and arterioles	Cardiovascular
708.3	-7.4957	-18.5345	3.54314	0.183223	1	0	0.183223	-1.3309	9.97601	ICD9CM	Dermatographic urticaria	DE_666.4	Dermatographic urticaria	Dermatological
708	-7.4957	-18.5345	3.54314	0.183223	1	0	0.183223	-1.3309	9.97601	ICD9CM	Allergic urticaria	DE_666.1	Allergic urticaria	Dermatological
708	-7.4957	-18.5345	3.54314	0.183223	1	0	0.183223	-1.3309	9.97601	ICD9CM	Allergic urticaria	SS_840.8	Allergies related to other diseases/symptoms	Symptoms
995	-7.4957	-18.5345	3.54314	0.183223	1	0	0.183223	-1.3309	9.97601	ICD9CM	Other anaphylactic reaction	SS_840.9	Anaphylactic reaction	Symptoms
250	-1.69656	-4.20404	0.810917	0.184794	1	0	0.184794	-1.32614	2.24987	ICD9CM	Diabetes mellitus without mention of complication, type II or unspecified type, not stated as uncontrolled	EM_202.2	Type 2 diabetes	Endocrine/Metab
621.8	5.26962	-2.56029	13.0995	0.187135	1	0	0.187135	1.3191	6.95117	ICD9CM	Other specified disorders of uterus, not elsewhere classified	GU_616	Disorders of uterus, except cervix	Genitourinary
345.4	7.41101	-3.6257	18.4477	0.188135	1	0	0.188135	1.31612	9.75375	ICD9CM	Partial epilepsy without intractable epilepsy	NS_330.12	Partial epilepsy	Neurological
571.5	-3.70926	-9.23992	1.82139	0.188671	1	0	0.188671	-1.31452	4.87591	ICD9CM	Cirrhosis of liver without mention of alcohol	GI_542.11	Cirrhosis of liver	Gastrointestinal
571.5	-3.70926	-9.23992	1.82139	0.188671	1	0	0.188671	-1.31452	4.87591	ICD9CM	Cirrhosis of liver without mention of alcohol	GI_542.7	Chronic nonalcoholic liver disease	Gastrointestinal
590.8	5.24153	-2.5741	13.0572	0.188689	1	0	0.188689	1.31447	6.88982	ICD9CM	Pyelonephritis NOS	GU_581.1	Acute pyelonephritis	Genitourinary
620.8	-4.24951	-10.6262	2.12719	0.191496	1	0	0.191496	-1.30617	5.55056	ICD9CM	Other noninflammatory disorders of ovary, fallopian tube, and broad ligament	GU_619	Noninflammatory disorders of ovary, fallopian tube, and broad ligament	Genitourinary
786.09	2.78594	-1.40241	6.9743	0.192329	1	0	0.192329	1.30372	3.63209	ICD9CM	Other dyspnea and respiratory abnormality	RE_488	Abnormalities of breathing	Respiratory
427.61	7.34197	-3.71008	18.394	0.192901	1	0	0.192901	1.30204	9.55956	ICD9CM	Supraventricular premature beats	CV_416.51	Atrial premature depolarization [Supraventricular premature beats]	Cardiovascular
794.3	7.34197	-3.71008	18.394	0.192901	1	0	0.192901	1.30204	9.55956	ICD9CM	Nonspecific abnormal function study, cardiovascular, unspecified	CV_418	Abnormal results of cardiovascular function studies	Cardiovascular
R10.11	0.18493	-0.471024	0.840883	0.580563	2	35.6702	0.580563	0.552563	0.102185	ICD10CM	Right upper quadrant pain	GI_527	Abdominal pain	Gastrointestinal
555	-5.14262	-12.9755	2.69026	0.198155	1	0	0.198155	-1.28682	6.61765	ICD9CM	Regional enteritis of small intestine	BI_181	Autoimmune disease	Blood/Immune
555	-5.14262	-12.9755	2.69026	0.198155	1	0	0.198155	-1.28682	6.61765	ICD9CM	Regional enteritis of small intestine	GI_522.11	Crohn's disease	Gastrointestinal
J45.21	7.25303	-3.80633	18.3124	0.198645	1	0	0.198645	1.28542	9.3232	ICD10CM	Mild intermittent asthma with (acute) exacerbation	RE_475	Asthma	Respiratory
D72.829	7.25303	-3.80633	18.3124	0.198645	1	0	0.198645	1.28542	9.3232	ICD10CM	Elevated white blood cell count, unspecified	BI_171	Elevated white blood cell count [Leukocytosis]	Blood/Immune
M85.80	7.25303	-3.80633	18.3124	0.198645	1	0	0.198645	1.28542	9.3232	ICD10CM	Other specified disorders of bone density and structure, unspecified site	MS_727	Other disorders of bone	Muscloskeletal
M94.9	7.25303	-3.80633	18.3124	0.198645	1	0	0.198645	1.28542	9.3232	ICD10CM	Disorder of cartilage, unspecified	MS_728	Chondropathies	Muscloskeletal
N60.11	5.0749	-2.73577	12.8856	0.202845	1	0	0.202845	1.27349	6.46283	ICD10CM	Diffuse cystic mastopathy of right breast	GU_610.1	Cystic mastopathy	Genitourinary
C50.411	5.0749	-2.73577	12.8856	0.202845	1	0	0.202845	1.27349	6.46283	ICD10CM	Malignant neoplasm of upper-outer quadrant of right female breast	CA_105.1	Malignant neoplasm of the breast, female	Neoplasms
C50.411	5.0749	-2.73577	12.8856	0.202845	1	0	0.202845	1.27349	6.46283	ICD10CM	Malignant neoplasm of upper-outer quadrant of right female breast	CA_130	Cancer (solid tumor, excluding BCC)	Neoplasms
737.39	4.13859	-2.24031	10.5175	0.203503	1	0	0.203503	1.27163	5.26277	ICD9CM	Other kyphoscoliosis and scoliosis	MS_714.3	Scoliosis	Muscloskeletal
R00.0	-3.20611	-8.16196	1.74973	0.2048	1	0	0.2048	-1.26799	4.06533	ICD10CM	Tachycardia, unspecified	CV_417.2	Tachycardia	Cardiovascular
N94.10	5.03528	-2.7762	12.8468	0.20644	1	0	0.20644	1.26342	6.36165	ICD10CM	Unspecified dyspareunia	GU_625.1	Dyspareunia	Genitourinary
473.9	1.91381	-1.05698	4.88459	0.206716	1	0	0.206716	1.26265	2.41646	ICD9CM	Chronic sinusitis NOS	RE_462.2	Chronic sinusitis	Respiratory
173.91	3.55729	-1.97482	9.0894	0.20755	1	0	0.20755	1.26033	4.48336	ICD9CM	Basal cell carcinoma of skin, site unspecified	CA_103.21	Basal cell carcinoma	Neoplasms
R92.0	5.01528	-2.80188	12.8324	0.208579	1	0	0.208579	1.25748	6.30663	ICD10CM	Mammographic microcalcification found on diagnostic imaging of breast	CA_142.21	Mammographic microcalcification	Neoplasms
M48.06	7.06911	-3.98673	18.1249	0.210124	1	0	0.210124	1.25322	8.85918	ICD10CM	Spinal stenosis, lumbar region	MS_715.4	Spinal stenosis	Muscloskeletal
692.79	4.98552	-2.82036	12.7914	0.210633	1	0	0.210633	1.25183	6.24101	ICD9CM	Other dermatitis due to solar radiation	DE_672.1	Acute skin changes due to ultraviolet radiation	Dermatological
709.2	0.0116633	-0.518868	0.542195	0.965631	2	36.2847	0.965631	0.0430882	0.000502551	ICD9CM	Scar conditions and fibrosis of skin	DE_676.2	Scar conditions and fibrosis of skin	Dermatological
719.97	6.99234	-4.04899	18.0337	0.214516	1	0	0.214516	1.24124	8.6792	ICD9CM	Unspecified disorder of ankle and foot joint	MS_713	Symptoms related to joints	Muscloskeletal
153.6	-7.00753	-18.0959	4.08082	0.215469	1	0	0.215469	-1.23867	8.67999	ICD9CM	Malignant neoplasm of ascending colon	CA_101.411	Malignant neoplasm of colon	Neoplasms
153.6	-7.00753	-18.0959	4.08082	0.215469	1	0	0.215469	-1.23867	8.67999	ICD9CM	Malignant neoplasm of ascending colon	CA_130	Cancer (solid tumor, excluding BCC)	Neoplasms
173.9	-7.00753	-18.0959	4.08082	0.215469	1	0	0.215469	-1.23867	8.67999	ICD9CM	Unspecified malignant neoplasm of skin, site unspecified	CA_103	Malignant neoplasm of the skin	Neoplasms
M65.30	6.93058	-4.11357	17.9747	0.21871	1	0	0.21871	1.22997	8.52438	ICD10CM	Trigger finger, unspecified finger	MS_721.11	Trigger finger	Muscloskeletal
J32.8	6.93058	-4.11357	17.9747	0.21871	1	0	0.21871	1.22997	8.52438	ICD10CM	Other chronic sinusitis	RE_462.2	Chronic sinusitis	Respiratory
J31.0	-0.253435	-0.668735	0.161865	0.231673	2	38.5667	0.231673	-1.19606	0.303124	ICD10CM	Chronic rhinitis	RE_463.1	Chronic rhinitis	Respiratory
G44.89	6.93058	-4.11357	17.9747	0.21871	1	0	0.21871	1.22997	8.52438	ICD10CM	Other headache syndrome	NS_331.3	Headache syndromes, non migraine	Neurological
617.9	3.46742	-2.07394	9.00877	0.220034	1	0	0.220034	1.22644	4.25257	ICD9CM	Endometriosis, site unspecified	GU_615	Endometriosis	Genitourinary
256.8	-6.91181	-17.9683	4.14466	0.220474	1	0	0.220474	-1.22527	8.46883	ICD9CM	Other ovarian dysfunction	EM_214	Disorders of ovarian function	Endocrine/Metab
623.5	-6.91181	-17.9683	4.14466	0.220474	1	0	0.220474	-1.22527	8.46883	ICD9CM	Leukorrhea, not specified as infective	GU_618	Noninflammatory disorders of vagina	Genitourinary
519.19	-6.87951	-17.9252	4.16619	0.222188	1	0	0.222188	-1.22073	8.39803	ICD9CM	Other diseases of trachea and bronchus	RE_486	Other respiratory disorders	Respiratory
446.4	-6.87951	-17.9252	4.16619	0.222188	1	0	0.222188	-1.22073	8.39803	ICD9CM	Wegener's granulomatosis	BI_181	Autoimmune disease	Blood/Immune
446.4	-6.87951	-17.9252	4.16619	0.222188	1	0	0.222188	-1.22073	8.39803	ICD9CM	Wegener's granulomatosis	MS_704.2	Wegener's granulomatosis	Muscloskeletal
625.9	-1.86795	-2.19829	-1.53762	1.51344e-28	2	0	1.51344e-28	-11.0832	20.7029	ICD9CM	Unspecified symptom associated with female genital organs	GU_625	Pain and other symptoms associated with female genital organs	Genitourinary
202.8	3.41169	-2.11865	8.94203	0.226612	1	0	0.226612	1.20913	4.12518	ICD9CM	Other malignant lymphomas, unspecified site, extranodal and solid organ sites	CA_120.2	Lymphoid	Neoplasms
202.8	3.41169	-2.11865	8.94203	0.226612	1	0	0.226612	1.20913	4.12518	ICD9CM	Other malignant lymphomas, unspecified site, extranodal and solid organ sites	CA_122.2	Non-Hodgkin lymphoma	Neoplasms
747.6	4.79003	-3.03823	12.6183	0.23041	1	0	0.23041	1.1993	5.7447	ICD9CM	Congenital anomaly of the peripheral vascular system, unspecified site	CM_764	Congenital malformations of circulatory system (other than heart)	Congenital
715.27	6.79943	-4.31348	17.9123	0.23044	1	0	0.23044	1.19923	8.15404	ICD9CM	Osteoarthrosis, localized, secondary, involving ankle and foot	MS_708	Osteoarthritis	Muscloskeletal
179	-4.75187	-12.5898	3.08603	0.234721	1	0	0.234721	-1.18829	5.64657	ICD9CM	Malignant neoplasm of uterus, part unspecified	CA_106.2	Malignant neoplasm of the uterus	Neoplasms
179	-4.75187	-12.5898	3.08603	0.234721	1	0	0.234721	-1.18829	5.64657	ICD9CM	Malignant neoplasm of uterus, part unspecified	CA_130	Cancer (solid tumor, excluding BCC)	Neoplasms
585.5	7.01394	-4.55699	18.5849	0.234797	1	0	0.234797	1.18809	8.33321	ICD9CM	Chronic kidney disease, Stage V	GU_582.21	End stage renal disease [CDK, stage 5]	Genitourinary
696.3	6.65383	-4.42333	17.731	0.239062	1	0	0.239062	1.17733	7.83378	ICD9CM	Pityriasis rosea	DE_664.2	Pityriasis	Dermatological
375.15	-2.5237	-6.7272	1.6798	0.239298	1	0	0.239298	-1.17674	2.96975	ICD9CM	Tear film insufficiency NOS	SO_363.2	Dry eye syndrome [Tear film insufficiency]	Sense organs
C50.912	2.9529	-2.01217	7.91798	0.243743	1	0	0.243743	1.16568	3.44215	ICD10CM	Malignant neoplasm of unspecified site of left female breast	CA_105.1	Malignant neoplasm of the breast, female	Neoplasms
C50.912	2.9529	-2.01217	7.91798	0.243743	1	0	0.243743	1.16568	3.44215	ICD10CM	Malignant neoplasm of unspecified site of left female breast	CA_130	Cancer (solid tumor, excluding BCC)	Neoplasms
709.09	0.797646	0.351176	1.24411	0.000462473	2	0	0.000462473	3.5016	2.79304	ICD9CM	Other dyschromia	DE_674	Disorders of pigmentation	Dermatological
396.1	6.54068	-4.51377	17.5951	0.246175	1	0	0.246175	1.15969	7.58516	ICD9CM	Mitral valve stenosis and aortic valve insufficiency	CV_413.11	Mitral valve insufficiency	Cardiovascular
396.1	6.54068	-4.51377	17.5951	0.246175	1	0	0.246175	1.15969	7.58516	ICD9CM	Mitral valve stenosis and aortic valve insufficiency	CV_413.22	Aortic insufficiency	Cardiovascular
272.4	1.25279	0.995316	1.51027	1.47767e-21	2	0	1.47767e-21	9.53648	11.9472	ICD9CM	Other and unspecified hyperlipidemia	EM_239	Hyperlipidemia	Endocrine/Metab
J98.11	-2.9304	-7.88979	2.029	0.246815	1	0	0.246815	-1.15812	3.39375	ICD10CM	Atelectasis	RE_479.6	Pulmonary collapse [Atelectasis]	Respiratory
436	-4.60538	-12.4162	3.20544	0.247826	1	0	0.247826	-1.15565	5.32218	ICD9CM	Acute, but ill-defined cerebrovascular disease	CV_433	Other cerebrovascular disease	Cardiovascular
627.1	2.9656	2.51375	3.41744	7.18566e-38	2	0	7.18566e-38	12.8639	38.1492	ICD9CM	Postmenopausal bleeding	GU_627.1	Postmenopausal bleeding	Genitourinary
719.44	-3.75585	-10.1362	2.62453	0.248596	1	0	0.248596	-1.15377	4.33337	ICD9CM	Pain in joint involving hand	MS_713.35	Pain in joints of hand	Muscloskeletal
424	0.1665	-0.375951	0.708952	0.547446	2	8.61226	0.547446	0.601592	0.100165	ICD9CM	Mitral valve disorders	CV_413.1	Mitral valve disorders	Cardiovascular
E06.3	-6.46438	-17.5028	4.57408	0.251042	1	0	0.251042	-1.14782	7.41995	ICD10CM	Autoimmune thyroiditis	BI_181	Autoimmune disease	Blood/Immune
E06.3	-6.46438	-17.5028	4.57408	0.251042	1	0	0.251042	-1.14782	7.41995	ICD10CM	Autoimmune thyroiditis	EM_200.411	Hashimoto thyroiditis [Chronic lymphocytic thyroiditis]	Endocrine/Metab
E07.9	-6.46438	-17.5028	4.57408	0.251042	1	0	0.251042	-1.14782	7.41995	ICD10CM	Disorder of thyroid, unspecified	EM_200	Disorders of thyroid gland	Endocrine/Metab
N92.0	-1.20542	-1.81339	-0.597446	0.000101913	2	0	0.000101913	-3.88599	4.68425	ICD10CM	Excessive and frequent menstruation with regular cycle	GU_626.16	Excessive menstruation	Genitourinary
N85.2	-6.46438	-17.5028	4.57408	0.251042	1	0	0.251042	-1.14782	7.41995	ICD10CM	Hypertrophy of uterus	GU_616.2	Hypertrophy of uterus	Genitourinary
D44.0	-6.46438	-17.5028	4.57408	0.251042	1	0	0.251042	-1.14782	7.41995	ICD10CM	Neoplasm of uncertain behavior of thyroid gland	CA_110.1	Malignant neoplasm of the thyroid	Neoplasms
E03.8	-6.46438	-17.5028	4.57408	0.251042	1	0	0.251042	-1.14782	7.41995	ICD10CM	Other specified hypothyroidism	EM_200.1	Hypothyroidism	Endocrine/Metab
D44.9	-6.46438	-17.5028	4.57408	0.251042	1	0	0.251042	-1.14782	7.41995	ICD10CM	Neoplasm of uncertain behavior of unspecified endocrine gland	CA_110	Malignant neoplasm of the endocrine glands	Neoplasms
416	6.45982	-4.61065	17.5303	0.25275	1	0	0.25275	1.14369	7.38806	ICD9CM	Primary pulmonary hypertension	CV_406.11	Primary pulmonary hypertension	Cardiovascular
706.8	0.381604	-0.235987	0.999195	0.225879	2	35.0738	0.225879	1.21104	0.462139	ICD9CM	Other specified diseases of sebaceous glands	DE_682	Other follicular disorders	Dermatological
244.8	2.43283	-1.76597	6.63163	0.256105	1	0	0.256105	1.13565	2.76284	ICD9CM	Other specified acquired hypothyroidism	EM_200.11	Secondary hypothyroidism	Endocrine/Metab
593.2	-3.21111	-8.75919	2.33698	0.256626	1	0	0.256626	-1.1344	3.64269	ICD9CM	Cyst of kidney, acquired	GU_586.2	Cyst of kidney	Genitourinary
112	6.39155	-4.65939	17.4425	0.256959	1	0	0.256959	1.13361	7.24551	ICD9CM	Candidiasis of mouth	ID_070	Candidiasis	Infections
112	6.39155	-4.65939	17.4425	0.256959	1	0	0.256959	1.13361	7.24551	ICD9CM	Candidiasis of mouth	ID_089.3	Fungal infections	Infections
112.9	6.39155	-4.65939	17.4425	0.256959	1	0	0.256959	1.13361	7.24551	ICD9CM	Candidiasis of unspecified site	ID_070	Candidiasis	Infections
112.9	6.39155	-4.65939	17.4425	0.256959	1	0	0.256959	1.13361	7.24551	ICD9CM	Candidiasis of unspecified site	ID_089.3	Fungal infections	Infections
511	6.39155	-4.65939	17.4425	0.256959	1	0	0.256959	1.13361	7.24551	ICD9CM	Pleurisy without mention of effusion or current tuberculosis	RE_491	Pleurisy	Respiratory
289.81	-3.71548	-10.1776	2.74667	0.259775	1	0	0.259775	-1.12692	4.18706	ICD9CM	Primary hypercoagulable state	BI_168.21	Primary thrombophilia	Blood/Immune
54.19	6.34452	-4.71464	17.4037	0.26083	1	0	0.26083	1.12443	7.13397	ICD9CM	Other genital herpes	ID_052.1	Herpes simplex	Infections
54.19	6.34452	-4.71464	17.4037	0.26083	1	0	0.26083	1.12443	7.13397	ICD9CM	Other genital herpes	ID_088	Sexually transmitted disease	Infections
54.19	6.34452	-4.71464	17.4037	0.26083	1	0	0.26083	1.12443	7.13397	ICD9CM	Other genital herpes	ID_089.2	Viral infections	Infections
719.86	-6.29638	-17.3413	4.74857	0.263851	1	0	0.263851	-1.11733	7.03516	ICD9CM	Other specified disorders of lower leg joint	MS_713	Symptoms related to joints	Muscloskeletal
746.6	-6.29638	-17.3413	4.74857	0.263851	1	0	0.263851	-1.11733	7.03516	ICD9CM	Congenital mitral insufficiency	CV_413.11	Mitral valve insufficiency	Cardiovascular
746.6	-6.29638	-17.3413	4.74857	0.263851	1	0	0.263851	-1.11733	7.03516	ICD9CM	Congenital mitral insufficiency	CM_763.234	Congenital mitral insufficiency	Congenital
726.32	0.1854	-0.343714	0.714515	0.492229	2	12.8237	0.492229	0.686767	0.127327	ICD9CM	Lateral epicondylitis	MS_723.4	Lateral epicondylitis (Tennis elbow)	Muscloskeletal
389.18	-3.14003	-8.66885	2.3888	0.265641	1	0	0.265641	-1.11316	3.49534	ICD9CM	Sensorineural hearing loss, bilateral	SO_396.2	Sensorineural hearing loss	Sense organs
389.18	-3.14003	-8.66885	2.3888	0.265641	1	0	0.265641	-1.11316	3.49534	ICD9CM	Sensorineural hearing loss, bilateral	SO_396.8	Bilateral hearing loss	Sense organs
618.01	-6.26702	-17.3058	4.77173	0.265816	1	0	0.265816	-1.11275	6.97363	ICD9CM	Cystocele, midline	GU_623.1	Uterine/Uterovaginal prolapse	Genitourinary
618.83	-6.26702	-17.3058	4.77173	0.265816	1	0	0.265816	-1.11275	6.97363	ICD9CM	Pelvic muscle wasting	GU_623.5	Pelvic muscle wasting	Genitourinary
787.99	-0.0704345	-0.716636	0.575767	0.830834	2	16.1858	0.830834	-0.213632	0.015047	ICD9CM	Other symptoms involving digestive system	GI_529	Symptoms involving digestive system	Gastrointestinal
218.2	6.22364	-4.83648	17.2838	0.270066	1	0	0.270066	1.10291	6.86412	ICD9CM	Subserous leiomyoma of uterus	CA_144.21	Leiomyoma of uterus	Neoplasms
553.21	3.57278	-2.82132	9.96689	0.273441	1	0	0.273441	1.09517	3.91282	ICD9CM	Incisional hernia without mention of obstruction or gangrene	GI_520	Hernia	Gastrointestinal
477	0.46048	0.0468329	0.874128	0.0291191	4	0	0.0291191	2.18187	1.00471	ICD9CM	Allergic rhinitis due to pollen	RE_463.21	Seasonal allergic rhinitis	Respiratory
477	0.46048	0.0468329	0.874128	0.0291191	4	0	0.0291191	2.18187	1.00471	ICD9CM	Allergic rhinitis due to pollen	SS_840.8	Allergies related to other diseases/symptoms	Symptoms
477	0.46048	0.0468329	0.874128	0.0291191	4	0	0.0291191	2.18187	1.00471	ICD9CM	Allergic rhinitis due to pollen	RE_463.21	Seasonal allergic rhinitis	Respiratory
477	0.46048	0.0468329	0.874128	0.0291191	4	0	0.0291191	2.18187	1.00471	ICD9CM	Allergic rhinitis due to pollen	SS_840.8	Allergies related to other diseases/symptoms	Symptoms
781.99	-3.55375	-9.94228	2.83478	0.275585	1	0	0.275585	-1.09029	3.87462	ICD9CM	Other symptoms involving nervous and musculoskeletal systems	SS_819	General symptoms and other findings	Symptoms
516.8	6.08441	-4.95311	17.1219	0.279943	1	0	0.279943	1.08045	6.57388	ICD9CM	Other specified alveolar and parietoalveolar pneumonopathies	RE_481	Interstitial pulmonary diseases	Respiratory
R10.31	-0.318523	-1.04068	0.403638	0.387325	2	26.3294	0.387325	-0.864479	0.275356	ICD10CM	Right lower quadrant pain	GI_527	Abdominal pain	Gastrointestinal
Z98.890	-2.154	-6.07991	1.77191	0.282205	1	0	0.282205	-1.07538	2.31637
560.9	-4.28934	-12.1088	3.53009	0.282305	1	0	0.282305	-1.07516	4.61171	ICD9CM	Unspecified intestinal obstruction	GI_514.2	Intestinal obstruction	Gastrointestinal
R19.4	-4.27628	-12.0872	3.53459	0.283245	1	0	0.283245	-1.07306	4.5887	ICD10CM	Change in bowel habit	GI_529	Symptoms involving digestive system	Gastrointestinal
511.9	-4.30208	-12.1801	3.57593	0.284471	1	0	0.284471	-1.07033	4.60465	ICD9CM	Pleural effusion NOS	RE_483	Pleural effusion	Respiratory
273.1	6.06266	-5.04369	17.169	0.284659	1	0	0.284659	1.06991	6.48651	ICD9CM	Monoclonal paraproteinemia	BI_180.31	Monoclonal gammopathy	Blood/Immune
790.22	6.06266	-5.04369	17.169	0.284659	1	0	0.284659	1.06991	6.48651	ICD9CM	Impaired glucose tolerance test (oral)	EM_204.2	Impaired glucose tolerance (oral)	Endocrine/Metab
622.4	4.26632	-3.55576	12.0884	0.285059	1	0	0.285059	1.06902	4.5608	ICD9CM	Stricture and stenosis of cervix	GU_617.3	Stricture and stenosis of cervix	Genitourinary
482.9	6.02372	-5.02761	17.075	0.285371	1	0	0.285371	1.06833	6.43533	ICD9CM	Bacterial pneumonia NOS	ID_089.1	Bacterial infections	Infections
482.9	6.02372	-5.02761	17.075	0.285371	1	0	0.285371	1.06833	6.43533	ICD9CM	Bacterial pneumonia NOS	RE_468.2	Bacterial pneumonia	Respiratory
S42.201D	6.00891	-5.03083	17.0487	0.286051	1	0	0.286051	1.06682	6.41046	ICD10CM	Unspecified fracture of upper end of right humerus, subsequent encounter for fracture with routine healing	MS_745.3	Fracture of upper limb	Muscloskeletal
S42.294D	6.00891	-5.03083	17.0487	0.286051	1	0	0.286051	1.06682	6.41046	ICD10CM	Other nondisplaced fracture of upper end of right humerus, subsequent encounter for fracture with routine healing	MS_745.3	Fracture of upper limb	Muscloskeletal
M53.3	6.00891	-5.03083	17.0487	0.286051	1	0	0.286051	1.06682	6.41046	ICD10CM	Sacrococcygeal disorders, not elsewhere classified	MS_717.2	Sacrococcygeal disorders	Muscloskeletal
S42.294S	6.00891	-5.03083	17.0487	0.286051	1	0	0.286051	1.06682	6.41046	ICD10CM	Other nondisplaced fracture of upper end of right humerus, sequela	MS_745.3	Fracture of upper limb	Muscloskeletal
M25.511	0.895103	0.298274	1.49193	0.00328756	2	0	0.00328756	2.93949	2.63114	ICD10CM	Pain in right shoulder	MS_713.31	Pain in shoulder	Muscloskeletal
M81.6	6.00891	-5.03083	17.0487	0.286051	1	0	0.286051	1.06682	6.41046	ICD10CM	Localized osteoporosis [Lequesne]	MS_726.1	Osteoporosis	Muscloskeletal
M75.51	6.00891	-5.03083	17.0487	0.286051	1	0	0.286051	1.06682	6.41046	ICD10CM	Bursitis of right shoulder	MS_721.5	Bursitis	Muscloskeletal
S42.209A	6.00891	-5.03083	17.0487	0.286051	1	0	0.286051	1.06682	6.41046	ICD10CM	Unspecified fracture of upper end of unspecified humerus, initial encounter for closed fracture	MS_745.3	Fracture of upper limb	Muscloskeletal
M67.911	6.00891	-5.03083	17.0487	0.286051	1	0	0.286051	1.06682	6.41046	ICD10CM	Unspecified disorder of synovium and tendon, right shoulder	MS_723	Enthesopathy/Enthesitis/Tendinopathy	Muscloskeletal
R97.0	5.99994	-5.04482	17.0447	0.28699	1	0	0.28699	1.06475	6.38841	ICD10CM	Elevated carcinoembryonic antigen [CEA]	SS_822.81	Elevated carcinoembryonic antigen [CEA]	Symptoms
R93.89	1.39703	0.714799	2.07926	5.98263e-05	2	0	5.98263e-05	4.01349	5.60697	ICD10CM	Abnormal findings on diagnostic imaging of other specified body structures	SS_848	Nonspecific abnormal findings of other body structures	Symptoms
D64.81	5.99994	-5.04482	17.0447	0.28699	1	0	0.28699	1.06475	6.38841	ICD10CM	Anemia due to antineoplastic chemotherapy	BI_164.6	Anemia secondary to chronic diseases and conditions	Blood/Immune
K66.8	5.99994	-5.04482	17.0447	0.28699	1	0	0.28699	1.06475	6.38841	ICD10CM	Other specified disorders of peritoneum	GI_537	Abnormality of the peritoneum	Gastrointestinal
K52.1	5.99994	-5.04482	17.0447	0.28699	1	0	0.28699	1.06475	6.38841	ICD10CM	Toxic gastroenteritis and colitis	GI_522.4	Toxic gastroenteritis and colitis	Gastrointestinal
R94.2	5.99994	-5.04482	17.0447	0.28699	1	0	0.28699	1.06475	6.38841	ICD10CM	Abnormal results of pulmonary function studies	RE_496	Abnormal results of pulmonary function studies	Respiratory
E86.0	-0.772456	-1.41704	-0.127871	0.0188351	2	31.0023	0.0188351	-2.34878	1.81433	ICD10CM	Dehydration	EM_256.71	Dehydration	Endocrine/Metab
B96.81	5.99994	-5.04482	17.0447	0.28699	1	0	0.28699	1.06475	6.38841	ICD10CM	Helicobacter pylori [H. pylori] as the cause of diseases classified elsewhere	ID_008	Helicobacter [H. pylori]	Infections
B96.81	5.99994	-5.04482	17.0447	0.28699	1	0	0.28699	1.06475	6.38841	ICD10CM	Helicobacter pylori [H. pylori] as the cause of diseases classified elsewhere	ID_089.1	Bacterial infections	Infections
T80.90XA	5.99994	-5.04482	17.0447	0.28699	1	0	0.28699	1.06475	6.38841
T80.90XD	5.99994	-5.04482	17.0447	0.28699	1	0	0.28699	1.06475	6.38841
R93.8	1.39703	0.714799	2.07926	5.98263e-05	2	0	5.98263e-05	4.01349	5.60697	ICD10CM	Abnormal findings on diagnostic imaging of other specified body structures	SS_848	Nonspecific abnormal findings of other body structures	Symptoms
C76.3	5.99994	-5.04482	17.0447	0.28699	1	0	0.28699	1.06475	6.38841	ICD10CM	Malignant neoplasm of pelvis	CA_112	Malignant neoplasm of other and ill-defined sites	Neoplasms
C76.3	5.99994	-5.04482	17.0447	0.28699	1	0	0.28699	1.06475	6.38841	ICD10CM	Malignant neoplasm of pelvis	CA_130	Cancer (solid tumor, excluding BCC)	Neoplasms
R60.9	5.99994	-5.04482	17.0447	0.28699	1	0	0.28699	1.06475	6.38841	ICD10CM	Edema, unspecified	SS_812	Edema	Symptoms
K90.9	5.99994	-5.04482	17.0447	0.28699	1	0	0.28699	1.06475	6.38841	ICD10CM	Intestinal malabsorption, unspecified	GI_525	Intestinal malabsorption	Gastrointestinal
D70.1	5.99994	-5.04482	17.0447	0.28699	1	0	0.28699	1.06475	6.38841	ICD10CM	Agranulocytosis secondary to cancer chemotherapy	BI_170.12	Drug induced neutropenia	Blood/Immune
N73.6	5.99994	-5.04482	17.0447	0.28699	1	0	0.28699	1.06475	6.38841	ICD10CM	Female pelvic peritoneal adhesions (postinfective)	GU_614.1	Pelvic peritoneal adhesions, female (postoperative) (postinfection)	Genitourinary
G89.3	5.99994	-5.04482	17.0447	0.28699	1	0	0.28699	1.06475	6.38841	ICD10CM	Neoplasm related pain (acute) (chronic)	CA_132	Sequelae of cancer	Neoplasms
J92.9	5.99994	-5.04482	17.0447	0.28699	1	0	0.28699	1.06475	6.38841	ICD10CM	Pleural plaque without asbestos	RE_491	Pleurisy	Respiratory
K29.70	5.99994	-5.04482	17.0447	0.28699	1	0	0.28699	1.06475	6.38841	ICD10CM	Gastritis, unspecified, without bleeding	GI_522.9	Gastritis	Gastrointestinal
C48.2	5.99994	-5.04482	17.0447	0.28699	1	0	0.28699	1.06475	6.38841	ICD10CM	Malignant neoplasm of peritoneum, unspecified	CA_104.2	Malignant neoplasm of retroperitoneum and peritoneum	Neoplasms
C48.2	5.99994	-5.04482	17.0447	0.28699	1	0	0.28699	1.06475	6.38841	ICD10CM	Malignant neoplasm of peritoneum, unspecified	CA_130	Cancer (solid tumor, excluding BCC)	Neoplasms
K12.30	5.99994	-5.04482	17.0447	0.28699	1	0	0.28699	1.06475	6.38841
D72.819	5.99994	-5.04482	17.0447	0.28699	1	0	0.28699	1.06475	6.38841	ICD10CM	Decreased white blood cell count, unspecified	BI_170	Decreased white blood cell count	Blood/Immune
C48.1	5.99994	-5.04482	17.0447	0.28699	1	0	0.28699	1.06475	6.38841	ICD10CM	Malignant neoplasm of specified parts of peritoneum	CA_104.2	Malignant neoplasm of retroperitoneum and peritoneum	Neoplasms
C48.1	5.99994	-5.04482	17.0447	0.28699	1	0	0.28699	1.06475	6.38841	ICD10CM	Malignant neoplasm of specified parts of peritoneum	CA_130	Cancer (solid tumor, excluding BCC)	Neoplasms
D86.9	5.99994	-5.04482	17.0447	0.28699	1	0	0.28699	1.06475	6.38841	ICD10CM	Sarcoidosis, unspecified	DE_688.1	Sarcoidosis	Dermatological
431	4.2401	-3.56666	12.0469	0.287085	1	0	0.287085	1.06454	4.51375	ICD9CM	Intracerebral hemorrhage	CV_430.2	Nontraumatic intracerebral hemorrhage	Cardiovascular
431	4.2401	-3.56666	12.0469	0.287085	1	0	0.287085	1.06454	4.51375	ICD9CM	Intracerebral hemorrhage	CV_431.12	Hemorrhagic stroke	Cardiovascular
V49.9	-3.44974	-9.84079	2.9413	0.290072	1	0	0.290072	-1.05796	3.64971
836.1	5.88843	-5.14988	16.9267	0.29576	1	0	0.29576	1.04557	6.15677	ICD9CM	Tear of lateral cartilage or meniscus of knee, current	MS_742	Cartilage tear of knee	Muscloskeletal
C34.2	-5.87618	-16.9316	5.17921	0.297513	1	0	0.297513	-1.04178	6.1217	ICD10CM	Malignant neoplasm of middle lobe, bronchus or lung	CA_102.1	Malignant neoplasm of the of bronchus and lung	Neoplasms
C34.2	-5.87618	-16.9316	5.17921	0.297513	1	0	0.297513	-1.04178	6.1217	ICD10CM	Malignant neoplasm of middle lobe, bronchus or lung	CA_130	Cancer (solid tumor, excluding BCC)	Neoplasms
J93.83	-5.87618	-16.9316	5.17921	0.297513	1	0	0.297513	-1.04178	6.1217	ICD10CM	Other pneumothorax	RE_484	Pneumothorax and air leak	Respiratory
724.2	-0.140157	-0.421526	0.141212	0.328913	2	0	0.328913	-0.976306	0.136836	ICD9CM	Lumbago	MS_718.4	Low back pain	Muscloskeletal
N64.89	0.795181	0.356719	1.23364	0.000378653	2	0	0.000378653	3.55453	2.8265	ICD10CM	Other specified disorders of breast	GU_612.8	Other specified disorders of breast	Genitourinary
I48.91	5.85285	-5.18606	16.8918	0.298714	1	0	0.298714	1.0392	6.08225	ICD10CM	Unspecified atrial fibrillation	CV_416.21	Atrial fibrillation	Cardiovascular
I44.0	5.85285	-5.18606	16.8918	0.298714	1	0	0.298714	1.0392	6.08225	ICD10CM	Atrioventricular block, first degree	CV_416.411	Atrioventricular block, first degree	Cardiovascular
716.97	5.85033	-5.20688	16.9075	0.299723	1	0	0.299723	1.03703	6.06695	ICD9CM	Arthropathy unspecified, involving ankle and foot	MS_707	Other arthropathies	Muscloskeletal
610.1	-0.101855	-0.445974	0.242265	0.561831	2	19.227	0.561831	-0.580124	0.0590884	ICD9CM	Diffuse cystic mastopathy	GU_610.1	Cystic mastopathy	Genitourinary
443.9	5.82079	-5.23836	16.8799	0.302254	1	0	0.302254	1.03161	6.0048	ICD9CM	Peripheral vascular disease, unspecified	CV_448.9	Peripheral vascular disease NOS [includes PAD]	Cardiovascular
786.51	5.82079	-5.23836	16.8799	0.302254	1	0	0.302254	1.03161	6.0048	ICD9CM	Precordial pain	SS_800.2	Precordial pain	Symptoms
680.9	5.78515	-5.25083	16.8211	0.30421	1	0	0.30421	1.02745	5.94394	ICD9CM	Carbuncle and furuncle of unspecified site	DE_660.4	Carbuncle and furuncle	Dermatological
455.3	5.78515	-5.25083	16.8211	0.30421	1	0	0.30421	1.02745	5.94394	ICD9CM	External hemorrhoids without mention of complication	CV_439	Hemorrhoids	Cardiovascular
830	5.77936	-5.25831	16.817	0.304768	1	0	0.304768	1.02626	5.93114	ICD9CM	Closed dislocation of jaw	MS_740.1	Dislocation of jaw	Muscloskeletal
355.71	-4.08988	-11.9046	3.72481	0.304995	1	0	0.304995	-1.02578	4.19532	ICD9CM	Causalgia of lower limb	NS_336.5	Mononeuritis of lower limb	Neurological
355.71	-4.08988	-11.9046	3.72481	0.304995	1	0	0.304995	-1.02578	4.19532	ICD9CM	Causalgia of lower limb	NS_343.3	Complex regional pain syndrome	Neurological
216.8	5.77637	-5.27792	16.8307	0.305746	1	0	0.305746	1.02419	5.91609	ICD9CM	Benign neoplasm of other specified sites of skin	CA_138	Benign neoplasm of the skin	Neoplasms
[truncated: 1,368 more rows]

## Sheet: AFR_meta_MAPS
Variable	Estimate	CI_lower	CI_upper	p_value	k_value	i2_value	p_value2	Z_value	SE_value	ICD_SYSTEM	ICD_DESCRIPTION	phecode	PHECODE_DESCRIPTION	CATEGORY
[truncated: 1,557 more rows]

[truncated: 30 more sheets: AMR_meta_MAPS, META_meta_MAPS, EUR_meta_prospective, AFR_meta_prospective, AMR_meta_prospective, META_meta_prospective, EUR_meta_ANM-PheWAS , AFR_meta_ANM-PheWAS , AMR_meta_ANM-PheWAS , META_meta_ANM-PheWAS , GC_results, GC_filtered, EUR_phewas_phecodeX, MR_results, MR_filtered_results, Sig_MR_tests, Phenotype_descriptions, supp_Figure_1, supp_Figure_2, supp_Figure_3 …]
